# Supplementary material
Source: publisher figshare collection journal article supplement (https://acs.figshare.com/ndownloader/files/22090881)
Supplement: Supplementary file 1 [file 22090881]

## Sheet: Fr1
Peptide	MatchedProteins	Quantity_1	Quantity_2	Quantity_3	Quantity_4	Quantity_5	Quantity_6	QValue	Decoy
FQSSAVMALQEASEAYLVGLFEDTNLC+57.021AIHAK+0.000	sp|Q71DI3|H32_HUMAN	6239781	7.40957e+06	12382342	7.75894e+06	9095698	15593068	0.000829187	FALSE
ELLLSAIDSVNATSK+0.000	sp|P46087|NOP2_HUMAN;sp|P46087-2|NOP2_HUMAN;sp|P46087-3|NOP2_HUMAN;sp|P46087-4|NOP2_HUMAN	11695448	5.0342e+06	28774126	2.24462e+06	25956142	58839596	0	FALSE
TK+0.000ENVVQSVTSVAEK+0.000	sp|O76070|SYUG_HUMAN	7.15849e+06	862049	15506104	0	12787235	9644214	0	FALSE
VINQILTEMDGMSTK+0.000	sp|P55072|TERA_HUMAN	23139062	6.92379e+06	48470556	14254979	35572448	91190768	0.000106883	FALSE
AASAFFTYVSLSQEGR+0.000	sp|O00154|BACH_HUMAN;sp|O00154-4|BACH_HUMAN;sp|O00154-5|BACH_HUMAN;sp|O00154-6|BACH_HUMAN;sp|O00154-7|BACH_HUMAN	10389635	4711271	14801541	1.91263e+06	18826860	25257256	0	FALSE
ILHTLLASGEDALDFTQESEPSYISDVGPPGR+0.000	tr|H3BM93|H3BM93_HUMAN;tr|H3BMX0|H3BMX0_HUMAN;tr|H3BP95|H3BP95_HUMAN;tr|H3BVG0|H3BVG0_HUMAN;sp|Q8N1F7|NUP93_HUMAN;sp|Q8N1F7-2|NUP93_HUMAN	3693149	2666788	17551742	3751055	18604966	30367778	0	FALSE
LAQANGWGVMVSHR+0.000	tr|A0A2R8Y6G6|A0A2R8Y6G6_HUMAN;sp|P06733|ENOA_HUMAN;sp|P06733-2|ENOA_HUMAN	35760156	33889200	95588992	36987616	59275036	233244288	0	FALSE
NLELK+0.000DLLPYGFAIHHAGMTR+0.000	sp|O75643|U520_HUMAN	5.06819e+06	2.9278e+06	12957532	9095643	14300019	23349100	0	FALSE
K+0.000DLYANTVLSGGTTM+15.995YPGIADR+0.000	tr|A0A2R8Y793|A0A2R8Y793_HUMAN;sp|P63261|ACTG_HUMAN;sp|P60709|ACTB_HUMAN	221282560	80616440	399093440	33597172	326539104	806845248	0	FALSE
GIFPVLC+57.021K+0.000DPVQEAWAEDVDLR+0.000	tr|B4DNK4|B4DNK4_HUMAN;tr|H3BR70|H3BR70_HUMAN;sp|P14618|KPYM_HUMAN;sp|P14618-2|KPYM_HUMAN;sp|P14618-3|KPYM_HUMAN	13631311	6876237	50559548	5.02184e+06	38488032	69693448	0	FALSE
LMEPIYLVEIQC+57.021PEQVVGGIYGVLNR+0.000	sp|P13639|EF2_HUMAN	28903666	15638815	38251016	9132832	28055712	76522640	0	FALSE
TGAPQYGSYGTAPVNLNIK+0.000	tr|A0A0B4J203|A0A0B4J203_HUMAN;sp|Q6UN15|FIP1_HUMAN;sp|Q6UN15-3|FIP1_HUMAN;sp|Q6UN15-4|FIP1_HUMAN;sp|Q6UN15-5|FIP1_HUMAN	14050485	5.01637e+06	24249510	7475783	22385996	40852624	0	FALSE
ATENDIYNFFSPLNPVR+0.000	tr|H0YB39|H0YB39_HUMAN;tr|E9PCY7|E9PCY7_HUMAN;tr|G8JLB6|G8JLB6_HUMAN;tr|H0YBD7|H0YBD7_HUMAN;tr|H0YBG7|H0YBG7_HUMAN;sp|P52597|HNRPF_HUMAN;sp|P31943|HNRH1_HUMAN	10909093	7.99057e+06	1.47232e+06	4.22445e+06	524957	2.46543e+06	0	FALSE
GNFTLPEVAEC+57.021FDEITYVELQK+0.000EEAQK+0.000LLEQYK+0.000EESK+0.000	tr|A0A1W2PQL0|A0A1W2PQL0_HUMAN;tr|A0A1W2PQD4|A0A1W2PQD4_HUMAN;tr|A0A1W2PP34|A0A1W2PP34_HUMAN;tr|Q5RI18|Q5RI18_HUMAN;tr|A0A1W2PPH7|A0A1W2PPH7_HUMAN;tr|A0A1W2PP35|A0A1W2PP35_HUMAN;tr|A0A1W2PPL4|A0A1W2PPL4_HUMAN;tr|A0A1W2PPS1|A0A1W2PPS1_HUMAN;tr|A0A1X7SBS1|A0A1X7SBS1_HUMAN;sp|Q00839|HNRPU_HUMAN;sp|Q00839-2|HNRPU_HUMAN	15954956	31737444	105239288	3699611	57961568	64511260	0	FALSE
GPGQVPTATSALSLELQEVEPLGLPQASPSR+0.000	sp|Q6P2E9|EDC4_HUMAN;sp|Q6P2E9-2|EDC4_HUMAN	2.27784e+06	419073	6713624	1.83936e+06	7.41986e+06	18211378	0	FALSE
TVVVNC+57.021NPETVSTDFDEC+57.021DK+0.000LYFEELSLER+0.000	sp|P31327|CPSM_HUMAN;sp|P31327-2|CPSM_HUMAN;sp|P31327-3|CPSM_HUMAN	9477812	7.35278e+06	33922384	7524214	37323196	49303760	0	FALSE
MVSDINNGWQHLEQAEK+0.000	sp|O43707|ACTN4_HUMAN;sp|O43707-2|ACTN4_HUMAN	3838976	931945	10755547	7990365	8845915	21452316	0	FALSE
SEPVK+0.000EESSELEQPFAQDTSSVGPDR+0.000	sp|Q15424|SAFB1_HUMAN;sp|Q15424-2|SAFB1_HUMAN;sp|Q15424-3|SAFB1_HUMAN;sp|Q15424-4|SAFB1_HUMAN;sp|Q14151|SAFB2_HUMAN	1.84909e+06	951636	12318700	0	13066238	24040398	0	FALSE
SWASLFHDSK+0.000PSSSSPVAYVETK+0.000	sp|Q14694|UBP10_HUMAN;sp|Q14694-2|UBP10_HUMAN;sp|Q14694-3|UBP10_HUMAN	3.30695e+06	3.38704e+06	4.44357e+06	1.26049e+06	10113596	22583734	0	FALSE
AASGYPVK+0.000VPLEVQEADEAK+0.000LQQTEAELR+0.000	tr|A0A140T936|A0A140T936_HUMAN;sp|P26640|SYVC_HUMAN	3975639	0	9297922	0	8939658	12979510	0	FALSE
ATNESEDEIPQLVPIGK+0.000	tr|J3QSV6|J3QSV6_HUMAN;sp|O76021|RL1D1_HUMAN;sp|O76021-2|RL1D1_HUMAN	50055168	17909688	92286808	30159944	78951280	153900336	0	FALSE
LNLSVTTPYNADFDGDEMNLHLPQSLETR+0.000	sp|P24928|RPB1_HUMAN;sp|P24928-2|RPB1_HUMAN	7198796	4432612	12392717	4.84329e+06	21158710	36741000	0	FALSE
SDALETLGFLNHYQMK+0.000	tr|M0QXS5|M0QXS5_HUMAN;tr|A0A3B3ITJ4|A0A3B3ITJ4_HUMAN;tr|M0QYT0|M0QYT0_HUMAN;tr|M0R076|M0R076_HUMAN;sp|P14866|HNRPL_HUMAN;sp|P14866-2|HNRPL_HUMAN	5.42126e+06	3.23103e+06	11512045	2.05136e+06	10946150	18781100	0	FALSE
LLLC+57.021GGAPLSATTQR+0.000	sp|O95573|ACSL3_HUMAN	28997760	11212381	66371000	0	53753032	83964976	0	FALSE
GIFPVLC+57.021K+0.000DPVQEAWAEDVDLR+0.000	tr|B4DNK4|B4DNK4_HUMAN;tr|H3BR70|H3BR70_HUMAN;sp|P14618|KPYM_HUMAN;sp|P14618-2|KPYM_HUMAN;sp|P14618-3|KPYM_HUMAN	13691735	6.87865e+06	50257372	5.66658e+06	35783612	69022984	0	FALSE
ADHQPLTEASYVNLPTIALC+57.021NTDSPLR+0.000	tr|A0A0C4DG17|A0A0C4DG17_HUMAN;tr|C9J9K3|C9J9K3_HUMAN;sp|P08865|RSSA_HUMAN	25699874	7417664	59732056	12039777	38657140	85114264	0	FALSE
YIYDQC+57.021PAVAGYGPIEQLPDYNR+0.000	sp|P31930|QCR1_HUMAN	16523147	2264657	38903448	14536949	36716348	66411128	0	FALSE
VVNAVLTQIDQIK+0.000R+0.000	sp|Q15645|PCH2_HUMAN	5867968	9081858	28602496	6468128	21442102	43277612	0	FALSE
K+0.000NNFSDTGNFGFGIQEHIDLGIK+0.000	tr|Q5VVC8|Q5VVC8_HUMAN;sp|P62913|RL11_HUMAN;sp|P62913-2|RL11_HUMAN	6378633	3.63041e+06	16578616	3.75429e+06	11982027	23181734	0	FALSE
NTGDADQWC+57.021PLLETLTDAEMEK+0.000K+0.000	tr|A0A0G2JRV3|A0A0G2JRV3_HUMAN;tr|G5E975|G5E975_HUMAN;sp|Q12824|SNF5_HUMAN;sp|Q12824-2|SNF5_HUMAN	9655989	2.49244e+06	13645527	3530881	24970470	32891996	0	FALSE
FTLDC+57.021THPVEDGIM+15.995DAANFEQFLQER+0.000	sp|P35268|RL22_HUMAN	1.77723e+06	728311	1.23803e+06	812802	505202	3.33211e+06	0	FALSE
SPPYTAFLGNLPYDVTEESIK+0.000EFFR+0.000	tr|F8VSC7|F8VSC7_HUMAN;tr|F8W0K0|F8W0K0_HUMAN;tr|F8VYE9|F8VYE9_HUMAN;tr|F8VRU1|F8VRU1_HUMAN;tr|E7EX17|E7EX17_HUMAN;tr|F8VP89|F8VP89_HUMAN;tr|F8VX11|F8VX11_HUMAN;sp|P23588|IF4B_HUMAN;sp|P23588-2|IF4B_HUMAN	33572340	19796212	67070512	11043527	65757384	113593672	0	FALSE
K+0.000EPFTLEAYYSSPQDLPYPDPAIAQFSVQK+0.000	tr|A0A087WYC1|A0A087WYC1_HUMAN;sp|P34932|HSP74_HUMAN	50985832	32467498	129036904	51772168	118382560	211801296	0	FALSE
YADLTEDQLPSC+57.021ESLK+0.000DTIAR+0.000	sp|P18669|PGAM1_HUMAN	612874688	362137152	1977690880	183491840	1625805184	2892402432	0	FALSE
VLNVPLC+57.021K+0.000EDC+57.021EQWWEDC+57.021R+0.000	sp|P15328|FOLR1_HUMAN	10714650	4.01205e+06	28566480	5307957	35076704	100973664	0	FALSE
YHGHSMSDPGVSYR+0.000	tr|Q5JPU3|Q5JPU3_HUMAN;sp|P29803|ODPAT_HUMAN;sp|P08559|ODPA_HUMAN;sp|P08559-2|ODPA_HUMAN;sp|P08559-3|ODPA_HUMAN;sp|P08559-4|ODPA_HUMAN	12598399	817623	27512986	2.25815e+06	30730226	45941572	0	FALSE
K+0.000GYEVIYLTEPVDEYC+57.021IQALPEFDGK+0.000R+0.000	sp|P14625|ENPL_HUMAN	18517640	10637745	57232344	4.78225e+06	49144152	79529576	0	FALSE
SVSSNVASVSPIPAGSK+0.000	tr|E9PHI6|E9PHI6_HUMAN;sp|Q9Y6G9|DC1L1_HUMAN	15054510	6.6928e+06	27771432	7.33758e+06	29345608	62268472	0	FALSE
AAVATFLQSVQVPEFTPK+0.000	tr|Q5JRR6|Q5JRR6_HUMAN;sp|P22314|UBA1_HUMAN;sp|P22314-2|UBA1_HUMAN	69111352	19503104	133402392	44568416	140645536	260156720	0	FALSE
AGVYPEK+0.000DQAENEDGAQENTFSMDPQLER+0.000	sp|P50570|DYN2_HUMAN;sp|P50570-2|DYN2_HUMAN;sp|P50570-3|DYN2_HUMAN;sp|P50570-4|DYN2_HUMAN;sp|P50570-5|DYN2_HUMAN	14599897	8.16455e+06	23815386	5112957	19801180	37160032	0	FALSE
NVLIFDLGGGTFDVSILTIEDGIFEVK+0.000	tr|E9PKE3|E9PKE3_HUMAN;tr|E9PN89|E9PN89_HUMAN;sp|P54652|HSP72_HUMAN;sp|P11142|HSP7C_HUMAN;sp|P11142-2|HSP7C_HUMAN	35656748	0	0	5461949	0	1.9697e+06	0.000829187	FALSE
DK+0.000YPNLQVIGGNVVTAAQAK+0.000	tr|H0Y4R1|H0Y4R1_HUMAN;sp|P12268|IMDH2_HUMAN	5.00271e+06	2726767	11470600	0	8614591	18965516	0	FALSE
SLGEIPIVESEIK+0.000K+0.000EAGELK+0.000PEEEITVGPVQK+0.000	sp|P53618|COPB_HUMAN	52914984	19433512	101396440	11372544	114750336	207255104	0	FALSE
TIEK+0.000FEK+0.000EAAEM+15.995GK+0.000	tr|A0A087WV01|A0A087WV01_HUMAN;tr|A0A2R8Y488|A0A2R8Y488_HUMAN;tr|A0A2R8YDN5|A0A2R8YDN5_HUMAN;tr|A0A087WVQ9|A0A087WVQ9_HUMAN;tr|Q5JR01|Q5JR01_HUMAN;tr|A6PW80|A6PW80_HUMAN;tr|A0A2U3TZH3|A0A2U3TZH3_HUMAN;tr|A0A2R8Y660|A0A2R8Y660_HUMAN;sp|Q5VTE0|EF1A3_HUMAN;sp|Q05639|EF1A2_HUMAN;sp|P68104|EF1A1_HUMAN;sp|P68104-2|EF1A1_HUMAN	131334864	8981136	26313746	5.68238e+06	37538604	88020328	0	FALSE
VGAGAPVYLAAVLEYLTAEILELAGNAAR+0.000	tr|H0YFX9|H0YFX9_HUMAN;tr|A0A3B3IS11|A0A3B3IS11_HUMAN;tr|A0A0U1RRH7|A0A0U1RRH7_HUMAN;tr|A0A0U1RR32|A0A0U1RR32_HUMAN;sp|Q9BTM1|H2AJ_HUMAN;sp|Q9BTM1-2|H2AJ_HUMAN;sp|P04908|H2A1B_HUMAN;sp|P20671|H2A1D_HUMAN;sp|P0C0S8|H2A1_HUMAN;sp|Q96KK5|H2A1H_HUMAN;sp|Q93077|H2A1C_HUMAN;sp|Q8IUE6|H2A2B_HUMAN;sp|Q99878|H2A1J_HUMAN;sp|Q7L7L0|H2A3_HUMAN;sp|P16104|H2AX_HUMAN	7240494	142519	396410	0	0	0	0.000829187	FALSE
VEPSDR+0.000YPQC+57.021LC+57.021LSPTYELALQTGK+0.000	tr|I3L352|I3L352_HUMAN;tr|I3L0H8|I3L0H8_HUMAN;tr|F6QDS0|F6QDS0_HUMAN;sp|Q9NUU7|DD19A_HUMAN;sp|Q9NUU7-2|DD19A_HUMAN	35723400	23560102	87111768	13456677	84363872	166566816	0	FALSE
NLLESYHVPELIK+0.000DAHLLVESK+0.000	sp|P42704|LPPRC_HUMAN	13982497	13478446	23630962	3916813	22715724	36044420	0	FALSE
AGLGSGLSLSGLVHPELSR+0.000	tr|G3V1M7|G3V1M7_HUMAN;sp|P49748|ACADV_HUMAN;sp|P49748-2|ACADV_HUMAN;sp|P49748-3|ACADV_HUMAN	30865128	11398351	43241420	1.12277e+06	42121504	75224728	0	FALSE
NVLIFDLGGGTFDVSILTIEDGIFEVK+0.000	tr|E9PKE3|E9PKE3_HUMAN;tr|E9PN89|E9PN89_HUMAN;sp|P54652|HSP72_HUMAN;sp|P11142|HSP7C_HUMAN;sp|P11142-2|HSP7C_HUMAN	41914528	766326	3.50669e+06	229963	394190	404264	0.000829187	FALSE
IFLDESAPDNVLEVTAR+0.000	tr|G3V4V5|G3V4V5_HUMAN;tr|A0A087X2H1|A0A087X2H1_HUMAN;sp|Q9ULT8|HECD1_HUMAN	7.10303e+06	1899992	7115352	0	18134772	37376948	0	FALSE
YESSALPSGQLTSLSEYASR+0.000	tr|I3L0K7|I3L0K7_HUMAN;sp|Q12931|TRAP1_HUMAN;sp|Q12931-2|TRAP1_HUMAN	52989824	19005500	97334504	8015519	92464376	171479248	0	FALSE
R+0.000MPQAPPSLC+57.021VTPYPEPSEC+57.021SWK+0.000DPEAEAALELALSITR+0.000	tr|A0A140T936|A0A140T936_HUMAN;sp|P26640|SYVC_HUMAN	11741135	5.42397e+06	33724596	8511220	23854630	33283462	0	FALSE
NLLESYHVPELIK+0.000DAHLLVESK+0.000	sp|P42704|LPPRC_HUMAN	11158533	33518672	25386522	3.64812e+06	22811008	37417644	0	FALSE
IPSAVGYQPTLATDM+15.995GTM+15.995QER+0.000	tr|F8W0P7|F8W0P7_HUMAN;tr|F8W079|F8W079_HUMAN;tr|H0YH81|H0YH81_HUMAN;tr|H0YI37|H0YI37_HUMAN;sp|P06576|ATPB_HUMAN	2.54902e+06	0	5398627	0	435889	3918987	0.000829187	FALSE
APVPTGEVYFADSFDR+0.000	tr|D6RD16|D6RD16_HUMAN;tr|H0Y9Q7|H0Y9Q7_HUMAN;tr|D6RB85|D6RB85_HUMAN;tr|D6RHJ3|D6RHJ3_HUMAN;tr|D6RAQ8|D6RAQ8_HUMAN;tr|D6RDP7|D6RDP7_HUMAN;tr|D6RAU8|D6RAU8_HUMAN;sp|P27824|CALX_HUMAN;sp|P27824-2|CALX_HUMAN	131367296	41511988	231770272	24709398	199758304	420941600	0	FALSE
IQVSSEK+0.000EAAPDAGAEPITADSDPAYSSK+0.000	tr|E5RHJ4|E5RHJ4_HUMAN;sp|Q8N163|CCAR2_HUMAN;sp|Q8N163-2|CCAR2_HUMAN	5.07545e+06	2.50067e+06	14712596	7.28587e+06	20717778	40259500	0	FALSE
TQASSSFQDSSQPAGK+0.000	sp|P46087|NOP2_HUMAN;sp|P46087-2|NOP2_HUMAN;sp|P46087-4|NOP2_HUMAN	10541187	3.55221e+06	15309682	4.193e+06	19984834	38596592	0	FALSE
SLPADILYEDQQC+57.021LVFR+0.000	sp|Q9BX68|HINT2_HUMAN	1.09089e+06	234799	2.4737e+06	838269	1.16673e+06	2.28938e+06	0	FALSE
QQLSAEELDAQLDAYNAR+0.000	tr|E9PB61|E9PB61_HUMAN;sp|Q86V81|THOC4_HUMAN	2.03882e+06	4.59332e+06	10022596	287774	13552164	22511984	0	FALSE
VGAGAPVYLAAVLEYLTAEILELAGNAAR+0.000	tr|H0YFX9|H0YFX9_HUMAN;tr|A0A3B3IS11|A0A3B3IS11_HUMAN;tr|A0A0U1RRH7|A0A0U1RRH7_HUMAN;tr|A0A0U1RR32|A0A0U1RR32_HUMAN;sp|Q9BTM1|H2AJ_HUMAN;sp|Q9BTM1-2|H2AJ_HUMAN;sp|P04908|H2A1B_HUMAN;sp|P20671|H2A1D_HUMAN;sp|P0C0S8|H2A1_HUMAN;sp|Q96KK5|H2A1H_HUMAN;sp|Q93077|H2A1C_HUMAN;sp|Q8IUE6|H2A2B_HUMAN;sp|Q99878|H2A1J_HUMAN;sp|Q7L7L0|H2A3_HUMAN;sp|P16104|H2AX_HUMAN	74656464	0	5.16173e+06	0	1.18903e+06	0	0.000829187	FALSE
IFANTPDSGC+57.021VLGMR+0.000	tr|F8VZI0|F8VZI0_HUMAN;tr|A0A2R8Y891|A0A2R8Y891_HUMAN;sp|P08237|PFKAM_HUMAN;sp|P08237-2|PFKAM_HUMAN;sp|P08237-3|PFKAM_HUMAN	11111119	4.00281e+06	27435878	2.67374e+06	20587628	32625792	0	FALSE
AC+57.021ANPAAGSVILLENLR+0.000	sp|P00558|PGK1_HUMAN;sp|P00558-2|PGK1_HUMAN	3.2667e+06	9771031	4930374	2.06805e+06	8.22759e+06	12854496	0	FALSE
IAIPGLAGAGNSVLLVSNLNPER+0.000	tr|K7EK45|K7EK45_HUMAN;tr|A0A0U1RRM4|A0A0U1RRM4_HUMAN;tr|A6NLN1|A6NLN1_HUMAN;sp|P26599|PTBP1_HUMAN;sp|P26599-2|PTBP1_HUMAN;sp|P26599-3|PTBP1_HUMAN	49761616	17268420	92971584	22826784	90334136	212346304	0	FALSE
DINAYNC+57.021EEPTEK+0.000LPFPIIDDR+0.000	sp|P30041|PRDX6_HUMAN	4.30548e+06	3.84926e+06	15048324	0	8736480	14024017	0	FALSE
ITNDFYPEEDGK+0.000TK+0.000	tr|C9JZG1|C9JZG1_HUMAN;sp|P55884|EIF3B_HUMAN;sp|P55884-2|EIF3B_HUMAN	9989022	5355864	22787306	1.58967e+06	23439354	41424624	0	FALSE
VGTGEPC+57.021C+57.021DWVGDEGAGHFVK+0.000	tr|K7EM49|K7EM49_HUMAN;tr|K7EPF6|K7EPF6_HUMAN;sp|P52209|6PGD_HUMAN;sp|P52209-2|6PGD_HUMAN	101280648	36593384	225403024	46484580	212580192	320472032	0	FALSE
ALSEIAGMTLPYDTLDQVR+0.000	tr|B4DJ81|B4DJ81_HUMAN;sp|P28331|NDUS1_HUMAN;sp|P28331-2|NDUS1_HUMAN;sp|P28331-3|NDUS1_HUMAN;sp|P28331-4|NDUS1_HUMAN;sp|P28331-5|NDUS1_HUMAN	6.17574e+06	3.99147e+06	12206837	0	13639806	16240200	0	FALSE
GHEGPVWQVAWAHPMYGNILASC+57.021SYDR+0.000K+0.000	tr|E7ERC8|E7ERC8_HUMAN;tr|A8MXL6|A8MXL6_HUMAN;sp|P55735|SEC13_HUMAN;sp|P55735-2|SEC13_HUMAN;sp|P55735-3|SEC13_HUMAN;sp|P55735-4|SEC13_HUMAN	9742400	7873565	30327380	3.72261e+06	29122776	61820780	0	FALSE
IC+57.021ELLPEAAINDVYLAPLLQC+57.021LIEGLSAEPR+0.000	tr|J3QKQ5|J3QKQ5_HUMAN;tr|J3KTM9|J3KTM9_HUMAN;sp|Q14974|IMB1_HUMAN;sp|Q14974-2|IMB1_HUMAN	25536508	3.0806e+06	7530470	36295092	0	31010390	0	FALSE
YLEVSEPQDIEC+57.021C+57.021GALEYYDK+0.000	tr|B0QYA5|B0QYA5_HUMAN;sp|O15371|EIF3D_HUMAN;sp|O15371-2|EIF3D_HUMAN;sp|O15371-3|EIF3D_HUMAN	3.52408e+06	12278930	7935224	6317095	11795436	19995460	0	FALSE
ASFNHFDK+0.000DHGGALGPEEFK+0.000	tr|F5GXS2|F5GXS2_HUMAN;sp|O43707|ACTN4_HUMAN;sp|O43707-2|ACTN4_HUMAN;sp|O43707-3|ACTN4_HUMAN	4703566	3849865	12607678	3.57778e+06	10967576	20071658	0	FALSE
IEYDTFGELK+0.000VPNDK+0.000YYGAQTVR+0.000	sp|P07954|FUMH_HUMAN;sp|P07954-2|FUMH_HUMAN	20312020	6.55041e+06	48833872	4848414	44956804	84073328	0	FALSE
LGDGLFLQC+57.021C+57.021EEVAELYPK+0.000	tr|A0A087X2E5|A0A087X2E5_HUMAN;tr|A0A087WZN1|A0A087WZN1_HUMAN;sp|O43837|IDH3B_HUMAN;sp|O43837-2|IDH3B_HUMAN;sp|O43837-3|IDH3B_HUMAN	2.28534e+06	477232	11719622	2.64139e+06	11548006	19758674	0	FALSE
LGLSTLGELK+0.000QNLSR+0.000	tr|A0A087WZ51|A0A087WZ51_HUMAN;tr|A0A087WYR3|A0A087WYR3_HUMAN;sp|O43399|TPD54_HUMAN;sp|O43399-2|TPD54_HUMAN;sp|O43399-3|TPD54_HUMAN;sp|O43399-4|TPD54_HUMAN;sp|O43399-5|TPD54_HUMAN;sp|O43399-6|TPD54_HUMAN;sp|O43399-7|TPD54_HUMAN	9192102	1496799	18413096	0	16677029	33502068	0	FALSE
SVVLYVILAPFDNEQSDLVHR+0.000	sp|O00232|PSD12_HUMAN;sp|O00232-2|PSD12_HUMAN	7.89774e+06	3.24983e+06	15141413	984954	14223142	32314038	0	FALSE
TQDPAK+0.000APNTPDILEIEFK+0.000K+0.000	sp|P00966|ASSY_HUMAN	34098520	14528107	77713784	8836266	78283512	97983800	0	FALSE
HIGYDDSSK+0.000GFDYK+0.000	sp|P31153|METK2_HUMAN;sp|P31153-2|METK2_HUMAN	2.50183e+06	1.32064e+06	4590604	0	12302287	20323518	0	FALSE
HVFWGSGSHTLPALLENLK+0.000	tr|G3V0E5|G3V0E5_HUMAN;sp|P02786|TFR1_HUMAN	8035029	2.74969e+06	19235054	5749985	28992276	66653400	0	FALSE
GIFPVLC+57.021K+0.000DPVQEAWAEDVDLR+0.000	tr|B4DNK4|B4DNK4_HUMAN;tr|H3BR70|H3BR70_HUMAN;sp|P14618|KPYM_HUMAN;sp|P14618-2|KPYM_HUMAN;sp|P14618-3|KPYM_HUMAN	372835264	231565792	1136649344	119062896	879271552	1596389760	0	FALSE
K+0.000GGISNILEELVVQPLLVSVSALTLATETVR+0.000	sp|P50991|TCPD_HUMAN;sp|P50991-2|TCPD_HUMAN	4.68807e+06	0	0	0	0	0	0.000829187	FALSE
NVLIFDLGGGTFDVSILTIEDGIFEVK+0.000	tr|E9PKE3|E9PKE3_HUMAN;tr|E9PN89|E9PN89_HUMAN;sp|P54652|HSP72_HUMAN;sp|P11142|HSP7C_HUMAN;sp|P11142-2|HSP7C_HUMAN	41349020	58436.6	3.87609e+06	0	398733	1.6034e+06	0.000829187	FALSE
GVNC+57.021IDYYSGGDK+0.000PYLISGADDR+0.000LVK+0.000	sp|P35606|COPB2_HUMAN;sp|P35606-2|COPB2_HUMAN	12168347	12937611	11507094	2.58008e+06	11736012	26427302	0	FALSE
AAFDDAIAELDTLSEESYK+0.000DSTLIM+15.995QLLR+0.000	tr|K7EM20|K7EM20_HUMAN;sp|P62258|1433E_HUMAN;sp|P62258-2|1433E_HUMAN	7.99131e+06	4.09402e+06	9407458	1.68178e+06	9481845	19784974	0	FALSE
MK+0.000EIAEAYLGYPVTNAVITVPAYFNDSQR+0.000	tr|A0A0G2JIW1|A0A0G2JIW1_HUMAN;sp|P0DMV9|HS71B_HUMAN;sp|P0DMV8|HS71A_HUMAN	25219038	21751346	51198252	0	66176936	154506736	0	FALSE
DINAYNC+57.021EEPTEK+0.000LPFPIIDDR+0.000	sp|P30041|PRDX6_HUMAN	86225080	42608856	227309744	20220636	164361952	267980336	0	FALSE
SPFEVYVDK+0.000SQGDASK+0.000	tr|Q60FE5|Q60FE5_HUMAN;tr|F8WE98|F8WE98_HUMAN;tr|A0A087WWY3|A0A087WWY3_HUMAN;sp|P21333|FLNA_HUMAN;sp|P21333-2|FLNA_HUMAN	13819367	4622789	28026424	3.0638e+06	23758206	58595336	0	FALSE
K+0.000SLPEEDVAEIQHAEEFLIK+0.000PESK+0.000	tr|C9IYT0|C9IYT0_HUMAN;tr|H7C2Q9|H7C2Q9_HUMAN;tr|H7C0M1|H7C0M1_HUMAN;sp|O60832|DKC1_HUMAN;sp|O60832-2|DKC1_HUMAN	13799667	6693107	20172922	1.74362e+06	18491476	40529176	0.000829187	FALSE
GHEGPVWQVAWAHPMYGNILASC+57.021SYDR+0.000K+0.000	tr|E7ERC8|E7ERC8_HUMAN;tr|A8MXL6|A8MXL6_HUMAN;sp|P55735|SEC13_HUMAN;sp|P55735-2|SEC13_HUMAN;sp|P55735-3|SEC13_HUMAN;sp|P55735-4|SEC13_HUMAN	9008226	8.0534e+06	28483486	5053654	31027068	61168544	0	FALSE
IR+0.000ELESQISELQEDLESER+0.000	sp|P35579|MYH9_HUMAN	8630181	3.91812e+06	17004088	3171901	10261361	43877420	0	FALSE
LGEVVNTHGPVEPDK+0.000DNIR+0.000	tr|K7EN82|K7EN82_HUMAN;sp|P30419|NMT1_HUMAN;sp|P30419-2|NMT1_HUMAN	7.37295e+06	4.59375e+06	8393641	1.65028e+06	10315857	18589180	0	FALSE
NVLIFDLGGGTFDVSILTIEDGIFEVK+0.000	tr|E9PKE3|E9PKE3_HUMAN;tr|E9PN89|E9PN89_HUMAN;sp|P54652|HSP72_HUMAN;sp|P11142|HSP7C_HUMAN;sp|P11142-2|HSP7C_HUMAN	31435492	0	28053106	0	25001444	21490780	0.000829187	FALSE
M+15.995YSYVTEELPQLINANFPVDPQR+0.000	tr|H7BZT7|H7BZT7_HUMAN;tr|X6RA14|X6RA14_HUMAN;sp|P10768|ESTD_HUMAN	6.97299e+06	9348828	9244621	5827019	8088466	21929024	0	FALSE
VGAGAPVYLAAVLEYLTAEILELAGNAAR+0.000	tr|H0YFX9|H0YFX9_HUMAN;tr|A0A3B3IS11|A0A3B3IS11_HUMAN;tr|A0A0U1RRH7|A0A0U1RRH7_HUMAN;tr|A0A0U1RR32|A0A0U1RR32_HUMAN;sp|Q9BTM1|H2AJ_HUMAN;sp|Q9BTM1-2|H2AJ_HUMAN;sp|P04908|H2A1B_HUMAN;sp|P20671|H2A1D_HUMAN;sp|P0C0S8|H2A1_HUMAN;sp|Q96KK5|H2A1H_HUMAN;sp|Q93077|H2A1C_HUMAN;sp|Q8IUE6|H2A2B_HUMAN;sp|Q99878|H2A1J_HUMAN;sp|Q7L7L0|H2A3_HUMAN;sp|P16104|H2AX_HUMAN	151509568	0	10526350	0	1.55245e+06	0	0.000829187	FALSE
TPK+0.000GPSSVEDIK+0.000AK+0.000	sp|P06748|NPM_HUMAN;sp|P06748-2|NPM_HUMAN;sp|P06748-3|NPM_HUMAN	9599595	5364389	17518116	0	19713270	45002912	0	FALSE
IWC+57.021FGPDGTGPNILTDITK+0.000	sp|P13639|EF2_HUMAN	6.94134e+06	2.91209e+06	14671205	4814406	11572954	31852380	0	FALSE
GPLPLSSQHR+0.000GDADQASNILASFGLSAR+0.000	tr|A8MXP9|A8MXP9_HUMAN;tr|D6R991|D6R991_HUMAN;tr|D6REM6|D6REM6_HUMAN;tr|A0A0R4J2E8|A0A0R4J2E8_HUMAN;sp|P43243|MATR3_HUMAN	20630160	9891194	29543678	2552821	34234008	61241956	0	FALSE
QVLVAPGNAGTAC+57.021SEK+0.000	tr|C9JKQ7|C9JKQ7_HUMAN;tr|C9JZG2|C9JZG2_HUMAN;tr|C9JBJ1|C9JBJ1_HUMAN;tr|C9JTV6|C9JTV6_HUMAN;tr|F8WD69|F8WD69_HUMAN;sp|P22102|PUR2_HUMAN;sp|P22102-2|PUR2_HUMAN	51742084	4622548	38362012	11987060	42686300	62409692	0	FALSE
LM+15.995EPIYLVEIQC+57.021PEQVVGGIYGVLNR+0.000K+0.000	sp|P13639|EF2_HUMAN	7164752	4613813	16522184	4353084	17765326	31318738	0	FALSE
YASPEMC+57.021FVFSDR+0.000	tr|B4DEP1|B4DEP1_HUMAN;tr|A0A1W2PRX2|A0A1W2PRX2_HUMAN;tr|A0A096LP72|A0A096LP72_HUMAN;tr|A0A096LNY5|A0A096LNY5_HUMAN;tr|A0A1B0GTJ7|A0A1B0GTJ7_HUMAN;tr|A0A096LNY4|A0A096LNY4_HUMAN;tr|A0A1B0GWF8|A0A1B0GWF8_HUMAN;tr|A0A1B0GWJ0|A0A1B0GWJ0_HUMAN;tr|A0A1B0GTG9|A0A1B0GTG9_HUMAN;tr|A0A0A6YY92|A0A0A6YY92_HUMAN;sp|P30566|PUR8_HUMAN;sp|P30566-2|PUR8_HUMAN	12340132	4.5006e+06	26634630	0	20216020	36707448	0	FALSE
GGPEVQQVPAGER+0.000PLWFIC+57.021SGMGTQWR+0.000	tr|A0A0U1RQF0|A0A0U1RQF0_HUMAN;sp|P49327|FAS_HUMAN	42142196	33712956	106925512	5.26505e+06	69418880	93214536	0	FALSE
NLHQSGFSLSGAQIDDNIPR+0.000	tr|A0A1C7CYX9|A0A1C7CYX9_HUMAN;sp|Q16555|DPYL2_HUMAN;sp|Q16555-2|DPYL2_HUMAN	5367128	5.97053e+06	6065651	12870165	0	25855546	0	FALSE
ALVLDC+57.021HYPEDEVGQEDEAESDIFSIR+0.000	tr|I3L3Q7|I3L3Q7_HUMAN;tr|I3L3B0|I3L3B0_HUMAN;sp|Q07021|C1QBP_HUMAN	210543696	67234096	568737536	107706312	588769664	992718592	0	FALSE
DEFEGLFK+0.000QPAENVNQYLTDPK+0.000	tr|Q5JRR6|Q5JRR6_HUMAN;sp|P22314|UBA1_HUMAN;sp|P22314-2|UBA1_HUMAN	28172234	13617190	70456056	11538805	51060280	91305728	0	FALSE
TYEEGLK+0.000HEANNPQLK+0.000EGLQNM+15.995EAR+0.000	tr|F5GXD8|F5GXD8_HUMAN;tr|F5H783|F5H783_HUMAN;sp|P31948|STIP1_HUMAN;sp|P31948-2|STIP1_HUMAN	10650192	6964562	16794778	0	10508526	14227404	0	FALSE
K+0.000DDPVTNLNNAFEVAEK+0.000	tr|K7EJH8|K7EJH8_HUMAN;sp|O43707|ACTN4_HUMAN	14705911	6503174	32011204	4.27082e+06	24482784	54453604	0	FALSE
VNQIGSVTESIQAC+57.021K+0.000	sp|P13929|ENOB_HUMAN;sp|P13929-2|ENOB_HUMAN;sp|P13929-3|ENOB_HUMAN	8487739	4.4115e+06	25776270	3.01031e+06	19850278	37714748	0	FALSE
VNQIGSVTESLQAC+57.021K+0.000	tr|A0A2R8Y6G6|A0A2R8Y6G6_HUMAN;sp|P06733|ENOA_HUMAN;sp|P06733-2|ENOA_HUMAN	8487739	4.4115e+06	25776270	3.01031e+06	19850278	37714748	0	FALSE
K+0.000FYGPEGPYGVFAGR+0.000	sp|O00264|PGRC1_HUMAN	20918926	16135058	39766108	629459	37119780	93872552	0	FALSE
TPALVNAAVTYSK+0.000PR+0.000	tr|A0A3B3ITX4|A0A3B3ITX4_HUMAN;tr|E9PN17|E9PN17_HUMAN;tr|A0A3B3IRW3|A0A3B3IRW3_HUMAN;sp|O75964|ATP5L_HUMAN	89434168	30904334	169467440	17015014	192564288	384114144	0	FALSE
TAAQC+57.021LEHYEFLLDK+0.000	sp|Q99459|CDC5L_HUMAN	17248506	6663891	35920376	6.54497e+06	40507388	87160112	0	FALSE
IMLFTNEDNPHGNDSAK+0.000	tr|B1AHC9|B1AHC9_HUMAN;sp|P12956|XRCC6_HUMAN;sp|P12956-2|XRCC6_HUMAN	10990160	267721	19719078	3.65915e+06	18804704	31895664	0	FALSE
IPSAVGYQPTLATDM+15.995GTMQER+0.000	tr|F8W0P7|F8W0P7_HUMAN;tr|F8W079|F8W079_HUMAN;tr|H0YH81|H0YH81_HUMAN;tr|H0YI37|H0YI37_HUMAN;sp|P06576|ATPB_HUMAN	6.09074e+06	3.28649e+06	18809218	18251.7	15631524	35851832	0	FALSE
AEGPEVDVNLPK+0.000ADVDISGPK+0.000	sp|Q09666|AHNK_HUMAN;sp|Q09666|AHNK_HUMAN	35392048	13941640	40800232	9570810	43846244	48754696	0	FALSE
R+0.000MPQAPPSLC+57.021VTPYPEPSEC+57.021SWK+0.000DPEAEAALELALSITR+0.000	tr|A0A140T936|A0A140T936_HUMAN;sp|P26640|SYVC_HUMAN	11615443	5.52421e+06	33652468	9440479	22290944	37714920	0	FALSE
GVNC+57.021IDYYSGGDK+0.000PYLISGADDR+0.000LVK+0.000	sp|P35606|COPB2_HUMAN;sp|P35606-2|COPB2_HUMAN	1.55323e+06	971824	5.06391e+06	461703	10960729	26606148	0	FALSE
K+0.000GGISNILEELVVQPLLVSVSALTLATETVR+0.000	sp|P50991|TCPD_HUMAN;sp|P50991-2|TCPD_HUMAN	4.49572e+06	0	0	0	0	0	0.000829187	FALSE
LQSGAWGC+57.021C+57.021PFTQAVC+57.021C+57.021EDHIHC+57.021C+57.021PAGFTC+57.021DTQK+0.000	tr|K7EKL3|K7EKL3_HUMAN;sp|P28799|GRN_HUMAN;sp|P28799-2|GRN_HUMAN;sp|P28799-3|GRN_HUMAN	1.53947e+06	16363799	15041218	17503406	24391178	52523820	0	FALSE
ELNIDVADVESLLVQC+57.021ILDNTIHGR+0.000	tr|B4DIH5|B4DIH5_HUMAN;sp|P61201|CSN2_HUMAN;sp|P61201-2|CSN2_HUMAN	2777001	1.92849e+06	8.23836e+06	874596	8.05884e+06	14351990	0	FALSE
GIFPVLC+57.021K+0.000DPVQEAWAEDVDLR+0.000	tr|B4DNK4|B4DNK4_HUMAN;tr|H3BR70|H3BR70_HUMAN;sp|P14618|KPYM_HUMAN;sp|P14618-2|KPYM_HUMAN;sp|P14618-3|KPYM_HUMAN	381744768	231721936	1132479360	86865440	879809088	1605489792	0	FALSE
ITK+0.000PGSIDSNNQLFAPGGR+0.000	tr|E9PGM1|E9PGM1_HUMAN;tr|E7EX73|E7EX73_HUMAN;tr|E7EUU4|E7EUU4_HUMAN;sp|Q04637|IF4G1_HUMAN;sp|Q04637-3|IF4G1_HUMAN;sp|Q04637-4|IF4G1_HUMAN;sp|Q04637-5|IF4G1_HUMAN;sp|Q04637-6|IF4G1_HUMAN;sp|Q04637-7|IF4G1_HUMAN;sp|Q04637-8|IF4G1_HUMAN;sp|Q04637-9|IF4G1_HUMAN	5907662	3.6566e+06	10300665	0	16831518	39084016	0	FALSE
AGVYPEK+0.000DQAENEDGAQENTFSMDPQLER+0.000	sp|P50570|DYN2_HUMAN;sp|P50570-2|DYN2_HUMAN;sp|P50570-3|DYN2_HUMAN;sp|P50570-4|DYN2_HUMAN;sp|P50570-5|DYN2_HUMAN	14595168	8166412	23815146	5.11411e+06	19802086	37728796	0	FALSE
GIFPVLC+57.021K+0.000DPVQEAWAEDVDLR+0.000	tr|B4DNK4|B4DNK4_HUMAN;tr|H3BR70|H3BR70_HUMAN;sp|P14618|KPYM_HUMAN;sp|P14618-2|KPYM_HUMAN;sp|P14618-3|KPYM_HUMAN	13628003	6869361	50180828	3.12017e+06	37539448	70270528	0	FALSE
TQLASWSDPTEETGPVAGILDTETLEK+0.000	tr|H0YDN1|H0YDN1_HUMAN;sp|Q15149|PLEC_HUMAN;sp|Q15149-2|PLEC_HUMAN;sp|Q15149-3|PLEC_HUMAN;sp|Q15149-4|PLEC_HUMAN;sp|Q15149-5|PLEC_HUMAN;sp|Q15149-6|PLEC_HUMAN;sp|Q15149-7|PLEC_HUMAN;sp|Q15149-8|PLEC_HUMAN;sp|Q15149-9|PLEC_HUMAN	44399076	11023762	78638784	27089812	88938712	187341920	0	FALSE
K+0.000VTEENK+0.000ELANELR+0.000	sp|P07996|TSP1_HUMAN;sp|P07996-2|TSP1_HUMAN	27188290	5626.44	0	312524	0	0	0.000829187	FALSE
GNFGGSFAGSFGGAGGHAPGVAR+0.000	tr|A0A087X0X3|A0A087X0X3_HUMAN;tr|M0R2I7|M0R2I7_HUMAN;tr|M0QY96|M0QY96_HUMAN;sp|P52272|HNRPM_HUMAN;sp|P52272-2|HNRPM_HUMAN	51009984	17037142	99322328	5.59943e+06	114466144	233528512	0	FALSE
YIYDQC+57.021PAVAGYGPIEQLPDYNR+0.000	sp|P31930|QCR1_HUMAN	89967056	16535040	170509888	0	156127168	297592256	0	FALSE
NVLIFDLGGGTFDVSILTIEDGIFEVK+0.000	tr|E9PKE3|E9PKE3_HUMAN;tr|E9PN89|E9PN89_HUMAN;sp|P54652|HSP72_HUMAN;sp|P11142|HSP7C_HUMAN;sp|P11142-2|HSP7C_HUMAN	36616288	0	2.26097e+06	2.7344e+06	609012	1548111	0.000829187	FALSE
FSPDSTLLATC+57.021SADQTC+57.021K+0.000	tr|H3BSZ4|H3BSZ4_HUMAN;tr|A0A0A0MR05|A0A0A0MR05_HUMAN;sp|Q9BVC4|LST8_HUMAN;sp|Q9BVC4-3|LST8_HUMAN;sp|Q9BVC4-5|LST8_HUMAN	1.71251e+06	1.78189e+06	6.92995e+06	985834	8.21158e+06	16434894	0	FALSE
GPGQVPTATSALSLELQEVEPLGLPQASPSR+0.000	sp|Q6P2E9|EDC4_HUMAN;sp|Q6P2E9-2|EDC4_HUMAN	2.31916e+06	414924	6823115	1.83811e+06	7.55853e+06	18336774	0	FALSE
VFPGSTTEDYNLIVIER+0.000	tr|M0R0K9|M0R0K9_HUMAN;sp|Q13263|TIF1B_HUMAN;sp|Q13263-2|TIF1B_HUMAN	41173604	19289318	76027168	21042196	79772856	180226368	0	FALSE
IDATQVEVNPFGETPEGQVVC+57.021FDAK+0.000	tr|E9PDQ8|E9PDQ8_HUMAN;sp|Q96I99|SUCB2_HUMAN;sp|Q96I99-2|SUCB2_HUMAN	3.06362e+06	1.07268e+06	6541406	1.36293e+06	4.53125e+06	8.02349e+06	0	FALSE
MK+0.000EIAEAYLGYPVTNAVITVPAYFNDSQR+0.000	tr|A0A0G2JIW1|A0A0G2JIW1_HUMAN;sp|P0DMV9|HS71B_HUMAN;sp|P0DMV8|HS71A_HUMAN	14084526	17132030	26409072	7467160	31880100	64756624	0	FALSE
K+0.000LFVGGIK+0.000EDTEEHHLR+0.000DYFEEYGK+0.000IDTIEIITDR+0.000	tr|A0A087WUI2|A0A087WUI2_HUMAN;sp|P22626|ROA2_HUMAN;sp|P22626-2|ROA2_HUMAN	16103656	9503664	40638124	5.79731e+06	44476600	73094208	0	FALSE
GNFTLPEVAEC+57.021FDEITYVELQK+0.000EEAQK+0.000LLEQYK+0.000EESK+0.000	tr|A0A1W2PQL0|A0A1W2PQL0_HUMAN;tr|A0A1W2PQD4|A0A1W2PQD4_HUMAN;tr|A0A1W2PP34|A0A1W2PP34_HUMAN;tr|Q5RI18|Q5RI18_HUMAN;tr|A0A1W2PPH7|A0A1W2PPH7_HUMAN;tr|A0A1W2PP35|A0A1W2PP35_HUMAN;tr|A0A1W2PPL4|A0A1W2PPL4_HUMAN;tr|A0A1W2PPS1|A0A1W2PPS1_HUMAN;tr|A0A1X7SBS1|A0A1X7SBS1_HUMAN;sp|Q00839|HNRPU_HUMAN;sp|Q00839-2|HNRPU_HUMAN	18401870	10186153	64243556	1.88944e+06	68804912	141004016	0	FALSE
ISMSEVDLNVAAPK+0.000	sp|Q09666|AHNK_HUMAN	12166278	8.02563e+06	34702952	4.81592e+06	31589106	53692364	0	FALSE
MGLVDQLVEPLGPGLK+0.000PPEER+0.000	tr|H0YFD6|H0YFD6_HUMAN;tr|A0A2R8Y4F5|A0A2R8Y4F5_HUMAN;tr|A0A2R8YG21|A0A2R8YG21_HUMAN;tr|A0A2R8Y688|A0A2R8Y688_HUMAN;sp|P40939|ECHA_HUMAN	10552123	3139411	19945016	1.7592e+06	23658676	46546488	0	FALSE
YEQGFITDPVVLSPK+0.000	tr|H0Y4R1|H0Y4R1_HUMAN;tr|E7ETK5|E7ETK5_HUMAN;sp|P12268|IMDH2_HUMAN	25152190	10196704	53709772	8679227	35667508	86959808	0	FALSE
LSYLEEAVMHLDHSDPITR+0.000	tr|I3L3M2|I3L3M2_HUMAN;tr|I3L0V0|I3L0V0_HUMAN;sp|Q6P2E9|EDC4_HUMAN;sp|Q6P2E9-2|EDC4_HUMAN	1.03291e+06	0	2550222	247146	4.56031e+06	10789025	0	FALSE
TWIEGLTGLSIGPDFQK+0.000	tr|B4DUT8|B4DUT8_HUMAN;tr|K7ES69|K7ES69_HUMAN;tr|A0A087X271|A0A087X271_HUMAN;tr|B4DDF4|B4DDF4_HUMAN;sp|Q99439|CNN2_HUMAN;sp|Q99439-2|CNN2_HUMAN	20103490	9764670	33454736	8526815	35078684	88151352	0	FALSE
YR+0.000C+57.021ELLYEGPPDDEAAM+15.995GIK+0.000	sp|P13639|EF2_HUMAN	7.38492e+06	3.54864e+06	11814254	0	13014872	36100064	0	FALSE
EIFDIAFPDEQAEALAVER+0.000	tr|K7EJE8|K7EJE8_HUMAN;tr|K7EKE6|K7EKE6_HUMAN;sp|P36776|LONM_HUMAN;sp|P36776-2|LONM_HUMAN;sp|P36776-3|LONM_HUMAN	16709660	6348747	29983318	2311983	29217250	45629196	0	FALSE
GIAYIEFK+0.000TEADAEK+0.000TFEEK+0.000QGTEIDGR+0.000	tr|H7BY16|H7BY16_HUMAN;sp|P19338|NUCL_HUMAN	5.96444e+06	9320532	24011868	3.19781e+06	22585364	39215080	0.000209315	FALSE
LIQSHPESAEDLQEK+0.000	tr|A0A0D9SF54|A0A0D9SF54_HUMAN;tr|A0A0D9SGF6|A0A0D9SGF6_HUMAN;sp|Q13813|SPTN1_HUMAN;sp|Q13813-2|SPTN1_HUMAN;sp|Q13813-3|SPTN1_HUMAN	3815997	3.30278e+06	15100942	2.17424e+06	14871092	30516172	0	FALSE
VGAGAPVYLAAVLEYLTAEILELAGNAAR+0.000	tr|H0YFX9|H0YFX9_HUMAN;tr|A0A3B3IS11|A0A3B3IS11_HUMAN;tr|A0A0U1RRH7|A0A0U1RRH7_HUMAN;tr|A0A0U1RR32|A0A0U1RR32_HUMAN;sp|Q9BTM1|H2AJ_HUMAN;sp|Q9BTM1-2|H2AJ_HUMAN;sp|P04908|H2A1B_HUMAN;sp|P20671|H2A1D_HUMAN;sp|P0C0S8|H2A1_HUMAN;sp|Q96KK5|H2A1H_HUMAN;sp|Q93077|H2A1C_HUMAN;sp|Q8IUE6|H2A2B_HUMAN;sp|Q99878|H2A1J_HUMAN;sp|Q7L7L0|H2A3_HUMAN;sp|P16104|H2AX_HUMAN	7.42753e+06	290669	286886	0	0	0	0.000829187	FALSE
TDITYPAGFMDVISIDK+0.000	sp|P62701|RS4X_HUMAN	42813032	14220032	83512560	17032078	67782120	137387840	0	FALSE
YADLTEDQLPSC+57.021ESLK+0.000DTIAR+0.000	sp|P18669|PGAM1_HUMAN	64316232	37146000	188958832	32160482	168532240	319841568	0	FALSE
AEPEAGEEQAGDDR+0.000DSGGPVLQFDYEAVANR+0.000	sp|P56182|RRP1_HUMAN	3.74442e+06	0	10328101	0	10641269	20637062	0	FALSE
SEWGSLLEELVAEGK+0.000	sp|P17858|PFKAL_HUMAN;sp|P17858-2|PFKAL_HUMAN	96316672	108633136	92549776	89449112	159273248	233963552	0	FALSE
LQAALDDEEAGGR+0.000PAM+15.995EPGNGSLDLGGDSAGR+0.000	tr|A0A1W2PPS1|A0A1W2PPS1_HUMAN;tr|A0A1X7SBS1|A0A1X7SBS1_HUMAN;sp|Q00839|HNRPU_HUMAN;sp|Q00839-2|HNRPU_HUMAN	35108760	27493144	67035752	7.27489e+06	75281080	176196352	0	FALSE
EIVLADVIDNDSWR+0.000	tr|D6RF62|D6RF62_HUMAN;tr|E9PBS1|E9PBS1_HUMAN;sp|P22234|PUR6_HUMAN;sp|P22234-2|PUR6_HUMAN	7413272	4792715	13810822	0	18911784	18154916	0	FALSE
R+0.000DNYVPEVSALDQEIIEVDPDTK+0.000EMLK+0.000	tr|A0A075B716|A0A075B716_HUMAN;tr|H3BNC9|H3BNC9_HUMAN;tr|H0YN88|H0YN88_HUMAN;sp|P08708|RS17_HUMAN	18875850	11429500	48397936	7633230	36189240	76397328	0	FALSE
LSDC+57.021GLGDLAITSLLLLNQC+57.021LEELQGVR+0.000	tr|A0A3B3IUD7|A0A3B3IUD7_HUMAN;sp|Q14690|RRP5_HUMAN	4.06758e+06	2.28475e+06	4542847	1.05786e+06	5128339	9302292	0	FALSE
VGAGAPVYLAAVLEYLTAEILELAGNAAR+0.000	tr|H0YFX9|H0YFX9_HUMAN;tr|A0A3B3IS11|A0A3B3IS11_HUMAN;tr|A0A0U1RRH7|A0A0U1RRH7_HUMAN;tr|A0A0U1RR32|A0A0U1RR32_HUMAN;sp|Q9BTM1|H2AJ_HUMAN;sp|Q9BTM1-2|H2AJ_HUMAN;sp|P04908|H2A1B_HUMAN;sp|P20671|H2A1D_HUMAN;sp|P0C0S8|H2A1_HUMAN;sp|Q96KK5|H2A1H_HUMAN;sp|Q93077|H2A1C_HUMAN;sp|Q8IUE6|H2A2B_HUMAN;sp|Q99878|H2A1J_HUMAN;sp|Q7L7L0|H2A3_HUMAN;sp|P16104|H2AX_HUMAN	150565072	50247.3	8391205	0	443082	165554	0.000829187	FALSE
K+0.000GGISNILEELVVQPLLVSVSALTLATETVR+0.000	sp|P50991|TCPD_HUMAN;sp|P50991-2|TCPD_HUMAN	4.01619e+06	1.3879e+06	780041	0	1.74582e+06	0	0.000829187	FALSE
NEEQMK+0.000LPAEGPEPEADSQEQVHPK+0.000	sp|O75459|PAGE1_HUMAN	30274664	18840310	55566252	21498554	70167368	113423864	0	FALSE
GVNIGGAGSYIYEK+0.000PLAEGPQVTGPIEVPAAR+0.000	tr|H0YFA4|H0YFA4_HUMAN;sp|P52943|CRIP2_HUMAN;sp|P52943-2|CRIP2_HUMAN	1.76874e+06	0	3.60163e+06	0	2.62734e+06	10460311	0	FALSE
QLFHPEQLITGK+0.000EDAANNYAR+0.000	tr|C9J2C0|C9J2C0_HUMAN;tr|C9JQ00|C9JQ00_HUMAN;tr|C9JJQ8|C9JJQ8_HUMAN;tr|C9JDL2|C9JDL2_HUMAN;tr|C9JEV8|C9JEV8_HUMAN;tr|F8VVB9|F8VVB9_HUMAN;tr|F8VRZ4|F8VRZ4_HUMAN;tr|C9K0S6|C9K0S6_HUMAN;tr|F5H5D3|F5H5D3_HUMAN;tr|F8VWV9|F8VWV9_HUMAN;tr|F8VQQ4|F8VQQ4_HUMAN;tr|F8VX09|F8VX09_HUMAN;tr|A0A1W2PQM2|A0A1W2PQM2_HUMAN;tr|F8VS66|F8VS66_HUMAN;sp|P68363|TBA1B_HUMAN;sp|P68363-2|TBA1B_HUMAN;sp|Q9NY65|TBA8_HUMAN;sp…	217243776	100207016	483067168	83498608	446058752	980148736	0	FALSE
K+0.000GGISNILEELVVQPLLVSVSALTLATETVR+0.000	sp|P50991|TCPD_HUMAN;sp|P50991-2|TCPD_HUMAN	4.13771e+06	1384659	856322	629446	1778732	0	0.000829187	FALSE
SGDAAIVDMVPGK+0.000PM+15.995C+57.021VESFSDYPPLGR+0.000	tr|A0A087WVQ9|A0A087WVQ9_HUMAN;sp|Q5VTE0|EF1A3_HUMAN;sp|P68104|EF1A1_HUMAN;sp|P68104-2|EF1A1_HUMAN	1.27239e+06	335684	2.27655e+06	598051	2.34389e+06	3.71694e+06	0	FALSE
SEPVK+0.000EESSELEQPFAQDTSSVGPDR+0.000	sp|Q15424|SAFB1_HUMAN;sp|Q15424-2|SAFB1_HUMAN;sp|Q15424-3|SAFB1_HUMAN;sp|Q15424-4|SAFB1_HUMAN;sp|Q14151|SAFB2_HUMAN	8.33727e+06	927026	11887313	0	12974549	24124576	0	FALSE
YESLTDPSK+0.000LDSGK+0.000ELK+0.000	sp|P08238|HS90B_HUMAN;sp|Q58FF8|H90B2_HUMAN;sp|Q58FF7|H90B3_HUMAN	39950388	19397442	91435224	6674798	74473392	169599856	0	FALSE
ELLQSFDSALQSVK+0.000	sp|P49792|RBP2_HUMAN	18762684	7.46928e+06	44210216	6554050	46737248	90632088	0	FALSE
YLEVSEPQDIEC+57.021C+57.021GALEYYDK+0.000	tr|B0QYA5|B0QYA5_HUMAN;sp|O15371|EIF3D_HUMAN;sp|O15371-2|EIF3D_HUMAN;sp|O15371-3|EIF3D_HUMAN	8433467	2.28416e+06	8751321	3.87978e+06	12318654	21500724	0	FALSE
GQNLLLTNLQTIQGILER+0.000	sp|P12270|TPR_HUMAN	3.03008e+06	1.04827e+06	4.64158e+06	1687322	6.61692e+06	14882323	0	FALSE
K+0.000GYEVIYLTEPVDEYC+57.021IQALPEFDGK+0.000R+0.000	sp|P14625|ENPL_HUMAN	82854224	45824420	264059632	28657408	221493616	350112448	0	FALSE
QVTQSYWDTNPTR+0.000	sp|P07996|TSP1_HUMAN;sp|P07996-2|TSP1_HUMAN	34343892	1.41422e+06	0	3560701	0	435674	0.000829187	FALSE
VIHDNFGIVEGLMTTVHAITATQK+0.000	tr|E7EUT5|E7EUT5_HUMAN;sp|P04406|G3P_HUMAN;sp|P04406-2|G3P_HUMAN	26679116	18843702	49721888	25520164	44151608	111513464	0	FALSE
VIHDNFGIVEGLM+15.995TTVHAITATQK+0.000	tr|E7EUT5|E7EUT5_HUMAN;sp|P04406|G3P_HUMAN;sp|P04406-2|G3P_HUMAN	10703969	2283729	16702978	3.939e+06	10024494	23862088	0	FALSE
EIVLADVIDNDSWR+0.000	tr|D6RF62|D6RF62_HUMAN;tr|E9PBS1|E9PBS1_HUMAN;sp|P22234|PUR6_HUMAN;sp|P22234-2|PUR6_HUMAN	16808230	7.64732e+06	41336460	6.60503e+06	43040596	41126132	0	FALSE
AMGVVVATGVNTEIGK+0.000	tr|H7C5W9|H7C5W9_HUMAN;sp|P16615|AT2A2_HUMAN;sp|P16615-2|AT2A2_HUMAN;sp|P16615-3|AT2A2_HUMAN;sp|P16615-4|AT2A2_HUMAN;sp|P16615-5|AT2A2_HUMAN	3.04939e+06	2115393	7040673	864999	6893538	15366658	0	FALSE
ISMPDFDLHLK+0.000GPK+0.000	sp|Q09666|AHNK_HUMAN	21851898	7968603	38390624	4626611	40223656	65211912	0	FALSE
AAVPSGASTGIYEALELR+0.000	tr|E5RI09|E5RI09_HUMAN;tr|K7ERS8|K7ERS8_HUMAN;tr|K7EM90|K7EM90_HUMAN;tr|A0A2R8Y798|A0A2R8Y798_HUMAN;tr|A0A2R8YEG5|A0A2R8YEG5_HUMAN;tr|A0A2R8Y879|A0A2R8Y879_HUMAN;tr|A0A2R8Y6G6|A0A2R8Y6G6_HUMAN;tr|E5RGZ4|E5RGZ4_HUMAN;tr|A0A2R8YEM5|A0A2R8YEM5_HUMAN;tr|E5RG95|E5RG95_HUMAN;tr|K7EKN2|K7EKN2_HUMAN;tr|F5H0C8|F5H0C8_HUMAN;tr|K7EPM1|K7EPM1_HUMAN;tr|F5H1C3|F5H1C3_HUMAN;sp|P13929|ENOB_HUMAN;sp|P13929-2|ENOB…	29700292	30634124	15111060	39446048	39032672	30357318	0	FALSE
DINAYNC+57.021EEPTEK+0.000LPFPIIDDR+0.000	sp|P30041|PRDX6_HUMAN	4.30608e+06	3.84946e+06	15047817	0	8736503	14023949	0	FALSE
VLK+0.000EVEAVIPDHC+57.021IFASNTSALPISEIAAVSK+0.000R+0.000PEK+0.000	tr|H0YFD6|H0YFD6_HUMAN;tr|A0A2R8Y4F5|A0A2R8Y4F5_HUMAN;sp|P40939|ECHA_HUMAN	1.85852e+06	0	2367700	0	3.27473e+06	6749894	0	FALSE
NQLTSNPENTVFDAK+0.000R+0.000	sp|P11021|BIP_HUMAN	5.22088e+06	3467467	23083380	0	22342372	35868140	0	FALSE
SNLVDNTNQVEVLQR+0.000	tr|H3BN59|H3BN59_HUMAN;tr|H3BMQ5|H3BMQ5_HUMAN;tr|H3BTB3|H3BTB3_HUMAN;tr|I3L0H8|I3L0H8_HUMAN;tr|H3BQK0|H3BQK0_HUMAN;tr|F6QDS0|F6QDS0_HUMAN;sp|Q9NUU7|DD19A_HUMAN;sp|Q9UMR2|DD19B_HUMAN;sp|Q9UMR2-2|DD19B_HUMAN;sp|Q9UMR2-4|DD19B_HUMAN	4467663	1.65577e+06	9982535	2.12102e+06	9093723	20794330	0	FALSE
VANVSAAEDSVSQR+0.000	tr|G3V0G3|G3V0G3_HUMAN;tr|H7C3E9|H7C3E9_HUMAN;tr|F8WDT8|F8WDT8_HUMAN;sp|Q9NY93|DDX56_HUMAN;sp|Q9NY93-2|DDX56_HUMAN	18981722	7.95146e+06	37057216	793533	36795640	78058904	0	FALSE
GTMLGK+0.000IEFEGQPVDFVDPNK+0.000QNLIAEVSTK+0.000	tr|Q5R211|Q5R211_HUMAN;sp|P31327|CPSM_HUMAN;sp|P31327-3|CPSM_HUMAN	12593256	6835956	38099296	6717737	54483444	73968480	0	FALSE
YLEVSEPQDIEC+57.021C+57.021GALEYYDK+0.000	tr|B0QYA5|B0QYA5_HUMAN;sp|O15371|EIF3D_HUMAN;sp|O15371-2|EIF3D_HUMAN;sp|O15371-3|EIF3D_HUMAN	5.59476e+06	3.79275e+06	16136482	3.79326e+06	15579048	30967768	0	FALSE
NVLIFDLGGGTFDVSILTIEDGIFEVK+0.000	tr|E9PKE3|E9PKE3_HUMAN;tr|E9PN89|E9PN89_HUMAN;sp|P54652|HSP72_HUMAN;sp|P11142|HSP7C_HUMAN;sp|P11142-2|HSP7C_HUMAN	30390464	0	7.173e+06	11899834	0	2946502	0.000829187	FALSE
AFTGFIVEADTPGIQIGR+0.000	tr|Q5T4U5|Q5T4U5_HUMAN;tr|B7Z9I1|B7Z9I1_HUMAN;sp|P11310|ACADM_HUMAN;sp|P11310-2|ACADM_HUMAN	15467788	7609917	29912070	668428	29235622	34849876	0	FALSE
ILHTLLASGEDALDFTQESEPSYISDVGPPGR+0.000	tr|H3BM93|H3BM93_HUMAN;tr|H3BMX0|H3BMX0_HUMAN;tr|H3BP95|H3BP95_HUMAN;tr|H3BVG0|H3BVG0_HUMAN;sp|Q8N1F7|NUP93_HUMAN;sp|Q8N1F7-2|NUP93_HUMAN	7357992	1.82809e+06	18459858	4.00535e+06	18280110	30842232	0	FALSE
MAPALSGANLTSPR+0.000	sp|Q9UQ35|SRRM2_HUMAN	30530690	7471474	55559832	4.09054e+06	77087960	140101248	0	FALSE
ALEQQVEEMK+0.000TQLEELEDELQATEDAK+0.000	sp|P35579|MYH9_HUMAN;sp|P35579-2|MYH9_HUMAN	12677479	6.47919e+06	30456102	7734228	40433852	73829000	0	FALSE
R+0.000DNYVPEVSALDQEIIEVDPDTK+0.000EMLK+0.000	tr|A0A075B716|A0A075B716_HUMAN;tr|H3BNC9|H3BNC9_HUMAN;tr|H0YN88|H0YN88_HUMAN;sp|P08708|RS17_HUMAN	20493958	11254156	48154204	7.74556e+06	36197636	76474376	0	FALSE
DGNASGTTLLEALDC+57.021ILPPTR+0.000PTDK+0.000PLR+0.000LPLQDVYK+0.000	tr|A0A087WV01|A0A087WV01_HUMAN;tr|A0A087WVQ9|A0A087WVQ9_HUMAN;sp|Q5VTE0|EF1A3_HUMAN;sp|P68104|EF1A1_HUMAN;sp|P68104-2|EF1A1_HUMAN	21159648	18353454	61823792	15768744	42978440	85848616	0	FALSE
EYR+0.000DLTTAGAVTQC+57.021YR+0.000	tr|M0R1A7|M0R1A7_HUMAN;tr|M0R117|M0R117_HUMAN;tr|M0R0P7|M0R0P7_HUMAN;tr|M0R3D6|M0R3D6_HUMAN;sp|Q02543|RL18A_HUMAN	8509307	6.3307e+06	27055180	1.38676e+06	20412308	39222864	0	FALSE
YGDLLPADGILIQGNDLK+0.000	sp|P23634|AT2B4_HUMAN;sp|P23634-2|AT2B4_HUMAN;sp|P23634-3|AT2B4_HUMAN;sp|P23634-4|AT2B4_HUMAN;sp|P23634-5|AT2B4_HUMAN;sp|P23634-6|AT2B4_HUMAN;sp|P23634-7|AT2B4_HUMAN;sp|P23634-8|AT2B4_HUMAN;sp|P20020|AT2B1_HUMAN;sp|P20020-1|AT2B1_HUMAN;sp|P20020-2|AT2B1_HUMAN;sp|P20020-4|AT2B1_HUMAN;sp|P20020-5|AT2B1_HUMAN;sp|P20020-6|AT2B1_HUMAN	4352721	2.71992e+06	10602901	6.53882e+06	7.80615e+06	26424504	0	FALSE
MQHLNPDPQLIPEQITTDITPEC+57.021LVSPR+0.000	tr|A0A0U1RRM8|A0A0U1RRM8_HUMAN;tr|H0YJ34|H0YJ34_HUMAN;tr|H0YJB6|H0YJB6_HUMAN;sp|Q96AC1|FERM2_HUMAN;sp|Q96AC1-2|FERM2_HUMAN;sp|Q96AC1-3|FERM2_HUMAN	24095770	3.8502e+06	50593832	7.78343e+06	26571648	79469160	0	FALSE
NSLWHTGDTSDQVR+0.000	tr|E7ES19|E7ES19_HUMAN;sp|P35443|TSP4_HUMAN	13782632	0	1.0941e+06	737557	1.4405e+06	0	0.000829187	FALSE
SPYQEFTDHLVK+0.000	tr|E9PQD7|E9PQD7_HUMAN;tr|H0YEN5|H0YEN5_HUMAN;sp|P15880|RS2_HUMAN	118129976	44809028	228502976	43392192	198314576	387653600	0	FALSE
VGAGAPVYLAAVLEYLTAEILELAGNAAR+0.000	tr|H0YFX9|H0YFX9_HUMAN;tr|A0A3B3IS11|A0A3B3IS11_HUMAN;tr|A0A0U1RRH7|A0A0U1RRH7_HUMAN;tr|A0A0U1RR32|A0A0U1RR32_HUMAN;sp|Q9BTM1|H2AJ_HUMAN;sp|Q9BTM1-2|H2AJ_HUMAN;sp|P04908|H2A1B_HUMAN;sp|P20671|H2A1D_HUMAN;sp|P0C0S8|H2A1_HUMAN;sp|Q96KK5|H2A1H_HUMAN;sp|Q93077|H2A1C_HUMAN;sp|Q8IUE6|H2A2B_HUMAN;sp|Q99878|H2A1J_HUMAN;sp|Q7L7L0|H2A3_HUMAN;sp|P16104|H2AX_HUMAN	77358800	0	4842013	0	1.74702e+06	0	0.000829187	FALSE
MFVGGLSWDTSK+0.000K+0.000	tr|D6R9P3|D6R9P3_HUMAN;tr|D6RBZ0|D6RBZ0_HUMAN;tr|D6RD18|D6RD18_HUMAN;sp|Q99729|ROAA_HUMAN;sp|Q99729-2|ROAA_HUMAN;sp|Q99729-3|ROAA_HUMAN;sp|Q99729-4|ROAA_HUMAN	9923445	5018309	28134690	4.11927e+06	20198546	42292304	0	FALSE
LC+57.021YVALDFEQEMATAASSSSLEK+0.000	tr|I3L4N8|I3L4N8_HUMAN;tr|A0A2R8Y793|A0A2R8Y793_HUMAN;tr|A0A2R8YEA7|A0A2R8YEA7_HUMAN;sp|P63261|ACTG_HUMAN;sp|P60709|ACTB_HUMAN;sp|Q6S8J3|POTEE_HUMAN	39748576	0	25065720	0	58743720	25867910	0.000829187	FALSE
NK+0.000TEDLEATSEHFK+0.000	tr|C9JXZ5|C9JXZ5_HUMAN;sp|Q9BV40|VAMP8_HUMAN	18018648	7766766	56732444	12563375	41590504	113827680	0	FALSE
VIHDNFGIVEGLM+15.995TTVHAITATQK+0.000	tr|E7EUT5|E7EUT5_HUMAN;sp|P04406|G3P_HUMAN;sp|P04406-2|G3P_HUMAN	11232292	6014711	26458742	3.23424e+06	22317126	43175164	0	FALSE
ISM+15.995PDIDLNLK+0.000GPK+0.000	sp|Q09666|AHNK_HUMAN	8846972	5.16331e+06	20654686	2.15823e+06	15234905	25062090	0	FALSE
ISM+15.995PDLDLNLK+0.000GPK+0.000	sp|Q09666|AHNK_HUMAN	8846972	5.16331e+06	20654686	2.15823e+06	15234905	25062090	0	FALSE
LDLDLTADSQPPVFK+0.000	tr|M0R0K9|M0R0K9_HUMAN;sp|Q13263|TIF1B_HUMAN;sp|Q13263-2|TIF1B_HUMAN	4588558	2.05437e+06	8.27376e+06	4213060	12786345	27433892	0	FALSE
TLYVEEVVPNVIEPSFGLGR+0.000	sp|P41250|GARS_HUMAN	12978414	1.43245e+06	24095274	2436616	16545555	24120474	0	FALSE
LQLEETDHQK+0.000NLLDEELQR+0.000	sp|Q15149|PLEC_HUMAN;sp|Q15149-2|PLEC_HUMAN;sp|Q15149-3|PLEC_HUMAN;sp|Q15149-4|PLEC_HUMAN;sp|Q15149-5|PLEC_HUMAN;sp|Q15149-6|PLEC_HUMAN;sp|Q15149-7|PLEC_HUMAN;sp|Q15149-8|PLEC_HUMAN;sp|Q15149-9|PLEC_HUMAN	4175360	2.93444e+06	12040858	2.25535e+06	10988522	29019078	0	FALSE
ELNIDVADVESLLVQC+57.021ILDNTIHGR+0.000	tr|B4DIH5|B4DIH5_HUMAN;sp|P61201|CSN2_HUMAN;sp|P61201-2|CSN2_HUMAN	4.98071e+06	1.61125e+06	10211098	2.0758e+06	8.03946e+06	16649565	0	FALSE
SLEQNIQLPAALLSR+0.000	sp|P33993|MCM7_HUMAN;sp|P33993-3|MCM7_HUMAN	24037354	9227754	38673860	0	49284300	104369032	0	FALSE
YGYTHLSTGDLLR+0.000	tr|Q5T9B7|Q5T9B7_HUMAN;sp|P00568|KAD1_HUMAN	16391619	0	600394	3.10793e+06	0	2.23827e+06	0	FALSE
ILYSQC+57.021GDVM+15.995R+0.000	tr|G3V1V0|G3V1V0_HUMAN;tr|B7Z6Z4|B7Z6Z4_HUMAN;tr|J3KND3|J3KND3_HUMAN;tr|F8W1R7|F8W1R7_HUMAN;tr|G8JLA2|G8JLA2_HUMAN;tr|F8W1I5|F8W1I5_HUMAN;tr|F8VPF3|F8VPF3_HUMAN;sp|P60660|MYL6_HUMAN;sp|P60660-2|MYL6_HUMAN;sp|P14649|MYL6B_HUMAN	1.78259e+06	1.58337e+06	8524292	2.83451e+06	6554804	6784172	0	FALSE
EGDETPNSIPADIVFIIK+0.000DK+0.000DHPK+0.000	sp|Q9UDY4|DNJB4_HUMAN	10939762	7412082	9661333	6299124	14879748	16700203	0	FALSE
ILQDGGLQVVEK+0.000	tr|A0A286YFM8|A0A286YFM8_HUMAN;tr|A0A286YFK5|A0A286YFK5_HUMAN;tr|A0A286YFF3|A0A286YFF3_HUMAN;tr|A0A286YFA2|A0A286YFA2_HUMAN;tr|A0A286YF34|A0A286YF34_HUMAN;tr|A0A286YFC8|A0A286YFC8_HUMAN;tr|A0A2C9F2M7|A0A2C9F2M7_HUMAN;tr|A0A286YF22|A0A286YF22_HUMAN;tr|A0A286YFL2|A0A286YFL2_HUMAN;tr|A0A286YER3|A0A286YER3_HUMAN;tr|A0A286YFB2|A0A286YFB2_HUMAN;sp|O43175|SERA_HUMAN	238817488	70850872	426725312	60531516	588183936	708002560	0	FALSE
SAGGIGVAVSC+57.021IR+0.000	tr|E9PP77|E9PP77_HUMAN;tr|E9PL69|E9PL69_HUMAN;tr|H0YCY7|H0YCY7_HUMAN;sp|P23921|RIR1_HUMAN	11310551	2.03705e+06	18511382	1.36122e+06	24326572	27857234	0	FALSE
ISMPDIDLNLK+0.000GPK+0.000	sp|Q09666|AHNK_HUMAN	72122184	26325110	159023104	22180492	142686992	211324064	0	FALSE
ISMPDLDLNLK+0.000GPK+0.000	sp|Q09666|AHNK_HUMAN	72122184	26325110	159023104	22180492	142686992	211324064	0	FALSE
SSILLDVK+0.000PWDDETDM+15.995AK+0.000LEEC+57.021VR+0.000	sp|P24534|EF1B_HUMAN	13072644	4.55558e+06	28474664	6.79021e+06	22544676	42587080	0	FALSE
R+0.000AEDGSVIDYELIDQDAR+0.000DLYDAGVK+0.000	tr|H0YMD0|H0YMD0_HUMAN;tr|H0YL33|H0YL33_HUMAN;tr|H0YN42|H0YN42_HUMAN;tr|H0YMU9|H0YMU9_HUMAN;tr|H0YM50|H0YM50_HUMAN;tr|H0YN28|H0YN28_HUMAN;tr|H0YNP5|H0YNP5_HUMAN;sp|P07355|ANXA2_HUMAN;sp|P07355-2|ANXA2_HUMAN	20226574	8759224	49067192	8.06909e+06	49708008	115638264	0	FALSE
QAASGLVGQENAR+0.000	sp|Q9Y265|RUVB1_HUMAN;sp|Q9Y265-2|RUVB1_HUMAN	16341858	5.52469e+06	34207672	640675	34833708	64793164	0	FALSE
AGGAAVVITEPEHTK+0.000ER+0.000	sp|Q9P258|RCC2_HUMAN	5.03725e+06	2226192	15956128	1.85397e+06	15667562	25776780	0	FALSE
EK+0.000IDLENTLEQEQEALVNR+0.000	sp|Q16204|CCDC6_HUMAN	12672807	5.57097e+06	28265728	4615576	36428676	51386548	0	FALSE
GTSQNDPNWVVR+0.000	sp|P07996|TSP1_HUMAN;sp|P07996-2|TSP1_HUMAN	20191716	0	0	1.02133e+06	3.46978e+06	3.71292e+06	0.000829187	FALSE
EGDETPNSIPADIVFIIK+0.000DK+0.000DHPK+0.000	sp|Q9UDY4|DNJB4_HUMAN	1.47157e+06	624182	2.33529e+06	652718	4811320	5212455	0	FALSE
IMLFTNEDNPHGNDSAK+0.000	tr|B1AHC9|B1AHC9_HUMAN;sp|P12956|XRCC6_HUMAN;sp|P12956-2|XRCC6_HUMAN	60820588	24306302	128154912	30594692	128016136	239065888	0	FALSE
IR+0.000YESLTDPSK+0.000LDSGK+0.000	tr|G3V2J8|G3V2J8_HUMAN;sp|P07900|HS90A_HUMAN;sp|P07900-2|HS90A_HUMAN;sp|P08238|HS90B_HUMAN;sp|Q58FF8|H90B2_HUMAN;sp|Q58FF7|H90B3_HUMAN	14113098	2904506	21109484	3.04625e+06	12812323	37692236	0	FALSE
EGFSIPVSADGFK+0.000	tr|J3KQ37|J3KQ37_HUMAN;tr|J3KNE0|J3KNE0_HUMAN;sp|P49792|RBP2_HUMAN;sp|Q7Z3J3|RGPD4_HUMAN;sp|O14715|RGPD8_HUMAN;sp|Q99666|RGPD5_HUMAN;sp|A6NKT7|RGPD3_HUMAN	17349256	4.67635e+06	37486400	6.7346e+06	40163880	87920000	0	FALSE
VTIAQGGVLPNIQAVLLPK+0.000K+0.000	tr|H0YFX9|H0YFX9_HUMAN;tr|A0A0U1RRH7|A0A0U1RRH7_HUMAN;tr|A0A0U1RR32|A0A0U1RR32_HUMAN;sp|Q9BTM1|H2AJ_HUMAN;sp|P04908|H2A1B_HUMAN;sp|P20671|H2A1D_HUMAN;sp|P0C0S8|H2A1_HUMAN;sp|Q96KK5|H2A1H_HUMAN;sp|Q93077|H2A1C_HUMAN;sp|Q16777|H2A2C_HUMAN;sp|Q99878|H2A1J_HUMAN;sp|Q6FI13|H2A2A_HUMAN;sp|Q7L7L0|H2A3_HUMAN	21042966	9710779	45490660	8217867	50964908	101795024	0	FALSE
SPLAGDFITMQC+57.021R+0.000	sp|O96019|ACL6A_HUMAN;sp|O96019-2|ACL6A_HUMAN	25805032	9984268	50606568	4442453	55744036	123066168	0	FALSE
NVTELNEPLSNEER+0.000	sp|P61981|1433G_HUMAN	192829456	62399332	391324352	19299486	365420160	778118208	0	FALSE
YLAADK+0.000DGNVTC+57.021ER+0.000	sp|Q16658|FSCN1_HUMAN	112361824	47173704	289303648	22782292	233590608	509376704	0	FALSE
ALMTVGK+0.000EPFPTIYVDSQK+0.000ENER+0.000	tr|K7EQ35|K7EQ35_HUMAN;tr|K7EJ19|K7EJ19_HUMAN;tr|K7EIU7|K7EIU7_HUMAN;sp|O43776|SYNC_HUMAN;sp|O43776-2|SYNC_HUMAN	1.0138e+06	2.56972e+06	6.91194e+06	945382	1.9511e+06	14549341	0	FALSE
TIVITSHPGQIVK+0.000	sp|P31689|DNJA1_HUMAN;sp|P31689-2|DNJA1_HUMAN	88464040	26082256	144877024	33135162	279854976	612881216	0	FALSE
TYEEGLK+0.000HEANNPQLK+0.000EGLQNM+15.995EAR+0.000	tr|F5GXD8|F5GXD8_HUMAN;tr|F5H783|F5H783_HUMAN;sp|P31948|STIP1_HUMAN;sp|P31948-2|STIP1_HUMAN	10707283	7.00076e+06	16845990	0	10564447	14313746	0	FALSE
LIQLMEEIMAEK+0.000ENK+0.000	tr|A0A1X7SBZ2|A0A1X7SBZ2_HUMAN;tr|A0A1W2PQ51|A0A1W2PQ51_HUMAN;sp|Q92841|DDX17_HUMAN;sp|Q92841-1|DDX17_HUMAN;sp|Q92841-2|DDX17_HUMAN;sp|Q92841-3|DDX17_HUMAN	18334014	8.02225e+06	49868176	5.54562e+06	67953648	109996808	0	FALSE
HILLAVANDEELNQLLK+0.000	tr|D6RCF2|D6RCF2_HUMAN;sp|Q9P0M6|H2AW_HUMAN;sp|O75367|H2AY_HUMAN;sp|O75367-2|H2AY_HUMAN;sp|O75367-3|H2AY_HUMAN	6375495	4.95006e+06	10311363	11861596	7218229	21334326	0	FALSE
YLQDLLAWVEENQHR+0.000	tr|H0YDN1|H0YDN1_HUMAN;tr|E9PMV1|E9PMV1_HUMAN;sp|Q15149|PLEC_HUMAN;sp|Q15149-2|PLEC_HUMAN;sp|Q15149-3|PLEC_HUMAN;sp|Q15149-4|PLEC_HUMAN;sp|Q15149-5|PLEC_HUMAN;sp|Q15149-6|PLEC_HUMAN;sp|Q15149-7|PLEC_HUMAN;sp|Q15149-8|PLEC_HUMAN;sp|Q15149-9|PLEC_HUMAN	6241504	2340023	11436225	790693	13053074	29152218	0	FALSE
SGPFGQIFR+0.000PDNFVFGQSGAGNNWAK+0.000	tr|Q5ST81|Q5ST81_HUMAN;tr|Q5JP53|Q5JP53_HUMAN;tr|M0R1I1|M0R1I1_HUMAN;tr|M0QZL7|M0QZL7_HUMAN;tr|M0R278|M0R278_HUMAN;tr|M0QY85|M0QY85_HUMAN;sp|P04350|TBB4A_HUMAN;sp|P07437|TBB5_HUMAN;sp|Q13885|TBB2A_HUMAN;sp|P68371|TBB4B_HUMAN;sp|Q9BVA1|TBB2B_HUMAN	657922880	475092544	1529930112	700479104	1731928448	3188724480	0	FALSE
GLYGIK+0.000DDVFLSVPC+57.021ILGQNGISDLVK+0.000	sp|P00338|LDHA_HUMAN;sp|P00338-3|LDHA_HUMAN;sp|P00338-4|LDHA_HUMAN	81131112	48440672	218489408	91218808	183398432	387746432	0	FALSE
GVVQELQQAISK+0.000LEAR+0.000	tr|E9PL12|E9PL12_HUMAN;tr|E9PK01|E9PK01_HUMAN;tr|E9PRY8|E9PRY8_HUMAN;tr|E9PIZ1|E9PIZ1_HUMAN;tr|E9PN91|E9PN91_HUMAN;tr|H0YCK7|H0YCK7_HUMAN;tr|E9PMW7|E9PMW7_HUMAN;tr|E9PPR1|E9PPR1_HUMAN;tr|A0A087X1X7|A0A087X1X7_HUMAN;tr|E9PL71|E9PL71_HUMAN;tr|E9PQ49|E9PQ49_HUMAN;tr|E9PI39|E9PI39_HUMAN;sp|P29692|EF1D_HUMAN;sp|P29692-2|EF1D_HUMAN;sp|P29692-3|EF1D_HUMAN	1.0581e+06	873467	3163641	0	3.91825e+06	5.67746e+06	0	FALSE
TPSSDVLVFDYTK+0.000	tr|H0YF10|H0YF10_HUMAN;tr|E9PC52|E9PC52_HUMAN;tr|Q5JP01|Q5JP01_HUMAN;sp|Q09028|RBBP4_HUMAN;sp|Q09028-2|RBBP4_HUMAN;sp|Q09028-3|RBBP4_HUMAN;sp|Q09028-4|RBBP4_HUMAN;sp|Q16576|RBBP7_HUMAN;sp|Q16576-2|RBBP7_HUMAN	14406064	5069499	22967396	5.25398e+06	28456362	58934816	0	FALSE
SLEQNIQLPAALLSR+0.000	sp|P33993|MCM7_HUMAN;sp|P33993-3|MCM7_HUMAN	24358820	9064424	37330096	1.01283e+06	49543344	105051184	0	FALSE
SGK+0.000TELAEPIAIR+0.000PTSETVM+15.995YPAYAK+0.000	sp|P07814|SYEP_HUMAN	25874680	13392703	66783460	10146403	58752232	84966360	0	FALSE
WDTC+57.021APEVILHAVGGK+0.000	tr|A6NF51|A6NF51_HUMAN;sp|O95861|BPNT1_HUMAN;sp|O95861-2|BPNT1_HUMAN;sp|O95861-3|BPNT1_HUMAN;sp|O95861-4|BPNT1_HUMAN	7.14537e+06	1.43527e+06	17552714	4.47389e+06	13721751	19464602	0	FALSE
EVWFFGLQYQDTK+0.000	tr|V9GZ54|V9GZ54_HUMAN;sp|P26038|MOES_HUMAN	8945355	594242	8401585	6.68799e+06	16939532	35609536	0	FALSE
TK+0.000PYIQVDIGGGQTK+0.000	sp|P11021|BIP_HUMAN	5472981	5.12787e+06	17170506	4.95865e+06	11020581	0	0	FALSE
FLPR+0.000EEGPYEVEVTYDGVPVPGSPFPLEAVAPTK+0.000PSK+0.000	tr|Q60FE5|Q60FE5_HUMAN;tr|A0A087WWY3|A0A087WWY3_HUMAN;sp|P21333|FLNA_HUMAN;sp|P21333-2|FLNA_HUMAN	134986736	66881360	226547968	38228540	238608096	475427200	0	FALSE
DSDELK+0.000SWVNEK+0.000	tr|A0A0D9SF54|A0A0D9SF54_HUMAN;tr|A0A0D9SGF6|A0A0D9SGF6_HUMAN;sp|Q13813|SPTN1_HUMAN;sp|Q13813-2|SPTN1_HUMAN;sp|Q13813-3|SPTN1_HUMAN	8617576	452419	11684805	2.10474e+06	11789564	31955142	0	FALSE
SGK+0.000TELAEPIAIR+0.000PTSETVMYPAYAK+0.000	sp|P07814|SYEP_HUMAN	18587098	16586376	51429652	3.47208e+06	56673572	72594992	0	FALSE
YC+57.021IFANFSVTGGK+0.000	sp|Q86VZ2|WDR5B_HUMAN;sp|P61964|WDR5_HUMAN	5.35781e+06	72413	7219469	5.14584e+06	74866392	18551628	0	FALSE
YPASTVQILGAEK+0.000	tr|H0YDU4|H0YDU4_HUMAN;tr|H0Y653|H0Y653_HUMAN;sp|O00567|NOP56_HUMAN	8809597	7.67357e+06	25208184	2.66371e+06	13973207	31819410	0	FALSE
SLQADTTNTDTALTTLEEALAEK+0.000ER+0.000	tr|X6RLX0|X6RLX0_HUMAN;tr|X6RM00|X6RM00_HUMAN;tr|G8JLD3|G8JLD3_HUMAN;sp|Q8IUD2|RB6I2_HUMAN;sp|Q8IUD2-2|RB6I2_HUMAN;sp|Q8IUD2-3|RB6I2_HUMAN;sp|Q8IUD2-4|RB6I2_HUMAN;sp|Q8IUD2-5|RB6I2_HUMAN	10105252	5329197	25708612	2.3205e+06	24493974	42112568	0	FALSE
LK+0.000GIEEEEILPGFILC+57.021DPNNLC+57.021HSGR+0.000	tr|H3BR35|H3BR35_HUMAN;sp|P15170|ERF3A_HUMAN;sp|P15170-2|ERF3A_HUMAN;sp|P15170-3|ERF3A_HUMAN	121752144	76632544	323473760	51346312	305947200	515659008	0	FALSE
IVSGIITPIHEQWEK+0.000	tr|Q5QPM9|Q5QPM9_HUMAN;tr|Q5QPM7|Q5QPM7_HUMAN;sp|Q92530|PSMF1_HUMAN	15585228	4327183	28931682	3.81337e+06	29975010	65839548	0	FALSE
K+0.000QPPVSPGTALVGSQK+0.000	sp|P17096|HMGA1_HUMAN;sp|P17096-3|HMGA1_HUMAN	8676931	4346079	18088050	8603022	13236750	30875330	0	FALSE
SLGEIPIVESEIK+0.000K+0.000EAGELK+0.000PEEEITVGPVQK+0.000	sp|P53618|COPB_HUMAN	55458540	15696685	94773656	6.68638e+06	98231360	188006672	0	FALSE
ISMPDIDLNLK+0.000GPK+0.000	sp|Q09666|AHNK_HUMAN	16716782	1.77932e+06	40337492	3.8946e+06	18520278	28379210	0	FALSE
ISMPDLDLNLK+0.000GPK+0.000	sp|Q09666|AHNK_HUMAN	16716782	1.77932e+06	40337492	3.8946e+06	18520278	28379210	0	FALSE
NPEVGLK+0.000PVWYSPK+0.000	tr|V9GYZ6|V9GYZ6_HUMAN;sp|P07814|SYEP_HUMAN	16521300	7.66003e+06	35671200	15512697	36149020	44525732	0	FALSE
SGASGPENFQVGSMPPAQQQITSGQMHR+0.000	sp|Q9Y490|TLN1_HUMAN	12284340	5.33314e+06	18309368	6230193	18314742	26163040	0	FALSE
YPALTK+0.000PENQDIDWTLLEGETR+0.000EER+0.000	tr|A0A0A0MSQ0|A0A0A0MSQ0_HUMAN;tr|H7C4N2|H7C4N2_HUMAN;sp|P13797|PLST_HUMAN;sp|P13797-2|PLST_HUMAN;sp|P13797-3|PLST_HUMAN	2456026	1.27376e+06	3444452	0	4.4696e+06	12423555	0	FALSE
SYC+57.021AEIAHNVSSK+0.000	tr|F8W727|F8W727_HUMAN;tr|D3YTB1|D3YTB1_HUMAN;sp|P62910|RL32_HUMAN	34952448	13043358	76910368	7.96008e+06	70533008	145647904	0	FALSE
EMNPALGIDC+57.021LHK+0.000	tr|E9PCA1|E9PCA1_HUMAN;tr|E7ENZ3|E7ENZ3_HUMAN;tr|B7ZAR1|B7ZAR1_HUMAN;sp|P48643|TCPE_HUMAN;sp|P48643-2|TCPE_HUMAN	58572428	20395578	144833120	25514466	139998016	283984512	0	FALSE
VFGAPNVVEDEIDQYLSK+0.000	tr|A0A0D9SFI9|A0A0D9SFI9_HUMAN;tr|I3L4U9|I3L4U9_HUMAN;sp|Q8TAT6|NPL4_HUMAN;sp|Q8TAT6-2|NPL4_HUMAN	11346631	6.10206e+06	23175698	5.88696e+06	20199680	41594532	0	FALSE
NIIHGSDSVESAEK+0.000	sp|P15531|NDKA_HUMAN;sp|P15531-2|NDKA_HUMAN	11076797	5052842	24554772	2168030	24945666	53618964	0	FALSE
VTIAQGGVLPNIQAVLLPK+0.000	tr|H0YFX9|H0YFX9_HUMAN;tr|A0A0U1RRH7|A0A0U1RRH7_HUMAN;tr|A0A0U1RR32|A0A0U1RR32_HUMAN;sp|Q9BTM1|H2AJ_HUMAN;sp|P04908|H2A1B_HUMAN;sp|P20671|H2A1D_HUMAN;sp|P0C0S8|H2A1_HUMAN;sp|Q96KK5|H2A1H_HUMAN;sp|Q93077|H2A1C_HUMAN;sp|Q16777|H2A2C_HUMAN;sp|Q99878|H2A1J_HUMAN;sp|Q6FI13|H2A2A_HUMAN;sp|Q7L7L0|H2A3_HUMAN	16498131	6825532	30861562	8304228	34139660	61359264	0	FALSE
IAIPGLAGAGNSVLLVSNLNPER+0.000	tr|K7EK45|K7EK45_HUMAN;tr|A0A0U1RRM4|A0A0U1RRM4_HUMAN;tr|A6NLN1|A6NLN1_HUMAN;sp|P26599|PTBP1_HUMAN;sp|P26599-2|PTBP1_HUMAN;sp|P26599-3|PTBP1_HUMAN	190991600	60921892	345153472	66779492	347946400	697597440	0	FALSE
SLEQNIQLPAALLSR+0.000	sp|P33993|MCM7_HUMAN;sp|P33993-3|MCM7_HUMAN	15637858	5.25659e+06	22859224	655386	29777866	62936664	0	FALSE
DAGIEPGPDTYLALLNAYAEK+0.000GDIDHVK+0.000QTLEK+0.000VEK+0.000	tr|C9JCA9|C9JCA9_HUMAN;tr|B8ZZ38|B8ZZ38_HUMAN;tr|A0A0C4DG06|A0A0C4DG06_HUMAN;sp|P42704|LPPRC_HUMAN	7.26457e+06	1.18387e+06	17910968	2.9988e+06	21052444	32221474	0	FALSE
HK+0.000DAAIYLVTSLASK+0.000	sp|P55060|XPO2_HUMAN;sp|P55060-3|XPO2_HUMAN;sp|P55060-4|XPO2_HUMAN	6241738	4101510	11269106	0	18819240	17941576	0	FALSE
ILLAELEQLK+0.000GQGK+0.000	tr|B0YJC4|B0YJC4_HUMAN;tr|A0A1B0GTT5|A0A1B0GTT5_HUMAN;sp|P08670|VIME_HUMAN	637759424	265704688	1350034048	152236784	1302736640	2310007296	0	FALSE
K+0.000GYEVIYLTEPVDEYC+57.021IQALPEFDGK+0.000R+0.000	sp|P14625|ENPL_HUMAN	18029456	10697399	59243932	17065182	48997344	79032584	0	FALSE
GSQWSDIEEFC+57.021NR+0.000	tr|B1AP13|B1AP13_HUMAN;tr|H3BLV0|H3BLV0_HUMAN;tr|H7BY55|H7BY55_HUMAN;sp|P08174|DAF_HUMAN;sp|P08174-2|DAF_HUMAN;sp|P08174-3|DAF_HUMAN;sp|P08174-4|DAF_HUMAN;sp|P08174-5|DAF_HUMAN;sp|P08174-6|DAF_HUMAN;sp|P08174-7|DAF_HUMAN	1.59844e+06	0	4654236	249988	2.94875e+06	6.76955e+06	0	FALSE
MK+0.000EIAEAYLGYPVTNAVITVPAYFNDSQR+0.000	tr|A0A0G2JIW1|A0A0G2JIW1_HUMAN;sp|P0DMV9|HS71B_HUMAN;sp|P0DMV8|HS71A_HUMAN	24176608	21404810	51753932	12406552	69033256	159158288	0	FALSE
FAEHGETLAMK+0.000	tr|A0A0B4J1W3|A0A0B4J1W3_HUMAN;sp|Q6N069|NAA16_HUMAN;sp|Q6N069-2|NAA16_HUMAN;sp|Q6N069-3|NAA16_HUMAN;sp|Q6N069-4|NAA16_HUMAN;sp|Q6N069-5|NAA16_HUMAN;sp|Q9BXJ9|NAA15_HUMAN;sp|Q9BXJ9-4|NAA15_HUMAN	4603312	779683	10681819	1.08984e+06	12432837	27308190	0	FALSE
APK+0.000PDGPGGGPGGSHMGGNYGDDR+0.000	tr|H3BPE7|H3BPE7_HUMAN;sp|P35637|FUS_HUMAN;sp|P35637-2|FUS_HUMAN	42103348	22023412	81427624	2.964e+06	77255496	192463888	0	FALSE
FM+15.995QTFVLAPEGSVANK+0.000	tr|E5RIZ6|E5RIZ6_HUMAN;sp|Q13283|G3BP1_HUMAN	5.48108e+06	835756	11562055	2.07521e+06	14520536	29616020	0	FALSE
NQSFC+57.021PTVNLDK+0.000LWTLVSEQTR+0.000	tr|E9PJD9|E9PJD9_HUMAN;tr|E9PLL6|E9PLL6_HUMAN;sp|P46776|RL27A_HUMAN	15082860	0	25271230	9474617	144601152	122503152	0	FALSE
AGYTDK+0.000VVIGMDVAASEFFR+0.000	tr|A0A2R8Y6G6|A0A2R8Y6G6_HUMAN;sp|P06733|ENOA_HUMAN;sp|P06733-2|ENOA_HUMAN	2.82816e+06	795183	0	0	3.07288e+06	85031.6	0.000829187	FALSE
EVQTNDLK+0.000EVVNK+0.000	tr|D6R9B6|D6R9B6_HUMAN;tr|D6RAT0|D6RAT0_HUMAN;tr|H0Y9Y4|H0Y9Y4_HUMAN;tr|D6RG13|D6RG13_HUMAN;tr|D6RB09|D6RB09_HUMAN;tr|E9PFI5|E9PFI5_HUMAN;sp|P61247|RS3A_HUMAN	169528592	69282984	409677632	38609680	319537248	583483328	0	FALSE
VADMALHYANK+0.000	tr|H7C4C8|H7C4C8_HUMAN;sp|P50990|TCPQ_HUMAN;sp|P50990-2|TCPQ_HUMAN;sp|P50990-3|TCPQ_HUMAN	14647252	4.70337e+06	33963944	3.25097e+06	35543716	65301820	0	FALSE
TFGENYVQELLEK+0.000	tr|E5RG77|E5RG77_HUMAN;tr|E5RFX7|E5RFX7_HUMAN;sp|O94903|PLPHP_HUMAN	10275827	2482954	16741422	2.53134e+06	14031605	36259108	0	FALSE
R+0.000SLGYAYVNFQQPADAER+0.000	tr|B1ANR0|B1ANR0_HUMAN;tr|B1ANR1|B1ANR1_HUMAN;tr|E7EQV3|E7EQV3_HUMAN;tr|E5RJB9|E5RJB9_HUMAN;tr|E5RGH3|E5RGH3_HUMAN;tr|E5RHG7|E5RHG7_HUMAN;tr|A0A087WTT1|A0A087WTT1_HUMAN;tr|E5RH24|E5RH24_HUMAN;tr|H0YBN4|H0YBN4_HUMAN;tr|E7ERJ7|E7ERJ7_HUMAN;sp|Q13310|PABP4_HUMAN;sp|Q13310-2|PABP4_HUMAN;sp|Q13310-3|PABP4_HUMAN;sp|P11940|PABP1_HUMAN;sp|P11940-2|PABP1_HUMAN	16091375	7104983	30832172	1.99923e+06	37925144	76800200	0	FALSE
IAIPGLAGAGNSVLLVSNLNPER+0.000	tr|K7EK45|K7EK45_HUMAN;tr|A0A0U1RRM4|A0A0U1RRM4_HUMAN;tr|A6NLN1|A6NLN1_HUMAN;sp|P26599|PTBP1_HUMAN;sp|P26599-2|PTBP1_HUMAN;sp|P26599-3|PTBP1_HUMAN	17355402	0	26415294	10351791	0	6.77158e+06	0	FALSE
VADMALHYANK+0.000	tr|H7C4C8|H7C4C8_HUMAN;sp|P50990|TCPQ_HUMAN;sp|P50990-2|TCPQ_HUMAN;sp|P50990-3|TCPQ_HUMAN	35275272	12635629	96323712	4.19667e+06	81999600	167101376	0	FALSE
ISFLENNLEQLTK+0.000	tr|J3KNA1|J3KNA1_HUMAN;tr|A0A0G2JMZ6|A0A0G2JMZ6_HUMAN;sp|P33176|KINH_HUMAN;sp|O60282|KIF5C_HUMAN;sp|O60282-2|KIF5C_HUMAN;sp|Q12840|KIF5A_HUMAN	3.86568e+06	561653	4.12424e+06	1.1281e+06	3.16177e+06	5187237	0	FALSE
EMNPALGIDC+57.021LHK+0.000	tr|E9PCA1|E9PCA1_HUMAN;tr|E7ENZ3|E7ENZ3_HUMAN;tr|B7ZAR1|B7ZAR1_HUMAN;sp|P48643|TCPE_HUMAN;sp|P48643-2|TCPE_HUMAN	29135972	6581341	43167728	9017090	42398428	83984944	0	FALSE
LLATEQEDAAVAK+0.000	tr|A0A087WVV2|A0A087WVV2_HUMAN;tr|F8W7S5|F8W7S5_HUMAN;sp|Q9P2E9|RRBP1_HUMAN;sp|Q9P2E9-3|RRBP1_HUMAN	13070419	4474594	28422690	3.99731e+06	31730502	66216604	0	FALSE
EHGLIFMETSAK+0.000	tr|A0A3B3ITL1|A0A3B3ITL1_HUMAN;tr|H7C125|H7C125_HUMAN;sp|P61019|RAB2A_HUMAN;sp|P61019-2|RAB2A_HUMAN;sp|Q8WUD1|RAB2B_HUMAN;sp|Q8WUD1-2|RAB2B_HUMAN	21430470	5.63569e+06	49598704	5722745	44897144	108493944	0	FALSE
LIQSHPESAEDLQEK+0.000	tr|A0A0D9SF54|A0A0D9SF54_HUMAN;tr|A0A0D9SGF6|A0A0D9SGF6_HUMAN;sp|Q13813|SPTN1_HUMAN;sp|Q13813-2|SPTN1_HUMAN;sp|Q13813-3|SPTN1_HUMAN	23970302	12560074	59172984	12141010	64426496	122566896	0	FALSE
LDIDPSTITWQR+0.000	tr|B7ZM99|B7ZM99_HUMAN;tr|A0A087WVM4|A0A087WVM4_HUMAN;sp|Q6UB35|C1TM_HUMAN	15039856	4.07961e+06	40332624	7.7801e+06	36334916	73679984	0	FALSE
AGAIAPC+57.021EVTVPAQNTGLGPEK+0.000	tr|G3V210|G3V210_HUMAN;tr|F8VRK7|F8VRK7_HUMAN;tr|F8VPE8|F8VPE8_HUMAN;tr|F8VWS0|F8VWS0_HUMAN;tr|F8VU65|F8VU65_HUMAN;tr|F8VQY6|F8VQY6_HUMAN;tr|F8VW21|F8VW21_HUMAN;sp|P05388|RLA0_HUMAN;sp|P05388-2|RLA0_HUMAN;sp|Q8NHW5|RLA0L_HUMAN	218337168	62523400	397730624	180185680	324309120	631487424	0	FALSE
GHEGPVWQVAWAHPMYGNILASC+57.021SYDR+0.000K+0.000	tr|E7ERC8|E7ERC8_HUMAN;tr|A8MXL6|A8MXL6_HUMAN;sp|P55735|SEC13_HUMAN;sp|P55735-2|SEC13_HUMAN;sp|P55735-3|SEC13_HUMAN;sp|P55735-4|SEC13_HUMAN	6.30062e+06	3.05703e+06	17470890	3.80896e+06	26165622	38755496	0	FALSE
SFTPDHVVYAR+0.000	sp|Q6NZI2|CAVN1_HUMAN;sp|Q6NZI2-2|CAVN1_HUMAN;sp|Q6NZI2-3|CAVN1_HUMAN	4218080	369317	11274206	4.50377e+06	11884181	27063936	0	FALSE
DGNASGTTLLEALDC+57.021ILPPTR+0.000PTDK+0.000PLR+0.000LPLQDVYK+0.000	tr|A0A087WV01|A0A087WV01_HUMAN;tr|A0A087WVQ9|A0A087WVQ9_HUMAN;sp|Q5VTE0|EF1A3_HUMAN;sp|P68104|EF1A1_HUMAN;sp|P68104-2|EF1A1_HUMAN	27440418	19878402	61738484	8636023	57070448	70402640	0	FALSE
WTQTLSELDLAVPFC+57.021VNFR+0.000	sp|Q9Y266|NUDC_HUMAN	2.85186e+06	803296	5.8277e+06	1.60126e+06	7.53518e+06	15038023	0	FALSE
GQILTM+15.995ANPIIGNGGAPDTTALDELGLSK+0.000	tr|C9JTA4|C9JTA4_HUMAN;tr|E7EWJ3|E7EWJ3_HUMAN;tr|Q5R211|Q5R211_HUMAN;sp|P31327|CPSM_HUMAN;sp|P31327-3|CPSM_HUMAN	4.57332e+06	5.66614e+06	7.28308e+06	10897403	17016174	22199130	0	FALSE
LMTQAQLEEATR+0.000	tr|H7C5F2|H7C5F2_HUMAN;tr|H7C5H3|H7C5H3_HUMAN;tr|G5E9V5|G5E9V5_HUMAN;tr|G5E9W7|G5E9W7_HUMAN;sp|P82650|RT22_HUMAN;sp|P82650-2|RT22_HUMAN	15862119	6.32589e+06	32273666	10460196	54423164	67255008	0	FALSE
IFHTVTTTDDPVIR+0.000	tr|B0QYA5|B0QYA5_HUMAN;tr|B0QYA4|B0QYA4_HUMAN;sp|O15371|EIF3D_HUMAN;sp|O15371-2|EIF3D_HUMAN;sp|O15371-3|EIF3D_HUMAN	82707152	25462780	167852368	9029264	150297936	291913600	0	FALSE
VLLGETGK+0.000EK+0.000LPR+0.000	tr|M0QZC5|M0QZC5_HUMAN;tr|M0R1H6|M0R1H6_HUMAN;sp|P62280|RS11_HUMAN	38914988	15227149	91944064	10556060	89233280	149130192	0	FALSE
VFGAPNVVEDEIDQYLSK+0.000	tr|A0A0D9SFI9|A0A0D9SFI9_HUMAN;tr|I3L4U9|I3L4U9_HUMAN;sp|Q8TAT6|NPL4_HUMAN;sp|Q8TAT6-2|NPL4_HUMAN	33646452	5.23041e+06	23115194	5.43885e+06	26473858	51026932	0	FALSE
YALYDASFETK+0.000	tr|F6RFD5|F6RFD5_HUMAN;sp|P60981|DEST_HUMAN;sp|P60981-2|DEST_HUMAN	84718880	24981116	175406720	25622736	203809824	374975392	0	FALSE
LDLDLTADSQPPVFK+0.000	tr|M0R0K9|M0R0K9_HUMAN;sp|Q13263|TIF1B_HUMAN;sp|Q13263-2|TIF1B_HUMAN	53981268	16001125	93580584	29181466	91951168	206166976	0	FALSE
EVQTNDLK+0.000EVVNK+0.000	tr|D6R9B6|D6R9B6_HUMAN;tr|D6RAT0|D6RAT0_HUMAN;tr|H0Y9Y4|H0Y9Y4_HUMAN;tr|D6RG13|D6RG13_HUMAN;tr|D6RB09|D6RB09_HUMAN;tr|E9PFI5|E9PFI5_HUMAN;sp|P61247|RS3A_HUMAN	10903925	21970034	7567649	19220028	2.54613e+06	4.4026e+06	0	FALSE
R+0.000AEDGSVIDYELIDQDAR+0.000	tr|H0YMD0|H0YMD0_HUMAN;tr|H0YL33|H0YL33_HUMAN;tr|H0YN42|H0YN42_HUMAN;tr|H0YMU9|H0YMU9_HUMAN;tr|H0YM50|H0YM50_HUMAN;tr|H0YNA0|H0YNA0_HUMAN;tr|H0YN28|H0YN28_HUMAN;tr|H0YNP5|H0YNP5_HUMAN;sp|P07355|ANXA2_HUMAN;sp|P07355-2|ANXA2_HUMAN	20173798	5.5957e+06	41127828	2.18755e+06	27456796	80428528	0	FALSE
DINAYNC+57.021EEPTEK+0.000LPFPIIDDR+0.000	sp|P30041|PRDX6_HUMAN	5.92799e+06	3.23432e+06	10065554	1.51702e+06	8638243	8.12911e+06	0	FALSE
LQNALNEQR+0.000VEFATLQEALAHALTEK+0.000EGK+0.000DQELAK+0.000	tr|A0A087WY61|A0A087WY61_HUMAN;sp|Q14980|NUMA1_HUMAN;sp|Q14980-2|NUMA1_HUMAN;sp|Q14980-3|NUMA1_HUMAN;sp|Q14980-4|NUMA1_HUMAN	10581657	2.5838e+06	25672982	3.86629e+06	39266952	54306360	0	FALSE
TVIK+0.000K+0.000DEQEHEFYK+0.000	sp|P43686|PRS6B_HUMAN;sp|P43686-2|PRS6B_HUMAN	11650401	4.82248e+06	29876148	3.39247e+06	31973380	61316480	0	FALSE
DIDPQNDLTFLR+0.000	tr|B1AKR6|B1AKR6_HUMAN;tr|H3BQI1|H3BQI1_HUMAN;sp|Q9NP97|DLRB1_HUMAN;sp|Q8TF09|DLRB2_HUMAN	27850194	12708835	55162004	6.13463e+06	58317124	114528080	0	FALSE
INQVFHGSC+57.021ITEGNELTK+0.000	sp|P78527|PRKDC_HUMAN;sp|P78527-2|PRKDC_HUMAN	19402782	11484096	45436400	10186209	44644516	79174224	0	FALSE
YISPDQLADLYK+0.000	tr|A0A2R8Y6G6|A0A2R8Y6G6_HUMAN;sp|P06733|ENOA_HUMAN;sp|P06733-2|ENOA_HUMAN	12571297	7.89703e+06	23485080	11434727	20798358	22500030	0	FALSE
VTYHPDGPEGQAYDVDFTPPFR+0.000R+0.000	sp|Q15046|SYK_HUMAN;sp|Q15046-2|SYK_HUMAN	25640144	12451585	51106696	1424675	55525248	95369280	0	FALSE
SGSLENVPNVGVNK+0.000	sp|P53004|BIEA_HUMAN	41927712	12319892	73284080	16833088	65994044	116462056	0	FALSE
VK+0.000PFM+15.995TGAAEQIK+0.000	tr|A0A0B4J2C3|A0A0B4J2C3_HUMAN;tr|E9PJF7|E9PJF7_HUMAN;tr|J3KPG2|J3KPG2_HUMAN;tr|Q5W0H4|Q5W0H4_HUMAN;sp|P13693|TCTP_HUMAN;sp|P13693-2|TCTP_HUMAN;sp|Q56UQ5|TPT1L_HUMAN	2.79292e+06	1.51582e+06	8.17521e+06	997825	7.7695e+06	25575756	0	FALSE
LQNALNEQR+0.000VEFATLQEALAHALTEK+0.000EGK+0.000DQELAK+0.000	tr|A0A087WY61|A0A087WY61_HUMAN;sp|Q14980|NUMA1_HUMAN;sp|Q14980-2|NUMA1_HUMAN;sp|Q14980-3|NUMA1_HUMAN;sp|Q14980-4|NUMA1_HUMAN	11903196	5.06951e+06	20648912	2914260	32966122	50252912	0	FALSE
YTLPPGVDPTQVSSSLSPEGTLTVEAPMPK+0.000	sp|P04792|HSPB1_HUMAN	12372185	9326507	10827367	11113610	31935354	26924156	0	FALSE
AYQK+0.000QPTIFQNK+0.000	tr|M0QZC5|M0QZC5_HUMAN;tr|M0R1H6|M0R1H6_HUMAN;sp|P62280|RS11_HUMAN	5105224	1.16233e+06	6.00846e+06	738167	4447118	13604597	0	FALSE
GYISPYFINTSK+0.000	tr|E7ESH4|E7ESH4_HUMAN;sp|P10809|CH60_HUMAN	16044135	26063392	135754368	72410264	179898736	72146952	0	FALSE
TK+0.000DLPVTEAVFSALVTGHAR+0.000	tr|C9JCA9|C9JCA9_HUMAN;tr|B8ZZ38|B8ZZ38_HUMAN;tr|A0A0C4DG06|A0A0C4DG06_HUMAN;sp|P42704|LPPRC_HUMAN	31409958	10150293	64730824	3.89933e+06	68560648	122034776	0	FALSE
GIFPVLC+57.021K+0.000DPVQEAWAEDVDLR+0.000	tr|B4DNK4|B4DNK4_HUMAN;tr|H3BR70|H3BR70_HUMAN;sp|P14618|KPYM_HUMAN;sp|P14618-2|KPYM_HUMAN;sp|P14618-3|KPYM_HUMAN	373366464	228733296	1118529536	110714320	890748928	1595940608	0	FALSE
M+15.995VVPGLDGAQIPR+0.000DPSQQELPR+0.000	tr|A0A0U1RQF0|A0A0U1RQF0_HUMAN;sp|P49327|FAS_HUMAN	6769086	359878	22386948	0	16926030	41543628	0.000585995	FALSE
QASPNIVIALAGNK+0.000	tr|K7ERQ8|K7ERQ8_HUMAN;tr|K7ENY4|K7ENY4_HUMAN;tr|K7ERI8|K7ERI8_HUMAN;sp|P51148|RAB5C_HUMAN;sp|P51148-2|RAB5C_HUMAN	21297146	12004935	17908222	773968	17903042	36133040	0	FALSE
DGVYFLYEALHGPPK+0.000K+0.000	sp|P30520|PURA2_HUMAN	12201811	7.21685e+06	22001424	6.54998e+06	22655580	41236884	0	FALSE
AITGASLADIM+15.995AK+0.000	tr|C9JNW5|C9JNW5_HUMAN;tr|C9JXB8|C9JXB8_HUMAN;sp|P83731|RL24_HUMAN	72063376	18313712	124287264	15321045	102812840	195913984	0	FALSE
TAAENEFVVLK+0.000K+0.000	sp|Q14CN4|K2C72_HUMAN;sp|Q14CN4-2|K2C72_HUMAN;sp|Q14CN4-3|K2C72_HUMAN;sp|P08729|K2C7_HUMAN	33881756	14323163	75119680	5179291	64086068	165370160	0	FALSE
TFIAIK+0.000PDGVQR+0.000	tr|E5RHP0|E5RHP0_HUMAN;tr|E7ERL0|E7ERL0_HUMAN;tr|C9K028|C9K028_HUMAN;tr|Q32Q12|Q32Q12_HUMAN;tr|F6XY72|F6XY72_HUMAN;tr|J3KPD9|J3KPD9_HUMAN;sp|P22392|NDKB_HUMAN;sp|P22392-2|NDKB_HUMAN;sp|P15531|NDKA_HUMAN;sp|P15531-2|NDKA_HUMAN	182240032	60704096	446413568	55587268	460223200	872409344	0	FALSE
DYVAPTANLDQK+0.000DK+0.000QFVAK+0.000	sp|Q7KZF4|SND1_HUMAN	14524209	7138846	30806862	2.70991e+06	32415954	55304740	0	FALSE
ISSIQSIVPALEIANAHR+0.000	sp|P10809|CH60_HUMAN	25601290	4.10719e+06	19419774	765108	20647156	37999568	0	FALSE
VGGVQSLGGTGALR+0.000	sp|P17174|AATC_HUMAN;sp|P17174-2|AATC_HUMAN	27607410	8810844	102385176	18821110	67835056	95606296	0	FALSE
LTR+0.000DETNYGIPQR+0.000	tr|E9PD14|E9PD14_HUMAN;tr|D6RHH4|D6RHH4_HUMAN;tr|D6RAU2|D6RAU2_HUMAN;tr|D6RAC2|D6RAC2_HUMAN;tr|D6RFZ9|D6RFZ9_HUMAN;tr|D6RFX4|D6RFX4_HUMAN;tr|D6R9L0|D6R9L0_HUMAN;tr|D6R909|D6R909_HUMAN;tr|D6RGK8|D6RGK8_HUMAN;tr|D6REE5|D6REE5_HUMAN;tr|D6R9Z1|D6R9Z1_HUMAN;tr|D6RBD0|D6RBD0_HUMAN;sp|P63244|RACK1_HUMAN	10060850	6.31114e+06	7651665	1.65061e+06	8.2581e+06	19391260	0	FALSE
AIELFSVGQGPAK+0.000	tr|K7EN82|K7EN82_HUMAN;tr|B7Z8J4|B7Z8J4_HUMAN;sp|P30419|NMT1_HUMAN;sp|P30419-2|NMT1_HUMAN	53525100	15923309	103254288	18793418	97201552	204768624	0	FALSE
NSK+0.000HEELMLGDPC+57.021LK+0.000DLK+0.000	tr|V9GYZ6|V9GYZ6_HUMAN;sp|P07814|SYEP_HUMAN	23108030	6.16407e+06	40487464	2.95303e+06	38290124	76523744	0	FALSE
ISMPDFDLHLK+0.000GPK+0.000	sp|Q09666|AHNK_HUMAN	2.16113e+06	7236121	56682216	6945774	54019176	95113264	0	FALSE
DNSTMGYM+15.995AAK+0.000	sp|P07900|HS90A_HUMAN;sp|P07900-2|HS90A_HUMAN	2.64126e+06	879895	4209098	433649	4557766	9230936	0	FALSE
ILASTQFEPTAAR+0.000	sp|Q9NZ08|ERAP1_HUMAN;sp|Q9NZ08-2|ERAP1_HUMAN	19877332	26104874	24284254	47734812	65041464	76886600	0	FALSE
ISLGMPVGPNAHK+0.000	tr|E9PPJ0|E9PPJ0_HUMAN;tr|H0YEX5|H0YEX5_HUMAN;sp|Q13435|SF3B2_HUMAN	13010068	7.11221e+06	20954452	4.12769e+06	26387744	49026540	0	FALSE
AAVATFLQSVQVPEFTPK+0.000	tr|Q5JRR6|Q5JRR6_HUMAN;sp|P22314|UBA1_HUMAN;sp|P22314-2|UBA1_HUMAN	116526280	30577126	222927200	74679952	225667840	421871328	0	FALSE
SQPEPSPVLSQLSQR+0.000	tr|A2A305|A2A305_HUMAN;sp|Q5T6F2|UBAP2_HUMAN	9847764	5.36465e+06	20937222	0	23575616	43139804	0	FALSE
GM+15.995YGIENEVFLSLPC+57.021ILNAR+0.000	sp|P07195|LDHB_HUMAN	41822896	0	13460089	33109708	0	19957964	0	FALSE
LFIGGLPNYLNDDQVK+0.000	tr|K7ENG2|K7ENG2_HUMAN;sp|P26368|U2AF2_HUMAN;sp|P26368-2|U2AF2_HUMAN	7067896	6.15456e+06	17629302	6.78744e+06	18340208	41014660	0	FALSE
LK+0.000GIEEEEILPGFILC+57.021DPNNLC+57.021HSGR+0.000	tr|H3BR35|H3BR35_HUMAN;sp|P15170|ERF3A_HUMAN;sp|P15170-2|ERF3A_HUMAN;sp|P15170-3|ERF3A_HUMAN	121503392	77341712	323619616	55825904	285807744	519304128	0	FALSE
APVNTAELTDLLIQQNHIGSVIK+0.000	sp|Q9P287|BCCIP_HUMAN;sp|Q9P287-2|BCCIP_HUMAN;sp|Q9P287-3|BCCIP_HUMAN;sp|Q9P287-4|BCCIP_HUMAN	14660961	3.8606e+06	25032164	5515351	26708062	56645236	0	FALSE
SPFVVQVGEAC+57.021NPNAC+57.021R+0.000	tr|E7EN95|E7EN95_HUMAN;sp|O75369|FLNB_HUMAN;sp|O75369-2|FLNB_HUMAN;sp|O75369-3|FLNB_HUMAN;sp|O75369-7|FLNB_HUMAN;sp|O75369-4|FLNB_HUMAN;sp|O75369-5|FLNB_HUMAN;sp|O75369-6|FLNB_HUMAN;sp|O75369-8|FLNB_HUMAN;sp|O75369-9|FLNB_HUMAN	15528995	7575164	32687420	5662568	33927248	51968096	0	FALSE
FELSC+57.021YSLAPQIK+0.000	tr|Q5T6L6|Q5T6L6_HUMAN;sp|P00966|ASSY_HUMAN	83187824	25996144	213823840	35753904	172841184	216857696	0	FALSE
NVLIFDLGGGTFDVSILTIEDGIFEVK+0.000	tr|E9PKE3|E9PKE3_HUMAN;tr|E9PN89|E9PN89_HUMAN;sp|P54652|HSP72_HUMAN;sp|P11142|HSP7C_HUMAN;sp|P11142-2|HSP7C_HUMAN	33302728	0	9302951	7.75549e+06	0	2100524	0.000829187	FALSE
AVNTQALSGAGILR+0.000	sp|O60749|SNX2_HUMAN;sp|O60749-2|SNX2_HUMAN	42146756	10635299	81925328	3.64061e+06	87936480	148064240	0	FALSE
K+0.000VTEENK+0.000ELANELR+0.000	sp|P07996|TSP1_HUMAN;sp|P07996-2|TSP1_HUMAN	196438160	0	0	1.71852e+06	1.14591	0	0.000829187	FALSE
ITSPLM+15.995EPSSIEK+0.000	sp|P28066|PSA5_HUMAN	10824461	5433762	6991091	8070704	11387699	17271084	0	FALSE
VLAMSGDPNYLHR+0.000	tr|B3KQV6|B3KQV6_HUMAN;tr|E9PH38|E9PH38_HUMAN;sp|P30153|2AAA_HUMAN	44672288	17489968	95097088	5.52874e+06	108196944	181342112	0	FALSE
NVLIFDLGGGTFDVSILTIEDGIFEVK+0.000	tr|E9PKE3|E9PKE3_HUMAN;tr|E9PN89|E9PN89_HUMAN;sp|P54652|HSP72_HUMAN;sp|P11142|HSP7C_HUMAN;sp|P11142-2|HSP7C_HUMAN	43824088	0	5.8199e+06	2.44768e+06	429003	1.91917e+06	0.000829187	FALSE
R+0.000PPSAFFLFC+57.021SEYR+0.000PK+0.000	tr|Q5T7C4|Q5T7C4_HUMAN;sp|P09429|HMGB1_HUMAN	39376072	22744116	96645152	8714495	93753864	163176736	0	FALSE
ALDVM+15.995VSTFHK+0.000	sp|P26447|S10A4_HUMAN	6643279	0	14243661	5045428	6.59102e+06	5786432	0	FALSE
AVASQLDC+57.021NFLK+0.000	tr|A0A087X2I1|A0A087X2I1_HUMAN;tr|H0YJC0|H0YJC0_HUMAN;tr|H0YJS8|H0YJS8_HUMAN;sp|P62333|PRS10_HUMAN	28215282	6.88584e+06	77764144	3.78992e+06	67277048	131803632	0	FALSE
AATAAADFTAK+0.000	sp|Q9Y3F4|STRAP_HUMAN;sp|Q9Y3F4-2|STRAP_HUMAN	78837352	14036404	170889184	23861762	173885184	347868704	0	FALSE
SLLLTTIPQIGSTEWSETLHNLK+0.000	tr|B4DUC8|B4DUC8_HUMAN;sp|Q13126|MTAP_HUMAN;sp|Q13126-2|MTAP_HUMAN;sp|Q13126-3|MTAP_HUMAN;sp|Q13126-4|MTAP_HUMAN	32691634	8806034	53609476	11062308	31860098	53793076	0	FALSE
HQGVMVGM+15.995GQK+0.000	tr|G5E9R0|G5E9R0_HUMAN;tr|C9JZR7|C9JZR7_HUMAN;tr|A0A2R8YGF8|A0A2R8YGF8_HUMAN;tr|C9JUM1|C9JUM1_HUMAN;tr|K7EM38|K7EM38_HUMAN;tr|F8WB63|F8WB63_HUMAN;tr|I3L3R2|I3L3R2_HUMAN;tr|I3L1U9|I3L1U9_HUMAN;tr|I3L3I0|I3L3I0_HUMAN;tr|C9JFL5|C9JFL5_HUMAN;tr|E7EVS6|E7EVS6_HUMAN;tr|J3KT65|J3KT65_HUMAN;tr|F6QUT6|F6QUT6_HUMAN;tr|B8ZZJ2|B8ZZJ2_HUMAN;tr|A6NL76|A6NL76_HUMAN;tr|F6UVQ4|F6UVQ4_HUMAN;tr|A0A2R8Y793|A0A2R8Y79…	138606736	35390988	260436480	22817586	232622224	578766784	0	FALSE
HFTILDAPGHK+0.000	tr|H3BSV8|H3BSV8_HUMAN;tr|H3BR35|H3BR35_HUMAN;sp|Q8IYD1|ERF3B_HUMAN;sp|P15170|ERF3A_HUMAN;sp|P15170-2|ERF3A_HUMAN;sp|P15170-3|ERF3A_HUMAN	13338570	13926485	54966024	7.78847e+06	48664436	85353752	0	FALSE
APIR+0.000PDIVNFVHTNLR+0.000	tr|H3BTP7|H3BTP7_HUMAN;tr|H3BU31|H3BU31_HUMAN;sp|P36578|RL4_HUMAN	182747920	83030552	353528640	26870302	265190592	485631680	0	FALSE
LESGM+15.995QNMSIHTK+0.000	sp|P05787|K2C8_HUMAN;sp|P05787-2|K2C8_HUMAN	33488218	3900228	22192382	14288240	23029352	50709184	0	FALSE
NFSDNQLQEGK+0.000	tr|X6RJP6|X6RJP6_HUMAN;sp|P37802|TAGL2_HUMAN;sp|P37802-2|TAGL2_HUMAN	71830848	20191274	150246160	18413348	129729280	273842080	0	FALSE
GIEK+0.000PPFELPDFIK+0.000R+0.000	tr|E9PPJ0|E9PPJ0_HUMAN;sp|Q13435|SF3B2_HUMAN	23209162	10179361	48789492	5.32119e+06	59120212	107852752	0	FALSE
DSFPNFLAC+57.021K+0.000	sp|P17568|NDUB7_HUMAN	9714956	3392171	17072320	3.38539e+06	26179202	41529640	0	FALSE
AVLFC+57.021LSEDK+0.000K+0.000	tr|G3V1A4|G3V1A4_HUMAN;tr|E9PS23|E9PS23_HUMAN;tr|E9PLJ3|E9PLJ3_HUMAN;tr|E9PQB7|E9PQB7_HUMAN;tr|E9PP50|E9PP50_HUMAN;tr|E9PK25|E9PK25_HUMAN;sp|P23528|COF1_HUMAN	303714784	124924552	745024768	79633784	638301248	1215307904	0	FALSE
DLEFTIYDDDDVSPFLEGLEER+0.000PQR+0.000K+0.000	tr|F5GX11|F5GX11_HUMAN;sp|P25786|PSA1_HUMAN;sp|P25786-2|PSA1_HUMAN	17505998	7456805	19930706	4656124	21952348	49093020	0	FALSE
ASEGPAFFPGR+0.000	sp|Q9NSD9|SYFB_HUMAN;sp|Q9NSD9-2|SYFB_HUMAN	45236012	17483320	95045496	12179158	96230184	164670272	0	FALSE
DGNASGTTLLEALDC+57.021ILPPTR+0.000PTDK+0.000PLR+0.000LPLQDVYK+0.000	tr|A0A087WV01|A0A087WV01_HUMAN;tr|A0A087WVQ9|A0A087WVQ9_HUMAN;sp|Q5VTE0|EF1A3_HUMAN;sp|P68104|EF1A1_HUMAN;sp|P68104-2|EF1A1_HUMAN	29594858	17407670	82980272	14062639	64495212	110204032	0	FALSE
ALIAAQYSGAQVR+0.000	sp|P26641|EF1G_HUMAN;sp|P26641-2|EF1G_HUMAN	27147070	5.87631e+06	31854340	31144682	32447358	53330676	0	FALSE
VLGTSVESIMATEDR+0.000	sp|P31327|CPSM_HUMAN;sp|P31327-2|CPSM_HUMAN;sp|P31327-3|CPSM_HUMAN	3310680	248618	4.41322e+06	3142446	4261984	6.82164e+06	0	FALSE
TTPDVIFVFGFR+0.000	tr|A0A2R8Y849|A0A2R8Y849_HUMAN;tr|A0A2R8Y8A0|A0A2R8Y8A0_HUMAN;tr|A0A087WUS0|A0A087WUS0_HUMAN;tr|E7ETK0|E7ETK0_HUMAN;tr|A0A2R8YD14|A0A2R8YD14_HUMAN;sp|P62847|RS24_HUMAN;sp|P62847-2|RS24_HUMAN;sp|P62847-3|RS24_HUMAN;sp|P62847-4|RS24_HUMAN	6411550	12015773	14553330	13376278	15994399	27508300	0	FALSE
FTQAGSEVSALLGR+0.000	tr|F8W0P7|F8W0P7_HUMAN;tr|H0YH81|H0YH81_HUMAN;sp|P06576|ATPB_HUMAN	32022524	85331704	319642080	2.60073e+06	323723008	567575872	0	FALSE
MVVNEGSDGGQSVYHVHLHVLGGR+0.000	sp|P49773|HINT1_HUMAN	11602421	5913500	16910466	2.12498e+06	29926916	51745988	0	FALSE
GYLGPEQLPDC+57.021LK+0.000	sp|P40926|MDHM_HUMAN;sp|P40926-2|MDHM_HUMAN	134516160	47966464	255026848	65911708	258327808	457546048	0	FALSE
SVQATTENK+0.000ELK+0.000	sp|Q13011|ECH1_HUMAN	14305462	5469925	27146048	2.8309e+06	23182262	39438696	0	FALSE
VQYTETEPYHNYR+0.000	tr|E7ERS3|E7ERS3_HUMAN;sp|Q86VM9|ZCH18_HUMAN;sp|Q86VM9-2|ZCH18_HUMAN	20124474	8796143	20400714	3.09965e+06	19029252	38248348	0	FALSE
TNEK+0.000VELQELNDR+0.000FANYIDK+0.000VR+0.000	tr|B0YJC4|B0YJC4_HUMAN;tr|A0A1B0GTT5|A0A1B0GTT5_HUMAN;sp|P08670|VIME_HUMAN	5846220	4307937	15602748	7104065	16112359	33549652	0	FALSE
VAQEK+0.000DQLQEQLQALK+0.000ESLK+0.000	tr|F5H4J1|F5H4J1_HUMAN;tr|A0A087WY61|A0A087WY61_HUMAN;sp|Q14980|NUMA1_HUMAN;sp|Q14980-2|NUMA1_HUMAN;sp|Q14980-3|NUMA1_HUMAN;sp|Q14980-4|NUMA1_HUMAN	6400336	2.91691e+06	0	63583.2	25292350	24683620	0	FALSE
SGK+0.000TELAEPIAIR+0.000PTSETVM+15.995YPAYAK+0.000	sp|P07814|SYEP_HUMAN	2979564	2.30468e+06	5.86546e+06	0	5554028	5221666	0	FALSE
AVIEHNLLSASK+0.000	tr|D6RD63|D6RD63_HUMAN;tr|D6RAX7|D6RAX7_HUMAN;tr|D6RFN0|D6RFN0_HUMAN;sp|Q9BT78|CSN4_HUMAN;sp|Q9BT78-2|CSN4_HUMAN	11771858	4.81897e+06	52207368	6647990	37577324	83287416	0	FALSE
VVIAR+0.000PTPPQAR+0.000	tr|A0A0G2JL47|A0A0G2JL47_HUMAN;tr|A0A0G2JK23|A0A0G2JK23_HUMAN;tr|H0Y7K4|H0Y7K4_HUMAN;tr|A0A0G2JIA9|A0A0G2JIA9_HUMAN;tr|H0Y759|H0Y759_HUMAN;tr|A0A0G2JJ92|A0A0G2JJ92_HUMAN;tr|A0A0G2JIB3|A0A0G2JIB3_HUMAN;tr|A0A0G2JJM1|A0A0G2JJM1_HUMAN;tr|X6REW1|X6REW1_HUMAN;tr|A0A024RCR6|A0A024RCR6_HUMAN;sp|P46379|BAG6_HUMAN;sp|P46379-2|BAG6_HUMAN;sp|P46379-3|BAG6_HUMAN;sp|P46379-4|BAG6_HUMAN;sp|P46379-5|BAG6_HUMAN	11597844	6307125	23751922	1.08283e+06	30669342	66298200	0	FALSE
NNQFQALLQYADPVSAQHAK+0.000	tr|K7EK45|K7EK45_HUMAN;tr|A0A0U1RRM4|A0A0U1RRM4_HUMAN;tr|A0A087WU68|A0A087WU68_HUMAN;tr|K7EKJ7|K7EKJ7_HUMAN;tr|A6NLN1|A6NLN1_HUMAN;sp|P26599|PTBP1_HUMAN;sp|P26599-2|PTBP1_HUMAN;sp|P26599-3|PTBP1_HUMAN	656406	4569961	1.98272e+06	1.2093e+06	10252375	8906729	0	FALSE
QQIQSIQQSIER+0.000	tr|A0A3B3IRU2|A0A3B3IRU2_HUMAN;tr|A0A3B3IUA2|A0A3B3IUA2_HUMAN;tr|B1AHD1|B1AHD1_HUMAN;sp|P55769|NH2L1_HUMAN	3138960	471534	5498861	403385	4.55708e+06	14385030	0	FALSE
TTNFAGILSQGLR+0.000	sp|P09874|PARP1_HUMAN	6164414	2.36739e+06	14853940	796731	15609321	30050048	0	FALSE
VR+0.000EEVPLELVEAHVK+0.000	sp|Q92922|SMRC1_HUMAN	4918316	2211391	10439161	0	19292462	31633754	0	FALSE
SGPFGQIFR+0.000PDNFVFGQSGAGNNWAK+0.000	tr|Q5ST81|Q5ST81_HUMAN;tr|Q5JP53|Q5JP53_HUMAN;tr|M0R1I1|M0R1I1_HUMAN;tr|M0QZL7|M0QZL7_HUMAN;tr|M0R278|M0R278_HUMAN;tr|M0QY85|M0QY85_HUMAN;sp|P04350|TBB4A_HUMAN;sp|P07437|TBB5_HUMAN;sp|Q13885|TBB2A_HUMAN;sp|P68371|TBB4B_HUMAN;sp|Q9BVA1|TBB2B_HUMAN	664446656	444014304	1519707392	318449536	1526518784	3185684992	0	FALSE
EVTDEIVK+0.000EFMTPR+0.000	sp|P23381|SYWC_HUMAN;sp|P23381-2|SYWC_HUMAN	3.97521e+06	1.53804e+06	18960994	2.1199e+06	19370614	22382616	0	FALSE
ISLPLPNFSSLNLR+0.000	tr|B0YJC4|B0YJC4_HUMAN;sp|P08670|VIME_HUMAN	8848211	3149803	15489575	3.47765e+06	9399931	16395047	0	FALSE
APLK+0.000SVGPDFGK+0.000	sp|P78527|PRKDC_HUMAN;sp|P78527-2|PRKDC_HUMAN	4877818	4.0084e+06	18863744	2.26759e+06	11937638	16709234	0	FALSE
C+57.021PFTGNVSIR+0.000	tr|M0QZC5|M0QZC5_HUMAN;sp|P62280|RS11_HUMAN	21650582	9115084	40910308	16300320	40559848	62172488	0	FALSE
GIPLATGDTSPEPELLPGAPLPPPK+0.000EVINGNIK+0.000	tr|K7EL20|K7EL20_HUMAN;tr|K7ENA8|K7ENA8_HUMAN;tr|K7ER90|K7ER90_HUMAN;tr|K7EL60|K7EL60_HUMAN;sp|O75821|EIF3G_HUMAN	46293604	33275224	60213616	86230432	81575544	190853600	0	FALSE
LIQQQLEK+0.000ELNTLR+0.000	tr|H7C4H2|H7C4H2_HUMAN;sp|Q9Y5M8|SRPRB_HUMAN	23279520	9035815	54509680	13259106	55663460	131915688	0	FALSE
NIEIDSPYEISR+0.000APDELHYTYLDTFGR+0.000PVIVAYK+0.000K+0.000	tr|B7Z4L4|B7Z4L4_HUMAN;sp|P04843|RPN1_HUMAN	12547245	5199723	23957366	3475489	34290160	62799988	0	FALSE
K+0.000LFIGGLSFETTEESLR+0.000	tr|A0A087WUI2|A0A087WUI2_HUMAN;sp|P22626|ROA2_HUMAN;sp|P22626-2|ROA2_HUMAN	4.08225e+06	2.5592e+06	10836880	195345	7.54784e+06	17697736	0	FALSE
VAPEEHPVLLTEAPLNPK+0.000	tr|G5E9R0|G5E9R0_HUMAN;tr|I3L4N8|I3L4N8_HUMAN;tr|A0A2R8YGF8|A0A2R8YGF8_HUMAN;tr|K7EM38|K7EM38_HUMAN;tr|I3L3R2|I3L3R2_HUMAN;tr|I3L1U9|I3L1U9_HUMAN;tr|I3L3I0|I3L3I0_HUMAN;tr|E7EVS6|E7EVS6_HUMAN;tr|J3KT65|J3KT65_HUMAN;tr|A0A2R8Y793|A0A2R8Y793_HUMAN;sp|P63261|ACTG_HUMAN;sp|P60709|ACTB_HUMAN	12777599	1.46775e+06	7986817	10596822	1.6736e+06	13877731	0	FALSE
LIPDSIGK+0.000DIEK+0.000	tr|D6R9B6|D6R9B6_HUMAN;tr|D6RAT0|D6RAT0_HUMAN;tr|H0Y9Y4|H0Y9Y4_HUMAN;tr|D6RG13|D6RG13_HUMAN;tr|D6RB09|D6RB09_HUMAN;sp|P61247|RS3A_HUMAN	102530208	49856228	217027152	24207452	180938768	385012640	0	FALSE
SAAEMYGSSFDLDYDFQR+0.000DYYDR+0.000	tr|G3V2D6|G3V2D6_HUMAN;tr|B2R5W2|B2R5W2_HUMAN;tr|G3V251|G3V251_HUMAN;tr|G3V4W0|G3V4W0_HUMAN;tr|G3V4C1|G3V4C1_HUMAN;tr|B4DY08|B4DY08_HUMAN;sp|P07910-2|HNRPC_HUMAN;sp|P07910-4|HNRPC_HUMAN	9292401	10474515	8535114	0	7.12451e+06	13715627	0	FALSE
SLDM+15.995DSIIAEVK+0.000	tr|F8VUG2|F8VUG2_HUMAN;sp|P05787|K2C8_HUMAN;sp|P05787-2|K2C8_HUMAN	45729428	11767972	65629880	1.13644e+06	49277080	132741176	0	FALSE
LDVGNFSWGSEC+57.021C+57.021TR+0.000K+0.000	sp|P62241|RS8_HUMAN	4.37058e+06	3.59521e+06	20020732	4235137	23219040	44382312	0	FALSE
ADLGVSGPK+0.000VDIDVPDVNLEAPEGK+0.000	sp|Q09666|AHNK_HUMAN	40048148	18176618	110590360	22117888	87382472	147655952	0	FALSE
LLASAGQDNVVR+0.000	tr|H7BY83|H7BY83_HUMAN;sp|Q5JSH3|WDR44_HUMAN;sp|Q5JSH3-2|WDR44_HUMAN;sp|Q5JSH3-3|WDR44_HUMAN;sp|Q5JSH3-4|WDR44_HUMAN	5630933	2.05276e+06	13400665	2.82962e+06	11169549	23597372	0	FALSE
AM+15.995GIMNSFVNDIFER+0.000	tr|U3KQK0|U3KQK0_HUMAN;sp|Q99877|H2B1N_HUMAN;sp|P23527|H2B1O_HUMAN;sp|P57053|H2BFS_HUMAN;sp|P62807|H2B1C_HUMAN;sp|P58876|H2B1D_HUMAN;sp|Q5QNW6|H2B2F_HUMAN;sp|Q5QNW6-2|H2B2F_HUMAN;sp|P06899|H2B1J_HUMAN;sp|O60814|H2B1K_HUMAN;sp|Q16778|H2B2E_HUMAN;sp|Q93079|H2B1H_HUMAN;sp|Q8N257|H2B3B_HUMAN;sp|P33778|H2B1B_HUMAN;sp|Q99880|H2B1L_HUMAN;sp|Q99879|H2B1M_HUMAN	0	2.59231e+06	15856338	0	7.1209e+06	21706032	0	FALSE
K+0.000QELEEIC+57.021HDLEAR+0.000	sp|P35579|MYH9_HUMAN;sp|P35579-2|MYH9_HUMAN	45793176	19675536	121011072	10072339	103518984	201673344	0	FALSE
GSTDNLM+15.995DDIER+0.000AVDDGVNTFK+0.000	sp|P50990|TCPQ_HUMAN;sp|P50990-2|TCPQ_HUMAN;sp|P50990-3|TCPQ_HUMAN	3094500	1861901	5.23015e+06	1.70798e+06	6907312	15179851	0	FALSE
EAVAMESYAK+0.000	tr|F5GWF6|F5GWF6_HUMAN;sp|P78371|TCPB_HUMAN;sp|P78371-2|TCPB_HUMAN	13413229	3.82252e+06	24248882	65515872	15869640	64197556	0	FALSE
TTPTGWTLDQC+57.021IQTGVDNPGHPFIK+0.000	tr|F8WCN3|F8WCN3_HUMAN;tr|C9JSQ1|C9JSQ1_HUMAN;tr|C9J6W7|C9J6W7_HUMAN;tr|C9J995|C9J995_HUMAN;tr|C9JJX8|C9JJX8_HUMAN;tr|C9JT96|C9JT96_HUMAN;tr|C9J8F6|C9J8F6_HUMAN;sp|P12532|KCRU_HUMAN;sp|P12532-2|KCRU_HUMAN	15539283	4.89847e+06	25861052	11143983	23272794	40211684	0.000541392	FALSE
MTIGHLIEC+57.021LQGK+0.000	tr|C9J2Y9|C9J2Y9_HUMAN;tr|A0A1W2PPT5|A0A1W2PPT5_HUMAN;tr|C9J4M6|C9J4M6_HUMAN;sp|P30876|RPB2_HUMAN	3097375	1.11206e+06	4.6444e+06	605994	7485471	15420989	0	FALSE
LDIK+0.000LDSEDK+0.000DK+0.000EGK+0.000PLLK+0.000	sp|P13639|EF2_HUMAN	33700404	12696325	65620976	3.59149e+06	70157528	140534288	0	FALSE
HNIAYFPQIVSVAAR+0.000	tr|K7ENV7|K7ENV7_HUMAN;tr|K7EKW4|K7EKW4_HUMAN;sp|Q96AB3|ISOC2_HUMAN;sp|Q96AB3-2|ISOC2_HUMAN;sp|Q96AB3-3|ISOC2_HUMAN	20816322	6.33993e+06	33372412	1.07327e+06	16258619	28678994	0	FALSE
TATSLAEGLSLVVSPDSIHSVAPENEGR+0.000	sp|Q9BTV4|TMM43_HUMAN	15047015	0	891918	5.45141e+06	0	3.25369e+06	0	FALSE
LLTSFLPAQLLR+0.000	tr|J3KPF3|J3KPF3_HUMAN;tr|F5GZS6|F5GZS6_HUMAN;tr|H0YFX4|H0YFX4_HUMAN;sp|P08195|4F2_HUMAN;sp|P08195-2|4F2_HUMAN;sp|P08195-3|4F2_HUMAN;sp|P08195-4|4F2_HUMAN	2.88479e+06	922649	9077668	123383	8.14766e+06	12246065	0	FALSE
IFANTPDSGC+57.021VLGMR+0.000	tr|F8VZI0|F8VZI0_HUMAN;tr|A0A2R8Y891|A0A2R8Y891_HUMAN;sp|P08237|PFKAM_HUMAN;sp|P08237-2|PFKAM_HUMAN;sp|P08237-3|PFKAM_HUMAN	9838838	3.94621e+06	27042694	212125	21527658	35336920	0	FALSE
VAAK+0.000LEVAPISDIIAIK+0.000SPDTFVR+0.000	tr|H0YL12|H0YL12_HUMAN;tr|H0YKF0|H0YKF0_HUMAN;tr|H0YK49|H0YK49_HUMAN;tr|H0YNX6|H0YNX6_HUMAN;tr|H0YLU7|H0YLU7_HUMAN;sp|P13804|ETFA_HUMAN;sp|P13804-2|ETFA_HUMAN	4527831	1.80513e+06	16859928	1802546	15319830	29366856	0	FALSE
VGETIIDLENR+0.000	tr|H0YD14|H0YD14_HUMAN;sp|Q9NZM1|MYOF_HUMAN;sp|Q9NZM1-2|MYOF_HUMAN;sp|Q9NZM1-3|MYOF_HUMAN;sp|Q9NZM1-6|MYOF_HUMAN	16904442	9736107	39053588	847077	33103190	99015744	0	FALSE
YGIVDYMIEQSGPPSK+0.000EILTLK+0.000	sp|P13667|PDIA4_HUMAN	20830164	15557276	73182760	16149697	66755308	133993520	0	FALSE
VQELETSLAELR+0.000	tr|A0A2Q2TH77|A0A2Q2TH77_HUMAN;tr|B7ZC06|B7ZC06_HUMAN;sp|Q08379|GOGA2_HUMAN;sp|Q08379-2|GOGA2_HUMAN	14060826	1.44327e+06	23260156	15271734	22102714	55555432	0	FALSE
AMGIM+15.995NSFVNDIFER+0.000	tr|U3KQK0|U3KQK0_HUMAN;sp|Q99877|H2B1N_HUMAN;sp|P23527|H2B1O_HUMAN;sp|P57053|H2BFS_HUMAN;sp|P62807|H2B1C_HUMAN;sp|P58876|H2B1D_HUMAN;sp|Q5QNW6|H2B2F_HUMAN;sp|Q5QNW6-2|H2B2F_HUMAN;sp|P06899|H2B1J_HUMAN;sp|O60814|H2B1K_HUMAN;sp|Q16778|H2B2E_HUMAN;sp|Q93079|H2B1H_HUMAN;sp|Q8N257|H2B3B_HUMAN;sp|P33778|H2B1B_HUMAN;sp|Q99880|H2B1L_HUMAN;sp|Q99879|H2B1M_HUMAN	0	15166584	17301046	14687900	7.67193e+06	42120304	0	FALSE
TAWVFDDK+0.000YK+0.000	tr|G3V4T5|G3V4T5_HUMAN;tr|H0YJS4|H0YJS4_HUMAN;sp|P05198|IF2A_HUMAN	12379146	4.18869e+06	27425246	2144951	23682738	46915200	0	FALSE
AK+0.000LVILANNC+57.021PALR+0.000	tr|E5RJH3|E5RJH3_HUMAN;tr|E5RI99|E5RI99_HUMAN;sp|P62888|RL30_HUMAN	25059664	8.15024e+06	47117552	1.47135e+06	38248188	67902520	0	FALSE
FAEHGETLAMK+0.000	tr|A0A0B4J1W3|A0A0B4J1W3_HUMAN;sp|Q6N069|NAA16_HUMAN;sp|Q6N069-2|NAA16_HUMAN;sp|Q6N069-3|NAA16_HUMAN;sp|Q6N069-4|NAA16_HUMAN;sp|Q6N069-5|NAA16_HUMAN;sp|Q9BXJ9|NAA15_HUMAN;sp|Q9BXJ9-4|NAA15_HUMAN	15382928	10311929	36519424	2.95059e+06	36009048	85719024	0	FALSE
ADFC+57.021IIHYAGK+0.000	sp|P35580|MYH10_HUMAN;sp|P35580-2|MYH10_HUMAN;sp|P35580-3|MYH10_HUMAN;sp|P35580-4|MYH10_HUMAN;sp|P35580-5|MYH10_HUMAN;sp|P35579|MYH9_HUMAN;sp|P35579-2|MYH9_HUMAN	27953486	6.22896e+06	51404776	4.29251e+06	57918924	107645144	0	FALSE
QAQIEVVPSASALIIK+0.000	sp|P30050|RL12_HUMAN	69936048	29466874	144163216	31110390	132328480	245245888	0	FALSE
TQEGDILLFC+57.021K+0.000	tr|H7C0E8|H7C0E8_HUMAN;tr|A0A067XG54|A0A067XG54_HUMAN;sp|Q8NB49|AT11C_HUMAN;sp|Q8NB49-2|AT11C_HUMAN;sp|Q8NB49-3|AT11C_HUMAN;sp|Q8NB49-4|AT11C_HUMAN	8422188	11805767	10093882	16207281	18418272	20568578	0	FALSE
DVDFELIK+0.000VEGK+0.000	tr|E9PCA1|E9PCA1_HUMAN;tr|E7ENZ3|E7ENZ3_HUMAN;tr|B7ZAR1|B7ZAR1_HUMAN;sp|P48643|TCPE_HUMAN;sp|P48643-2|TCPE_HUMAN	134345920	53520136	331719488	31755000	343380736	719697856	0	FALSE
SLYYYIQQDTK+0.000GDYQK+0.000	sp|P07355|ANXA2_HUMAN;sp|P07355-2|ANXA2_HUMAN;sp|A6NMY6|AXA2L_HUMAN	75608528	28420966	189027472	21549138	200690448	449126144	0	FALSE
NVQAEEMVEFSSGLK+0.000	tr|K7EQH4|K7EQH4_HUMAN;tr|K7EK77|K7EK77_HUMAN;tr|K7ERX7|K7ERX7_HUMAN;tr|K7EJP1|K7EJP1_HUMAN;sp|P25705|ATPA_HUMAN;sp|P25705-2|ATPA_HUMAN;sp|P25705-3|ATPA_HUMAN	23671032	17577660	67765440	9235375	76373960	141549760	0	FALSE
GSQFGQSC+57.021C+57.021LR+0.000	tr|V9GYZ6|V9GYZ6_HUMAN;sp|P07814|SYEP_HUMAN	26102646	11942359	61386268	5.03114e+06	70090048	87261592	0	FALSE
AQTLPTSVVTITSESSPGK+0.000R+0.000	tr|A0A087WUZ3|A0A087WUZ3_HUMAN;sp|Q01082|SPTB2_HUMAN	45684208	11905551	59258680	6.59995e+06	52971592	133614280	0	FALSE
IISDNLTYC+57.021K+0.000	tr|H7BZ72|H7BZ72_HUMAN;sp|Q9Y2X3|NOP58_HUMAN	66385508	23055724	105405208	37225416	172584816	47937672	0	FALSE
SLDM+15.995DSIIAEVK+0.000	tr|F8VUG2|F8VUG2_HUMAN;sp|P05787|K2C8_HUMAN;sp|P05787-2|K2C8_HUMAN	51617072	16640295	82402112	10718542	56168504	157513968	0	FALSE
TLPLTGSTFHDQIAMLSHR+0.000	sp|P55265|DSRAD_HUMAN;sp|P55265-4|DSRAD_HUMAN;sp|P55265-5|DSRAD_HUMAN	931687	975304	8.34433e+06	0	11869830	15750028	0	FALSE
TYNR+0.000VPLHK+0.000PTDWQK+0.000	tr|F8W7Q4|F8W7Q4_HUMAN;tr|E9PH05|E9PH05_HUMAN;sp|Q96A26|F162A_HUMAN	33201872	12907510	77284888	9555028	93734248	161814224	0	FALSE
SNNVEMDWVLK+0.000	tr|E5RGV0|E5RGV0_HUMAN;tr|D6RJ04|D6RJ04_HUMAN;tr|D6R9T0|D6R9T0_HUMAN;tr|D6RIH9|D6RIH9_HUMAN;tr|D6RFM3|D6RFM3_HUMAN;tr|D6RBM0|D6RBM0_HUMAN;tr|D6RAM1|D6RAM1_HUMAN;tr|E9PCY7|E9PCY7_HUMAN;tr|G8JLB6|G8JLB6_HUMAN;tr|D6RIU0|D6RIU0_HUMAN;tr|D6RIT2|D6RIT2_HUMAN;tr|D6RDU3|D6RDU3_HUMAN;tr|H0YAQ2|H0YAQ2_HUMAN;tr|E7EQJ0|E7EQJ0_HUMAN;tr|E5RGH4|E5RGH4_HUMAN;sp|P31943|HNRH1_HUMAN	72256712	24759138	169419920	22612694	172225296	355035392	0	FALSE
TISTSDPAEVLVK+0.000	tr|E5RJU9|E5RJU9_HUMAN;sp|Q86UE4|LYRIC_HUMAN	22563190	5.38027e+06	37215348	4637192	36698276	61358512	0	FALSE
LEQGYELQFR+0.000	sp|P35573|GDE_HUMAN	25866298	9429414	59594984	1.2772e+06	46950588	65049312	0	FALSE
DQLIYLLEQLPGK+0.000K+0.000	tr|A0A2R8YDQ0|A0A2R8YDQ0_HUMAN;tr|G3V3F9|G3V3F9_HUMAN;sp|Q9H267|VP33B_HUMAN	5.9603e+06	2.40033e+06	9617871	0	10869904	16932874	0	FALSE
VAHALAEGLGVIAC+57.021IGEK+0.000	tr|U3KQF3|U3KQF3_HUMAN;tr|U3KPZ0|U3KPZ0_HUMAN;sp|P60174|TPIS_HUMAN;sp|P60174-1|TPIS_HUMAN;sp|P60174-4|TPIS_HUMAN	15748593	5.3905e+06	32831606	6.16474e+06	31331066	65074628	0	FALSE
TK+0.000PYIQVDIGGGQTK+0.000	sp|P11021|BIP_HUMAN	27661472	12992379	79492840	8356091	72008504	161738656	0	FALSE
FNQTYQLAHGTAEEK+0.000	sp|Q14166|TTL12_HUMAN	8.29924e+06	6541273	28920392	4.52622e+06	27010784	43015300	0	FALSE
TYTDELTPIESAVSVFK+0.000	sp|O75489|NDUS3_HUMAN	32219342	7.72133e+06	33200852	20275966	42559268	62295536	0	FALSE
QVDQLTNDK+0.000AR+0.000	tr|B0YJC4|B0YJC4_HUMAN;sp|P08670|VIME_HUMAN	18705486	41141332	25380716	4586002	17006322	29766650	0	FALSE
LK+0.000QQSELQSQVR+0.000	tr|C9J9W2|C9J9W2_HUMAN;sp|Q14847|LASP1_HUMAN;sp|Q14847-2|LASP1_HUMAN	22013338	5.93902e+06	50615368	7059605	43205708	96971184	0	FALSE
C+57.021DENILWLDYK+0.000	tr|B4DNK4|B4DNK4_HUMAN;tr|H3BQ34|H3BQ34_HUMAN;tr|H3BTJ2|H3BTJ2_HUMAN;tr|H3BTN5|H3BTN5_HUMAN;tr|H3BUW1|H3BUW1_HUMAN;sp|P14618|KPYM_HUMAN;sp|P14618-2|KPYM_HUMAN;sp|P14618-3|KPYM_HUMAN	9345998	1.73615e+06	23650542	3647446	18922878	39213544	0	FALSE
DYAFVHFEDR+0.000	tr|B4DT28|B4DT28_HUMAN;tr|A0A286YEZ8|A0A286YEZ8_HUMAN;sp|O43390|HNRPR_HUMAN;sp|O43390-2|HNRPR_HUMAN;sp|O43390-3|HNRPR_HUMAN;sp|O43390-4|HNRPR_HUMAN	1838449	741413	3.15481e+06	764755	2.85292e+06	9618126	0	FALSE
LR+0.000EVVETPLLHPER+0.000	tr|A0A1W2PQS1|A0A1W2PQS1_HUMAN;sp|P35998|PRS7_HUMAN;sp|P35998-2|PRS7_HUMAN	3.57979e+06	3.0309e+06	17541364	637018	22048362	52800640	0	FALSE
FLPR+0.000EEGPYEVEVTYDGVPVPGSPFPLEAVAPTK+0.000PSK+0.000	tr|Q60FE5|Q60FE5_HUMAN;tr|A0A087WWY3|A0A087WWY3_HUMAN;sp|P21333|FLNA_HUMAN;sp|P21333-2|FLNA_HUMAN	134466704	64205544	228211072	38431988	232944448	475519008	0	FALSE
APIR+0.000PDIVNFVHTNLR+0.000	tr|H3BTP7|H3BTP7_HUMAN;tr|H3BU31|H3BU31_HUMAN;sp|P36578|RL4_HUMAN	133496872	61610660	248335840	18703492	276310784	379513888	0	FALSE
NQVALNPQNTVFDAK+0.000R+0.000	tr|A0A0G2JIW1|A0A0G2JIW1_HUMAN;sp|P0DMV9|HS71B_HUMAN;sp|P0DMV8|HS71A_HUMAN;sp|P0DMV8-2|HS71A_HUMAN	0	505190	11085503	0	4.16906e+06	11224999	0	FALSE
TQLASWSDPTEETGPVAGILDTETLEK+0.000	tr|H0YDN1|H0YDN1_HUMAN;sp|Q15149|PLEC_HUMAN;sp|Q15149-2|PLEC_HUMAN;sp|Q15149-3|PLEC_HUMAN;sp|Q15149-4|PLEC_HUMAN;sp|Q15149-5|PLEC_HUMAN;sp|Q15149-6|PLEC_HUMAN;sp|Q15149-7|PLEC_HUMAN;sp|Q15149-8|PLEC_HUMAN;sp|Q15149-9|PLEC_HUMAN	44162160	11072985	78599600	27028228	88970808	188542880	0	FALSE
YLDEIVK+0.000EVEAK+0.000	sp|P12270|TPR_HUMAN;sp|P12270-2|TPR_HUMAN	7913051	4.92425e+06	18734478	2.57374e+06	23531466	38845124	0	FALSE
VTPGFEEK+0.000EGELLVR+0.000	tr|A0A3B3ISK9|A0A3B3ISK9_HUMAN;tr|F5H755|F5H755_HUMAN;tr|F5H362|F5H362_HUMAN;tr|F5H5A1|F5H5A1_HUMAN;sp|Q4G176|ACSF3_HUMAN	7930402	5.13989e+06	22368322	4.14498e+06	22789144	39568264	0	FALSE
GGGGR+0.000GGGGGGGGGGGR+0.000APAVK+0.000	XXX_tr|A0A0D9SGA5|A0A0D9SGA5_HUMAN	11261655	324668	959425	725642	0	0	0.00148208	TRUE
NAGNC+57.021LSPAVIVGLLK+0.000	tr|A0A2C9F2M7|A0A2C9F2M7_HUMAN;tr|A0A286YF22|A0A286YF22_HUMAN;sp|O43175|SERA_HUMAN	9303063	15090934	24581352	32740986	37202432	52650944	0	FALSE
YGEYFPGTGDLR+0.000	tr|Q5TEE2|Q5TEE2_HUMAN;sp|Q92769|HDAC2_HUMAN;sp|Q92769-3|HDAC2_HUMAN;sp|Q13547|HDAC1_HUMAN	35454776	12422177	58502396	3.97926e+06	77461640	144596304	0	FALSE
MWDPHNDPNAQGDAFK+0.000	tr|M0QYR1|M0QYR1_HUMAN;sp|P08621|RU17_HUMAN;sp|P08621-2|RU17_HUMAN;sp|P08621-3|RU17_HUMAN	14774056	3.72286e+06	29724764	13488703	33248068	63870636	0	FALSE
ATTPVIM+15.995VGPGTGVAPFIGFIQER+0.000	tr|E7EMD0|E7EMD0_HUMAN;tr|H0Y4R2|H0Y4R2_HUMAN;sp|P16435|NCPR_HUMAN	19325632	2192070	30027422	4708356	25251816	55679400	0	FALSE
AATENIPVVR+0.000	tr|A0A3B3IRP5|A0A3B3IRP5_HUMAN;tr|A0A2R8Y640|A0A2R8Y640_HUMAN;tr|A0A2R8YHB3|A0A2R8YHB3_HUMAN;tr|A0A1B0GUB2|A0A1B0GUB2_HUMAN;sp|Q6P1J9|CDC73_HUMAN	15782819	7.47783e+06	29564264	11948657	38938420	65734900	0	FALSE
ILLQGTPVAQMTEDAVDAER+0.000LK+0.000	sp|P01024|CO3_HUMAN	13468052	0	0	0	371863	161326	0.001274	FALSE
VSFTGSVPTGMK+0.000	sp|P49189|AL9A1_HUMAN;sp|P49189-2|AL9A1_HUMAN;sp|P49189-3|AL9A1_HUMAN	43712212	15963751	62597772	13163513	75159456	127686616	0	FALSE
INISEGNC+57.021PER+0.000	tr|E9PFP8|E9PFP8_HUMAN;tr|F8VZX2|F8VZX2_HUMAN;tr|F8VXH9|F8VXH9_HUMAN;tr|F8W0G4|F8W0G4_HUMAN;tr|J3QT27|J3QT27_HUMAN;tr|F8VTZ0|F8VTZ0_HUMAN;tr|F8W1G6|F8W1G6_HUMAN;tr|H3BRU6|H3BRU6_HUMAN;sp|Q15366|PCBP2_HUMAN;sp|Q15366-2|PCBP2_HUMAN;sp|Q15366-3|PCBP2_HUMAN;sp|Q15366-4|PCBP2_HUMAN;sp|Q15366-5|PCBP2_HUMAN;sp|Q15366-6|PCBP2_HUMAN;sp|Q15366-7|PCBP2_HUMAN;sp|Q15366-8|PCBP2_HUMAN;sp|Q15365|PCBP1_HUMAN;sp|…	379449440	143499632	774665216	68976776	803039168	1484060928	0	FALSE
TINLYPLTNYTFGTK+0.000	sp|O43809|CPSF5_HUMAN	10538057	3595161	15967249	2.61174e+06	12560495	31067668	0	FALSE
TTYLVLDEADR+0.000	tr|J3KTA4|J3KTA4_HUMAN;tr|J3KRZ1|J3KRZ1_HUMAN;tr|J3QSF1|J3QSF1_HUMAN;sp|P17844|DDX5_HUMAN;sp|P17844-2|DDX5_HUMAN	100218944	63603284	219902048	6.95314e+06	231447904	525238880	0	FALSE
NLDVQLLDTK+0.000R+0.000	sp|P12270|TPR_HUMAN	15676630	4319935	32481706	4291848	40058604	69754448	0	FALSE
MIEDAER+0.000DGTLK+0.000PGDTIIEPTSGNTGIGLALAAAVR+0.000	tr|C9JMA6|C9JMA6_HUMAN;sp|P35520|CBS_HUMAN;sp|P35520-2|CBS_HUMAN;sp|P0DN79|CBSL_HUMAN	19809468	8645806	46067912	3.68485e+06	44372784	52531380	0	FALSE
ELSANTAAFAK+0.000	sp|O60749|SNX2_HUMAN;sp|O60749-2|SNX2_HUMAN	16558841	5869155	33173782	3.65113e+06	32946734	69505008	0	FALSE
ADTQTYQPYNK+0.000DWIK+0.000	sp|P84090|ERH_HUMAN	21842748	10547692	53990880	6.48076e+06	56674940	97874392	0	FALSE
ADVIQATGDAIC+57.021IFR+0.000	tr|E9PMD4|E9PMD4_HUMAN;sp|Q08945|SSRP1_HUMAN	13284967	6.41394e+06	28462596	2.48892e+06	26110608	44551440	0	FALSE
HDADGQATLLNLLLR+0.000	sp|O43242|PSMD3_HUMAN;sp|O43242-2|PSMD3_HUMAN	14464164	4087142	34746292	0	26654590	54689448	0	FALSE
HTLGHLLSLDSYR+0.000	sp|Q02809|PLOD1_HUMAN;sp|Q02809-2|PLOD1_HUMAN	1.89417e+06	430292	4121941	4.04239e+06	9507341	15100671	0	FALSE
ELQNAPDAIPESGVEPPALDTAWVEATR+0.000K+0.000	tr|C9JFE4|C9JFE4_HUMAN;tr|A8K070|A8K070_HUMAN;tr|A0A096LP07|A0A096LP07_HUMAN;tr|J3KRJ4|J3KRJ4_HUMAN;tr|J3KTB0|J3KTB0_HUMAN;tr|J3KSA5|J3KSA5_HUMAN;tr|J3QLT0|J3QLT0_HUMAN;tr|J3QS88|J3QS88_HUMAN;tr|A0A096LPJ3|A0A096LPJ3_HUMAN;sp|Q13098|CSN1_HUMAN;sp|Q13098-5|CSN1_HUMAN;sp|Q13098-7|CSN1_HUMAN	2.89616e+06	3.28442e+06	8999260	2984313	5.3873e+06	11565323	0	FALSE
IHTEPQLSAALEYVR+0.000	tr|A0A0U1RQU2|A0A0U1RQU2_HUMAN;tr|A0A0U1RQE9|A0A0U1RQE9_HUMAN;tr|A0A0U1RQM8|A0A0U1RQM8_HUMAN;tr|A0A0U1RQL2|A0A0U1RQL2_HUMAN;tr|A0A0U1RQT0|A0A0U1RQT0_HUMAN;tr|A0A1B0GVU9|A0A1B0GVU9_HUMAN;tr|A0A0U1RRI9|A0A0U1RRI9_HUMAN;sp|P47897|SYQ_HUMAN	9037511	60098.5	13570774	365806	14370345	28698960	0	FALSE
GVVQELQQAISK+0.000	tr|E9PL12|E9PL12_HUMAN;tr|E9PK01|E9PK01_HUMAN;tr|E9PRY8|E9PRY8_HUMAN;tr|E9PIZ1|E9PIZ1_HUMAN;tr|E9PN91|E9PN91_HUMAN;tr|H0YCK7|H0YCK7_HUMAN;tr|E9PMW7|E9PMW7_HUMAN;tr|E9PPR1|E9PPR1_HUMAN;tr|A0A087X1X7|A0A087X1X7_HUMAN;tr|E9PL71|E9PL71_HUMAN;tr|E9PQ49|E9PQ49_HUMAN;tr|E9PI39|E9PI39_HUMAN;sp|P29692|EF1D_HUMAN;sp|P29692-2|EF1D_HUMAN;sp|P29692-3|EF1D_HUMAN	236543952	81558864	467616256	59522456	400914784	828360384	0	FALSE
R+0.000VNQAIWLLC+57.021TGAR+0.000	tr|M0R0R2|M0R0R2_HUMAN;tr|M0R0F0|M0R0F0_HUMAN;tr|M0QZN2|M0QZN2_HUMAN;sp|P46782|RS5_HUMAN	17591590	6775888	41903336	2.46677e+06	29820810	63039612	0	FALSE
SGPFGQIFR+0.000PDNFVFGQSGAGNNWAK+0.000	tr|Q5ST81|Q5ST81_HUMAN;tr|Q5JP53|Q5JP53_HUMAN;tr|M0R1I1|M0R1I1_HUMAN;tr|M0QZL7|M0QZL7_HUMAN;tr|M0R278|M0R278_HUMAN;tr|M0QY85|M0QY85_HUMAN;sp|P04350|TBB4A_HUMAN;sp|P07437|TBB5_HUMAN;sp|Q13885|TBB2A_HUMAN;sp|P68371|TBB4B_HUMAN;sp|Q9BVA1|TBB2B_HUMAN	34825620	12260934	18040576	788136	6374120	14230518	0	FALSE
GHEGPVWQVAWAHPMYGNILASC+57.021SYDR+0.000K+0.000	tr|E7ERC8|E7ERC8_HUMAN;tr|A8MXL6|A8MXL6_HUMAN;sp|P55735|SEC13_HUMAN;sp|P55735-2|SEC13_HUMAN;sp|P55735-3|SEC13_HUMAN;sp|P55735-4|SEC13_HUMAN	6.37579e+06	3.0686e+06	17451938	3771132	26262502	38674672	0	FALSE
AR+0.000PFPDGLAEDIDK+0.000GEVSAR+0.000QELK+0.000	sp|P13639|EF2_HUMAN	7450286	3.94356e+06	15483773	120.788	0	32575364	0	FALSE
APIR+0.000PDIVNFVHTNLR+0.000	tr|H3BTP7|H3BTP7_HUMAN;tr|H3BU31|H3BU31_HUMAN;sp|P36578|RL4_HUMAN	75183704	63391496	242989248	11177993	70353120	209428992	0	FALSE
YGYTHLSTGDLLR+0.000	tr|Q5T9B7|Q5T9B7_HUMAN;sp|P00568|KAD1_HUMAN	36838288	5753089	62118388	1.79008e+06	47234020	94287840	0	FALSE
VATPVDWK+0.000DGDSVM+15.995VLPTIPEEEAK+0.000	sp|P30041|PRDX6_HUMAN	52226188	30032162	109114120	24094152	83990368	180709424	0	FALSE
INSGGK+0.000LPNFGFVVFDDSEPVQK+0.000	sp|Q13283|G3BP1_HUMAN	9478376	6080005	2445769	1.62631e+06	4.2452e+06	7227034	0	FALSE
FFTEEVDSR+0.000	sp|Q9H845|ACAD9_HUMAN	20429234	4546676	41211020	0	31863958	65369436	0	FALSE
SGPFGQIFR+0.000PDNFVFGQSGAGNNWAK+0.000	tr|Q5ST81|Q5ST81_HUMAN;tr|Q5JP53|Q5JP53_HUMAN;tr|M0R1I1|M0R1I1_HUMAN;tr|M0QZL7|M0QZL7_HUMAN;tr|M0R278|M0R278_HUMAN;tr|M0QY85|M0QY85_HUMAN;sp|P04350|TBB4A_HUMAN;sp|P07437|TBB5_HUMAN;sp|Q13885|TBB2A_HUMAN;sp|P68371|TBB4B_HUMAN;sp|Q9BVA1|TBB2B_HUMAN	9919827	8449372	23735030	3.65658e+06	21251588	53067124	0	FALSE
GPASVPSVGK+0.000	tr|E7ETY2|E7ETY2_HUMAN;tr|H0Y8Y7|H0Y8Y7_HUMAN;tr|A0A3B3IS06|A0A3B3IS06_HUMAN;tr|J3KQ96|J3KQ96_HUMAN;sp|Q13428|TCOF_HUMAN;sp|Q13428-2|TCOF_HUMAN;sp|Q13428-3|TCOF_HUMAN;sp|Q13428-4|TCOF_HUMAN;sp|Q13428-5|TCOF_HUMAN;sp|Q13428-6|TCOF_HUMAN;sp|Q13428-7|TCOF_HUMAN;sp|Q13428-8|TCOF_HUMAN	23555998	4450786	43124272	5230410	47492776	85322104	0	FALSE
SLFSSIGEVESAK+0.000	tr|M0QZR9|M0QZR9_HUMAN;sp|Q15717|ELAV1_HUMAN;sp|Q15717-2|ELAV1_HUMAN	50534304	59737056	211660480	25969208	221738592	456988768	0	FALSE
FLTPIYHPNIDSAGR+0.000	sp|Q9NPD8|UBE2T_HUMAN	17822162	3671072	10897317	1.24476e+06	51315912	63810860	0	FALSE
SGAR+0.000HSVGGGGAAAPAGQPGGGPM+15.995	XXX_tr|A0A075B6Q7|A0A075B6Q7_HUMAN;XXX_tr|Q5T409|Q5T409_HUMAN;XXX_tr|A0A087WYX6|A0A087WYX6_HUMAN;XXX_tr|C4P0A0|C4P0A0_HUMAN;XXX_tr|C4P093|C4P093_HUMAN;XXX_tr|C4P0B0|C4P0B0_HUMAN;XXX_tr|C4P0B1|C4P0B1_HUMAN;XXX_tr|C4P092|C4P092_HUMAN;XXX_sp|Q9NRI5|DISC1_HUMAN;XXX_sp|Q9NRI5-2|DISC1_HUMAN;XXX_sp|Q9NRI5-3|DISC1_HUMAN;XXX_sp|Q9NRI5-4|DISC1_HUMAN;XXX_sp|Q9NRI5-5|DISC1_HUMAN;XXX_sp|Q9NRI5-6|DISC1_HUMAN;X…	847119552	22293130	7076275	1.55463e+06	0	807740	0.00276656	TRUE
TYAFSENPLPTVEIAIR+0.000	tr|A0A0G2JRV3|A0A0G2JRV3_HUMAN;tr|G5E975|G5E975_HUMAN;sp|Q12824|SNF5_HUMAN;sp|Q12824-2|SNF5_HUMAN	6.64355e+06	4920109	4.09817e+06	798918	7696610	12698879	0	FALSE
FVDGLMIHSGDPVNYYVDTAVR+0.000	tr|H0YEU2|H0YEU2_HUMAN;tr|E9PL09|E9PL09_HUMAN;tr|E9PSF4|E9PSF4_HUMAN;sp|P23396|RS3_HUMAN;sp|P23396-2|RS3_HUMAN	9827120	0	13971739	1.70963e+06	10803629	24138830	0	FALSE
YQLDK+0.000DGVVLFK+0.000	tr|I3L398|I3L398_HUMAN;tr|H7BZ94|H7BZ94_HUMAN;tr|I3L312|I3L312_HUMAN;tr|I3L3U6|I3L3U6_HUMAN;sp|P07237|PDIA1_HUMAN	19665312	0	23268500	4621951	17966162	50090844	0	FALSE
GMNFSVVVFDTAPTGHTLR+0.000	tr|A0A087WXS7|A0A087WXS7_HUMAN;tr|K7ERW9|K7ERW9_HUMAN;sp|O43681|ASNA_HUMAN	7982030	1.4369e+06	15362274	219468	13182456	25500598	0	FALSE
TVTAMDVVYALK+0.000R+0.000	sp|P62805|H4_HUMAN	1685773	1343844	2.24858e+06	0	2.38017e+06	4.92987e+06	0	FALSE
VTYHPDGPEGQAYDVDFTPPFR+0.000R+0.000	sp|Q15046|SYK_HUMAN;sp|Q15046-2|SYK_HUMAN	23186162	10971565	48979516	12741892	53980912	94243744	0	FALSE
LC+57.021FLDK+0.000VEPHATIAEIK+0.000	tr|M0R2N5|M0R2N5_HUMAN;tr|M0R3C3|M0R3C3_HUMAN;sp|Q9NZ01|TECR_HUMAN	7606924	4.1159e+06	28740458	4707487	32845982	46109240	0	FALSE
VQVEYK+0.000GETK+0.000	tr|E9PN25|E9PN25_HUMAN;tr|E9PKE3|E9PKE3_HUMAN;tr|E9PQQ4|E9PQQ4_HUMAN;tr|E9PLF4|E9PLF4_HUMAN;tr|E9PN89|E9PN89_HUMAN;tr|E9PPY6|E9PPY6_HUMAN;tr|E9PK54|E9PK54_HUMAN;tr|E9PQK7|E9PQK7_HUMAN;sp|P54652|HSP72_HUMAN;sp|P11142|HSP7C_HUMAN;sp|P11142-2|HSP7C_HUMAN	4547719	3.21134e+06	10433800	2.25753e+06	6855461	18142702	0	FALSE
NTVVLFVPQQEAWVVER+0.000	sp|Q9UJZ1|STML2_HUMAN;sp|Q9UJZ1-2|STML2_HUMAN	4.9193e+06	2.15366e+06	9439700	808938	9155846	12745338	0	FALSE
AK+0.000EMDLVGLGLHPLFSSR+0.000	tr|H0YHH7|H0YHH7_HUMAN;sp|Q8TDD1|DDX54_HUMAN;sp|Q8TDD1-2|DDX54_HUMAN	1499611	756293	2.54889e+06	313641	3.64474e+06	8817535	0	FALSE
VLITTDLLAR+0.000	tr|E7EQG2|E7EQG2_HUMAN;sp|Q14240|IF4A2_HUMAN;sp|Q14240-2|IF4A2_HUMAN;sp|P60842|IF4A1_HUMAN	3.44866e+06	2.00967e+06	9427863	515744	5890249	14543760	0	FALSE
IC+57.021C+57.021QFDFK+0.000	tr|A0A0C4DGL1|A0A0C4DGL1_HUMAN;tr|H0YLB9|H0YLB9_HUMAN;tr|H0YNG5|H0YNG5_HUMAN;sp|Q16706|MA2A1_HUMAN;sp|P49641|MA2A2_HUMAN;sp|P49641-1|MA2A2_HUMAN;sp|P49641-2|MA2A2_HUMAN	1.16126e+06	743968	3.93493e+06	1.76724e+06	5829144	18136610	0	FALSE
SDGIYIINLK+0.000R+0.000	tr|F8WD59|F8WD59_HUMAN;tr|A0A0C4DG17|A0A0C4DG17_HUMAN;tr|C9J9K3|C9J9K3_HUMAN;sp|P08865|RSSA_HUMAN	3693633	1386043	6.89019e+06	437369	14291293	28388922	0	FALSE
LVQAAQM+15.995LQSDPYSVPAR+0.000DYLIDGSR+0.000	sp|P18206|VINC_HUMAN;sp|P18206-2|VINC_HUMAN;sp|P18206-3|VINC_HUMAN	5954570	2.5442e+06	10323219	0	6.48982e+06	21852264	0	FALSE
FHTITTSYYR+0.000	sp|P61026|RAB10_HUMAN	19004598	4061742	42764892	2854434	40711132	85760616	0	FALSE
LLADQAEAR+0.000R+0.000	tr|J3QR09|J3QR09_HUMAN;tr|J3KTE4|J3KTE4_HUMAN;sp|P84098|RL19_HUMAN	29105368	16491319	72914760	5021224	52012596	136942816	0	FALSE
QAPLAFQAGGR+0.000	sp|Q6UVK1|CSPG4_HUMAN	8125925	25858440	501654	24928422	46056828	0	0.000677179	FALSE
SDGIYIINLK+0.000R+0.000	tr|F8WD59|F8WD59_HUMAN;tr|A0A0C4DG17|A0A0C4DG17_HUMAN;tr|C9J9K3|C9J9K3_HUMAN;sp|P08865|RSSA_HUMAN	10546784	4592324	30487798	3.13717e+06	32697630	72352072	0	FALSE
VK+0.000DILQNVFK+0.000LEK+0.000	tr|F8WA66|F8WA66_HUMAN;tr|F5H3W0|F5H3W0_HUMAN;tr|F8WD97|F8WD97_HUMAN;tr|F5H4P4|F5H4P4_HUMAN;tr|F5H2L2|F5H2L2_HUMAN;sp|P46063|RECQ1_HUMAN	13617341	6.6251e+06	35228896	3.70447e+06	40530432	66102740	0	FALSE
VATQEGK+0.000EITC+57.021R+0.000	tr|B8ZZK2|B8ZZK2_HUMAN;tr|H7BZK5|H7BZK5_HUMAN;tr|M0QZK8|M0QZK8_HUMAN;sp|O75223|GGCT_HUMAN	6994858	6.23743e+06	42926256	2.85775e+06	39302544	56170212	0	FALSE
ISGLGLTPEQK+0.000	sp|O95831|AIFM1_HUMAN;sp|O95831-3|AIFM1_HUMAN;sp|O95831-4|AIFM1_HUMAN;sp|O95831-6|AIFM1_HUMAN	91965128	25796318	170585664	35879156	175176352	327818752	0	FALSE
GIFPVLC+57.021K+0.000DPVQEAWAEDVDLR+0.000	tr|B4DNK4|B4DNK4_HUMAN;tr|H3BR70|H3BR70_HUMAN;sp|P14618|KPYM_HUMAN;sp|P14618-2|KPYM_HUMAN;sp|P14618-3|KPYM_HUMAN	6.87651e+06	1.56056e+06	16133236	1.50263e+06	13369003	19758750	0	FALSE
TTGIVM+15.995DSGDGVTHTVPIYEGYALPHAILR+11.032	tr|I3L4N8|I3L4N8_HUMAN;tr|I3L1U9|I3L1U9_HUMAN;tr|I3L3I0|I3L3I0_HUMAN;tr|A0A2R8Y793|A0A2R8Y793_HUMAN;tr|A0A2R8YEA7|A0A2R8YEA7_HUMAN;sp|P63261|ACTG_HUMAN;sp|P60709|ACTB_HUMAN	1239217	1.01901e+06	419250	727546	1.21209e+06	2.55331e+06	0	FALSE
GDLGIEIPAEK+0.000VFLAQK+0.000	tr|B4DNK4|B4DNK4_HUMAN;tr|H3BR70|H3BR70_HUMAN;tr|H3BTN5|H3BTN5_HUMAN;sp|P14618|KPYM_HUMAN;sp|P14618-2|KPYM_HUMAN;sp|P14618-3|KPYM_HUMAN;sp|P30613|KPYR_HUMAN;sp|P30613-2|KPYR_HUMAN	15798266	5612221	33057526	5866368	32560720	164310336	0	FALSE
K+0.000PYIWEYSR+0.000	tr|V9GYZ6|V9GYZ6_HUMAN;sp|P07814|SYEP_HUMAN	26667106	14118952	94516840	7.95428e+06	95474160	129317520	0	FALSE
YGYTHLSTGDLLR+0.000	tr|Q5T9B7|Q5T9B7_HUMAN;sp|P00568|KAD1_HUMAN	36361032	7.42203e+06	60270480	1.65158e+06	45577960	92029816	0	FALSE
LFVTPPEGSSR+0.000	tr|A0A087WZ40|A0A087WZ40_HUMAN;sp|Q14244|MAP7_HUMAN;sp|Q14244-2|MAP7_HUMAN;sp|Q14244-3|MAP7_HUMAN;sp|Q14244-4|MAP7_HUMAN;sp|Q14244-5|MAP7_HUMAN;sp|Q14244-6|MAP7_HUMAN;sp|Q14244-7|MAP7_HUMAN	36460996	10336194	78041296	4.46095e+06	65955652	135452768	0	FALSE
SIQFVDWC+57.021PTGFK+0.000	sp|P68363|TBA1B_HUMAN;sp|P68363-2|TBA1B_HUMAN;sp|P68366|TBA4A_HUMAN;sp|P68366-2|TBA4A_HUMAN	7537230	24355270	0	63403536	7954594	0	0	FALSE
MK+0.000FNPFVTSDR+0.000	tr|J3QQV1|J3QQV1_HUMAN;tr|E5RHH1|E5RHH1_HUMAN;tr|E5RIT6|E5RIT6_HUMAN;tr|J3QRI7|J3QRI7_HUMAN;tr|J3KSS0|J3KSS0_HUMAN;tr|J3QQQ9|J3QQQ9_HUMAN;sp|P61254|RL26_HUMAN;sp|Q9UNX3|RL26L_HUMAN	107914416	42168144	248493744	31223108	221885264	432049664	0	FALSE
VLEHQLLQTTK+0.000	tr|G3XAJ4|G3XAJ4_HUMAN;tr|F8WCJ3|F8WCJ3_HUMAN;tr|F8WBV5|F8WBV5_HUMAN;tr|B8ZZX4|B8ZZX4_HUMAN;sp|O14530|TXND9_HUMAN;sp|O14530-2|TXND9_HUMAN	14997180	5483098	19384982	6982309	22012978	48144892	0	FALSE
AGPESDAQYQFTGIK+0.000K+0.000	sp|Q96IX5|USMG5_HUMAN	1.58066e+06	344099	4661219	1.87887e+06	15441267	26590938	0	FALSE
SAGNAVWLNR+0.000	tr|H0YHS6|H0YHS6_HUMAN;sp|Q9Y2Z4|SYYM_HUMAN	8123553	13439655	20978188	23989642	13867496	43606124	0	FALSE
MK+0.000PILLQGHER+0.000	tr|Q5TFK1|Q5TFK1_HUMAN;sp|Q13347|EIF3I_HUMAN	8632552	2.28335e+06	11476371	5.37311e+06	7989223	21622210	0	FALSE
VSQGQLVVM+15.995QPEK+0.000	sp|P13667|PDIA4_HUMAN	6737496	536162	9226144	1.24196e+06	8868668	26178926	0	FALSE
GM+15.995YGIENEVFLSLPC+57.021ILNAR+0.000	sp|P07195|LDHB_HUMAN	8927596	16154210	9351174	5.81273e+06	6615776	26507674	0	FALSE
QELVDAFVEHR+0.000	tr|I3L2B0|I3L2B0_HUMAN;tr|K7EIG1|K7EIG1_HUMAN;sp|O75153|CLU_HUMAN	18616206	9442524	10887504	10032166	2.05493e+06	12994081	0.000394536	FALSE
NFWVSGLSSTTR+0.000	sp|Q15424|SAFB1_HUMAN;sp|Q15424-2|SAFB1_HUMAN;sp|Q15424-3|SAFB1_HUMAN;sp|Q15424-4|SAFB1_HUMAN	31582870	6.78778e+06	65972184	88672160	64362888	140595104	0	FALSE
IYWSDLSQR+0.000	tr|J3KMZ9|J3KMZ9_HUMAN;tr|H0YMQ3|H0YMQ3_HUMAN;tr|H0YMD1|H0YMD1_HUMAN;tr|H0YM92|H0YM92_HUMAN;sp|P01130|LDLR_HUMAN;sp|P01130-2|LDLR_HUMAN;sp|P01130-3|LDLR_HUMAN;sp|P01130-4|LDLR_HUMAN;sp|P01130-5|LDLR_HUMAN;sp|P01130-6|LDLR_HUMAN	6211863	2.24311e+06	10636577	5767297	16533384	33131130	0	FALSE
ATTPVIMVGPGTGVAPFIGFIQER+0.000	tr|E7EMD0|E7EMD0_HUMAN;tr|H0Y4R2|H0Y4R2_HUMAN;sp|P16435|NCPR_HUMAN	7.79634e+06	2.20998e+06	12797488	4.14219e+06	10855205	26897974	0	FALSE
ALSIPPNIDVLLC+57.021EQEVVADETPAVQAVLR+0.000	tr|H0YGW7|H0YGW7_HUMAN;sp|Q8NE71|ABCF1_HUMAN;sp|Q8NE71-2|ABCF1_HUMAN	8687482	0	8.07051e+06	4416633	3.19743e+06	9439340	0	FALSE
MFLYADNEDR+0.000	tr|Q5TGM0|Q5TGM0_HUMAN;tr|A0A087WY55|A0A087WY55_HUMAN;sp|Q9NP79|VTA1_HUMAN;sp|Q9NP79-2|VTA1_HUMAN	1.6079e+06	210325	6608300	2.82449e+06	6.0073e+06	15694773	0	FALSE
DVDAAYMSK+0.000	sp|P08729|K2C7_HUMAN	21185664	5859608	43132108	2.32788e+06	39423944	102226992	0	FALSE
IDIQIK+0.000DAIGR+0.000	sp|P26639|SYTC_HUMAN;sp|P26639-2|SYTC_HUMAN	34235144	13869082	89321136	7.45483e+06	89942480	138511824	0	FALSE
AR+0.000DINAVLIDMER+0.000	tr|A0A3B3ITG9|A0A3B3ITG9_HUMAN;tr|H0YCK3|H0YCK3_HUMAN;tr|A0A3B3ISX1|A0A3B3ISX1_HUMAN;tr|A0A3B3IRQ9|A0A3B3IRQ9_HUMAN;sp|P55265|DSRAD_HUMAN;sp|P55265-2|DSRAD_HUMAN;sp|P55265-3|DSRAD_HUMAN;sp|P55265-4|DSRAD_HUMAN;sp|P55265-5|DSRAD_HUMAN	5768267	2.7312e+06	12004667	3.54001e+06	16685982	36207916	0	FALSE
YAHQSGFHVDR+0.000R+0.000	tr|Q5TCD1|Q5TCD1_HUMAN;tr|A0A0A0MSX9|A0A0A0MSX9_HUMAN;sp|P41252|SYIC_HUMAN	18169984	11295443	51975068	3.69349e+06	51145740	83403080	0	FALSE
VDGIAWSPETR+0.000	tr|F8VTY2|F8VTY2_HUMAN;sp|Q8NFH4|NUP37_HUMAN	17325292	1.21793e+06	30403698	2.71294e+06	39067248	64391452	0	FALSE
GIEK+0.000PPFELPDFIK+0.000R+0.000	tr|E9PPJ0|E9PPJ0_HUMAN;sp|Q13435|SF3B2_HUMAN	10511338	2.31595e+06	24810960	3279404	26658290	48598540	0	FALSE
SAFSGGYYR+0.000	tr|F2Z3A7|F2Z3A7_HUMAN;tr|A0A2R8Y817|A0A2R8Y817_HUMAN;sp|Q96DA6|TIM14_HUMAN;sp|Q96DA6-2|TIM14_HUMAN	7.75206e+06	1.72933e+06	15908701	1.25616e+06	17806288	35691712	0	FALSE
SAVEAER+0.000LVAGK+0.000	tr|B7Z4L4|B7Z4L4_HUMAN;sp|P04843|RPN1_HUMAN	12787816	6.90432e+06	10125990	2.17786e+06	15718864	31921858	0	FALSE
SVIDYQTHFR+0.000	tr|A0A0A6YYA0|A0A0A6YYA0_HUMAN;sp|Q86XR7-2|TCAM2_HUMAN;sp|Q9Y3B3|TMED7_HUMAN;sp|Q9Y3B3-2|TMED7_HUMAN	36678676	8966816	67050080	3469755	58360652	133147464	0	FALSE
IASQMITEGR+0.000	tr|D6RD63|D6RD63_HUMAN;tr|D6RAX7|D6RAX7_HUMAN;tr|D6RFN0|D6RFN0_HUMAN;sp|Q9BT78|CSN4_HUMAN	31162658	8714669	65507344	4603743	87716264	119509056	0	FALSE
LAVNMVPFPR+0.000	tr|Q5SQY0|Q5SQY0_HUMAN;tr|Q5ST81|Q5ST81_HUMAN;tr|Q5JP53|Q5JP53_HUMAN;tr|K7ESM5|K7ESM5_HUMAN;tr|A0A0B4J269|A0A0B4J269_HUMAN;tr|A0A075B736|A0A075B736_HUMAN;sp|Q9H4B7|TBB1_HUMAN;sp|Q9BUF5|TBB6_HUMAN;sp|P04350|TBB4A_HUMAN;sp|P07437|TBB5_HUMAN;sp|Q13885|TBB2A_HUMAN;sp|Q13509|TBB3_HUMAN;sp|Q13509-2|TBB3_HUMAN;sp|P68371|TBB4B_HUMAN;sp|Q3ZCM7|TBB8_HUMAN;sp|A6NNZ2|TBB8L_HUMAN;sp|Q9BVA1|TBB2B_HUMAN	20440318	722464	9132890	2.09028e+06	10500618	23364640	0	FALSE
VGEPVALSEEER+0.000LK+0.000	tr|E9PIL8|E9PIL8_HUMAN;tr|H0YCG1|H0YCG1_HUMAN;tr|E9PJT3|E9PJT3_HUMAN;tr|E9PPJ0|E9PPJ0_HUMAN;tr|E9PJ04|E9PJ04_HUMAN;sp|Q13435|SF3B2_HUMAN	36230188	12283840	74966000	9227255	66307728	147996192	0	FALSE
GAIQFVTQYQHSSGQR+0.000	tr|F5H365|F5H365_HUMAN;sp|Q15436|SC23A_HUMAN;sp|Q15436-2|SC23A_HUMAN	13167343	2.4066e+06	19629664	0	36980944	36670072	0.000106883	FALSE
TITYQAVPSEVPNEEPK+0.000	tr|F8WAE5|F8WAE5_HUMAN;tr|H7C5R5|H7C5R5_HUMAN;sp|Q9BY44|EIF2A_HUMAN;sp|Q9BY44-2|EIF2A_HUMAN;sp|Q9BY44-3|EIF2A_HUMAN;sp|Q9BY44-4|EIF2A_HUMAN	13141487	6504508	25623858	12530932	27063578	65704316	0	FALSE
TTAAHGLELR+0.000	sp|P08243|ASNS_HUMAN;sp|P08243-2|ASNS_HUMAN;sp|P08243-3|ASNS_HUMAN	14394040	4.78706e+06	31437008	309525	49860808	51525480	0	FALSE
NTC+57.021EAVVLGTLHPR+0.000	tr|M0R050|M0R050_HUMAN;sp|Q9NQT4|EXOS5_HUMAN	12978367	5.44051e+06	34633780	0	38565916	68136272	0	FALSE
AMGIM+15.995NSFVNDIFER+0.000	tr|U3KQK0|U3KQK0_HUMAN;sp|Q99877|H2B1N_HUMAN;sp|P23527|H2B1O_HUMAN;sp|P57053|H2BFS_HUMAN;sp|P62807|H2B1C_HUMAN;sp|P58876|H2B1D_HUMAN;sp|Q5QNW6|H2B2F_HUMAN;sp|Q5QNW6-2|H2B2F_HUMAN;sp|P06899|H2B1J_HUMAN;sp|O60814|H2B1K_HUMAN;sp|Q16778|H2B2E_HUMAN;sp|Q93079|H2B1H_HUMAN;sp|Q8N257|H2B3B_HUMAN;sp|P33778|H2B1B_HUMAN;sp|Q99880|H2B1L_HUMAN;sp|Q99879|H2B1M_HUMAN	11167176	3921502	10265999	2276281	2.66589e+06	14579367	0	FALSE
FLPR+0.000EEGPYEVEVTYDGVPVPGSPFPLEAVAPTK+0.000PSK+0.000	tr|Q60FE5|Q60FE5_HUMAN;tr|A0A087WWY3|A0A087WWY3_HUMAN;sp|P21333|FLNA_HUMAN;sp|P21333-2|FLNA_HUMAN	14984727	7.6433e+06	35780120	10600131	30918664	69232408	0	FALSE
LFPDTPLALDANK+0.000K+0.000K+0.000	sp|Q12906|ILF3_HUMAN;sp|Q12906-2|ILF3_HUMAN;sp|Q12906-3|ILF3_HUMAN;sp|Q12906-4|ILF3_HUMAN;sp|Q12906-5|ILF3_HUMAN;sp|Q12906-6|ILF3_HUMAN;sp|Q12906-7|ILF3_HUMAN	7.12967e+06	3335616	14867557	1571312	14646366	34922904	0	FALSE
STLTDSLVC+57.021K+0.000	sp|P13639|EF2_HUMAN	640452352	232337072	1307995008	97737736	1180779008	2507485952	0	FALSE
AAAGK+0.000AELELELGR+0.000	sp|Q15149|PLEC_HUMAN;sp|Q15149-2|PLEC_HUMAN;sp|Q15149-3|PLEC_HUMAN;sp|Q15149-4|PLEC_HUMAN;sp|Q15149-5|PLEC_HUMAN;sp|Q15149-6|PLEC_HUMAN;sp|Q15149-7|PLEC_HUMAN;sp|Q15149-8|PLEC_HUMAN;sp|Q15149-9|PLEC_HUMAN	11359129	17074326	31918512	5.64103e+06	38209936	99652520	0	FALSE
GSALAALHC+57.021GR+0.000PPESPVNYGSPPSIADTLFSR+0.000	sp|Q8WWQ0|PHIP_HUMAN	12836152	8471199	23430640	2102843	20611674	29998788	0.00025997	FALSE
EVPAVPETLK+0.000K+0.000	sp|P18124|RL7_HUMAN	67999304	28921978	126882960	9750116	114005000	173937680	0	FALSE
R+0.000GQIC+57.021WYQK+0.000PGVGLDAINDANLLEAC+57.021IYR+0.000	tr|A0A087WVN4|A0A087WVN4_HUMAN;tr|A0A087X090|A0A087X090_HUMAN;sp|P14324|FPPS_HUMAN;sp|P14324-2|FPPS_HUMAN	16977434	6.36285e+06	36975796	2.77474e+06	28994842	37150164	0	FALSE
M+15.995K+0.000EIAEAYLGK+0.000	tr|E9PKE3|E9PKE3_HUMAN;tr|E9PQQ4|E9PQQ4_HUMAN;tr|E9PI65|E9PI65_HUMAN;tr|E9PLF4|E9PLF4_HUMAN;tr|E9PN89|E9PN89_HUMAN;tr|E9PPY6|E9PPY6_HUMAN;tr|E9PK54|E9PK54_HUMAN;tr|E9PQK7|E9PQK7_HUMAN;sp|P11142|HSP7C_HUMAN;sp|P11142-2|HSP7C_HUMAN	22367696	9149637	52564692	6.85613e+06	51972788	114495664	0	FALSE
YIPNR+0.000GPLDK+0.000WR+0.000	sp|P27635|RL10_HUMAN	4.6409e+06	3.42377e+06	18280802	0	15981082	26501600	0	FALSE
ISTQLDFASK+0.000	sp|P12270|TPR_HUMAN;sp|P12270-2|TPR_HUMAN	13052100	2.91884e+06	26315094	0	45570536	54877204	0	FALSE
SLIGVEYK+0.000PVSATGAEDK+0.000DK+0.000	sp|P07814|SYEP_HUMAN	26825246	18721466	30471988	3298147	33950796	48423516	0	FALSE
NVELTEVGPR+0.000	tr|B9A008|B9A008_HUMAN;tr|H0Y714|H0Y714_HUMAN;tr|E7ENR5|E7ENR5_HUMAN;sp|Q96G21|IMP4_HUMAN	14904846	3.72804e+06	22815216	1.6948e+06	28505886	42746388	0	FALSE
NLDLSWSELK+0.000K+0.000	tr|G3V198|G3V198_HUMAN;tr|E9PR16|E9PR16_HUMAN;sp|Q12769|NU160_HUMAN;sp|Q12769-3|NU160_HUMAN	8471426	3141888	19975878	1.42058e+06	26142500	51340612	0	FALSE
TNEK+0.000VELQELNDR+0.000FANYIDK+0.000VR+0.000	tr|B0YJC4|B0YJC4_HUMAN;tr|A0A1B0GTT5|A0A1B0GTT5_HUMAN;sp|P08670|VIME_HUMAN	29055300	23721096	24676174	0	35583660	62526716	0	FALSE
TDLLLEPYNK+0.000YR+0.000	sp|P35579|MYH9_HUMAN;sp|P35579-2|MYH9_HUMAN	6831249	11043943	10781275	19073394	19927040	22544936	0	FALSE
FC+57.021DNSSAIQGK+0.000	sp|O15067|PUR4_HUMAN	17289996	4231205	39450968	3.04202e+06	37371148	76116696	0	FALSE
M+15.995LSLDFLDDVR+0.000R+0.000	tr|H0YNG3|H0YNG3_HUMAN;tr|H0YKT4|H0YKT4_HUMAN;sp|P67812|SC11A_HUMAN;sp|P67812-3|SC11A_HUMAN;sp|P67812-4|SC11A_HUMAN	3.4264e+06	826630	11331232	0	7.19385e+06	17357324	0	FALSE
EAELSK+0.000GESVC+57.021LDR+0.000	sp|P62072|TIM10_HUMAN	6.53849e+06	2.07472e+06	13596308	2.028e+06	15188309	28256686	0	FALSE
FLQEEAEK+0.000MK+0.000	sp|Q15149|PLEC_HUMAN;sp|Q15149-2|PLEC_HUMAN;sp|Q15149-3|PLEC_HUMAN;sp|Q15149-4|PLEC_HUMAN;sp|Q15149-5|PLEC_HUMAN;sp|Q15149-6|PLEC_HUMAN;sp|Q15149-7|PLEC_HUMAN;sp|Q15149-8|PLEC_HUMAN;sp|Q15149-9|PLEC_HUMAN	13604156	13180589	15104182	586393	13136154	29960644	0	FALSE
VR+0.000EEVPLELVEAHVK+0.000	sp|Q92922|SMRC1_HUMAN	6236300	2903025	10193652	7.52448e+06	19016770	39373548	0	FALSE
LQAEAFQAR+0.000	sp|P02649|APOE_HUMAN	564845376	0	8074931	8572406	0	1.42301e+06	0.00222193	FALSE
K+0.000HSQFIGYPITLFVEK+0.000	tr|G3V2J8|G3V2J8_HUMAN;sp|P07900|HS90A_HUMAN;sp|P07900-2|HS90A_HUMAN;sp|Q58FG0|HS905_HUMAN	833317	411997	1.56194e+06	373262	1.06578e+06	1.19366e+06	0.00276656	FALSE
SGPFGQIFR+0.000PDNFVFGQSGAGNNWAK+0.000	tr|Q5ST81|Q5ST81_HUMAN;tr|Q5JP53|Q5JP53_HUMAN;tr|M0R1I1|M0R1I1_HUMAN;tr|M0QZL7|M0QZL7_HUMAN;tr|M0R278|M0R278_HUMAN;tr|M0QY85|M0QY85_HUMAN;sp|P04350|TBB4A_HUMAN;sp|P07437|TBB5_HUMAN;sp|Q13885|TBB2A_HUMAN;sp|P68371|TBB4B_HUMAN;sp|Q9BVA1|TBB2B_HUMAN	9594258	7.71507e+06	22947608	4.45373e+06	22632602	54969140	0	FALSE
INPYMSSPC+57.021HIEMILTEK+0.000EQIVPK+0.000PEEEVAQK+0.000	tr|J3QQT2|J3QQT2_HUMAN;tr|A0A087WXM6|A0A087WXM6_HUMAN;tr|A0A0A0MRF8|A0A0A0MRF8_HUMAN;tr|A0A0A6YYL6|A0A0A6YYL6_HUMAN;tr|J3QLC8|J3QLC8_HUMAN;tr|J3KRX5|J3KRX5_HUMAN;sp|P18621|RL17_HUMAN;sp|P18621-2|RL17_HUMAN;sp|P18621-3|RL17_HUMAN	49493188	28361468	108898688	24157962	95774632	164922160	0	FALSE
LAALNPESNTAGLDIFAK+0.000	sp|O00299|CLIC1_HUMAN	8724762	1.98862e+06	16921578	5552095	16960130	32064738	0	FALSE
K+0.000AC+57.021GDSTLTQITAGLDPVGR+0.000	tr|C9JIS1|C9JIS1_HUMAN;tr|C9JZN1|C9JZN1_HUMAN;tr|C9JXA5|C9JXA5_HUMAN;sp|P62879|GBB2_HUMAN	31291546	14771827	80883656	5.7491e+06	84540784	151625056	0	FALSE
NVLIFDLGGGTFDVSILTIEDGIFEVK+0.000	tr|E9PKE3|E9PKE3_HUMAN;tr|E9PN89|E9PN89_HUMAN;sp|P54652|HSP72_HUMAN;sp|P11142|HSP7C_HUMAN;sp|P11142-2|HSP7C_HUMAN	43371688	0	6602512	0	967212	2.44931e+06	0.00276656	FALSE
VIHDNFGIVEGLMTTVHAITATQK+0.000	tr|E7EUT5|E7EUT5_HUMAN;sp|P04406|G3P_HUMAN;sp|P04406-2|G3P_HUMAN	44513540	26803008	138470480	9298156	124483400	234908352	0	FALSE
NLHQSGFSLSGAQIDDNIPR+0.000	tr|A0A1C7CYX9|A0A1C7CYX9_HUMAN;sp|Q16555|DPYL2_HUMAN;sp|Q16555-2|DPYL2_HUMAN	14906988	9025837	35818332	8397208	21183256	88138024	0	FALSE
GVTEAIQNFSFR+0.000	tr|E3W994|E3W994_HUMAN;tr|J3KR49|J3KR49_HUMAN;tr|E7EW49|E7EW49_HUMAN;tr|E7ERI8|E7ERI8_HUMAN;tr|A0A0U1RQI6|A0A0U1RQI6_HUMAN;sp|O75122|CLAP2_HUMAN;sp|O75122-3|CLAP2_HUMAN	5.6301e+06	1.72151e+06	10069764	3841110	9881019	16330261	0	FALSE
AWDDFFPGSDR+0.000	tr|C9JQU6|C9JQU6_HUMAN;tr|F8WF90|F8WF90_HUMAN;tr|F8WF33|F8WF33_HUMAN;sp|O75915|PRAF3_HUMAN	9050125	2.36504e+06	15445589	494790	14216488	31411284	0	FALSE
APK+0.000PDGPGGGPGGSHMGGNYGDDR+0.000	tr|H3BPE7|H3BPE7_HUMAN;sp|P35637|FUS_HUMAN;sp|P35637-2|FUS_HUMAN	17514780	7986344	31933658	4.77522e+06	28990152	75762568	0	FALSE
MQASIEK+0.000GGSLPK+0.000VEAK+0.000	sp|P06748|NPM_HUMAN;sp|P06748-2|NPM_HUMAN	22024218	6608695	56918196	3096997	50295324	99886400	0	FALSE
PSK+0.000GPLQSVQVFGR+0.000	tr|M0R3H0|M0R3H0_HUMAN;tr|Q6IPX4|Q6IPX4_HUMAN;tr|M0R210|M0R210_HUMAN;sp|P62249|RS16_HUMAN	75073968	55691900	55780760	35419128	75980392	63344688	0.00148208	FALSE
GK+0.000LPIVNDC+57.021DELVAIIAR+0.000	tr|C9J381|C9J381_HUMAN;tr|A0A3B3IRL5|A0A3B3IRL5_HUMAN;tr|C9K0R9|C9K0R9_HUMAN;sp|P20839|IMDH1_HUMAN;sp|P20839-2|IMDH1_HUMAN;sp|P20839-3|IMDH1_HUMAN;sp|P20839-4|IMDH1_HUMAN;sp|P20839-5|IMDH1_HUMAN;sp|P20839-6|IMDH1_HUMAN;sp|P20839-7|IMDH1_HUMAN	7331808	4925270	7458863	1.74525e+06	7982913	19633882	0	FALSE
LNLNNTVLSK+0.000	tr|V9GYZ6|V9GYZ6_HUMAN;sp|P07814|SYEP_HUMAN	20355562	7.52371e+06	23945214	3348009	25699038	43530068	0	FALSE
IIPTLEEGLQLPSPTATSQLPLESDAVEC+57.021LNYQHYK+0.000	sp|P61978|HNRPK_HUMAN;sp|P61978-2|HNRPK_HUMAN	74277000	57799864	153756784	137541888	207829792	401204544	0.000106883	FALSE
K+0.000VLQSPATTVVR+0.000	sp|Q8TCS8|PNPT1_HUMAN	4990640	1.64584e+06	11780126	7.15062e+06	15993700	30163728	0	FALSE
MMIPDC+57.021QR+0.000	tr|E5RIW3|E5RIW3_HUMAN;tr|E5RHG6|E5RHG6_HUMAN;tr|E5RJD8|E5RJD8_HUMAN;sp|O75347|TBCA_HUMAN;sp|O75347-2|TBCA_HUMAN	6330105	2.23654e+06	19686738	738007	20116116	29082684	0	FALSE
FSIYPPIPGEESSLR+0.000	tr|H0YL99|H0YL99_HUMAN;sp|P82912|RT11_HUMAN;sp|P82912-2|RT11_HUMAN	12859893	3.94186e+06	20832794	2519199	23099288	44153432	0	FALSE
NFILDQC+57.021NVYNSGQR+11.032	tr|H3BQZ7|H3BQZ7_HUMAN;sp|Q1KMD3|HNRL2_HUMAN	4.43796e+06	3.34806e+06	12947516	0	12508048	23003290	0	FALSE
LMK+0.000ELEEIR+0.000K+0.000	sp|P68036|UB2L3_HUMAN;sp|A0A1B0GUS4|UB2L5_HUMAN	7963063	2.80627e+06	17777816	1.0546e+06	18266826	33855748	0	FALSE
FSQMLQDK+0.000PLR+0.000	sp|Q9H6F5|CCD86_HUMAN	2.94565e+06	486909	13904753	1.12261e+06	17499048	36982184	0	FALSE
DIK+0.000PENLLLGLK+0.000GELK+0.000	tr|J3KTD6|J3KTD6_HUMAN;tr|J3KT86|J3KT86_HUMAN;tr|J3QLN8|J3QLN8_HUMAN;sp|Q96GD4|AURKB_HUMAN;sp|Q96GD4-2|AURKB_HUMAN;sp|Q96GD4-4|AURKB_HUMAN;sp|Q96GD4-5|AURKB_HUMAN	1.35785e+06	877134	1.04046e+06	674882	4.53446e+06	9860223	0	FALSE
GGK+0.000IGLFGGAGVGK+0.000	tr|F8W079|F8W079_HUMAN;tr|H0YH81|H0YH81_HUMAN;sp|P06576|ATPB_HUMAN	1502684	334013	4.8022e+06	965016	9074500	17761866	0	FALSE
VAYVSFGPHAGK+0.000	tr|E7EPB3|E7EPB3_HUMAN;sp|P50914|RL14_HUMAN	366204992	116330808	785026048	138792656	707462912	1246226816	0	FALSE
LC+57.021SGVLGTVVHGK+0.000	tr|E9PIE4|E9PIE4_HUMAN;sp|Q9Y6C9|MTCH2_HUMAN	11516654	4212268	32003982	1515088	35331228	62835968	0	FALSE
TALTYYLDITNPPR+0.000	tr|E7EMD0|E7EMD0_HUMAN;tr|H0Y4R2|H0Y4R2_HUMAN;sp|P16435|NCPR_HUMAN	57120768	29633088	36131536	45134956	0	26803718	0.000394536	FALSE
C+57.021ESAFLSK+0.000	tr|C9JNW5|C9JNW5_HUMAN;tr|C9JXB8|C9JXB8_HUMAN;sp|P83731|RL24_HUMAN	12307181	2955781	28697718	1179535	35650532	41855412	0	FALSE
SQAASILTK+0.000	sp|O95347|SMC2_HUMAN;sp|O95347-2|SMC2_HUMAN	15654714	3.22875e+06	34041908	3.80577e+06	45779860	85375504	0	FALSE
TLYVEEVVPNVIEPSFGLGR+0.000	sp|P41250|GARS_HUMAN	9621165	0	40343636	842591	23096014	73616152	0	FALSE
FLDAGHK+0.000LNFAVASR+0.000	sp|P30101|PDIA3_HUMAN	12874310	16086644	42270744	11681964	41889452	76000776	0	FALSE
SEVATLTAAGK+0.000	sp|P36542|ATPG_HUMAN;sp|P36542-2|ATPG_HUMAN	49611596	12006004	80409024	4.70985e+06	86491928	198780752	0	FALSE
K+0.000IEK+0.000EIQQK+0.000	tr|A0A087WXY1|A0A087WXY1_HUMAN;sp|Q9P2J5|SYLC_HUMAN	4.70777e+06	3.62994e+06	10320004	2.74097e+06	11791745	17632890	0	FALSE
FLLLGLR+0.000PFIPEK+0.000	tr|A0A0A0MT72|A0A0A0MT72_HUMAN;tr|C9JUH3|C9JUH3_HUMAN;sp|Q9BSQ5|CCM2_HUMAN;sp|Q9BSQ5-2|CCM2_HUMAN;sp|Q9BSQ5-3|CCM2_HUMAN;sp|Q9BSQ5-4|CCM2_HUMAN	0	1.07032e+06	35486068	0	456811	0	0.00381762	FALSE
VFIM+15.995DNC+57.021EELIPEYLNFIR+0.000	sp|P07900|HS90A_HUMAN;sp|P07900-2|HS90A_HUMAN	71273592	16443957	174067232	12142335	147628656	225287824	0.000209315	FALSE
ISGLIYEETR+0.000GVLK+0.000	sp|P62805|H4_HUMAN	8.08926e+06	3946718	10323521	3999376	7.399e+06	15886324	0	FALSE
NTIEETGNLAEQAR+0.000	sp|P11047|LAMC1_HUMAN	11011992	7983674	21603614	7549883	29376770	58102120	0	FALSE
LSK+0.000DPNIVIAK+0.000	sp|P30101|PDIA3_HUMAN	0	29486628	318111648	36115320	358252672	600475520	0	FALSE
K+0.000VEAIMHAFENLEK+0.000R+0.000K+0.000	tr|H0Y3R4|H0Y3R4_HUMAN;tr|E7EWN3|E7EWN3_HUMAN;sp|Q9C0A6|SETD5_HUMAN;sp|Q9C0A6-2|SETD5_HUMAN;sp|Q9C0A6-3|SETD5_HUMAN	57432860	945080	2.68119e+06	1.1433e+06	3702430	5.26047	0.00344422	FALSE
LQEEMLQR+0.000	tr|B0YJC4|B0YJC4_HUMAN;tr|B0YJC5|B0YJC5_HUMAN;sp|P08670|VIME_HUMAN	48305988	13755716	102179312	3357576	68644960	139911600	0	FALSE
K+0.000FDLNSPWEAFPVYR+0.000	sp|O75489|NDUS3_HUMAN	1.48688e+06	1.45803e+06	2.13515e+06	1994765	3.65321e+06	1.37188e+06	0.00518779	FALSE
YIYDQC+57.021PAVAGYGPIEQLPDYNR+0.000	sp|P31930|QCR1_HUMAN	87849056	20731856	169832816	35324412	184314352	275697408	0	FALSE
SIAVLELIC+57.021DVHNPGQDLVIHR+0.000	tr|F2Z356|F2Z356_HUMAN;sp|Q9UKN8|TF3C4_HUMAN	5.90967e+06	4.10222e+06	12343331	2.22357e+06	15111540	25777814	0	FALSE
VGEVIVTK+0.000DDAM+15.995LLK+0.000	sp|P10809|CH60_HUMAN	47002748	17446194	94463128	12292071	114172920	260105776	0	FALSE
FVETPGQK+0.000	tr|E7ERC4|E7ERC4_HUMAN;sp|P05455|LA_HUMAN	69711584	17149804	125832320	19561258	221548064	253462752	0	FALSE
SLFEASQQLLNEMK+0.000	tr|J3KTL8|J3KTL8_HUMAN;sp|A6NHR9|SMHD1_HUMAN;sp|A6NHR9-2|SMHD1_HUMAN;sp|A6NHR9-3|SMHD1_HUMAN	11453835	3136849	7.73261e+06	7837845	7.86864e+06	16847148	0.000106883	FALSE
LR+0.000HEILLSQSVR+0.000	sp|P54886|P5CS_HUMAN;sp|P54886-2|P5CS_HUMAN	1.68296e+06	1.15646e+06	8272798	0	11112856	25796534	0	FALSE
LNFSHGTHEYHAETIK+0.000	tr|H3BQ34|H3BQ34_HUMAN;tr|H3BTJ2|H3BTJ2_HUMAN;tr|H3BT25|H3BT25_HUMAN;tr|H3BTN5|H3BTN5_HUMAN;tr|H3BUW1|H3BUW1_HUMAN;sp|P14618|KPYM_HUMAN;sp|P14618-2|KPYM_HUMAN	32127054	10399322	77306144	10196801	71991288	160514928	0	FALSE
EYQELMSVK+0.000	sp|P19013|K2C4_HUMAN;sp|P08729|K2C7_HUMAN	31607838	12228561	42378740	4544734	43073704	99908696	0	FALSE
LSK+0.000DPNIVIAK+0.000	sp|P30101|PDIA3_HUMAN	40927172	6991320	85379344	7.94733e+06	90758064	170639904	0	FALSE
EK+0.000YIDQEELNK+0.000	sp|P07900|HS90A_HUMAN;sp|P07900-2|HS90A_HUMAN;sp|Q14568|HS902_HUMAN;sp|P08238|HS90B_HUMAN;sp|Q58FF8|H90B2_HUMAN	61431192	24053952	141768960	14255349	101933792	237906608	0	FALSE
LK+0.000ETAESVLK+0.000	tr|A0A087WYC1|A0A087WYC1_HUMAN;tr|A0A087WTS8|A0A087WTS8_HUMAN;sp|P34932|HSP74_HUMAN	13412105	7743127	29593490	2.64019e+06	23152784	43115980	0	FALSE
FINVPPQIALPMYQQLQK+0.000	sp|Q9P287|BCCIP_HUMAN;sp|Q9P287-2|BCCIP_HUMAN;sp|Q9P287-3|BCCIP_HUMAN;sp|Q9P287-4|BCCIP_HUMAN	9033586	1.50155e+06	22405604	7.70817e+06	15463893	53358040	0	FALSE
MGGDIANR+0.000	tr|F8VR77|F8VR77_HUMAN;sp|Q9UQ80|PA2G4_HUMAN	103005024	34520396	215347376	15680793	172850448	358435872	0	FALSE
TNEK+0.000VELQELNDR+0.000FANYIDK+0.000VR+0.000	tr|B0YJC4|B0YJC4_HUMAN;tr|A0A1B0GTT5|A0A1B0GTT5_HUMAN;sp|P08670|VIME_HUMAN	95061912	35928972	207852416	34844304	241570464	369056608	0	FALSE
SK+0.000VEDPEINSIQDIK+0.000EGQLLR+0.000	tr|A0A3B3IUD7|A0A3B3IUD7_HUMAN;sp|Q14690|RRP5_HUMAN	6542999	1.70271e+06	13415851	1380692	30204192	53685608	0	FALSE
VFLENVIR+0.000DAVTYTEHAK+0.000R+0.000	sp|P62805|H4_HUMAN	56407732	22863020	127902792	14386465	144357584	214565040	0	FALSE
VVTR+0.000HPDLK+0.000TDGFGIDTC+57.021R+0.000	tr|A0A0C4DGQ5|A0A0C4DGQ5_HUMAN;tr|K7EM73|K7EM73_HUMAN;tr|U3KQE2|U3KQE2_HUMAN;tr|U3KPR7|U3KPR7_HUMAN;tr|K7EIV0|K7EIV0_HUMAN;tr|K7EKD8|K7EKD8_HUMAN;tr|A0A075B7C0|A0A075B7C0_HUMAN;tr|K7ELJ7|K7ELJ7_HUMAN;sp|P04632|CPNS1_HUMAN	23253206	19159518	64444396	11362406	60136840	127159632	0	FALSE
TIVTTLQDSIR+0.000K+0.000	sp|P07996|TSP1_HUMAN;sp|P07996-2|TSP1_HUMAN	45183368	621270	11422637	1.15886e+06	4828511	6.7129e+06	0.00556078	FALSE
K+0.000LPPLPSLTSQPHQVLASEPIPFSDLQQVSR+0.000	sp|Q6IAA8|LTOR1_HUMAN	23071682	11537810	43170516	0	38450676	84497472	0	FALSE
TDGALLVNAMFFK+0.000PHWDEK+0.000	tr|E9PK86|E9PK86_HUMAN;tr|E9PMI5|E9PMI5_HUMAN;tr|E9PR70|E9PR70_HUMAN;tr|E9PPV6|E9PPV6_HUMAN;sp|P50454|SERPH_HUMAN	2249904	1.14402e+06	5559089	1.23132e+06	7.33184e+06	15686141	0	FALSE
ITK+0.000PGSIDSNNQLFAPGGR+0.000	tr|E9PGM1|E9PGM1_HUMAN;tr|E7EX73|E7EX73_HUMAN;tr|E7EUU4|E7EUU4_HUMAN;sp|Q04637|IF4G1_HUMAN;sp|Q04637-3|IF4G1_HUMAN;sp|Q04637-4|IF4G1_HUMAN;sp|Q04637-5|IF4G1_HUMAN;sp|Q04637-6|IF4G1_HUMAN;sp|Q04637-7|IF4G1_HUMAN;sp|Q04637-8|IF4G1_HUMAN;sp|Q04637-9|IF4G1_HUMAN	83529560	34425760	167104080	9034743	172753424	387270880	0	FALSE
GFGFVLFK+0.000	tr|A0A087WUK2|A0A087WUK2_HUMAN;tr|H0Y8G5|H0Y8G5_HUMAN;tr|D6RAF8|D6RAF8_HUMAN;tr|D6RBQ9|D6RBQ9_HUMAN;tr|D6RF44|D6RF44_HUMAN;tr|H0YA96|H0YA96_HUMAN;sp|Q14103|HNRPD_HUMAN;sp|Q14103-2|HNRPD_HUMAN;sp|Q14103-3|HNRPD_HUMAN;sp|Q14103-4|HNRPD_HUMAN;sp|O14979|HNRDL_HUMAN;sp|O14979-2|HNRDL_HUMAN;sp|O14979-3|HNRDL_HUMAN	796672	1.08736e+06	1.51506e+06	418363	1.34748e+06	3.44318e+06	0	FALSE
LLQDSVDFSLADAINTEFK+0.000	tr|B0YJC4|B0YJC4_HUMAN;tr|A0A1B0GVG8|A0A1B0GVG8_HUMAN;tr|A0A1B0GTT5|A0A1B0GTT5_HUMAN;sp|P08670|VIME_HUMAN	21834730	6757281	18756670	8507715	20427872	8241576	0	FALSE
LQAEIDNIK+0.000	tr|A0A1W2PRP1|A0A1W2PRP1_HUMAN;sp|P08729|K2C7_HUMAN	15821101	4100116	36389280	3.86489e+06	31570930	74622576	0	FALSE
R+0.000LEAAYLDLQR+0.000	tr|E5RIW3|E5RIW3_HUMAN;tr|E5RHG6|E5RHG6_HUMAN;tr|E5RJD8|E5RJD8_HUMAN;sp|O75347|TBCA_HUMAN;sp|O75347-2|TBCA_HUMAN	150766384	104641400	298015680	44156756	367614240	454043424	0	FALSE
VAPAQPSEEGPGR+0.000K+0.000DENK+0.000VDGMNAPK+0.000	tr|E7EX17|E7EX17_HUMAN;sp|P23588|IF4B_HUMAN;sp|P23588-2|IF4B_HUMAN	30149642	14344944	67348696	3.41028e+06	49098148	102480712	0.000106883	FALSE
GLTDLSAC+57.021K+0.000	tr|Q5JXT2|Q5JXT2_HUMAN;sp|O00567|NOP56_HUMAN	18830454	4.905e+06	44573984	3.35774e+06	48458264	71084200	0	FALSE
VK+0.000YETELAMR+0.000	tr|F8VZY9|F8VZY9_HUMAN;sp|P05783|K1C18_HUMAN	188847440	89620816	442109664	27109594	321412480	797529920	0	FALSE
SGPFGQIFR+0.000PDNFVFGQSGAGNNWAK+0.000	tr|Q5ST81|Q5ST81_HUMAN;tr|Q5JP53|Q5JP53_HUMAN;tr|M0R1I1|M0R1I1_HUMAN;tr|M0QZL7|M0QZL7_HUMAN;tr|M0R278|M0R278_HUMAN;tr|M0QY85|M0QY85_HUMAN;sp|P04350|TBB4A_HUMAN;sp|P07437|TBB5_HUMAN;sp|Q13885|TBB2A_HUMAN;sp|P68371|TBB4B_HUMAN;sp|Q9BVA1|TBB2B_HUMAN	666343616	473628448	1526738560	131126048	1522191744	3163597312	0	FALSE
DLVVLLFETALLSSGFSLEDPQTHSNR+0.000	sp|P08238|HS90B_HUMAN	3.52079e+06	4295769	1.29067e+06	1.16904e+06	1.0768e+06	508789	0.00369646	FALSE
GDVTAQIALQPALK+0.000	tr|F5H3C5|F5H3C5_HUMAN;tr|F5GYZ5|F5GYZ5_HUMAN;tr|F5H4R2|F5H4R2_HUMAN;sp|P04179|SODM_HUMAN;sp|P04179-3|SODM_HUMAN;sp|P04179-4|SODM_HUMAN	9885607	5932010	33218984	7014825	33651640	82729160	0	FALSE
GQGVYLGM+15.995PGC+57.021LPVYDALAGEFIR+0.000	tr|F8VY02|F8VY02_HUMAN;sp|P30040|ERP29_HUMAN	19160602	2.05418e+06	17276976	4758034	19983604	25684550	0	FALSE
EEGTPLTLYYSHWR+0.000	sp|Q9Y3T9|NOC2L_HUMAN	16850910	5.52129e+06	33329052	1.36868e+06	37050984	64986180	0	FALSE
IVEM+15.995STSK+0.000	tr|I3L397|I3L397_HUMAN;tr|C9J4W5|C9J4W5_HUMAN;tr|F8WCJ1|F8WCJ1_HUMAN;tr|C9J7B5|C9J7B5_HUMAN;tr|I3L504|I3L504_HUMAN;sp|P63241|IF5A1_HUMAN;sp|P63241-2|IF5A1_HUMAN;sp|Q9GZV4|IF5A2_HUMAN	25069820	7.17229e+06	52701164	1.60362e+06	33483018	52770728	0	FALSE
IVVVTAGVR+0.000	tr|A0A3B3IS95|A0A3B3IS95_HUMAN;tr|A8MW50|A8MW50_HUMAN;tr|F5H793|F5H793_HUMAN;tr|C9J7H8|C9J7H8_HUMAN;sp|P07195|LDHB_HUMAN	11303801	4.55159e+06	14703785	3.28437e+06	17369622	30291414	0	FALSE
ILLAELEQLK+0.000GQGK+0.000	tr|B0YJC4|B0YJC4_HUMAN;tr|A0A1B0GTT5|A0A1B0GTT5_HUMAN;sp|P08670|VIME_HUMAN	137801328	50556156	298456544	28681606	301165824	538829312	0	FALSE
DLK+0.000DYFTK+0.000	tr|D6R9P3|D6R9P3_HUMAN;tr|D6RBZ0|D6RBZ0_HUMAN;tr|D6RD18|D6RD18_HUMAN;sp|Q99729|ROAA_HUMAN;sp|Q99729-2|ROAA_HUMAN;sp|Q99729-3|ROAA_HUMAN;sp|Q99729-4|ROAA_HUMAN	24010202	10859170	76766168	2.96018e+06	54812912	132829528	0	FALSE
ALPSEELNR+0.000	tr|H7C0V6|H7C0V6_HUMAN;tr|E9PGM1|E9PGM1_HUMAN;tr|E7EX73|E7EX73_HUMAN;tr|E7EUU4|E7EUU4_HUMAN;sp|Q04637|IF4G1_HUMAN;sp|Q04637-3|IF4G1_HUMAN;sp|Q04637-4|IF4G1_HUMAN;sp|Q04637-5|IF4G1_HUMAN;sp|Q04637-6|IF4G1_HUMAN;sp|Q04637-7|IF4G1_HUMAN;sp|Q04637-8|IF4G1_HUMAN;sp|Q04637-9|IF4G1_HUMAN	79403144	22577980	141983328	20111306	129746784	280050752	0	FALSE
SGPFGQIFR+0.000PDNFVFGQSGAGNNWAK+0.000	tr|Q5ST81|Q5ST81_HUMAN;tr|Q5JP53|Q5JP53_HUMAN;tr|M0R1I1|M0R1I1_HUMAN;tr|M0QZL7|M0QZL7_HUMAN;tr|M0R278|M0R278_HUMAN;tr|M0QY85|M0QY85_HUMAN;sp|P04350|TBB4A_HUMAN;sp|P07437|TBB5_HUMAN;sp|Q13885|TBB2A_HUMAN;sp|P68371|TBB4B_HUMAN;sp|Q9BVA1|TBB2B_HUMAN	24161944	20165538	55791604	13737966	60163864	125729592	0	FALSE
SAQFFNYK+0.000	tr|Q5JXB7|Q5JXB7_HUMAN;tr|Q5JXB8|Q5JXB8_HUMAN;sp|Q02809|PLOD1_HUMAN;sp|Q02809-2|PLOD1_HUMAN	11092044	3.14088e+06	25843352	2.09841e+06	32990880	70034000	0	FALSE
GLLSSLDHTSIR+0.000R+0.000	sp|P08574|CY1_HUMAN	10703714	6.63334e+06	25178144	3933266	22654786	61887644	0	FALSE
K+0.000GSFSALVGR+0.000	tr|A0A087WWN2|A0A087WWN2_HUMAN;sp|Q13619|CUL4A_HUMAN	9956584	5.11649e+06	23159508	2.16402e+06	17598628	46594572	0	FALSE
DDGVFVQEVTQNSPAAR+0.000	tr|E9PJZ0|E9PJZ0_HUMAN;tr|E9PJC6|E9PJC6_HUMAN;tr|E9PKR9|E9PKR9_HUMAN;tr|E9PQE3|E9PQE3_HUMAN;tr|E9PLK4|E9PLK4_HUMAN;sp|Q09666|AHNK_HUMAN;sp|Q09666-2|AHNK_HUMAN	8595258	4.81652e+06	15708963	2.83563e+06	17734238	31619130	0	FALSE
GASQAGMTGYGM+15.995PR+0.000	tr|C9J5W6|C9J5W6_HUMAN;sp|P37802|TAGL2_HUMAN;sp|P37802-2|TAGL2_HUMAN;sp|Q9UI15|TAGL3_HUMAN	26279586	8.37163e+06	48520864	3.67847e+06	54787088	112277688	0	FALSE
HQGVM+15.995VGM+15.995GQK+0.000	tr|G5E9R0|G5E9R0_HUMAN;tr|C9JZR7|C9JZR7_HUMAN;tr|A0A2R8YGF8|A0A2R8YGF8_HUMAN;tr|C9JUM1|C9JUM1_HUMAN;tr|K7EM38|K7EM38_HUMAN;tr|F8WB63|F8WB63_HUMAN;tr|I3L3R2|I3L3R2_HUMAN;tr|I3L1U9|I3L1U9_HUMAN;tr|I3L3I0|I3L3I0_HUMAN;tr|C9JFL5|C9JFL5_HUMAN;tr|E7EVS6|E7EVS6_HUMAN;tr|J3KT65|J3KT65_HUMAN;tr|F6QUT6|F6QUT6_HUMAN;tr|B8ZZJ2|B8ZZJ2_HUMAN;tr|A6NL76|A6NL76_HUMAN;tr|F6UVQ4|F6UVQ4_HUMAN;tr|A0A2R8Y793|A0A2R8Y79…	25685690	7.54889e+06	39168568	13882411	40460344	100867568	0	FALSE
SLTTSQYLMHEVAK+0.000	tr|A0A0C4DH52|A0A0C4DH52_HUMAN;sp|Q9NZB2|F120A_HUMAN;sp|Q9NZB2-2|F120A_HUMAN;sp|Q9NZB2-4|F120A_HUMAN;sp|Q9NZB2-5|F120A_HUMAN;sp|Q9NZB2-6|F120A_HUMAN	6.17204e+06	3.55547e+06	13909437	421790	13314457	35380432	0	FALSE
DLEFTIYDDDDVSPFLEGLEER+9.038PQR+9.038K+8.050	tr|F5GX11|F5GX11_HUMAN;sp|P25786|PSA1_HUMAN;sp|P25786-2|PSA1_HUMAN	14922345	14084567	22625314	3.38291e+06	22398976	49057292	0	FALSE
K+0.000EGGLGPLNIPLLADVTR+0.000	tr|A6NIW5|A6NIW5_HUMAN;sp|P32119|PRDX2_HUMAN	256227184	106592784	557885760	59904740	572351232	1050634752	0	FALSE
NFSEVFQK+0.000	sp|Q9UQE7|SMC3_HUMAN	4.64803e+06	529408	7.43113e+06	0	12680015	29196212	0	FALSE
SC+57.021QFVAVR+0.000	sp|P07814|SYEP_HUMAN	75755504	26300324	197808160	26174474	188813776	245241920	0	FALSE
IEAELQDIC+57.021NDVLELLDK+0.000YLIPNATQPESK+0.000	sp|P31946|1433B_HUMAN;sp|P31946-2|1433B_HUMAN	8968990	6.654e+06	28618110	13641019	32289700	53475060	0	FALSE
GDEELDSLIK+0.000	tr|C9J386|C9J386_HUMAN;tr|C9J0D1|C9J0D1_HUMAN;sp|Q71UI9|H2AV_HUMAN;sp|Q71UI9-2|H2AV_HUMAN;sp|Q71UI9-3|H2AV_HUMAN;sp|Q71UI9-4|H2AV_HUMAN;sp|P0C0S5|H2AZ_HUMAN	37384368	10932410	67649568	8976394	66427408	121316584	0	FALSE
VLTPELYAELR+0.000	tr|G3V461|G3V461_HUMAN;tr|G3V4N7|G3V4N7_HUMAN;sp|P12277|KCRB_HUMAN	24584160	49081140	20140862	11827785	31476686	28182350	0	FALSE
DIDSFVPSK+0.000	tr|E9PEJ4|E9PEJ4_HUMAN;tr|H0YDD4|H0YDD4_HUMAN;sp|P10515|ODP2_HUMAN	9909213	3.20087e+06	30970836	4286621	34184312	51817904	0	FALSE
K+0.000DAELLC+57.021WDLR+0.000	tr|E9PMG4|E9PMG4_HUMAN;sp|Q9BUR4|TCAB1_HUMAN	2.21051e+06	1.1941e+06	4.84239e+06	1.44094e+06	7.61331e+06	15295581	0	FALSE
GHR+0.000IEEVPELPLVVEDK+0.000VEGYK+0.000K+0.000	tr|H3BM89|H3BM89_HUMAN;sp|P36578|RL4_HUMAN	55847996	45097284	149293616	12856180	122750880	214707664	0	FALSE
FVDK+0.000LFEAVEEGR+0.000	sp|O43395|PRPF3_HUMAN	7957026	3.34735e+06	17599762	1.38973e+06	20975432	43072852	0	FALSE
DLEFTIYDDDDVSPFLEGLEER+0.000PQR+0.000K+0.000	tr|F5GX11|F5GX11_HUMAN;sp|P25786|PSA1_HUMAN;sp|P25786-2|PSA1_HUMAN	37111948	11758234	72611320	7.62085e+06	71080144	139735328	0	FALSE
WNLDELPK+0.000FEK+0.000	tr|J3QR02|J3QR02_HUMAN;tr|J3KTA4|J3KTA4_HUMAN;tr|J3QRQ7|J3QRQ7_HUMAN;tr|J3KRX8|J3KRX8_HUMAN;tr|X6RLV5|X6RLV5_HUMAN;tr|J3KTQ4|J3KTQ4_HUMAN;sp|P17844|DDX5_HUMAN;sp|P17844-2|DDX5_HUMAN	18061752	5134439	11338645	6.39994e+06	16478781	44828008	0	FALSE
GDLGIEIPAEK+0.000VFLAQK+0.000	tr|B4DNK4|B4DNK4_HUMAN;tr|H3BR70|H3BR70_HUMAN;tr|H3BTN5|H3BTN5_HUMAN;sp|P14618|KPYM_HUMAN;sp|P14618-2|KPYM_HUMAN;sp|P14618-3|KPYM_HUMAN;sp|P30613|KPYR_HUMAN;sp|P30613-2|KPYR_HUMAN	5.14851e+06	3399974	13735257	0	10230346	26679054	0	FALSE
SFVWHALDYADELPK+0.000PEQLAIR+0.000	sp|P49792|RBP2_HUMAN	7491873	1.12343e+06	26073122	1.88691e+06	24211870	42850704	0	FALSE
SGPFGQIFR+0.000PDNFVFGQSGAGNNWAK+0.000	tr|Q5ST81|Q5ST81_HUMAN;tr|Q5JP53|Q5JP53_HUMAN;tr|M0R1I1|M0R1I1_HUMAN;tr|M0QZL7|M0QZL7_HUMAN;tr|M0R278|M0R278_HUMAN;tr|M0QY85|M0QY85_HUMAN;sp|P04350|TBB4A_HUMAN;sp|P07437|TBB5_HUMAN;sp|Q13885|TBB2A_HUMAN;sp|P68371|TBB4B_HUMAN;sp|Q9BVA1|TBB2B_HUMAN	677979264	441897088	1522139520	133694104	1542754176	3152466432	0	FALSE
R+0.000YVEPPEMIGPM+15.995R+0.000PEQFSDEVEPATPEEGEPATQR+0.000	sp|Q4V321|GAG13_HUMAN;sp|Q6NT46|GAG2A_HUMAN;sp|Q13066|GAG2B_HUMAN;sp|Q9UEU5|GGE2D_HUMAN	17874144	6.59027e+06	21487038	9640493	16946494	37437268	0	FALSE
TGAELVTC+57.021GSVLK+0.000	sp|Q9HCN8|SDF2L_HUMAN	2943656	691087	1.77632e+06	0	5662396	18439600	0	FALSE
EDLYLK+0.000PIQR+0.000	sp|P13639|EF2_HUMAN	47907044	27709944	112228768	8430070	120426480	274036512	0	FALSE
EAVEK+0.000EFEPLLNWMK+0.000	sp|P14625|ENPL_HUMAN	23858190	9348821	54569212	8391295	52215328	90173816	0	FALSE
WIR+0.000ENISEWR+0.000	tr|A0A2R8Y7H4|A0A2R8Y7H4_HUMAN;tr|B1ALA9|B1ALA9_HUMAN;sp|P60891|PRPS1_HUMAN;sp|P60891-2|PRPS1_HUMAN	11164340	12631868	27941016	2631010	30218158	52394088	0	FALSE
MGANNLER+0.000	tr|A0A087X0X3|A0A087X0X3_HUMAN;tr|M0QZM1|M0QZM1_HUMAN;tr|M0R2I7|M0R2I7_HUMAN;sp|P52272|HNRPM_HUMAN;sp|P52272-2|HNRPM_HUMAN	61972464	23273374	151836624	12345948	150790736	313424224	0	FALSE
GLSQSALPYR+0.000	tr|J3KMX5|J3KMX5_HUMAN;tr|E9PS50|E9PS50_HUMAN;sp|P62277|RS13_HUMAN	15651109	11830503	31815622	8350432	21189818	44708580	0.000209315	FALSE
NIEIDSPYEISR+0.000APDELHYTYLDTFGR+0.000PVIVAYK+0.000K+0.000	tr|B7Z4L4|B7Z4L4_HUMAN;sp|P04843|RPN1_HUMAN	49761176	25625340	122050704	19941720	151126496	302982912	0	FALSE
ILSDDVPIR+0.000DYR+0.000	tr|K7ENJ0|K7ENJ0_HUMAN;tr|K7ELW1|K7ELW1_HUMAN;sp|P54725|RD23A_HUMAN;sp|P54725-2|RD23A_HUMAN;sp|P54725-3|RD23A_HUMAN	6624631	4.47413e+06	10165296	887012	8714845	21591298	0.000106883	FALSE
TR+0.000R+0.000DEPTGEVLSLVGK+0.000LEGTR+0.000	sp|O75643|U520_HUMAN;sp|O75643-2|U520_HUMAN	24173630	10284846	53730704	7.04737e+06	84735696	150882928	0.000677179	FALSE
SYC+57.021AEIAHNVSSK+0.000	tr|F8W727|F8W727_HUMAN;tr|D3YTB1|D3YTB1_HUMAN;sp|P62910|RL32_HUMAN	61962936	16542998	120530768	17807656	110245976	237242064	0	FALSE
K+0.000AC+57.021QIFVR+0.000	tr|A0A087X0X3|A0A087X0X3_HUMAN;tr|M0R2I7|M0R2I7_HUMAN;tr|M0QY96|M0QY96_HUMAN;sp|P52272|HNRPM_HUMAN;sp|P52272-2|HNRPM_HUMAN	38593484	16608607	115990672	11254908	108799216	182823136	0	FALSE
WSLLQQQK+0.000	tr|F8VP67|F8VP67_HUMAN;tr|F8VUG2|F8VUG2_HUMAN;tr|F8W1U3|F8W1U3_HUMAN;sp|P05787|K2C8_HUMAN;sp|P05787-2|K2C8_HUMAN	53824932	18864010	108638936	5302718	91760808	242053632	0	FALSE
K+0.000TVTAMDVVYALK+0.000R+0.000	sp|P62805|H4_HUMAN	14400419	4655321	33096836	6383451	42206348	46579240	0	FALSE
HTNFVEFR+0.000	tr|M0QYZ2|M0QYZ2_HUMAN;tr|M0QZ21|M0QZ21_HUMAN;tr|M0R0N4|M0R0N4_HUMAN;sp|P53680|AP2S1_HUMAN	27118188	56347156	4448712	53215868	87667264	762684	0	FALSE
DVHNIYGLYVHMATADGLR+0.000	tr|E9PKU7|E9PKU7_HUMAN;tr|F5H6X6|F5H6X6_HUMAN;sp|Q14697|GANAB_HUMAN;sp|Q14697-2|GANAB_HUMAN	8050102	260678	13099989	1250319	11108159	18634474	0	FALSE
SLGEIPIVESEIK+0.000K+0.000EAGELK+0.000PEEEITVGPVQK+0.000	sp|P53618|COPB_HUMAN	50632272	18921390	103220112	10844411	117331472	205553728	0	FALSE
LALDIEIATYR+0.000	tr|A0A1W2PRT3|A0A1W2PRT3_HUMAN;tr|A0A1X7SBR3|A0A1X7SBR3_HUMAN;tr|A0A1X7SCE1|A0A1X7SCE1_HUMAN;tr|K7EPI4|K7EPI4_HUMAN;tr|A0A1W2PQU7|A0A1W2PQU7_HUMAN;tr|A0A1W2PS58|A0A1W2PS58_HUMAN;tr|K7EMP8|K7EMP8_HUMAN;tr|A0A1W2PR46|A0A1W2PR46_HUMAN;tr|K7EJU1|K7EJU1_HUMAN;sp|Q6KB66|K2C80_HUMAN;sp|Q6KB66-2|K2C80_HUMAN;sp|Q6KB66-3|K2C80_HUMAN;sp|P19013|K2C4_HUMAN;sp|P14136|GFAP_HUMAN;sp|P14136-2|GFAP_HUMAN;sp|P14136…	2.09642e+06	223324	2.27408e+06	1.72264e+06	1463451	2183108	0	FALSE
YVATLGVEVHPLVFHTNR+0.000	tr|B5MDF5|B5MDF5_HUMAN;tr|F5H018|F5H018_HUMAN;tr|J3KQE5|J3KQE5_HUMAN;tr|H0YFC6|H0YFC6_HUMAN;sp|P62826|RAN_HUMAN	82570288	24386412	160386960	6.32965e+06	142689920	254088640	0	FALSE
TASLFEQK+0.000	sp|Q9NZM1|MYOF_HUMAN;sp|Q9NZM1-2|MYOF_HUMAN;sp|Q9NZM1-3|MYOF_HUMAN;sp|Q9NZM1-5|MYOF_HUMAN;sp|Q9NZM1-6|MYOF_HUMAN	10309497	1.99665e+06	23120620	23916.2	19571282	44892936	0	FALSE
LDR+0.000DSLVHSSPHVALSHVDAR+0.000	sp|Q9P2B2|FPRP_HUMAN	7.6887e+06	6352857	43316404	5.95983e+06	43216920	84134064	0	FALSE
GLHNVVYGIQR+0.000	sp|A5YKK6|CNOT1_HUMAN;sp|A5YKK6-2|CNOT1_HUMAN;sp|A5YKK6-3|CNOT1_HUMAN;sp|A5YKK6-4|CNOT1_HUMAN	6.26359e+06	544985	14113952	366395	17747720	29959836	0	FALSE
IYLTADNLVLNLQDESFTR+0.000	tr|J3KPX7|J3KPX7_HUMAN;sp|Q99623|PHB2_HUMAN;sp|Q99623-2|PHB2_HUMAN	902458	2.07156e+06	3.83443e+06	963668	2.5956e+06	5612463	0	FALSE
SSTSEGLLLK+0.000	sp|Q9BYD6|RM01_HUMAN	4.52096e+06	3.24437e+06	9122574	2.3806e+06	16693282	23735962	0	FALSE
ETPALTINR+0.000	tr|K7EJB1|K7EJB1_HUMAN;tr|K7ER88|K7ER88_HUMAN;tr|K7EME0|K7EME0_HUMAN;tr|A0A0B4J2A4|A0A0B4J2A4_HUMAN;tr|K7EJ68|K7EJ68_HUMAN;sp|P42765|THIM_HUMAN	16233950	4.70093e+06	29755630	1.00458e+06	30972248	63855412	0	FALSE
GGNLR+0.000DK+0.000LDGNELDLSLSDLNEVPVK+0.000ELAALPK+0.000	sp|Q96AG4|LRC59_HUMAN	15983648	0	33176830	0	15963140	39430372	0	FALSE
IDESIHLQLR+0.000	tr|B0QY90|B0QY90_HUMAN;tr|B0QY89|B0QY89_HUMAN;sp|Q9Y262|EIF3L_HUMAN;sp|Q9Y262-2|EIF3L_HUMAN	14834320	3.93046e+06	36052604	2133270	24948264	53434060	0	FALSE
INEEISVK+0.000	tr|B7Z4B8|B7Z4B8_HUMAN;tr|M0R3F1|M0R3F1_HUMAN;tr|M0QYZ0|M0QYZ0_HUMAN;tr|A0A0A0MRA5|A0A0A0MRA5_HUMAN;tr|M0QYM5|M0QYM5_HUMAN;tr|M0QYI8|M0QYI8_HUMAN;sp|Q9BUJ2|HNRL1_HUMAN;sp|Q9BUJ2-2|HNRL1_HUMAN;sp|Q9BUJ2-4|HNRL1_HUMAN	24846788	6925699	46932008	2.76391e+06	52841984	82611960	0	FALSE
IAVALEIGADLPSNHVIDR+0.000	tr|G3V580|G3V580_HUMAN;tr|G3V2X6|G3V2X6_HUMAN;sp|O14744|ANM5_HUMAN;sp|O14744-2|ANM5_HUMAN;sp|O14744-5|ANM5_HUMAN;sp|O14744-3|ANM5_HUMAN	15078315	4837902	28729294	1.95866e+06	30538436	46674792	0	FALSE
IDATQVEVNPFGETPEGQVVC+57.021FDAK+0.000	tr|E9PDQ8|E9PDQ8_HUMAN;sp|Q96I99|SUCB2_HUMAN;sp|Q96I99-2|SUCB2_HUMAN	17926810	7.43001e+06	40663060	16457493	27889908	53213772	0	FALSE
SHGFAAEFK+0.000	tr|H0YCK3|H0YCK3_HUMAN;tr|A0A3B3ISX1|A0A3B3ISX1_HUMAN;tr|A0A3B3IRQ9|A0A3B3IRQ9_HUMAN;sp|P55265|DSRAD_HUMAN;sp|P55265-2|DSRAD_HUMAN;sp|P55265-3|DSRAD_HUMAN;sp|P55265-4|DSRAD_HUMAN;sp|P55265-5|DSRAD_HUMAN	14652678	2.73963e+06	32209150	2.23577e+06	36413404	69250200	0	FALSE
LFQEC+57.021C+57.021PHSTDR+0.000	tr|Q5T6W2|Q5T6W2_HUMAN;sp|P61978|HNRPK_HUMAN;sp|P61978-2|HNRPK_HUMAN;sp|P61978-3|HNRPK_HUMAN	98133832	29825258	209688288	6.73826e+06	206236112	361818816	0	FALSE
LQLEATER+0.000	sp|Q15149|PLEC_HUMAN;sp|Q15149-2|PLEC_HUMAN;sp|Q15149-3|PLEC_HUMAN;sp|Q15149-4|PLEC_HUMAN;sp|Q15149-5|PLEC_HUMAN;sp|Q15149-6|PLEC_HUMAN;sp|Q15149-7|PLEC_HUMAN;sp|Q15149-8|PLEC_HUMAN;sp|Q15149-9|PLEC_HUMAN	65722924	15049344	104017800	38413292	105496048	226455952	0	FALSE
SVALYDC+57.021R+0.000	tr|B4DJV5|B4DJV5_HUMAN;sp|Q13610|PWP1_HUMAN	7952264	3.89794e+06	8330756	9915879	23827952	20416126	0.000106883	FALSE
K+0.000GYEVIYLTEPVDEYC+57.021IQALPEFDGK+0.000R+0.000	sp|P14625|ENPL_HUMAN	82195576	46096036	255042976	28402448	226635088	341806720	0	FALSE
WEK+0.000IAEAVPGR+0.000TK+0.000K+0.000DC+57.021M+15.995K+0.000R+0.000YK+0.000	sp|Q99543|DNJC2_HUMAN;sp|Q99543-2|DNJC2_HUMAN	53973240	71992.5	705965	621885	0	0	0.00935677	FALSE
LYSILGTTLK+0.000DEGK+0.000	sp|O75083|WDR1_HUMAN;sp|O75083-3|WDR1_HUMAN	16154722	3763336	34972252	1.03306e+06	26386152	54292224	0	FALSE
IEK+0.000ELEAVC+57.021QDVLSLLDNYLIK+0.000	sp|P61981|1433G_HUMAN	15586104	3.73979e+06	21817776	21876102	17361028	32951446	0	FALSE
GLVYETSVLDPDEGIR+0.000FR+0.000	tr|B4DJV2|B4DJV2_HUMAN;tr|H0YH82|H0YH82_HUMAN;tr|F8VZK9|F8VZK9_HUMAN;tr|F8VX68|F8VX68_HUMAN;tr|F8VPF9|F8VPF9_HUMAN;tr|F8VRP1|F8VRP1_HUMAN;tr|F8VX07|F8VX07_HUMAN;tr|F8VTT8|F8VTT8_HUMAN;tr|F8W642|F8W642_HUMAN;tr|A0A0C4DGI3|A0A0C4DGI3_HUMAN;tr|F8W1S4|F8W1S4_HUMAN;tr|F8W4S1|F8W4S1_HUMAN;tr|F8VPA1|F8VPA1_HUMAN;sp|O75390|CISY_HUMAN	1.73931e+06	1.23638e+06	6919768	0	10232708	18699814	0	FALSE
GPVFAPPYEPLPENVK+0.000	sp|P11387|TOP1_HUMAN	15717171	2.68966e+06	10479050	7.57426e+06	16289258	26146846	0	FALSE
AVDSPNIK+0.000	tr|H7BXY3|H7BXY3_HUMAN;sp|Q7L2E3|DHX30_HUMAN;sp|Q7L2E3-2|DHX30_HUMAN;sp|Q7L2E3-3|DHX30_HUMAN	17495584	7934575	20429640	4.01453e+06	40218508	54534248	0	FALSE
AR+0.000FEELNADLFR+0.000	tr|A8K7Q2|A8K7Q2_HUMAN;tr|E9PKE3|E9PKE3_HUMAN;tr|E9PNE6|E9PNE6_HUMAN;tr|E9PN89|E9PN89_HUMAN;sp|P54652|HSP72_HUMAN;sp|P11142|HSP7C_HUMAN;sp|P11142-2|HSP7C_HUMAN	46301812	66968284	33920908	0	22972482	63225840	0	FALSE
PADSAQR+0.000SQR+0.000R+0.000	XXX_sp|Q9BSE5|SPEB_HUMAN	5.99875e+06	1.04488	217962	2087115	0	702916	0.00691997	TRUE
DIISIAEDEDLR+0.000	tr|B1AHC9|B1AHC9_HUMAN;sp|P12956|XRCC6_HUMAN;sp|P12956-2|XRCC6_HUMAN	19321998	17805172	16636374	213129	8473792	24937888	0	FALSE
HK+0.000DAAIYLVTSLASK+0.000	sp|P55060|XPO2_HUMAN;sp|P55060-3|XPO2_HUMAN;sp|P55060-4|XPO2_HUMAN	33729052	15080452	90938472	7.21328e+06	96996472	162184320	0	FALSE
SGGAVLGR+0.000GK+0.000GGGVPPK+0.000PAGVAK+0.000	XXX_tr|C9JFF0|C9JFF0_HUMAN;XXX_sp|Q9ULI4|KI26A_HUMAN	32290228	1.31077e+06	0	1.1736	0	1.29493	0.00951423	TRUE
TIVITSHPGQIVK+0.000	sp|P31689|DNJA1_HUMAN;sp|P31689-2|DNJA1_HUMAN	29900592	8976933	47641796	8.27966e+06	88894392	204666704	0	FALSE
NYLSQPR+0.000	tr|E5RGH6|E5RGH6_HUMAN;tr|H0YAT8|H0YAT8_HUMAN;tr|H0YC04|H0YC04_HUMAN;sp|P21281|VATB2_HUMAN	7648645	3.78553e+06	18581818	10818614	20366832	58988548	0	FALSE
QGGGISNIGDGGR+11.032WEEGQGLVK+11.051	XXX_tr|E7ETU9|E7ETU9_HUMAN;XXX_tr|C9JXZ0|C9JXZ0_HUMAN;XXX_sp|O00469|PLOD2_HUMAN;XXX_sp|O00469-2|PLOD2_HUMAN	0	2.08765e+06	1.36431e+06	1.42808e+06	3.06351e+06	12978221	0.00789863	TRUE
LYR+0.000PGSVAYVSR+0.000	sp|P53396|ACLY_HUMAN;sp|P53396-2|ACLY_HUMAN;sp|P53396-3|ACLY_HUMAN	44857264	23924478	114903320	8.12923e+06	93421800	151622608	0	FALSE
SSILLDVK+0.000PWDDETDM+15.995AK+0.000LEEC+57.021VR+0.000	sp|P24534|EF1B_HUMAN	27383942	7.09242e+06	56725404	5171648	45515872	109138952	0	FALSE
LTQGETLR+0.000	tr|A0A0A0MTI1|A0A0A0MTI1_HUMAN;tr|H7C4B7|H7C4B7_HUMAN;sp|Q15392|DHC24_HUMAN;sp|Q15392-2|DHC24_HUMAN	14886379	14191821	35622652	1.48297e+06	39860076	82207216	0	FALSE
IK+0.000GDVPSVGLEGPDVDLQGPEAK+0.000	sp|Q09666|AHNK_HUMAN	8905885	2.47978e+06	19176210	3900393	18198612	35700400	0	FALSE
AGIQQVYTR+0.000	tr|A0A0C4DGX4|A0A0C4DGX4_HUMAN;sp|Q13616|CUL1_HUMAN	19485562	47902536	175934352	33642.1	10199610	55395208	0	FALSE
SNAHYNLQNAFNLAEQHLGLTK+0.000	tr|A0A087WUZ3|A0A087WUZ3_HUMAN;tr|F8W6C1|F8W6C1_HUMAN;sp|Q01082|SPTB2_HUMAN;sp|Q01082-2|SPTB2_HUMAN;sp|Q01082-3|SPTB2_HUMAN	0	4.80991e+06	1.48581e+06	8021291	0	8.27328e+06	0	FALSE
GIPLATGDTSPEPELLPGAPLPPPK+0.000EVINGNIK+0.000	tr|K7EL20|K7EL20_HUMAN;tr|K7ENA8|K7ENA8_HUMAN;tr|K7ER90|K7ER90_HUMAN;tr|K7EL60|K7EL60_HUMAN;sp|O75821|EIF3G_HUMAN	45848356	33407862	60308348	86474928	81726728	191172368	0	FALSE
LYR+0.000PGSVAYVSR+0.000	sp|P53396|ACLY_HUMAN;sp|P53396-2|ACLY_HUMAN;sp|P53396-3|ACLY_HUMAN	147618544	62859944	322100256	23213748	255849088	418537152	0	FALSE
YEAANWK+0.000	tr|G3V5Z7|G3V5Z7_HUMAN;tr|G3V3I1|G3V3I1_HUMAN;tr|G3V295|G3V295_HUMAN;sp|P60900|PSA6_HUMAN;sp|P60900-2|PSA6_HUMAN;sp|P60900-3|PSA6_HUMAN	13604829	2.38597e+06	28110378	1.8147e+06	33581080	58836444	0	FALSE
NLSDLIDLVPSLC+57.021EDLLSSVDQPLK+0.000	tr|B1AK85|B1AK85_HUMAN;tr|B1AK88|B1AK88_HUMAN;tr|B1AK87|B1AK87_HUMAN;sp|P47756|CAPZB_HUMAN;sp|P47756-2|CAPZB_HUMAN	1.01324e+06	3.77679e+06	4.88858e+06	3.76714e+06	6.41521e+06	14969182	0	FALSE
APTLASLENC+57.021MK+0.000	sp|Q9UGP8|SEC63_HUMAN	4.10202e+06	489545	8967479	726512	9876535	14469178	0	FALSE
DLNSDMDSILASLK+0.000	tr|H0YFD6|H0YFD6_HUMAN;tr|A0A2R8Y4F5|A0A2R8Y4F5_HUMAN;sp|P40939|ECHA_HUMAN	5.63844e+06	2276996	4.39397e+06	783156	6620418	19857504	0	FALSE
VLSSIEQK+0.000	sp|P31947|1433S_HUMAN;sp|P31947-2|1433S_HUMAN	392653984	102031024	844242176	64209016	790323264	1657890944	0	FALSE
VISSIEQK+0.000	tr|Q4VY19|Q4VY19_HUMAN;tr|A0A0J9YWZ2|A0A0J9YWZ2_HUMAN;tr|A0A0J9YWE8|A0A0J9YWE8_HUMAN;tr|E9PG15|E9PG15_HUMAN;tr|A2IDB2|A2IDB2_HUMAN;tr|Q4VY20|Q4VY20_HUMAN;sp|Q04917|1433F_HUMAN;sp|P27348|1433T_HUMAN;sp|P61981|1433G_HUMAN;sp|P31946|1433B_HUMAN;sp|P31946-2|1433B_HUMAN	392653984	102031024	844242176	64209016	790323264	1657890944	0	FALSE
FC+57.021VSC+57.021AR+0.000	sp|P26358|DNMT1_HUMAN;sp|P26358-2|DNMT1_HUMAN;sp|P26358-3|DNMT1_HUMAN	11736011	3.95212e+06	23795348	2.21203e+06	30032258	55039608	0	FALSE
ASLENSLR+0.000	tr|F8VZY9|F8VZY9_HUMAN;sp|P05783|K1C18_HUMAN	45256876	16359678	95686176	17302406	64355588	166186224	0	FALSE
IEYDTFGELK+0.000VPNDK+0.000YYGAQTVR+0.000	sp|P07954|FUMH_HUMAN;sp|P07954-2|FUMH_HUMAN	79492488	31670020	171158432	17564640	179019248	282981248	0	FALSE
IDATQVEVNPFGETPEGQVVC+57.021FDAK+4.025	tr|E9PDQ8|E9PDQ8_HUMAN;sp|Q96I99|SUCB2_HUMAN;sp|Q96I99-2|SUCB2_HUMAN	20195470	4913876	40844388	14940113	29033208	52404748	0	FALSE
FIIPQIVK+0.000	tr|A0A3B3IS95|A0A3B3IS95_HUMAN;tr|A8MW50|A8MW50_HUMAN;tr|C9J7H8|C9J7H8_HUMAN;sp|P07195|LDHB_HUMAN	1024633	228631	1.41903e+06	324778	1.81525e+06	4.46013e+06	0	FALSE
HIGLVYSGMGPDYR+11.032	tr|A0A024RA52|A0A024RA52_HUMAN;sp|P25787|PSA2_HUMAN	27548166	8665112	54915588	681408	57734052	106950088	0	FALSE
IK+0.000QLIELDYLNPGSIR+0.000	sp|Q9UHI6|DDX20_HUMAN	7.00712e+06	3.13454e+06	9303336	4186623	12876467	34814608	0	FALSE
NC+57.021IVLIDSTPYR+0.000	tr|Q5JR95|Q5JR95_HUMAN;sp|P62241|RS8_HUMAN	20320448	23523264	1.60596e+06	24402866	541090	17353968	0.00025997	FALSE
FSADLTC+57.021R+0.000	sp|Q7KZ85|SPT6H_HUMAN;sp|Q7KZ85-2|SPT6H_HUMAN	8696579	3599907	14080500	441207	31792624	41228972	0	FALSE
VEEIAASK+0.000	tr|M0R1A7|M0R1A7_HUMAN;tr|M0R117|M0R117_HUMAN;tr|M0R0P7|M0R0P7_HUMAN;tr|M0R3D6|M0R3D6_HUMAN;sp|Q02543|RL18A_HUMAN	46306068	13799149	129325560	4691145	104034424	145992656	0	FALSE
IPSAVGYQPTLATDMGTM+15.995QER+0.000	tr|F8W0P7|F8W0P7_HUMAN;tr|F8W079|F8W079_HUMAN;tr|H0YH81|H0YH81_HUMAN;tr|H0YI37|H0YI37_HUMAN;sp|P06576|ATPB_HUMAN	8.36085e+06	2.83141e+06	12534056	1.20472e+06	14645233	27203354	0	FALSE
HQPTAIIAK+0.000	tr|A0A0B4J1R6|A0A0B4J1R6_HUMAN;tr|E9PFF2|E9PFF2_HUMAN;sp|P29401|TKT_HUMAN;sp|P29401-2|TKT_HUMAN	694894784	224034448	1512892288	231233296	1290186496	2589401088	0	FALSE
DYLEHITSIGPR+0.000	tr|E7ER77|E7ER77_HUMAN;sp|Q7Z2K6|ERMP1_HUMAN	4800172	1.47973e+06	10842597	0	11944315	21046530	0	FALSE
K+0.000FYGPEGPYGVFAGR+0.000	sp|O00264|PGRC1_HUMAN	60429128	23195164	133432424	13200174	132206352	293347840	0	FALSE
MEADPELSK+0.000	sp|O75643|U520_HUMAN;sp|O75643-2|U520_HUMAN	6045956	6044781	9285032	1.01109e+06	13187986	26210688	0.00135379	FALSE
DQELYFFHELSPGSC+57.021FFLPK+0.000	sp|P26639|SYTC_HUMAN;sp|P26639-2|SYTC_HUMAN	7789550	2.02377e+06	12651336	4.2916e+06	12097177	18973072	0.00025997	FALSE
YIQDFQR+0.000	tr|E9PMM2|E9PMM2_HUMAN;tr|E9PKP7|E9PKP7_HUMAN;sp|P17480|UBF1_HUMAN;sp|P17480-2|UBF1_HUMAN	10391376	3.59885e+06	19804028	108909	18900212	42767872	0.000394536	FALSE
VSDYEMK+0.000	sp|P12004|PCNA_HUMAN	27733882	3.35474e+06	53927704	8495237	59744140	99736600	0	FALSE
IVNTPQGC+57.021LWYK+0.000	tr|B1AKJ5|B1AKJ5_HUMAN;tr|F5H7V1|F5H7V1_HUMAN;tr|G3V1R5|G3V1R5_HUMAN;sp|O43847|NRDC_HUMAN;sp|O43847-2|NRDC_HUMAN	17646528	4.20811e+06	35860848	6255658	37734572	66995132	0	FALSE
SPQENLVPC+57.021DVLLLR+0.000	sp|Q9HD20|AT131_HUMAN;sp|Q9HD20-2|AT131_HUMAN	17301190	3.9697e+06	15558497	40594744	0	5.93736e+06	0.00935677	FALSE
IIDPLPPIDHSEIDYPPFEK+0.000	tr|A0A0A0MSJ0|A0A0A0MSJ0_HUMAN;sp|Q86XP3|DDX42_HUMAN;sp|Q86XP3-2|DDX42_HUMAN	5729855	2.68691e+06	11164713	3672369	9450587	17302688	0	FALSE
TVWEISQK+0.000	tr|E9PL69|E9PL69_HUMAN;sp|P23921|RIR1_HUMAN	8744374	0	22696844	4.67134e+06	22129224	46590668	0	FALSE
GR+0.000SDYDGIGSR+0.000	tr|A0A2R8Y5G6|A0A2R8Y5G6_HUMAN;tr|A0A0D9SG12|A0A0D9SG12_HUMAN;tr|A0A2R8YFR4|A0A2R8YFR4_HUMAN;tr|A0A2R8Y650|A0A2R8Y650_HUMAN;tr|F6S8Q4|F6S8Q4_HUMAN;tr|A0A2R8YCU0|A0A2R8YCU0_HUMAN;tr|A0A2R8YDH3|A0A2R8YDH3_HUMAN;tr|A0A2R8YF89|A0A2R8YF89_HUMAN;tr|A0A2R8YF78|A0A2R8YF78_HUMAN;tr|A0A0D9SFB3|A0A0D9SFB3_HUMAN;tr|A0A2R8YCW1|A0A2R8YCW1_HUMAN;tr|A0A0D9SF53|A0A0D9SF53_HUMAN;tr|A0A2U3TZJ9|A0A2U3TZJ9_HUMAN;tr|A…	13138322	3663353	16218788	1.66424e+06	17290224	41816336	0	FALSE
GIPLATGDTSPEPELLPGAPLPPPK+0.000EVINGNIK+0.000	tr|K7EL20|K7EL20_HUMAN;tr|K7ENA8|K7ENA8_HUMAN;tr|K7ER90|K7ER90_HUMAN;tr|K7EL60|K7EL60_HUMAN;sp|O75821|EIF3G_HUMAN	25809896	16595264	31148502	46574332	41827168	94461160	0	FALSE
VINQILTEMDGMSTK+11.051	sp|P55072|TERA_HUMAN	9957378	3712386	24010322	4.40732e+06	19851258	55324084	0	FALSE
DGNASGTTLLEALDC+57.021ILPPTR+0.000PTDK+0.000PLR+0.000LPLQDVYK+0.000	tr|A0A087WV01|A0A087WV01_HUMAN;tr|A0A087WVQ9|A0A087WVQ9_HUMAN;sp|Q5VTE0|EF1A3_HUMAN;sp|P68104|EF1A1_HUMAN;sp|P68104-2|EF1A1_HUMAN	27796368	18032382	82714920	8411757	59867812	104321392	0	FALSE
ELVLDNSR+0.000	tr|H7BZ09|H7BZ09_HUMAN;tr|H0YN26|H0YN26_HUMAN;sp|P39687|AN32A_HUMAN	41552648	14295952	86223296	9259704	65794632	136290752	0	FALSE
TEMENEFVLIK+0.000K+0.000	tr|F8VP67|F8VP67_HUMAN;tr|F8VUG2|F8VUG2_HUMAN;tr|F8W1U3|F8W1U3_HUMAN;sp|P05787|K2C8_HUMAN;sp|P05787-2|K2C8_HUMAN	35162204	16632935	89637496	7299054	59952508	147525440	0	FALSE
M+15.995K+0.000EIAEAYLGYPVTNAVITVPAYFNDSQR+0.000	tr|A0A0G2JIW1|A0A0G2JIW1_HUMAN;sp|P0DMV9|HS71B_HUMAN;sp|P0DMV8|HS71A_HUMAN	11579886	8086382	18871830	9601696	16360947	39859860	0	FALSE
GNIPTLNR+0.000	sp|Q13085|ACACA_HUMAN;sp|Q13085-2|ACACA_HUMAN;sp|Q13085-3|ACACA_HUMAN;sp|Q13085-4|ACACA_HUMAN	5292534	972863	16956624	8536595	6143821	13304908	0.00015971	FALSE
VR+0.000VELSTGMPR+0.000	tr|A0A0B4J1Z1|A0A0B4J1Z1_HUMAN;tr|C9JAB2|C9JAB2_HUMAN;sp|Q16629|SRSF7_HUMAN;sp|Q16629-2|SRSF7_HUMAN;sp|Q16629-3|SRSF7_HUMAN;sp|Q16629-4|SRSF7_HUMAN	34189032	20981710	85942168	6502067	76214672	166092464	0	FALSE
YGTDLSR+0.000	tr|Q5TC02|Q5TC02_HUMAN;tr|Q5TC01|Q5TC01_HUMAN;sp|P05023|AT1A1_HUMAN;sp|P05023-2|AT1A1_HUMAN;sp|P05023-3|AT1A1_HUMAN;sp|P05023-4|AT1A1_HUMAN	62745172	33728988	116450080	6978255	275692512	231464608	0	FALSE
FLFENQTPAHVYYR+0.000	tr|E7ET15|E7ET15_HUMAN;sp|O15042|SR140_HUMAN;sp|O15042-2|SR140_HUMAN;sp|O15042-3|SR140_HUMAN	34278700	25632656	49765696	2598588	60327532	113308592	0	FALSE
K+0.000GDIVDIK+0.000	tr|G3V1B3|G3V1B3_HUMAN;tr|M0R181|M0R181_HUMAN;sp|P46778|RL21_HUMAN	105351608	43103112	246922032	21697642	211705776	376282720	0	FALSE
LLEMNLMHAPQVADAILGNQMFTHYDR+0.000	tr|A0A087WVQ6|A0A087WVQ6_HUMAN;sp|Q00610|CLH1_HUMAN;sp|Q00610-2|CLH1_HUMAN	31918540	5.92287e+06	70158872	9035350	47616408	56540192	0	FALSE
LLDEVFFSEK+11.051	tr|H0YKT8|H0YKT8_HUMAN;tr|H0YN18|H0YN18_HUMAN;tr|H0YMA1|H0YMA1_HUMAN;tr|H0YL69|H0YL69_HUMAN;tr|H0YLS6|H0YLS6_HUMAN;tr|H0YLC2|H0YLC2_HUMAN;tr|H0YMZ1|H0YMZ1_HUMAN;tr|H0YMI6|H0YMI6_HUMAN;sp|P25789|PSA4_HUMAN	0	47655804	7687837	1.51323e+06	3.31791e+06	7.68869e+06	0.000106883	FALSE
GPLPLSSQHR+0.000GDADQASNILASFGLSAR+0.000	tr|A8MXP9|A8MXP9_HUMAN;tr|D6R991|D6R991_HUMAN;tr|D6REM6|D6REM6_HUMAN;tr|A0A0R4J2E8|A0A0R4J2E8_HUMAN;sp|P43243|MATR3_HUMAN	55730576	30282098	128408984	14394809	142154288	289775520	0	FALSE
ALTVPELTQQVFDAK+8.050	tr|Q5ST81|Q5ST81_HUMAN;tr|Q5JP53|Q5JP53_HUMAN;sp|P07437|TBB5_HUMAN	23300294	9267701	29823476	6.02524e+06	42866128	87211504	0	FALSE
TNEQMHQLVAAYK+0.000DAYER+0.000	tr|E5RJF5|E5RJF5_HUMAN;tr|E5RK63|E5RK63_HUMAN;sp|P08133|ANXA6_HUMAN;sp|P08133-2|ANXA6_HUMAN	9384492	3.15009e+06	19969016	1.5003e+06	13714150	31117702	0.000356979	FALSE
YSGELSGIR+0.000	sp|Q9NQZ2|SAS10_HUMAN	26123644	10558988	40252184	10183131	44272200	73164184	0	FALSE
TIEK+0.000FEK+0.000	tr|A0A087WV01|A0A087WV01_HUMAN;tr|A0A2R8Y488|A0A2R8Y488_HUMAN;tr|A0A2R8YDN5|A0A2R8YDN5_HUMAN;tr|A0A087WVQ9|A0A087WVQ9_HUMAN;tr|Q5JR01|Q5JR01_HUMAN;tr|A6PW80|A6PW80_HUMAN;tr|A0A2U3TZH3|A0A2U3TZH3_HUMAN;tr|A0A2R8Y660|A0A2R8Y660_HUMAN;sp|Q5VTE0|EF1A3_HUMAN;sp|Q05639|EF1A2_HUMAN;sp|P68104|EF1A1_HUMAN;sp|P68104-2|EF1A1_HUMAN	111593568	42898296	319570880	25030290	288998656	546902080	0	FALSE
WDVSTTK+0.000	tr|V9GYZ6|V9GYZ6_HUMAN;tr|V9GZ76|V9GZ76_HUMAN;sp|P07814|SYEP_HUMAN	27720598	11856395	59168520	7.12204e+06	66287024	110259040	0	FALSE
LSDIPEGK+0.000	sp|P0C7P4|UCRIL_HUMAN;sp|P47985|UCRI_HUMAN	6.60306e+06	990915	9647735	1.1518e+06	20071514	27277894	0	FALSE
VSGLLVLDYSK+8.050DYNHWLATK+8.050	tr|E7EWJ3|E7EWJ3_HUMAN;tr|Q5R211|Q5R211_HUMAN;sp|P31327|CPSM_HUMAN;sp|P31327-3|CPSM_HUMAN	3.66633e+06	1.52912e+06	7953946	1.41169e+06	10641874	14827392	0	FALSE
IIETLTQQLQAK+0.000	sp|Q9UHV9|PFD2_HUMAN	6.93035e+06	1.37101e+06	11996440	848266	12190874	27166870	0	FALSE
NC+57.021IVLIDSTPYR+0.000	tr|Q5JR95|Q5JR95_HUMAN;sp|P62241|RS8_HUMAN	15791866	13738114	25341580	20133202	13324924	57544900	0.000356979	FALSE
SSLLTELSNSLTK+0.000	sp|Q9UBK9|UXT_HUMAN;sp|Q9UBK9-2|UXT_HUMAN	2.0936e+06	1.97915e+06	5648060	510523	6.45801e+06	9724321	0	FALSE
DAGQISGLNVLR+0.000	sp|P38646|GRP75_HUMAN	165580208	66932260	136505440	182359904	100378400	214782352	0	FALSE
K+0.000EPFTLEAYYSSPQDLPYPDPAIAQFSVQK+0.000	tr|A0A087WYC1|A0A087WYC1_HUMAN;sp|P34932|HSP74_HUMAN	51243944	32216822	128936320	51287360	118444040	211119056	0	FALSE
SADTLWGIQK+0.000ELQF	sp|P00338|LDHA_HUMAN;sp|P00338-3|LDHA_HUMAN;sp|P00338-4|LDHA_HUMAN	35964388	14347064	85042336	11399319	75335040	178069760	0	FALSE
FAEFQYLQPGPPR+0.000	tr|G3V119|G3V119_HUMAN;tr|E5RHJ4|E5RHJ4_HUMAN;tr|H0YB24|H0YB24_HUMAN;sp|Q8N163|CCAR2_HUMAN;sp|Q8N163-2|CCAR2_HUMAN	3.91773e+06	934273	5.30629e+06	3.18008e+06	6407911	15824909	0	FALSE
VLK+0.000EVEAVIPDHC+57.021IFASNTSALPISEIAAVSK+0.000R+0.000PEK+0.000	tr|H0YFD6|H0YFD6_HUMAN;tr|A0A2R8Y4F5|A0A2R8Y4F5_HUMAN;sp|P40939|ECHA_HUMAN	13850486	3056108	34681944	4.14347e+06	40897804	54580368	0	FALSE
VAGYAALLEQYQK+0.000	tr|M0R027|M0R027_HUMAN;tr|M0R2M1|M0R2M1_HUMAN;tr|M0R0Y2|M0R0Y2_HUMAN;tr|M0R058|M0R058_HUMAN;sp|P54920|SNAA_HUMAN	27510332	13532867	41042452	5167548	44912024	74231816	0	FALSE
TNYNDR+0.000YDEIR+0.000	tr|Q5T8U2|Q5T8U2_HUMAN;sp|P62424|RL7A_HUMAN	58692172	29629396	134570592	9301981	103049616	181774112	0	FALSE
GHPDLQGQPAEEIFESVGDR+0.000ELR+0.000	sp|P49257|LMAN1_HUMAN	2.80023e+06	0	17159028	2.21894e+06	17153394	42647512	0	FALSE
TATPQQAQEVHEK+0.000LR+0.000	tr|U3KPZ0|U3KPZ0_HUMAN;sp|P60174|TPIS_HUMAN;sp|P60174-1|TPIS_HUMAN;sp|P60174-4|TPIS_HUMAN	5251514	3879400	8969482	0	12313694	25268748	0	FALSE
DLISHDEMFSDIYK+0.000	tr|A0A0B4J2C3|A0A0B4J2C3_HUMAN;tr|Q5W0H4|Q5W0H4_HUMAN;sp|P13693|TCTP_HUMAN	3786176	1.45609e+06	6083312	8814060	2.23959e+06	15670790	0	FALSE
SGPFGQIFR+0.000PDNFVFGQSGAGNNWAK+0.000	tr|Q5ST81|Q5ST81_HUMAN;tr|Q5JP53|Q5JP53_HUMAN;tr|M0R1I1|M0R1I1_HUMAN;tr|M0QZL7|M0QZL7_HUMAN;tr|M0R278|M0R278_HUMAN;tr|M0QY85|M0QY85_HUMAN;sp|P04350|TBB4A_HUMAN;sp|P07437|TBB5_HUMAN;sp|Q13885|TBB2A_HUMAN;sp|P68371|TBB4B_HUMAN;sp|Q9BVA1|TBB2B_HUMAN	24158130	20168316	55791820	0	61102844	123297528	0	FALSE
HQVQLLGR+0.000	sp|Q9BUQ8|DDX23_HUMAN	23586360	8.33064e+06	55988912	4873442	59702968	127649792	0	FALSE
EAGSVSLR+0.000	tr|A0A0D9SGF6|A0A0D9SGF6_HUMAN;sp|Q13813|SPTN1_HUMAN;sp|Q13813-2|SPTN1_HUMAN	23617950	10284454	49602056	8.31621e+06	67616192	107305608	0.000356979	FALSE
EQLWLANEGLITR+11.032	tr|H0YLE8|H0YLE8_HUMAN;tr|A0A087WWP1|A0A087WWP1_HUMAN;tr|A0A0J9YXZ5|A0A0J9YXZ5_HUMAN;sp|P46940|IQGA1_HUMAN	2.58491e+06	2.04969e+06	6.29958e+06	3.89912e+06	2.00711e+06	10282165	0.000106883	FALSE
FTQAGSEVSALLGR+0.000	tr|F8W0P7|F8W0P7_HUMAN;tr|H0YH81|H0YH81_HUMAN;sp|P06576|ATPB_HUMAN	18596178	4.17036e+06	39682540	1.00881e+06	37893720	71508552	0	FALSE
GTIEINPR+0.000	sp|Q08257|QOR_HUMAN;sp|Q08257-2|QOR_HUMAN;sp|Q08257-3|QOR_HUMAN	21919178	6.42994e+06	28219016	1.04086e+06	24594618	36661468	0	FALSE
SHTFPELAYR+0.000	sp|Q9NSD9|SYFB_HUMAN;sp|Q9NSD9-2|SYFB_HUMAN	9317536	2.0553e+06	17216212	4.63185e+06	15385189	30386564	0	FALSE
SSAK+11.051R+11.032NGGGGGGGGGGGGGSGHSK+11.051SAHSR+11.032GGR+11.032	XXX_sp|Q6P158|DHX57_HUMAN;XXX_sp|Q6P158-2|DHX57_HUMAN	0	0	0	0	0	25198044	0.00344422	TRUE
DNNLLGR+0.000	tr|V9GZ37|V9GZ37_HUMAN;tr|A0A0G2JIW1|A0A0G2JIW1_HUMAN;tr|Q53FA3|Q53FA3_HUMAN;sp|P0DMV9|HS71B_HUMAN;sp|P17066|HSP76_HUMAN;sp|P34931|HS71L_HUMAN;sp|P0DMV8|HS71A_HUMAN;sp|P0DMV8-2|HS71A_HUMAN	25869266	12992613	75485976	11959746	77484832	183469168	0	FALSE
DEFEGLFK+11.051QPAENVNQYLTDPK+11.051	tr|Q5JRR6|Q5JRR6_HUMAN;sp|P22314|UBA1_HUMAN;sp|P22314-2|UBA1_HUMAN	3.71275e+06	0	3.25967e+06	0	2.5707e+06	6.10151e+06	0	FALSE
WVIYNDQK+0.000	sp|P45974|UBP5_HUMAN;sp|P45974-2|UBP5_HUMAN	8396079	2665050	16102764	11722003	19093516	25470606	0	FALSE
GYGFGLIK+8.050	tr|C9JI87|C9JI87_HUMAN;sp|P21796|VDAC1_HUMAN	2.7961e+06	0	3830617	620070	2797874	5.43146e+06	0	FALSE
K+0.000HEAIETDIAAYEER+0.000	tr|A0A087WUZ3|A0A087WUZ3_HUMAN;tr|F8W6C1|F8W6C1_HUMAN;sp|Q01082|SPTB2_HUMAN;sp|Q01082-2|SPTB2_HUMAN;sp|Q01082-3|SPTB2_HUMAN	5891158	857353	10596905	2.41568e+06	10956800	24159848	0.00323116	FALSE
LEAEIATYR+0.000R+0.000	tr|F8VZY9|F8VZY9_HUMAN;sp|P05783|K1C18_HUMAN	87429712	45226684	214906208	14618388	150321488	402460416	0	FALSE
NFPNAIEHTLQWAR+0.000	sp|P22314|UBA1_HUMAN;sp|P22314-2|UBA1_HUMAN	33258104	10835480	71621312	1.48131e+06	70073064	115196848	0	FALSE
K+0.000QVVNIPSFIVR+0.000	tr|A0A024R4M0|A0A024R4M0_HUMAN;sp|P46781|RS9_HUMAN	30975996	16813052	63306524	3.03321e+06	58907016	102172152	0	FALSE
GDISISGPK+0.000	sp|Q09666|AHNK_HUMAN	9527813	5832007	24777538	519249	14855909	22517250	0.000106883	FALSE
YK+0.000ASQDPFPAAIILK+0.000	tr|E5RFX4|E5RFX4_HUMAN;sp|Q96KB5|TOPK_HUMAN;sp|Q96KB5-2|TOPK_HUMAN	12022719	3317654	33876156	2.19609e+06	32884596	69693880	0	FALSE
VTGEVLDILTR+0.000LPESVER+0.000	tr|A0A140T974|A0A140T974_HUMAN;tr|A0A140T9W4|A0A140T9W4_HUMAN;tr|A0A140T9R1|A0A140T9R1_HUMAN;sp|O75955|FLOT1_HUMAN;sp|O75955-2|FLOT1_HUMAN	18918168	12322066	46872164	2.94268e+06	50110740	94528704	0	FALSE
FHEIC+57.021SNLVK+11.051	tr|H3BPJ2|H3BPJ2_HUMAN;tr|H3BN98|H3BN98_HUMAN;sp|Q15041|AR6P1_HUMAN;sp|Q15041-2|AR6P1_HUMAN	8856272	3.0249e+06	17666190	5.45836e+06	11984267	28472842	0.000106883	FALSE
VLLSLEHGLWAPNLHFHSPNPEIPALLDGR+9.038	tr|A0A0U1RQF0|A0A0U1RQF0_HUMAN;sp|P49327|FAS_HUMAN	37905744	35599760	32435238	8581853	102459672	29883798	0	FALSE
YVLHC+57.021QGTEEEK+11.051	tr|B7Z7P8|B7Z7P8_HUMAN;sp|P62495|ERF1_HUMAN;sp|P62495-2|ERF1_HUMAN	5204616	1.00964e+06	18652358	3.05521e+06	17190244	30556330	0	FALSE
AVEEK+4.025IEWLESHQDADIEDFK+4.025AK+4.025	sp|P11021|BIP_HUMAN	10678778	6001724	46743808	9114392	49823408	122583288	0	FALSE
LGEM+15.995WNNTAADDK+11.051QPYEK+11.051	tr|Q5T7C4|Q5T7C4_HUMAN;sp|P09429|HMGB1_HUMAN	0	0	2.38454e+06	0	4.62303e+06	6.60221e+06	0.00226435	FALSE
ER+0.000PETVLIDLIQR+0.000	sp|Q7L7X3|TAOK1_HUMAN;sp|Q7L7X3-2|TAOK1_HUMAN;sp|Q7L7X3-3|TAOK1_HUMAN	4.77497e+06	3.37827e+06	9899330	920725	11880502	21276764	0	FALSE
GAHNGQGLGNAFLSHISAC+57.021DGIFHLTR+0.000	tr|J3KQ32|J3KQ32_HUMAN;sp|Q9NTK5|OLA1_HUMAN;sp|Q9NTK5-3|OLA1_HUMAN	43187472	5.40368e+06	28591114	12385357	1.73665e+06	73944752	0.000394536	FALSE
TFAGNTPLHLAAGLGYPTLTR+9.038	sp|Q00653|NFKB2_HUMAN;sp|Q00653-4|NFKB2_HUMAN	4648683	3.21551e+06	11659496	6868097	9658400	22775108	0	FALSE
EAVTHIGR+0.000	tr|D6RBW1|D6RBW1_HUMAN;sp|P06730|IF4E_HUMAN;sp|P06730-2|IF4E_HUMAN;sp|P06730-3|IF4E_HUMAN	23565058	107451888	87581640	2.37066e+06	22299064	42032528	0.000356979	FALSE
FLPR+0.000EEGPYEVEVTYDGVPVPGSPFPLEAVAPTK+0.000PSK+0.000	tr|Q60FE5|Q60FE5_HUMAN;tr|A0A087WWY3|A0A087WWY3_HUMAN;sp|P21333|FLNA_HUMAN;sp|P21333-2|FLNA_HUMAN	14412506	14731700	26030416	4159499	27720332	64483520	0	FALSE
NLLESYHVPELIK+11.051DAHLLVESK+11.051	sp|P42704|LPPRC_HUMAN	43220008	20397588	100509096	17174046	99466768	155138416	0	FALSE
VGQTIER+0.000	tr|A0A087X0X3|A0A087X0X3_HUMAN;tr|M0QZM1|M0QZM1_HUMAN;tr|M0R2I7|M0R2I7_HUMAN;sp|P52272|HNRPM_HUMAN;sp|P52272-2|HNRPM_HUMAN	76841880	25856676	180554688	20983272	190090032	409425696	0.00122934	FALSE
SGPFGQIFR+9.038PDNFVFGQSGAGNNWAK+8.050	tr|Q5ST81|Q5ST81_HUMAN;tr|Q5JP53|Q5JP53_HUMAN;tr|M0R1I1|M0R1I1_HUMAN;tr|M0QZL7|M0QZL7_HUMAN;tr|M0R278|M0R278_HUMAN;tr|M0QY85|M0QY85_HUMAN;sp|P04350|TBB4A_HUMAN;sp|P07437|TBB5_HUMAN;sp|Q13885|TBB2A_HUMAN;sp|P68371|TBB4B_HUMAN;sp|Q9BVA1|TBB2B_HUMAN	709027776	441668896	1539969536	311561088	1517543296	3166320640	0	FALSE
WAEALR+11.032EISGR+11.032	sp|P38606|VATA_HUMAN;sp|P38606-2|VATA_HUMAN	2.44238e+06	3341257	1.99533e+06	102491016	185336096	133808536	0.00518779	FALSE
K+11.051GESGQSWPR+11.032	tr|A0A087WYT3|A0A087WYT3_HUMAN;tr|B4DDC6|B4DDC6_HUMAN;sp|Q15185|TEBP_HUMAN;sp|Q15185-3|TEBP_HUMAN;sp|Q15185-4|TEBP_HUMAN	7.28551e+06	4672051	13552790	1.17463e+06	12822229	26447648	0	FALSE
GSALAALHC+57.021GR+3.988PPESPVNYGSPPSIADTLFSR+3.988	sp|Q8WWQ0|PHIP_HUMAN	10813168	8192306	21705864	4.22257e+06	23964936	32190642	0.00025997	FALSE
IEVEK+0.000PFAIAK+0.000E	sp|P23284|PPIB_HUMAN	96365160	35349220	223881824	27073858	219240240	431183712	0	FALSE
DSFPNFLAC+57.021K+4.025	sp|P17568|NDUB7_HUMAN	9399468	3.92607e+06	16697850	3.4151e+06	26337738	41842084	0	FALSE
YGYEIPVDMLC+57.021K+11.051R+11.032	tr|G3V5Z7|G3V5Z7_HUMAN;tr|G3V3I1|G3V3I1_HUMAN;tr|G3V295|G3V295_HUMAN;sp|P60900|PSA6_HUMAN;sp|P60900-2|PSA6_HUMAN;sp|P60900-3|PSA6_HUMAN	15241066	7205836	43483484	4108241	48137000	88059072	0	FALSE
SFDFEIETK+11.051	sp|Q08945|SSRP1_HUMAN	53372700	4.11416e+06	24180344	22273076	26822882	2.74939e+06	0.000209315	FALSE
R+0.000DNYVPEVSALDQEIIEVDPDTK+0.000EMLK+0.000	tr|A0A075B716|A0A075B716_HUMAN;tr|H3BNC9|H3BNC9_HUMAN;tr|H0YN88|H0YN88_HUMAN;sp|P08708|RS17_HUMAN	95300864	44505524	205400656	27554716	157765248	303322720	0	FALSE
GFGDVGEAK+0.000	tr|F8W726|F8W726_HUMAN;sp|Q14157|UBP2L_HUMAN;sp|Q14157-1|UBP2L_HUMAN;sp|Q14157-3|UBP2L_HUMAN;sp|Q14157-4|UBP2L_HUMAN;sp|Q14157-5|UBP2L_HUMAN	5.88071e+06	2.35722e+06	15842211	16184275	11684488	35216584	0	FALSE
GYGFGLIK+0.000	tr|C9JI87|C9JI87_HUMAN;sp|P21796|VDAC1_HUMAN	2.1024e+06	172898	1.83906e+06	442060	1.74409e+06	3.95516e+06	0	FALSE
NFPNAIEHTLQWAR+0.000	sp|P22314|UBA1_HUMAN;sp|P22314-2|UBA1_HUMAN	1.68486e+06	0	607607	5.87166e+06	0	2221859	0	FALSE
ASTSDYQVISDR+0.000	sp|Q8NFH5|NUP35_HUMAN;sp|Q8NFH5-2|NUP35_HUMAN;sp|Q8NFH5-3|NUP35_HUMAN	7.91041e+06	429904	3926520	1.8867e+06	3.06976e+06	5.15614e+06	0	FALSE
R+0.000LEEQAAQHK+0.000	sp|Q15149|PLEC_HUMAN;sp|Q15149-2|PLEC_HUMAN;sp|Q15149-3|PLEC_HUMAN;sp|Q15149-4|PLEC_HUMAN;sp|Q15149-5|PLEC_HUMAN;sp|Q15149-6|PLEC_HUMAN;sp|Q15149-7|PLEC_HUMAN;sp|Q15149-8|PLEC_HUMAN;sp|Q15149-9|PLEC_HUMAN	13280967	5845342	25418496	6102435	25921020	61388824	0	FALSE
GC+57.021FYPHAFNVK+0.000	tr|E9PL17|E9PL17_HUMAN;sp|Q92989|CLP1_HUMAN;sp|Q92989-2|CLP1_HUMAN	6.73497e+06	1.63421e+06	12493070	4381270	12225133	23294022	0	FALSE
K+0.000FLDGIYVSEK+0.000	tr|A0A2R8Y5Y7|A0A2R8Y5Y7_HUMAN;tr|H0Y9V9|H0Y9V9_HUMAN;tr|H0Y9R4|H0Y9R4_HUMAN;tr|D6RAN4|D6RAN4_HUMAN;sp|P32969|RL9_HUMAN	59851668	23043868	147424400	6.12264e+06	123511552	233018800	0	FALSE
SVYAHFPINVVIQENGSLVEIR+11.032	tr|E7ESE0|E7ESE0_HUMAN;tr|A0A2R8Y5Y7|A0A2R8Y5Y7_HUMAN;tr|H0Y9V9|H0Y9V9_HUMAN;tr|D6RAN4|D6RAN4_HUMAN;sp|P32969|RL9_HUMAN	11750417	15949263	7564209	49197384	0	15054564	0.0008716	FALSE
LMEPIYLVEIQC+57.021PEQVVGGIYGVLNR+3.988	sp|P13639|EF2_HUMAN	16485810	4.30437e+06	26605452	6380216	19970894	46156312	0	FALSE
LQGDANNLHGFEVDSR+0.000	tr|C9JLU1|C9JLU1_HUMAN;sp|P52434|RPAB3_HUMAN;sp|P52434-2|RPAB3_HUMAN;sp|P52434-3|RPAB3_HUMAN;sp|P52434-5|RPAB3_HUMAN	5151060	737207	12016301	752108	11682667	19369784	0	FALSE
GHR+3.988IEEVPELPLVVEDK+4.025VEGYK+4.025K+4.025	tr|H3BM89|H3BM89_HUMAN;sp|P36578|RL4_HUMAN	459709728	192835152	1061836864	82354560	936647808	1580046720	0	FALSE
K+0.000VEDLAR+0.000	tr|H7C452|H7C452_HUMAN;sp|Q9NVP1|DDX18_HUMAN	26814862	114376224	222649904	2.64048e+06	37881092	76212768	0.000394536	FALSE
NQVAM+15.995NPQNTVFDAK+0.000R+0.000	tr|Q53FA3|Q53FA3_HUMAN;sp|P34931|HS71L_HUMAN	32187120	6603935	53926916	9724711	49691664	129113328	0.000356979	FALSE
FSM+15.995VVQDGIVK+8.050	sp|P30044|PRDX5_HUMAN;sp|P30044-2|PRDX5_HUMAN;sp|P30044-3|PRDX5_HUMAN;sp|P30044-4|PRDX5_HUMAN	5.26822e+06	1.17953e+06	8164199	4776676	12092382	16754037	0	FALSE
C+57.021DENILWLDYK+8.050	tr|B4DNK4|B4DNK4_HUMAN;tr|H3BQ34|H3BQ34_HUMAN;tr|H3BTJ2|H3BTJ2_HUMAN;tr|H3BTN5|H3BTN5_HUMAN;tr|H3BUW1|H3BUW1_HUMAN;sp|P14618|KPYM_HUMAN;sp|P14618-2|KPYM_HUMAN;sp|P14618-3|KPYM_HUMAN	7.24032e+06	2.23093e+06	22252952	3.80984e+06	18595604	40605484	0	FALSE
YLTVAAVFR+3.988	tr|Q5ST81|Q5ST81_HUMAN;tr|Q5JP53|Q5JP53_HUMAN;sp|P04350|TBB4A_HUMAN;sp|P07437|TBB5_HUMAN;sp|P68371|TBB4B_HUMAN	6727712	2.70235e+06	22762268	3.82752e+06	13207476	33247728	0	FALSE
IC+57.021QIVSTR+0.000	tr|E9PB90|E9PB90_HUMAN;sp|P52789|HXK2_HUMAN	12102134	2699943	29886850	4992587	64265284	85378568	0.00276656	FALSE
LK+8.050GIEEEEILPGFILC+57.021DPNNLC+57.021HSGR+9.038	tr|H3BR35|H3BR35_HUMAN;sp|P15170|ERF3A_HUMAN;sp|P15170-2|ERF3A_HUMAN;sp|P15170-3|ERF3A_HUMAN	122885200	80581408	325090432	31385162	308730752	521138208	0	FALSE
YQAEIPDR+0.000LVEGESDNR+0.000NQQK+0.000	sp|O94776|MTA2_HUMAN	9906558	6855751	17040970	1.57139e+06	24593424	41041780	0.000356979	FALSE
VATPVDWK+0.000DGDSVM+15.995VLPTIPEEEAK+0.000	sp|P30041|PRDX6_HUMAN	52207280	29382258	109136944	24749754	84022112	179044448	0	FALSE
LYDLNHNEIGELIR+11.032	sp|O75643|U520_HUMAN	43293352	15076929	79913648	1.42563e+06	109823168	199121808	0	FALSE
VAAYDK+0.000LEK+0.000	sp|P35579|MYH9_HUMAN	32469660	15311111	71596616	8582469	48854772	144386496	0	FALSE
TLDSWR+11.032DEFLIQASPR+11.032DPENFPFVVLGNK+11.051IDLENR+11.032	tr|C9J592|C9J592_HUMAN;sp|P51149|RAB7A_HUMAN	40484164	26208718	16202927	8397110	8648779	17553068	0	FALSE
LEDLNFPEIK+4.025R+3.988	sp|Q9Y3T9|NOC2L_HUMAN	6063234	4392854	4921197	3.67863e+06	21340394	35862640	0	FALSE
VQEVPK+0.000LK+0.000	tr|G3V203|G3V203_HUMAN;tr|H0YHA7|H0YHA7_HUMAN;tr|J3QQ67|J3QQ67_HUMAN;tr|F8VYV2|F8VYV2_HUMAN;tr|A0A075B7A0|A0A075B7A0_HUMAN;tr|F8VUA6|F8VUA6_HUMAN;sp|Q07020|RL18_HUMAN;sp|Q07020-2|RL18_HUMAN	19682372	8100161	49105772	2.05857e+06	48283004	59748852	0	FALSE
LVEK+0.000PSPLTLAPHDFANIK+0.000	sp|P53618|COPB_HUMAN	11176195	7.19702e+06	43929904	25258358	38756572	65080160	0	FALSE
HALGQYVQAFR+0.000	sp|Q9Y5Q9|TF3C3_HUMAN	1.7824e+06	326202	2.74545e+06	742167	8308104	15597169	0	FALSE
GK+0.000GEGDLSQLSK+0.000	sp|Q9P013|CWC15_HUMAN	7.04644e+06	2.00274e+06	14642561	1.2354e+06	15196732	32807252	0	FALSE
K+11.051EPFTLEAYYSSPQDLPYPDPAIAQFSVQK+11.051	tr|A0A087WYC1|A0A087WYC1_HUMAN;sp|P34932|HSP74_HUMAN	51209152	32220272	132585960	52614876	117626880	211129360	0	FALSE
GVEITGFPEAQALGLEVFHAGTALK+11.051NGK+11.051VVTHGGR+11.032	sp|P22102|PUR2_HUMAN;sp|P22102-2|PUR2_HUMAN	3.05617e+06	2896249	10697750	4848242	12807413	18624078	0	FALSE
TLMNLGGLAVAR+11.032DDGLFSGDPNWFPK+11.051	tr|X6RJP6|X6RJP6_HUMAN;sp|P37802|TAGL2_HUMAN;sp|P37802-2|TAGL2_HUMAN	25897156	9265194	56543480	4.85035e+06	57043072	100817288	0	FALSE
NDEK+4.025TPQGAVPAYLLDR+3.988	tr|A0A0A0MQZ6|A0A0A0MQZ6_HUMAN;sp|O95478|NSA2_HUMAN	0	11940443	19346924	5.38475e+06	13538499	27699548	0.00025997	FALSE
IK+0.000DAFDR+0.000NPELQNLLLDDFFK+0.000	sp|P52209|6PGD_HUMAN;sp|P52209-2|6PGD_HUMAN	11151120	3.02386e+06	23470460	2142753	22126864	28417884	0.00148208	FALSE
AQNTWGC+57.021GNSLR+0.000	tr|Q5TCI8|Q5TCI8_HUMAN;tr|A0A0C4DGC5|A0A0C4DGC5_HUMAN;sp|P02545|LMNA_HUMAN;sp|P02545-2|LMNA_HUMAN;sp|P02545-3|LMNA_HUMAN;sp|P02545-4|LMNA_HUMAN;sp|P02545-5|LMNA_HUMAN;sp|P02545-6|LMNA_HUMAN	4448265	54908192	176111440	890279	164829120	224556784	0	FALSE
FELSC+57.021YSLAPQIK+4.025	tr|Q5T6L6|Q5T6L6_HUMAN;sp|P00966|ASSY_HUMAN	7270463	1.45817e+06	11789259	2.19738e+06	11095878	15690145	0.00264236	FALSE
TDQLPFEK+0.000	sp|Q9UNI6|DUS12_HUMAN	10171295	4998445	31434770	791148	13073769	27250548	0.00025997	FALSE
R+0.000LQTSSVLVSGLR+0.000	tr|Q5JRS2|Q5JRS2_HUMAN;tr|Q5JRS3|Q5JRS3_HUMAN;tr|Q5JRS0|Q5JRS0_HUMAN;tr|Q5JRS1|Q5JRS1_HUMAN;tr|Q5JRR9|Q5JRR9_HUMAN;sp|P22314|UBA1_HUMAN;sp|P22314-2|UBA1_HUMAN	14317932	8507092	37858716	1.06835e+06	37358800	78735304	0	FALSE
IM+15.995WSQR+0.000	tr|B1ANR0|B1ANR0_HUMAN;tr|B1ANR1|B1ANR1_HUMAN;tr|E7EQV3|E7EQV3_HUMAN;tr|E5RJB9|E5RJB9_HUMAN;tr|E5RGH3|E5RGH3_HUMAN;tr|A0A087WTT1|A0A087WTT1_HUMAN;tr|H0YEQ8|H0YEQ8_HUMAN;tr|E5RH24|E5RH24_HUMAN;tr|E7ERJ7|E7ERJ7_HUMAN;sp|Q4VXU2|PAP1L_HUMAN;sp|Q4VXU2-2|PAP1L_HUMAN;sp|Q5JQF8|PAP1M_HUMAN;sp|Q13310|PABP4_HUMAN;sp|Q13310-2|PABP4_HUMAN;sp|Q13310-3|PABP4_HUMAN;sp|P11940|PABP1_HUMAN;sp|P11940-2|PABP1_HUMAN;…	16609618	13392837	27582504	25235808	13305543	36101764	0.000356979	FALSE
LM+15.995WSQR+0.000	sp|P0CB38|PAB4L_HUMAN	16609618	13392837	27582504	25235808	13305543	36101764	0.000356979	FALSE
EFSFEAWNAK+0.000	sp|P78347|GTF2I_HUMAN;sp|P78347-2|GTF2I_HUMAN;sp|P78347-3|GTF2I_HUMAN;sp|P78347-4|GTF2I_HUMAN	4485079	2.97741e+06	3463115	1.04885e+06	8822638	19150506	0.000585995	FALSE
R+1.994EPFLLSGGDDGALK+1.994IWDLR+1.994	sp|Q9BQ67|GRWD1_HUMAN	4.68545e+06	2628262	13802760	1.01059e+06	14363847	28695332	0	FALSE
ALLFIPR+0.000	sp|P08238|HS90B_HUMAN	5.30494e+06	2.06292e+06	10254285	149910	0	0	0.000394536	FALSE
FVDGLM+15.995IHSGDPVNYYVDTAVR+3.988	tr|H0YEU2|H0YEU2_HUMAN;tr|E9PL09|E9PL09_HUMAN;tr|E9PSF4|E9PSF4_HUMAN;sp|P23396|RS3_HUMAN;sp|P23396-2|RS3_HUMAN	0	7167072	5732729	4.81853e+06	2.00005e+06	13121834	0	FALSE
MSMK+11.051EVDEQMLNVQNK+11.051	tr|Q5ST81|Q5ST81_HUMAN;tr|Q5JP53|Q5JP53_HUMAN;sp|P07437|TBB5_HUMAN;sp|Q13885|TBB2A_HUMAN;sp|P68371|TBB4B_HUMAN;sp|Q9BVA1|TBB2B_HUMAN	1.32388e+06	1.70119e+06	6652895	1.04419e+06	4694901	10912298	0	FALSE
FHEIC+57.021SNLVK+0.000	tr|H3BPJ2|H3BPJ2_HUMAN;tr|H3BN98|H3BN98_HUMAN;sp|Q15041|AR6P1_HUMAN;sp|Q15041-2|AR6P1_HUMAN	8737537	1.69982e+06	9604493	2.09285e+06	12265253	26331910	0.000106883	FALSE
ITLEC+57.021LPQNVGFYK+0.000	tr|G3V5E4|G3V5E4_HUMAN;sp|Q96EK6|GNA1_HUMAN	15694580	3093682	16323888	5.24633e+06	8.2231e+06	12842365	0	FALSE
FASFNAYENHLK+0.000	sp|Q969S3|ZN622_HUMAN	12509259	7.47273e+06	9120566	794565	4.97723e+06	17697666	0	FALSE
TAVC+57.021DIPPR+0.000	tr|Q5SQY0|Q5SQY0_HUMAN;tr|Q5ST81|Q5ST81_HUMAN;tr|Q5JP53|Q5JP53_HUMAN;tr|A0A075B736|A0A075B736_HUMAN;sp|P04350|TBB4A_HUMAN;sp|P07437|TBB5_HUMAN;sp|Q13885|TBB2A_HUMAN;sp|P68371|TBB4B_HUMAN;sp|Q3ZCM7|TBB8_HUMAN;sp|A6NNZ2|TBB8L_HUMAN;sp|Q9BVA1|TBB2B_HUMAN	13107109	43785244	147357184	14394297	143265248	293125344	0.00398355	FALSE
MLPTIIADNAGYDSADLVAQLR+3.988	tr|F5GWF6|F5GWF6_HUMAN;sp|P78371|TCPB_HUMAN;sp|P78371-2|TCPB_HUMAN	40012156	9979400	73304024	8472989	72289120	152370720	0	FALSE
DLLDTVLPHLYNETK+8.050	tr|A0A0C4DGH5|A0A0C4DGH5_HUMAN;sp|Q86VP6|CAND1_HUMAN;sp|Q86VP6-2|CAND1_HUMAN	7516705	3.13417e+06	18836648	1.9831e+06	17761878	39606892	0	FALSE
VLSR+0.000PNAQELPSM+15.995YQR+0.000	tr|J3KPX7|J3KPX7_HUMAN;tr|F5H3X6|F5H3X6_HUMAN;tr|F5GWA7|F5GWA7_HUMAN;tr|F5GY37|F5GY37_HUMAN;sp|Q99623|PHB2_HUMAN;sp|Q99623-2|PHB2_HUMAN	7.00653e+06	8390791	4.14307e+06	0	4.91831e+06	6348490	0.00621647	FALSE
GHPDLQGQPAEEIFESVGDR+0.000ELR+0.000	sp|P49257|LMAN1_HUMAN	3.37782e+06	0	17334248	0	16077905	42919264	0.000106883	FALSE
K+8.050SFK+8.050PDFGAESIYGGFLLGVR+9.038	tr|H0Y938|H0Y938_HUMAN;sp|P35606|COPB2_HUMAN;sp|P35606-2|COPB2_HUMAN	0	0	1.34313e+06	55974.8	2.47515e+06	7809743	0	FALSE
LM+15.995EPIYLVEIQC+57.021PEQVVGGIYGVLNR+1.994	sp|P13639|EF2_HUMAN	29283550	5221746	40698748	14469167	30371026	50455480	0	FALSE
AVTQALNR+0.000	sp|Q9Y490|TLN1_HUMAN	22585304	8.3814e+06	52948412	45161940	44246108	75537392	0	FALSE
LAQEGIYTLYPFINSR+9.038	sp|Q08J23|NSUN2_HUMAN;sp|Q08J23-2|NSUN2_HUMAN;sp|Q08J23-3|NSUN2_HUMAN	18295838	7497836	27503910	2.27491e+06	29784410	50341908	0	FALSE
STLEPVEK+11.051	tr|V9GZ37|V9GZ37_HUMAN;tr|A0A0G2JIW1|A0A0G2JIW1_HUMAN;sp|P0DMV9|HS71B_HUMAN;sp|P17066|HSP76_HUMAN;sp|P0DMV8|HS71A_HUMAN;sp|P0DMV8-2|HS71A_HUMAN;sp|P48741|HSP77_HUMAN	40659816	11588579	79549232	60725844	87927344	172972752	0.000394536	FALSE
K+8.050K+8.050DQVTAQEIFQDNHEDGPTAK+8.050	sp|P13010|XRCC5_HUMAN	27096324	10585571	55318524	6510475	48432276	116532152	0	FALSE
IGNTGGM+15.995LDNILASK+11.051	sp|P53396|ACLY_HUMAN;sp|P53396-2|ACLY_HUMAN;sp|P53396-3|ACLY_HUMAN	7.38994e+06	3.86106e+06	20046048	2.91132e+06	16801298	24863492	0	FALSE
LASPSGSTSSGLEVVAPEGTSAPGGGPGTLDDSATIC+57.021R+11.032	tr|M0R0K9|M0R0K9_HUMAN;sp|Q13263|TIF1B_HUMAN;sp|Q13263-2|TIF1B_HUMAN	14024239	4.04568e+06	22897244	4.85571e+06	22421478	44330044	0	FALSE
TPELNLDQFHDK+4.025TPYTIMFGPDK+4.025C+57.021GEDYK+4.025LHFIFR+3.988	tr|H0Y9H1|H0Y9H1_HUMAN;tr|D6RGY2|D6RGY2_HUMAN;tr|D6RFL1|D6RFL1_HUMAN;sp|P27824|CALX_HUMAN;sp|P27824-2|CALX_HUMAN;sp|P27824-3|CALX_HUMAN	172705	653632	2.28552e+06	0	1.91346e+06	3.49063e+06	0	FALSE
NYLLQC+57.021TR+0.000	sp|Q96QK1|VPS35_HUMAN	21360142	928456	29633710	26127014	28759648	39156624	0	FALSE
ASLEAAIADAEQR+0.000GELAIK+0.000DANAK+0.000LSELEAALQR+0.000	sp|P05787|K2C8_HUMAN;sp|P05787-2|K2C8_HUMAN	22505168	12898187	32336260	10836529	36076356	42917520	0.000541392	FALSE
HIADLAGNSEVILPVPAFNVINGGSHAGNK+11.051	tr|K7EM90|K7EM90_HUMAN;tr|A0A2R8Y6G6|A0A2R8Y6G6_HUMAN;tr|A0A2R8YEM5|A0A2R8YEM5_HUMAN;sp|P06733|ENOA_HUMAN;sp|P06733-2|ENOA_HUMAN	1.25622e+06	0	1.91316e+06	1.02433e+06	1257136	2.4727e+06	0.00025997	FALSE
SR+3.988K+4.025ESYSVYVYK+4.025	tr|U3KQK0|U3KQK0_HUMAN;sp|Q99877|H2B1N_HUMAN;sp|P57053|H2BFS_HUMAN;sp|P62807|H2B1C_HUMAN;sp|P58876|H2B1D_HUMAN;sp|Q5QNW6|H2B2F_HUMAN;sp|Q5QNW6-2|H2B2F_HUMAN;sp|O60814|H2B1K_HUMAN;sp|Q93079|H2B1H_HUMAN;sp|Q99880|H2B1L_HUMAN;sp|Q99879|H2B1M_HUMAN	3521314	1.79251e+06	7732483	5.66921e+06	7.62172e+06	20848190	0.000356979	FALSE
DLADELALVDVIEDK+11.051LK+11.051GEM+15.995MDLQHGSLFLR+11.032	tr|F5GXY2|F5GXY2_HUMAN;tr|F5GXH2|F5GXH2_HUMAN;tr|F5H5J4|F5H5J4_HUMAN;tr|F5GYU2|F5GYU2_HUMAN;tr|F5H6W8|F5H6W8_HUMAN;sp|P00338|LDHA_HUMAN;sp|P00338-2|LDHA_HUMAN;sp|P00338-3|LDHA_HUMAN;sp|P00338-4|LDHA_HUMAN;sp|P00338-5|LDHA_HUMAN	299159	0	873634	71551.1	896403	2.65109e+06	0	FALSE
LDSSPSVSSTLAAK+4.025DDPDGK+4.025QEAK+4.025PQQAAGMLSPK+4.025	tr|E7ETY2|E7ETY2_HUMAN;tr|A0A3B3IS06|A0A3B3IS06_HUMAN;tr|J3KQ96|J3KQ96_HUMAN;sp|Q13428|TCOF_HUMAN;sp|Q13428-2|TCOF_HUMAN;sp|Q13428-3|TCOF_HUMAN;sp|Q13428-4|TCOF_HUMAN;sp|Q13428-6|TCOF_HUMAN;sp|Q13428-7|TCOF_HUMAN;sp|Q13428-8|TCOF_HUMAN	8.06497e+06	6923258	19263586	0	14701895	25980708	0	FALSE
IEYDC+57.021ELVPR+0.000	sp|Q9P258|RCC2_HUMAN	0	13021612	65776864	0	49726356	107372560	0.00131068	FALSE
TK+11.051QFIDSNPNQPLVILEMESGASAK+11.051	sp|P49588|SYAC_HUMAN;sp|P49588-2|SYAC_HUMAN	7650898	2.97779e+06	15433141	1.78954e+06	13052493	20626382	0	FALSE
R+3.988IDEINK+4.025ELNQVMEQLGDAR+3.988	tr|G8JLG1|G8JLG1_HUMAN;sp|Q14683|SMC1A_HUMAN	2.29757e+06	1.85828e+06	6.3396e+06	887897	9638540	20269266	0	FALSE
ASFNHFDK+0.000DHGGALGPEEFK+0.000	tr|F5GXS2|F5GXS2_HUMAN;sp|O43707|ACTN4_HUMAN;sp|O43707-2|ACTN4_HUMAN;sp|O43707-3|ACTN4_HUMAN	49047824	18940312	110755232	16560385	105205712	191137376	0	FALSE
YSGR+9.038DSLIFLVDASK+8.050	sp|P12956|XRCC6_HUMAN;sp|P12956-2|XRCC6_HUMAN	5.73177e+06	5109024	27613982	1.10193e+06	14303359	29454212	0	FALSE
AALR+0.000DYETVVK+0.000	tr|A8MU39|A8MU39_HUMAN;tr|H0YDU8|H0YDU8_HUMAN;sp|P53041|PPP5_HUMAN	22656542	9949674	67155840	943119	68326376	134682848	0.00588511	FALSE
FSTQYR+0.000	tr|C9J6N9|C9J6N9_HUMAN;tr|C9IZG3|C9IZG3_HUMAN;sp|Q92890|UFD1_HUMAN;sp|Q92890-1|UFD1_HUMAN;sp|Q92890-3|UFD1_HUMAN	7260444	2.75336e+06	27865806	3579968	27476822	56528480	0.000394536	FALSE
GLDVEDVK+11.051FVINYDYPNSSEDYIHR+11.032	tr|J3KTA4|J3KTA4_HUMAN;sp|P17844|DDX5_HUMAN;sp|P17844-2|DDX5_HUMAN	3.78037e+06	0	2.97343e+06	1.71759e+06	5362119	11568937	0	FALSE
VSGGLEVLAEK+8.050C+57.021PNLTHLNLSGNK+8.050	tr|H0YN26|H0YN26_HUMAN;sp|P39687|AN32A_HUMAN	76052880	40898112	226494928	36604352	201531632	336426528	0	FALSE
GNFTLPEVAEC+57.021FDEITYVELQK+8.050EEAQK+8.050LLEQYK+8.050EESK+8.050	tr|A0A1W2PQL0|A0A1W2PQL0_HUMAN;tr|A0A1W2PQD4|A0A1W2PQD4_HUMAN;tr|A0A1W2PP34|A0A1W2PP34_HUMAN;tr|Q5RI18|Q5RI18_HUMAN;tr|A0A1W2PPH7|A0A1W2PPH7_HUMAN;tr|A0A1W2PP35|A0A1W2PP35_HUMAN;tr|A0A1W2PPL4|A0A1W2PPL4_HUMAN;tr|A0A1W2PPS1|A0A1W2PPS1_HUMAN;tr|A0A1X7SBS1|A0A1X7SBS1_HUMAN;sp|Q00839|HNRPU_HUMAN;sp|Q00839-2|HNRPU_HUMAN	18598082	9923055	72685584	2.9316e+06	69174624	140845200	0	FALSE
GVNC+57.021IDYYSGGDK+8.050PYLISGADDR+9.038LVK+8.050	sp|P35606|COPB2_HUMAN;sp|P35606-2|COPB2_HUMAN	605831	1.00865e+06	12093634	0	12521716	26858578	0	FALSE
WDVSTTK+8.050	tr|V9GYZ6|V9GYZ6_HUMAN;tr|V9GZ76|V9GZ76_HUMAN;sp|P07814|SYEP_HUMAN	36301780	9788054	61852140	7.49818e+06	70485112	112141552	0	FALSE
GVTIPYR+0.000PK+0.000PSSSPVIFAGGQDR+0.000	tr|H3BSS4|H3BSS4_HUMAN;sp|Q15366|PCBP2_HUMAN;sp|Q15366-2|PCBP2_HUMAN;sp|Q15366-3|PCBP2_HUMAN;sp|Q15366-6|PCBP2_HUMAN	48905904	21198766	103063608	6024522	41281804	177895488	0	FALSE
SVLEQTK+0.000	tr|A0A087WYC1|A0A087WYC1_HUMAN;tr|A0A087WTS8|A0A087WTS8_HUMAN;sp|P34932|HSP74_HUMAN	54999280	11896781	126514080	3.92166e+06	121023656	234124832	0.00435533	FALSE
LPLGFTFSFPC+57.021HQTK+11.051	tr|E9PB90|E9PB90_HUMAN;sp|P52789|HXK2_HUMAN	3277271	1.46121e+06	2.06051e+06	4855508	4.30515e+06	11030682	0.000677179	FALSE
VFDGIPPPYDK+4.025K+4.025	tr|Q8J015|Q8J015_HUMAN;tr|M0QYS1|M0QYS1_HUMAN;sp|Q6NVV1|R13P3_HUMAN;sp|P40429|RL13A_HUMAN	192819888	182222992	583700992	39635824	317019552	606140800	0	FALSE
GHEGPVWQVAWAHPMYGNILASC+57.021SYDR+11.032K+11.051	tr|E7ERC8|E7ERC8_HUMAN;tr|A8MXL6|A8MXL6_HUMAN;sp|P55735|SEC13_HUMAN;sp|P55735-2|SEC13_HUMAN;sp|P55735-3|SEC13_HUMAN;sp|P55735-4|SEC13_HUMAN	10610967	8384534	33404806	3.61297e+06	29691976	62260356	0	FALSE
INPYMSSPC+57.021HIEMILTEK+8.050EQIVPK+8.050PEEEVAQK+8.050	tr|J3QQT2|J3QQT2_HUMAN;tr|A0A087WXM6|A0A087WXM6_HUMAN;tr|A0A0A0MRF8|A0A0A0MRF8_HUMAN;tr|A0A0A6YYL6|A0A0A6YYL6_HUMAN;tr|J3QLC8|J3QLC8_HUMAN;tr|J3KRX5|J3KRX5_HUMAN;sp|P18621|RL17_HUMAN;sp|P18621-2|RL17_HUMAN;sp|P18621-3|RL17_HUMAN	92264624	54001984	214237008	42490692	174140480	334694912	0	FALSE
LIESAEELIR+0.000DGR+0.000	tr|X6R9L0|X6R9L0_HUMAN;sp|Q13217|DNJC3_HUMAN	13251816	12911912	20910346	1.29143e+06	16812808	37884880	0.00131068	FALSE
HFFLYGEFPGDER+9.038	tr|F5H8D7|F5H8D7_HUMAN;sp|P18887|XRCC1_HUMAN	3.93789e+06	1.15463e+06	8.28387e+06	0	9871357	12736948	0.00131068	FALSE
EATADDLIK+11.051	sp|Q16531|DDB1_HUMAN;sp|Q16531-2|DDB1_HUMAN	12769141	3.07875e+06	20109372	3139839	23429098	45225768	0.00025997	FALSE
NSPVEAVFSYLTGK+4.025R+3.988	tr|A0A3B3ITD8|A0A3B3ITD8_HUMAN;tr|H7C3P6|H7C3P6_HUMAN;sp|P52948|NUP98_HUMAN;sp|P52948-2|NUP98_HUMAN;sp|P52948-5|NUP98_HUMAN;sp|P52948-6|NUP98_HUMAN	7.55014e+06	2.762e+06	15147523	2.54713e+06	22557160	43049804	0	FALSE
NVQSVSIIDTELK+4.025	tr|H0YAL2|H0YAL2_HUMAN;sp|Q15645|PCH2_HUMAN;sp|Q15645-2|PCH2_HUMAN	23234034	9900757	50684456	3.78365e+06	45824160	86796232	0	FALSE
K+0.000EM+15.995ITM+15.995LHYDLLHHPYEPSGNK+0.000	sp|Q99459|CDC5L_HUMAN	6548890	5137899	18398136	6.48306e+06	16822328	35036744	0.000356979	FALSE
VAAALDDGSALGR+0.000	tr|A0A1W2PP80|A0A1W2PP80_HUMAN;tr|C9JGI3|C9JGI3_HUMAN;sp|P19971|TYPH_HUMAN;sp|P19971-2|TYPH_HUMAN	47643212	6.91682e+06	14660066	7826197	5647982	15218002	0	FALSE
AR+9.038DINAVLIDMER+9.038	tr|A0A3B3ITG9|A0A3B3ITG9_HUMAN;tr|H0YCK3|H0YCK3_HUMAN;tr|A0A3B3ISX1|A0A3B3ISX1_HUMAN;tr|A0A3B3IRQ9|A0A3B3IRQ9_HUMAN;sp|P55265|DSRAD_HUMAN;sp|P55265-2|DSRAD_HUMAN;sp|P55265-3|DSRAD_HUMAN;sp|P55265-4|DSRAD_HUMAN;sp|P55265-5|DSRAD_HUMAN	14811889	9658716	15467780	3.64312e+06	18705716	38665332	0	FALSE
K+11.051PYIWEYSR+11.032	tr|V9GYZ6|V9GYZ6_HUMAN;sp|P07814|SYEP_HUMAN	38941212	17524234	87831016	7.26228e+06	87861064	115080384	0	FALSE
VSGGLEVLAEK+0.000C+57.021PNLTHLNLSGNK+0.000	tr|H0YN26|H0YN26_HUMAN;sp|P39687|AN32A_HUMAN	37635372	11387167	60916416	13984825	46186300	78625384	0	FALSE
TPSIQPSLLPHAAPFAK+4.025	tr|H0YF36|H0YF36_HUMAN;tr|A0A0A0MSW3|A0A0A0MSW3_HUMAN;sp|P35658|NU214_HUMAN;sp|P35658-2|NU214_HUMAN;sp|P35658-3|NU214_HUMAN;sp|P35658-4|NU214_HUMAN;sp|P35658-5|NU214_HUMAN	8438438	17951258	10259589	5113116	16345508	35770800	0	FALSE
LQFIADHC+57.021PTLR+0.000VEALK+0.000	tr|C9JFE4|C9JFE4_HUMAN;tr|A8K070|A8K070_HUMAN;tr|A0A096LP07|A0A096LP07_HUMAN;tr|J3KRE8|J3KRE8_HUMAN;tr|J3KRJ4|J3KRJ4_HUMAN;tr|J3KTB0|J3KTB0_HUMAN;tr|J3QLE8|J3QLE8_HUMAN;tr|J3QS84|J3QS84_HUMAN;tr|J3KSA5|J3KSA5_HUMAN;tr|J3QLT0|J3QLT0_HUMAN;tr|J3QS88|J3QS88_HUMAN;tr|J3QL53|J3QL53_HUMAN;tr|A0A096LPJ3|A0A096LPJ3_HUMAN;sp|Q13098|CSN1_HUMAN;sp|Q13098-5|CSN1_HUMAN;sp|Q13098-7|CSN1_HUMAN	5.84697e+06	1.45427e+06	11919988	0	13627469	23292242	0.000394536	FALSE
YK+0.000ASQDPFPAAIILK+0.000	tr|E5RFX4|E5RFX4_HUMAN;sp|Q96KB5|TOPK_HUMAN;sp|Q96KB5-2|TOPK_HUMAN	11530094	2.98743e+06	31669936	2.06731e+06	33956700	71107512	0	FALSE
TEM+15.995ENEFVLIK+8.050K+8.050	tr|F8VP67|F8VP67_HUMAN;tr|F8VUG2|F8VUG2_HUMAN;tr|F8W1U3|F8W1U3_HUMAN;sp|P05787|K2C8_HUMAN;sp|P05787-2|K2C8_HUMAN	5118003	3827191	12915497	4.21868e+06	49032092	42033252	0	FALSE
IVSGK+8.050DYNVTANSK+8.050	tr|F5GXY2|F5GXY2_HUMAN;tr|F5GXH2|F5GXH2_HUMAN;tr|F5GYU2|F5GYU2_HUMAN;sp|P00338|LDHA_HUMAN;sp|P00338-2|LDHA_HUMAN;sp|P00338-3|LDHA_HUMAN;sp|P00338-5|LDHA_HUMAN	31199840	24478578	49591564	20028554	13681248	48685508	0.000209315	FALSE
NK+4.025TEDLEATSEHFK+4.025	tr|C9JXZ5|C9JXZ5_HUMAN;sp|Q9BV40|VAMP8_HUMAN	30623010	1.27911e+06	14338644	3.8553e+06	14151658	33005718	0.000725233	FALSE
ILDEIEEHNIK+4.025	tr|B5MCX3|B5MCX3_HUMAN;tr|H7C2Y0|H7C2Y0_HUMAN;tr|C9J2Q4|C9J2Q4_HUMAN;sp|Q15019|SEPT2_HUMAN;sp|Q15019-2|SEPT2_HUMAN;sp|Q15019-3|SEPT2_HUMAN	27690888	10141573	56025892	6425816	55063400	100222264	0	FALSE
STVEELHEPIPSLFR+9.038	tr|J3QS03|J3QS03_HUMAN;sp|Q9GZX9|TWSG1_HUMAN	4537453	627341	3.09705e+06	0	7.30381e+06	19386804	0	FALSE
DISTNYYASQK+1.994K+1.994	tr|H0YIV0|H0YIV0_HUMAN;sp|P14625|ENPL_HUMAN	23950310	14931037	78181432	5971974	59020832	116203096	0	FALSE
IFSGSSHQDLSQK+0.000	tr|Q15244|Q15244_HUMAN;tr|A0A2R8Y7H4|A0A2R8Y7H4_HUMAN;tr|B1ALA9|B1ALA9_HUMAN;tr|B1ALA7|B1ALA7_HUMAN;tr|A0A0B4J207|A0A0B4J207_HUMAN;sp|P60891|PRPS1_HUMAN;sp|P21108|PRPS3_HUMAN	19194236	3.22261e+06	37083024	4.16986e+06	34266112	71987344	0	FALSE
AR+11.032PFPDGLAEDIDK+11.051GEVSAR+11.032QELK+11.051	sp|P13639|EF2_HUMAN	30232950	13012365	56833176	10510902	60339580	132883128	0.000394536	FALSE
NVSEELDR+1.994TPPEVSK+1.994	sp|Q15393|SF3B3_HUMAN;sp|Q15393-3|SF3B3_HUMAN	58488680	26364428	111879312	12526050	134775520	310191520	0	FALSE
ITHQIVDR+0.000PGQQTSVIGR+0.000	tr|B3KXD6|B3KXD6_HUMAN;tr|B5MCF9|B5MCF9_HUMAN;sp|O00541|PESC_HUMAN;sp|O00541-2|PESC_HUMAN	1.08045e+06	775038	1.46455e+06	0	4366861	4.09112e+06	0	FALSE
IEVEK+4.025PFAIAK+4.025E	sp|P23284|PPIB_HUMAN	20001278	2885126	66659840	5.18118e+06	67039232	136423952	0	FALSE
IFQMNEER+11.032	tr|G3V599|G3V599_HUMAN;sp|Q96PC5|MIA2_HUMAN;sp|Q96PC5-5|MIA2_HUMAN;sp|Q96PC5-6|MIA2_HUMAN;sp|Q96PC5-7|MIA2_HUMAN;sp|Q96PC5-8|MIA2_HUMAN;sp|Q96PC5-9|MIA2_HUMAN;sp|Q96PC5-10|MIA2_HUMAN;sp|Q96PC5-11|MIA2_HUMAN;sp|Q96PC5-12|MIA2_HUMAN;sp|Q96PC5-13|MIA2_HUMAN;sp|Q96PC5-14|MIA2_HUMAN	3320790	9687796	1.48707e+06	8489856	423785	39226516	0	FALSE
FAQFFLC+57.021PLFDESC+57.021K+4.025DR+3.988EVNAVDSEHEK+4.025	tr|A0A3B3ISG5|A0A3B3ISG5_HUMAN;tr|Q5T5N3|Q5T5N3_HUMAN;sp|P14735|IDE_HUMAN	3570580	2.0334e+06	5560303	2350880	3.79546e+06	8624476	0.000585995	FALSE
GAHNGQGLGNAFLSHISAC+57.021DGIFHLTR+11.032	tr|J3KQ32|J3KQ32_HUMAN;sp|Q9NTK5|OLA1_HUMAN;sp|Q9NTK5-3|OLA1_HUMAN	18056454	5.29055e+06	27990574	14317190	2.38245e+06	67717256	0.000394536	FALSE
TGIYEEK+0.000	tr|H0Y9H1|H0Y9H1_HUMAN;tr|D6RGY2|D6RGY2_HUMAN;tr|D6RFL1|D6RFL1_HUMAN;sp|P27824|CALX_HUMAN;sp|P27824-2|CALX_HUMAN;sp|P27824-3|CALX_HUMAN	3.5056e+06	1.16166e+06	6.26224e+06	1.46203e+06	9639225	17249920	0.000631958	FALSE
K+0.000GLILK+0.000DHGIR+0.000	tr|H0YDN1|H0YDN1_HUMAN;sp|Q15149|PLEC_HUMAN;sp|Q15149-2|PLEC_HUMAN;sp|Q15149-3|PLEC_HUMAN;sp|Q15149-4|PLEC_HUMAN;sp|Q15149-5|PLEC_HUMAN;sp|Q15149-6|PLEC_HUMAN;sp|Q15149-7|PLEC_HUMAN;sp|Q15149-8|PLEC_HUMAN;sp|Q15149-9|PLEC_HUMAN	2.6468e+06	620218	4350412	964693	6.20247e+06	13003480	0.000356979	FALSE
VTGALQFGELQK+11.051	sp|Q6UVK1|CSPG4_HUMAN	13712985	3.08852e+06	25284944	642526	20588414	34709916	0	FALSE
YFDGNLEK+0.000	sp|Q9Y4X5|ARI1_HUMAN	14980193	2512590	18133770	2.12266e+06	11436204	14655497	0	FALSE
AFAISGPFNVQFLVK+0.000	sp|P31327|CPSM_HUMAN;sp|P31327-2|CPSM_HUMAN;sp|P31327-3|CPSM_HUMAN	11721316	2610237	16360716	0	12471944	6.30109e+06	0	FALSE
VIQPHGGGSNPLEGTQHLQDVPYVMVR+9.038	sp|Q14126|DSG2_HUMAN	34228464	9437697	60822132	15581878	51049616	111596824	0.00169787	FALSE
TGPFGSAGAK+4.025GPLGPSGPPGIPGPAGPIGPSGR+3.988	XXX_tr|Q49AM6|Q49AM6_HUMAN;XXX_sp|P29400|CO4A5_HUMAN;XXX_sp|P29400-2|CO4A5_HUMAN	0	0	18036968	0	461227	0	0.00381762	TRUE
LNHLVDSLQQLR+0.000	tr|A0A0A0MSW3|A0A0A0MSW3_HUMAN;sp|P35658|NU214_HUMAN;sp|P35658-2|NU214_HUMAN;sp|P35658-3|NU214_HUMAN;sp|P35658-4|NU214_HUMAN;sp|P35658-5|NU214_HUMAN	6.16715e+06	1556148	12702857	818010	12389880	26357974	0	FALSE
IC+57.021C+57.021QFDFK+4.025	tr|A0A0C4DGL1|A0A0C4DGL1_HUMAN;tr|H0YLB9|H0YLB9_HUMAN;tr|H0YNG5|H0YNG5_HUMAN;sp|Q16706|MA2A1_HUMAN;sp|P49641|MA2A2_HUMAN;sp|P49641-1|MA2A2_HUMAN;sp|P49641-2|MA2A2_HUMAN	3.49845e+06	2.21351e+06	8139348	3.29377e+06	11639942	25061298	0	FALSE
SQTFLEK+0.000	tr|H0Y4R4|H0Y4R4_HUMAN;tr|J3KN66|J3KN66_HUMAN;tr|A0A0A0MSK5|A0A0A0MSK5_HUMAN;sp|Q5JTV8|TOIP1_HUMAN;sp|Q5JTV8-3|TOIP1_HUMAN	16093110	8895562	21977670	3.01491e+06	11078359	47931652	0.000394536	FALSE
YIK+0.000DK+0.000YPNLQVIGGNVVTAAQAK+0.000	tr|H0Y4R1|H0Y4R1_HUMAN;sp|P12268|IMDH2_HUMAN	28959326	15449981	64222632	8743069	58855684	115078232	0.000829187	FALSE
SGGGIVEPIPLNIK+0.000	sp|Q8N954|GPT11_HUMAN	3.15786e+06	835117	5.46642e+06	1.41588e+06	11655677	25730742	0	FALSE
VAQEK+0.000DQLQEQLQALK+0.000ESLK+0.000	tr|F5H4J1|F5H4J1_HUMAN;tr|A0A087WY61|A0A087WY61_HUMAN;sp|Q14980|NUMA1_HUMAN;sp|Q14980-2|NUMA1_HUMAN;sp|Q14980-3|NUMA1_HUMAN;sp|Q14980-4|NUMA1_HUMAN	5111244	2.06195e+06	0	758130	16138559	23214170	0	FALSE
GGNLR+3.988DK+4.025LDGNELDLSLSDLNEVPVK+4.025ELAALPK+4.025	sp|Q96AG4|LRC59_HUMAN	82313056	34960952	191789920	21915994	174629600	328596192	0.00797367	FALSE
IPNFWVTTFVNHPQVSALLGEEDEEALHYLTR+9.038	tr|A0A0C4DFV9|A0A0C4DFV9_HUMAN;sp|Q01105|SET_HUMAN;sp|Q01105-2|SET_HUMAN;sp|Q01105-3|SET_HUMAN;sp|Q01105-4|SET_HUMAN	48971076	13030485	91048472	44009944	66332124	157688832	0.000818685	FALSE
FLEVIK+0.000PFC+57.021VILPEIQK+0.000PER+0.000	tr|B4DR61|B4DR61_HUMAN;sp|P61619|S61A1_HUMAN	15838710	3.63759e+06	37698896	4.72572e+06	32945852	81477400	0	FALSE
GAQGPAGPAGPPGLIGEQGISGPR+3.988	tr|E7ENL6|E7ENL6_HUMAN;sp|P12111|CO6A3_HUMAN;sp|P12111-2|CO6A3_HUMAN;sp|P12111-4|CO6A3_HUMAN	1.76759e+06	53728456	46671028	136474080	65280692	129600112	0.00712529	FALSE
TAFDEAIAELDTLNEDSYK+11.051DSTLIMQLLR+11.032	sp|P27348|1433T_HUMAN	13560298	6028409	29455020	0	23797246	52444764	0	FALSE
TFYEK+6.020R+7.044	tr|A2A3R7|A2A3R7_HUMAN;sp|P62753|RS6_HUMAN	65726788	35083792	189198032	12719903	139781072	274584096	0.000209315	FALSE
M+15.995VPAGMGAGLER+3.988	tr|A0A087X0X3|A0A087X0X3_HUMAN;tr|M0QZM1|M0QZM1_HUMAN;tr|M0R2I7|M0R2I7_HUMAN;sp|P52272|HNRPM_HUMAN;sp|P52272-2|HNRPM_HUMAN	11510274	2.83167e+06	16053503	2.05527e+06	16514834	44590464	0	FALSE
ALK+4.025LPSTGEGTQFYLFENVDNAQQFK+4.025	tr|A0A087WT44|A0A087WT44_HUMAN;tr|I3L159|I3L159_HUMAN;tr|I3L1F5|I3L1F5_HUMAN;sp|P30519|HMOX2_HUMAN;sp|P30519-2|HMOX2_HUMAN	1.20974e+06	256449	3231425	0	3.39524e+06	4972347	0	FALSE
HLGSLGAAGSSDESK+11.051EAER+11.032K+11.051	XXX_sp|Q86U86|PB1_HUMAN;XXX_sp|Q86U86-2|PB1_HUMAN;XXX_sp|Q86U86-3|PB1_HUMAN;XXX_sp|Q86U86-4|PB1_HUMAN;XXX_sp|Q86U86-5|PB1_HUMAN;XXX_sp|Q86U86-7|PB1_HUMAN;XXX_sp|Q86U86-8|PB1_HUMAN;XXX_sp|Q86U86-9|PB1_HUMAN	13745721	0	72709824	0	0	6.25328e+06	0.00850705	TRUE
INPYM+15.995SSPC+57.021HIEMILTEK+4.025EQIVPK+4.025PEEEVAQK+4.025	tr|J3QQT2|J3QQT2_HUMAN;tr|A0A087WXM6|A0A087WXM6_HUMAN;tr|A0A0A0MRF8|A0A0A0MRF8_HUMAN;tr|A0A0A6YYL6|A0A0A6YYL6_HUMAN;tr|J3QLC8|J3QLC8_HUMAN;tr|J3KRX5|J3KRX5_HUMAN;sp|P18621|RL17_HUMAN;sp|P18621-2|RL17_HUMAN;sp|P18621-3|RL17_HUMAN	29465014	12725323	78275488	9912070	61396468	111897808	0.000106883	FALSE
IPSDTFYDHEDTTTDK+8.050LK+8.050	sp|Q14118|DAG1_HUMAN	8721040	5.60684e+06	15584387	1.6208e+06	11557067	37520692	0	FALSE
AVELAANTK+11.051	tr|A0A0B4J1R6|A0A0B4J1R6_HUMAN;sp|P29401|TKT_HUMAN;sp|P29401-2|TKT_HUMAN	364017312	106958936	790725248	68309184	680435392	1324850048	0	FALSE
LK+0.000GIEEEEILPGFILC+57.021DPNNLC+57.021HSGR+0.000	tr|H3BR35|H3BR35_HUMAN;sp|P15170|ERF3A_HUMAN;sp|P15170-2|ERF3A_HUMAN;sp|P15170-3|ERF3A_HUMAN	124189200	77289360	328095680	38177836	287078048	519841984	0	FALSE
MK+1.994EIAEAYLGYPVTNAVITVPAYFNDSQR+1.994	tr|A0A0G2JIW1|A0A0G2JIW1_HUMAN;sp|P0DMV9|HS71B_HUMAN;sp|P0DMV8|HS71A_HUMAN	11118821	11805692	27306350	3.69259e+06	32456516	63838180	0	FALSE
NLLESYHVPELIK+8.050DAHLLVESK+8.050	sp|P42704|LPPRC_HUMAN	42152624	20172972	102217784	17559716	98021368	155461568	0	FALSE
DVVQAYPEVR+11.032	sp|Q08211|DHX9_HUMAN	39870916	11969792	81146256	35556560	74685680	105637240	0	FALSE
IVEMSTSK+8.050	tr|I3L397|I3L397_HUMAN;tr|C9J4W5|C9J4W5_HUMAN;tr|F8WCJ1|F8WCJ1_HUMAN;tr|C9J7B5|C9J7B5_HUMAN;tr|I3L504|I3L504_HUMAN;sp|P63241|IF5A1_HUMAN;sp|P63241-2|IF5A1_HUMAN;sp|Q9GZV4|IF5A2_HUMAN	623935744	191171600	1346168064	77636440	818082624	1449768960	0	FALSE
FSDHVALLSVFQAWDDAR+0.000	sp|Q08211|DHX9_HUMAN	21219300	48651048	15660486	78246144	60591488	80913856	0	FALSE
PGLVDSNPAPPESQEK+4.025K+4.025PLK+4.025PC+57.021C+57.021AC+57.021PETK+4.025	tr|C9J8T6|C9J8T6_HUMAN;sp|Q14061|COX17_HUMAN	9570869	0	5150620	0	12104404	27538258	0	FALSE
AQGPAASAEEPK+0.000PVEAPAANSDQTVTVK+0.000E	sp|P80723|BASP1_HUMAN;sp|P80723-2|BASP1_HUMAN	36712196	12574677	12150759	7996964	6.15446e+06	8743641	0	FALSE
TSIIATISPASLNLEETLSTLEYAHR+11.032	sp|P52732|KIF11_HUMAN	2098458	1.13391e+06	3970770	84686.2	9918185	26506936	0	FALSE
IDNSQVESGSLEDDWDFLPPK+11.051	tr|K7EJB9|K7EJB9_HUMAN;sp|P27797|CALR_HUMAN	23102822	0	38384912	17499928	51658784	64838860	0	FALSE
K+0.000VAEPELMGTPDGTC+57.021YPPPPVPR+0.000	tr|H7BZB3|H7BZB3_HUMAN;tr|F8VPD4|F8VPD4_HUMAN;sp|P27708|PYR1_HUMAN	14032738	12857015	18958852	3.18127e+06	10972524	15378212	0	FALSE
DEFEGLFK+0.000QPAENVNQYLTDPK+0.000	tr|Q5JRR6|Q5JRR6_HUMAN;sp|P22314|UBA1_HUMAN;sp|P22314-2|UBA1_HUMAN	1.16178e+06	0	0	0	776473	1.56285e+06	0	FALSE
STELLIR+0.000	tr|Q5TEC6|Q5TEC6_HUMAN;tr|K7EK07|K7EK07_HUMAN;tr|K7EP01|K7EP01_HUMAN;tr|K7EMV3|K7EMV3_HUMAN;tr|K7ES00|K7ES00_HUMAN;tr|B4DEB1|B4DEB1_HUMAN;sp|Q71DI3|H32_HUMAN;sp|Q6NXT2|H3C_HUMAN;sp|Q16695|H31T_HUMAN;sp|P68431|H31_HUMAN;sp|P84243|H33_HUMAN	9652898	8.36471e+06	7.83648e+06	5411581	7217548	15445301	0.000829187	FALSE
TETQEK+4.025NPLPSK+4.025ETIEQEK+4.025	sp|P62328|TYB4_HUMAN	33976476	8454992	66704764	4416731	71511304	134133744	0	FALSE
LQPIALSC+57.021VLNIGAC+57.021K+11.051	sp|Q08752|PPID_HUMAN	0	4473008	8500421	1.97565e+06	6.63987e+06	4.19487e+06	0.00148208	FALSE
AELDDTPMR+11.032	sp|P23246|SFPQ_HUMAN;sp|P23246-2|SFPQ_HUMAN	16635491	6087422	34807784	980328	41428664	106459352	0	FALSE
TALTTTISSR+11.032	sp|Q9BV20|MTNA_HUMAN;sp|Q9BV20-2|MTNA_HUMAN	31995196	5.50249e+06	49810352	0	49519884	98199312	0	FALSE
GTGGVDTAAVGGVFDVSNADR+1.994	tr|H0YJG0|H0YJG0_HUMAN;sp|P12277|KCRB_HUMAN	16723877	7.21839e+06	35687192	10059092	23560994	44366636	0	FALSE
LIDTVK+11.051DPVSK+11.051	tr|H3BSA1|H3BSA1_HUMAN;tr|H3BNI9|H3BNI9_HUMAN;sp|P19784|CSK22_HUMAN	11360851	4.86161e+06	41474828	11108412	32965306	54770168	0	FALSE
ALSAIADLLTNEHER+1.994	tr|C9JZR2|C9JZR2_HUMAN;sp|O60716|CTND1_HUMAN;sp|O60716-2|CTND1_HUMAN;sp|O60716-3|CTND1_HUMAN;sp|O60716-4|CTND1_HUMAN;sp|O60716-5|CTND1_HUMAN;sp|O60716-6|CTND1_HUMAN;sp|O60716-7|CTND1_HUMAN;sp|O60716-8|CTND1_HUMAN;sp|O60716-9|CTND1_HUMAN;sp|O60716-10|CTND1_HUMAN;sp|O60716-11|CTND1_HUMAN;sp|O60716-12|CTND1_HUMAN;sp|O60716-13|CTND1_HUMAN;sp|O60716-14|CTND1_HUMAN;sp|O60716-15|CTND1_HUMAN;sp|O60716-16…	11037691	10274276	40240940	891745	57593760	113235112	0	FALSE
VIDPATATSVDLR+9.038DIK+8.050	sp|P50991|TCPD_HUMAN;sp|P50991-2|TCPD_HUMAN	28501640	7458425	23968352	3.35814e+06	27187292	64543024	0	FALSE
R+3.988IPIHNEDITYDELVLMMQR+3.988	tr|C9JTY3|C9JTY3_HUMAN;tr|C9JUE0|C9JUE0_HUMAN;tr|C9JJP5|C9JJP5_HUMAN;sp|Q92734|TFG_HUMAN;sp|Q92734-2|TFG_HUMAN;sp|Q92734-3|TFG_HUMAN;sp|Q92734-4|TFG_HUMAN	4.55596e+06	5516204	7223137	1.5004e+06	11725723	24378056	0	FALSE
NLLESYHVPELIK+11.051DAHLLVESK+11.051	sp|P42704|LPPRC_HUMAN	9765078	5.13486e+06	25411756	3685411	23290258	42772272	0	FALSE
GAEEMETVIPVDVMR+0.000	tr|K7ELW0|K7ELW0_HUMAN;sp|Q99497|PARK7_HUMAN	77197384	26514972	171022896	9270755	157993968	244640960	0	FALSE
NVPAAR+0.000EPEVLSTMAIIVNK+0.000	sp|O14980|XPO1_HUMAN	23722776	8993855	42149076	3.36776e+06	53367488	82033528	0	FALSE
LPVITC+57.021YADAK+0.000PGLQTHGFIIR+0.000	tr|A0A3B3IUD7|A0A3B3IUD7_HUMAN;sp|Q14690|RRP5_HUMAN	6422466	5.08972e+06	19693040	1.22271e+06	20957162	32067928	0	FALSE
VLLSLEHGLWAPNLHFHSPNPEIPALLDGR+3.988	tr|A0A0U1RQF0|A0A0U1RQF0_HUMAN;sp|P49327|FAS_HUMAN	12302671	1.70386e+06	20859016	9296726	15003516	24987684	0.00564103	FALSE
LYSILGTTLK+8.050DEGK+8.050	sp|O75083|WDR1_HUMAN;sp|O75083-3|WDR1_HUMAN	66647792	14332740	133494824	12527781	96831896	199499184	0	FALSE
SINSILDYISTSK+11.051	tr|B4DIH5|B4DIH5_HUMAN;tr|H0YM03|H0YM03_HUMAN;tr|H0YKU5|H0YKU5_HUMAN;sp|P61201|CSN2_HUMAN;sp|P61201-2|CSN2_HUMAN	16709938	5.75158e+06	34860076	3713871	35418496	63809052	0	FALSE
DLPELALDTPR+7.044APQLVGQFIAR+7.044	sp|Q53EL6|PDCD4_HUMAN;sp|Q53EL6-2|PDCD4_HUMAN	30718818	12625411	66424640	7904194	58434700	68768904	0	FALSE
DINAYNC+57.021EEPTEK+11.051LPFPIIDDR+11.032	sp|P30041|PRDX6_HUMAN	6.31302e+06	8811739	16871504	3.20263e+06	14644019	27496552	0	FALSE
EPFTLEAYYSSPQDLPYPDPAIAQFSVQK+11.051	tr|A0A087WYC1|A0A087WYC1_HUMAN;sp|P34932|HSP74_HUMAN	3.20195e+06	0	7853333	1.03237e+06	5.21558e+06	9600396	0.000829187	FALSE
IQGLTVEQAEAVVR+11.032	tr|A0A2R8Y5T0|A0A2R8Y5T0_HUMAN;tr|A0A2R8Y542|A0A2R8Y542_HUMAN;tr|A0A2R8Y706|A0A2R8Y706_HUMAN;sp|Q14204|DYHC1_HUMAN	12499515	0	26839112	734411	31305708	54024136	0	FALSE
VVLDDK+0.000DYFLFR+0.000DGDILGK+0.000	tr|B8ZZ54|B8ZZ54_HUMAN;sp|P61604|CH10_HUMAN	64003572	24530338	88585128	18662996	182797328	367707136	0	FALSE
ADTQTYQPYNK+4.025DWIK+4.025	sp|P84090|ERH_HUMAN	89602704	35829320	197693024	35120632	209173152	359956352	0	FALSE
DNNLLGR+0.000	tr|V9GZ37|V9GZ37_HUMAN;tr|A0A0G2JIW1|A0A0G2JIW1_HUMAN;tr|Q53FA3|Q53FA3_HUMAN;sp|P0DMV9|HS71B_HUMAN;sp|P17066|HSP76_HUMAN;sp|P34931|HS71L_HUMAN;sp|P0DMV8|HS71A_HUMAN;sp|P0DMV8-2|HS71A_HUMAN	757116	18170188	90716760	2.31701e+06	79122488	183632944	0	FALSE
LGLSTLGELK+4.025QNLSR+3.988	tr|A0A087WZ51|A0A087WZ51_HUMAN;tr|A0A087WYR3|A0A087WYR3_HUMAN;sp|O43399|TPD54_HUMAN;sp|O43399-2|TPD54_HUMAN;sp|O43399-3|TPD54_HUMAN;sp|O43399-4|TPD54_HUMAN;sp|O43399-5|TPD54_HUMAN;sp|O43399-6|TPD54_HUMAN;sp|O43399-7|TPD54_HUMAN	37548248	21342372	109009568	7071365	98230096	192115280	0	FALSE
IIALDGDTK+11.051	tr|A0A0B4J1R6|A0A0B4J1R6_HUMAN;sp|P29401|TKT_HUMAN;sp|P29401-2|TKT_HUMAN	8.3711e+06	3.51371e+06	22548366	20102444	12432291	10162519	0.00293757	FALSE
DFDPVHGDVIK+11.051	sp|P07948|LYN_HUMAN;sp|P07948-2|LYN_HUMAN	690739	779558	0	3.81458e+06	5.30682e+06	13968752	0.000356979	FALSE
ADVIQATGDAIC+57.021IFR+3.988	tr|E9PMD4|E9PMD4_HUMAN;sp|Q08945|SSRP1_HUMAN	12231038	7.06862e+06	28085784	3.28737e+06	25295978	43452404	0	FALSE
NAQLDC+57.021SK+0.000LETLGIGQR+0.000	sp|Q9NZL9|MAT2B_HUMAN;sp|Q9NZL9-2|MAT2B_HUMAN	10656849	4.5777e+06	24850406	8.04599e+06	28150058	47311696	0	FALSE
VLQK+8.050LDDDGLPFIGAK+8.050	tr|H7C0D9|H7C0D9_HUMAN;sp|Q9H9Y6|RPA2_HUMAN;sp|Q9H9Y6-2|RPA2_HUMAN;sp|Q9H9Y6-3|RPA2_HUMAN;sp|Q9H9Y6-4|RPA2_HUMAN;sp|Q9H9Y6-5|RPA2_HUMAN	9479868	8.28619e+06	21076126	1.86631e+06	30649282	57210024	0	FALSE
SNQQNLGTIK+11.051	tr|E9PL69|E9PL69_HUMAN;sp|P23921|RIR1_HUMAN	4.70173e+06	7.91522e+06	30302592	1.57143e+06	25583102	56008584	0	FALSE
MK+8.050EIAEAYLGYPVTNAVITVPAYFNDSQR+9.038	tr|A0A0G2JIW1|A0A0G2JIW1_HUMAN;sp|P0DMV9|HS71B_HUMAN;sp|P0DMV8|HS71A_HUMAN	1.7063e+06	562274	5.90316e+06	2.96912e+06	10542305	21025772	0	FALSE
FSGWYDADLSPAGHEEAK+11.051R+11.032	sp|P18669|PGAM1_HUMAN	3.95049e+06	1.46355e+06	6.69044e+06	625054	3638825	10757278	0.000394536	FALSE
TLWNWK+0.000	XXX_tr|A0A0A0MSJ0|A0A0A0MSJ0_HUMAN;XXX_sp|Q86XP3|DDX42_HUMAN;XXX_sp|Q86XP3-2|DDX42_HUMAN	35098520	6268529	76509712	2.96908e+06	70700136	142947040	0.00015971	TRUE
ELSANTAAFAK+1.994	sp|O60749|SNX2_HUMAN;sp|O60749-2|SNX2_HUMAN	14425249	6.39593e+06	34901980	4.20144e+06	33607212	73740944	0	FALSE
MK+8.050EIAEAYLGYPVTNAVITVPAYFNDSQR+9.038	tr|A0A0G2JIW1|A0A0G2JIW1_HUMAN;sp|P0DMV9|HS71B_HUMAN;sp|P0DMV8|HS71A_HUMAN	24590052	21893894	54343384	8913197	65065396	145440240	0	FALSE
YLLTQELLQGGEVHR+11.032	sp|Q92508|PIEZ1_HUMAN	5.95235e+06	2.61701e+06	12059744	1.13399e+06	9566906	21109586	0	FALSE
SGK+11.051TELAEPIAIR+11.032PTSETVM+15.995YPAYAK+11.051	sp|P07814|SYEP_HUMAN	7.05678e+06	4648724	20728574	0	20903452	31442920	0	FALSE
FIAHVPVPSQQEIEEALVR+9.038	sp|Q9ULR0|ISY1_HUMAN;sp|Q9ULR0-1|ISY1_HUMAN;sp|Q9ULR0-2|ISY1_HUMAN	23741466	20239380	15179091	169557	24574562	23534136	0	FALSE
FFQPTEMAAQDFFQR+9.038	sp|O95782|AP2A1_HUMAN;sp|O95782-2|AP2A1_HUMAN	4961328	1.48004e+06	12893981	0	13861395	21645620	0	FALSE
DLADELALVDVIEDK+8.050LK+8.050GEMM+15.995DLQHGSLFLR+9.038	tr|F5GXY2|F5GXY2_HUMAN;tr|F5GXH2|F5GXH2_HUMAN;tr|F5H5J4|F5H5J4_HUMAN;tr|F5GYU2|F5GYU2_HUMAN;tr|F5H6W8|F5H6W8_HUMAN;sp|P00338|LDHA_HUMAN;sp|P00338-2|LDHA_HUMAN;sp|P00338-3|LDHA_HUMAN;sp|P00338-4|LDHA_HUMAN;sp|P00338-5|LDHA_HUMAN	2.77014e+06	1.8128e+06	10666895	2.2807e+06	5806587	5635975	0	FALSE
DLADELALVDVIEDK+8.050LK+8.050GEM+15.995MDLQHGSLFLR+9.038	tr|F5GXY2|F5GXY2_HUMAN;tr|F5GXH2|F5GXH2_HUMAN;tr|F5H5J4|F5H5J4_HUMAN;tr|F5GYU2|F5GYU2_HUMAN;tr|F5H6W8|F5H6W8_HUMAN;sp|P00338|LDHA_HUMAN;sp|P00338-2|LDHA_HUMAN;sp|P00338-3|LDHA_HUMAN;sp|P00338-4|LDHA_HUMAN;sp|P00338-5|LDHA_HUMAN	2.77014e+06	1.8128e+06	10666895	2.2807e+06	5806587	5635975	0	FALSE
R+0.000ISGLIYEETR+0.000	sp|P62805|H4_HUMAN	5.43e+06	2.70634e+06	7.37364e+06	8477160	14400937	20547002	0	FALSE
AVAGDASESALLK+8.050	sp|P05023|AT1A1_HUMAN;sp|P05023-2|AT1A1_HUMAN;sp|P05023-3|AT1A1_HUMAN;sp|P05023-4|AT1A1_HUMAN	89882200	25957766	183734208	31879350	223548544	393955264	0	FALSE
AMTGVEQWPYR+9.038	tr|B4DUR8|B4DUR8_HUMAN;sp|P49368|TCPG_HUMAN;sp|P49368-2|TCPG_HUMAN	11481589	1.16082e+06	25569664	0	23455494	42906720	0	FALSE
IFQK+11.051GESPVDYDGGR+11.032	sp|Q15084|PDIA6_HUMAN;sp|Q15084-2|PDIA6_HUMAN;sp|Q15084-3|PDIA6_HUMAN;sp|Q15084-4|PDIA6_HUMAN;sp|Q15084-5|PDIA6_HUMAN	16109821	4398617	7.22397e+06	23373158	9102896	14783329	0	FALSE
K+0.000GEK+0.000DIPGLTDTTVPR+0.000	tr|A2A3R5|A2A3R5_HUMAN;sp|P62753|RS6_HUMAN	54642500	22479984	99912984	10789289	77067520	165401488	0	FALSE
R+11.032VFIM+15.995DNC+57.021EELIPEYLNFIR+11.032	sp|P07900|HS90A_HUMAN;sp|P07900-2|HS90A_HUMAN	2242.61	738762	1.10258e+06	1.54825e+06	1.46273e+06	4198152	0.000394536	FALSE
M+15.995LPTIIADNAGYDSADLVAQLR+11.032	tr|F5GWF6|F5GWF6_HUMAN;sp|P78371|TCPB_HUMAN;sp|P78371-2|TCPB_HUMAN	11845080	2163328	4257721	3593303	0	13826405	0.000829187	FALSE
LVQSPNSYFMDVK+4.025	tr|H0YMV8|H0YMV8_HUMAN;tr|C9JLI6|C9JLI6_HUMAN;sp|P42677|RS27_HUMAN;sp|Q71UM5|RS27L_HUMAN	6.81215e+06	15767687	17874620	16442425	12915196	5411811	0.00109305	FALSE
TPDGQGLSTYK+4.025ELC+57.021SLASDLSQPDLVYK+4.025	tr|J3KN16|J3KN16_HUMAN;sp|Q5VYK3|ECM29_HUMAN	29306656	17746034	28272962	16554470	25691886	37919224	0	FALSE
HWPFMVVNDAGR+9.038PK+8.050	tr|E9PN25|E9PN25_HUMAN;tr|E9PKE3|E9PKE3_HUMAN;tr|E9PNE6|E9PNE6_HUMAN;tr|E9PQQ4|E9PQQ4_HUMAN;tr|E9PLF4|E9PLF4_HUMAN;tr|E9PN89|E9PN89_HUMAN;tr|E9PPY6|E9PPY6_HUMAN;tr|E9PK54|E9PK54_HUMAN;tr|E9PQK7|E9PQK7_HUMAN;sp|P11142|HSP7C_HUMAN;sp|P11142-2|HSP7C_HUMAN	6.10443e+06	3906122	22030116	1152199	24296264	58296444	0	FALSE
ITSPLMEPSSIEK+8.050	sp|P28066|PSA5_HUMAN	138927472	44296392	236863376	76802112	249362656	491852544	0	FALSE
GR+0.000APQVLVLAPTR+0.000	sp|Q9NR30|DDX21_HUMAN;sp|Q9NR30-2|DDX21_HUMAN	29164578	11756206	54439852	5200144	59905508	117815640	0	FALSE
AR+0.000PFPDGLAEDIDK+0.000GEVSAR+0.000QELK+0.000	sp|P13639|EF2_HUMAN	58380116	23541292	131609344	15146795	146141408	287257024	0	FALSE
FIM+15.995ESGAK+0.000	tr|H0YEU2|H0YEU2_HUMAN;tr|E9PL09|E9PL09_HUMAN;sp|P23396|RS3_HUMAN;sp|P23396-2|RS3_HUMAN	23526864	980508	17542776	67662912	43110180	88617064	0.000631958	FALSE
K+11.051LNQALLDLHALGSAR+11.032	sp|P02792|FRIL_HUMAN	1.64292e+06	1.73558e+06	1.49966e+06	2733950	4958287	26765670	0.00736945	FALSE
LVEGLQGQTWAPDWVEELR+9.038EADR+9.038QK+8.050	tr|M0QZX5|M0QZX5_HUMAN;tr|M0R026|M0R026_HUMAN;sp|A1L0T0|ILVBL_HUMAN	11030020	18801900	8320407	7873830	7.87412e+06	10252624	0	FALSE
AYLLGK+11.051EDAAR+11.032	tr|E7EMC7|E7EMC7_HUMAN;tr|C9J6J8|C9J6J8_HUMAN;tr|E3W990|E3W990_HUMAN;tr|D6RBF1|D6RBF1_HUMAN;sp|Q13501|SQSTM_HUMAN	1.85755e+06	887666	0	0	1.75746e+06	12267192	0.00435533	FALSE
THSDQFLVAFK+4.025	sp|P36542|ATPG_HUMAN;sp|P36542-2|ATPG_HUMAN	21123494	9726430	40628816	8709849	46027436	90757936	0	FALSE
R+11.032FDDAVVQSDMK+11.051HWPFM+15.995VVNDAGR+11.032PK+11.051	tr|E9PN25|E9PN25_HUMAN;tr|E9PKE3|E9PKE3_HUMAN;tr|E9PNE6|E9PNE6_HUMAN;tr|E9PQQ4|E9PQQ4_HUMAN;tr|E9PLF4|E9PLF4_HUMAN;tr|E9PN89|E9PN89_HUMAN;tr|E9PPY6|E9PPY6_HUMAN;tr|E9PK54|E9PK54_HUMAN;tr|E9PQK7|E9PQK7_HUMAN;sp|P11142|HSP7C_HUMAN;sp|P11142-2|HSP7C_HUMAN	2914026	0	7.76265e+06	6.76226e+06	15341981	28299720	0.0008716	FALSE
INPYMSSPC+57.021HIEMILTEK+1.994EQIVPK+1.994PEEEVAQK+1.994	tr|J3QQT2|J3QQT2_HUMAN;tr|A0A087WXM6|A0A087WXM6_HUMAN;tr|A0A0A0MRF8|A0A0A0MRF8_HUMAN;tr|A0A0A6YYL6|A0A0A6YYL6_HUMAN;tr|J3QLC8|J3QLC8_HUMAN;tr|J3KRX5|J3KRX5_HUMAN;sp|P18621|RL17_HUMAN;sp|P18621-2|RL17_HUMAN;sp|P18621-3|RL17_HUMAN	48976112	28180050	109631568	24364930	94742168	163785856	0	FALSE
TVIK+1.994K+1.994DEQEHEFYK+1.994	sp|P43686|PRS6B_HUMAN;sp|P43686-2|PRS6B_HUMAN	4.09767e+06	2.69818e+06	11224726	1.56419e+06	12562767	18764420	0	FALSE
AASGYPVK+4.025VPLEVQEADEAK+4.025LQQTEAELR+3.988	tr|A0A140T936|A0A140T936_HUMAN;sp|P26640|SYVC_HUMAN	28533384	11760577	48545696	2.26238e+06	30200220	72608128	0.00109305	FALSE
NIEIDSPYEISR+1.994APDELHYTYLDTFGR+1.994PVIVAYK+1.994K+1.994	tr|B7Z4L4|B7Z4L4_HUMAN;sp|P04843|RPN1_HUMAN	49404816	27448680	122353224	20079424	153670672	304658688	0	FALSE
SLPADILYEDQQC+57.021LVFR+1.994	sp|Q9BX68|HINT2_HUMAN	3.76049e+06	2.87913e+06	11026545	407601	7.99253e+06	12247191	0	FALSE
GLGTDDNTLIR+3.988	tr|Q6P452|Q6P452_HUMAN;sp|P09525|ANXA4_HUMAN;sp|P09525-2|ANXA4_HUMAN	29284226	11874654	60798872	3.12087e+06	47684192	64121740	0	FALSE
K+1.994GYEVIYLTEPVDEYC+57.021IQALPEFDGK+1.994R+1.994	sp|P14625|ENPL_HUMAN	82039304	47614992	263275856	28789090	218718064	359554752	0	FALSE
ADHQPLTEASYVNLPTIALC+57.021NTDSPLR+1.994	tr|A0A0C4DG17|A0A0C4DG17_HUMAN;tr|C9J9K3|C9J9K3_HUMAN;sp|P08865|RSSA_HUMAN	27243246	6416659	61195748	12128573	46792552	83710840	0	FALSE
THSDQFLVAFK+0.000	sp|P36542|ATPG_HUMAN;sp|P36542-2|ATPG_HUMAN	21936894	14009187	40448624	6774720	48110808	89625792	0	FALSE
ATTITSVLPK+1.994PALVASR+1.994	tr|Q5R211|Q5R211_HUMAN;sp|P31327|CPSM_HUMAN;sp|P31327-3|CPSM_HUMAN	227780208	96999552	477180864	55978836	599571008	877767616	0	FALSE
SK+1.994NILFVITK+1.994PDVYK+1.994	tr|F8VNW4|F8VNW4_HUMAN;tr|F8W1N5|F8W1N5_HUMAN;tr|F8W0W4|F8W0W4_HUMAN;tr|H0YHX9|H0YHX9_HUMAN;tr|F8VZ58|F8VZ58_HUMAN;tr|F8VZJ2|F8VZJ2_HUMAN;sp|E9PAV3|NACAM_HUMAN;sp|E9PAV3-2|NACAM_HUMAN;sp|Q9BZK3|NACP4_HUMAN;sp|Q13765|NACA_HUMAN	9650291	4607168	23136224	2.54828e+06	23742504	47616832	0	FALSE
R+1.994DNYVPEVSALDQEIIEVDPDTK+1.994EMLK+1.994	tr|A0A075B716|A0A075B716_HUMAN;tr|H3BNC9|H3BNC9_HUMAN;tr|H0YN88|H0YN88_HUMAN;sp|P08708|RS17_HUMAN	18489302	11696306	48395784	7660499	36437032	76629288	0	FALSE
IYK+1.994LDDPSC+57.021PR+1.994PEC+57.021YR+1.994	tr|H7BZU1|H7BZU1_HUMAN;sp|P41091|IF2G_HUMAN	23598488	7.99472e+06	45517716	3.30286e+06	59856744	115856864	0	FALSE
SGK+1.994TELAEPIAIR+1.994PTSETVM+15.995YPAYAK+1.994	sp|P07814|SYEP_HUMAN	7.80415e+06	4.27259e+06	20387156	0	23271706	31045290	0	FALSE
K+1.994GDEC+57.021ELLGHSK+1.994	sp|P49411|EFTU_HUMAN	7474557	4.43232e+06	26864734	3.2622e+06	35709900	55375100	0	FALSE
R+1.994DNYVPEVSALDQEIIEVDPDTK+1.994EMLK+1.994	tr|A0A075B716|A0A075B716_HUMAN;tr|H3BNC9|H3BNC9_HUMAN;tr|H0YN88|H0YN88_HUMAN;sp|P08708|RS17_HUMAN	20348530	10602040	50232344	8688278	39434832	77549560	0	FALSE
INPYM+15.995SSPC+57.021HIEMILTEK+1.994EQIVPK+1.994PEEEVAQK+1.994	tr|J3QQT2|J3QQT2_HUMAN;tr|A0A087WXM6|A0A087WXM6_HUMAN;tr|A0A0A0MRF8|A0A0A0MRF8_HUMAN;tr|A0A0A6YYL6|A0A0A6YYL6_HUMAN;tr|J3QLC8|J3QLC8_HUMAN;tr|J3KRX5|J3KRX5_HUMAN;sp|P18621|RL17_HUMAN;sp|P18621-2|RL17_HUMAN;sp|P18621-3|RL17_HUMAN	10155923	9742787	28906870	8918674	26205726	43251512	0	FALSE
VK+1.994TPSFGISAPQVSIPDVNVNLK+1.994GPK+1.994	sp|Q09666|AHNK_HUMAN	22342080	11443913	53032972	4503877	48757312	73917008	0	FALSE
EVPIPEHIDIYHLTR+3.988	tr|C9JHK9|C9JHK9_HUMAN;tr|C9JZV3|C9JZV3_HUMAN;sp|Q9UG63|ABCF2_HUMAN;sp|Q9UG63-2|ABCF2_HUMAN	2.01263e+06	1.45523e+06	4172170	559736	3744367	12571359	0	FALSE
MK+1.994EIAEAYLGK+1.994	tr|E9PKE3|E9PKE3_HUMAN;tr|E9PQQ4|E9PQQ4_HUMAN;tr|E9PI65|E9PI65_HUMAN;tr|E9PLF4|E9PLF4_HUMAN;tr|E9PN89|E9PN89_HUMAN;tr|E9PPY6|E9PPY6_HUMAN;tr|E9PK54|E9PK54_HUMAN;tr|E9PQK7|E9PQK7_HUMAN;sp|P11142|HSP7C_HUMAN;sp|P11142-2|HSP7C_HUMAN	93925344	42835588	228863152	23992208	238041488	566450880	0	FALSE
SGK+1.994TELAEPIAIR+1.994PTSETVMYPAYAK+1.994	sp|P07814|SYEP_HUMAN	30651906	17607380	52947508	5.97715e+06	57561892	74725432	0	FALSE
VVGAM+15.995QLYSVDR+9.038	tr|A0A087WVQ6|A0A087WVQ6_HUMAN;tr|A0A087WX41|A0A087WX41_HUMAN;sp|Q00610|CLH1_HUMAN;sp|Q00610-2|CLH1_HUMAN;sp|P53675|CLH2_HUMAN;sp|P53675-2|CLH2_HUMAN	69108040	42055964	48266108	2.35409e+06	56053340	88951104	0	FALSE
FHTITTSYYR+3.988	sp|P61026|RAB10_HUMAN	9085308	4.33605e+06	22741692	0	20510544	46238596	0	FALSE
ILIANTGMDTDK+1.994IK+1.994	tr|F5GWF6|F5GWF6_HUMAN;tr|F8VQ14|F8VQ14_HUMAN;sp|P78371|TCPB_HUMAN;sp|P78371-2|TCPB_HUMAN	147626896	58023268	341080768	36577020	348235136	680414848	0	FALSE
ALSEIAGMTLPYDTLDQVR+1.994	tr|B4DJ81|B4DJ81_HUMAN;sp|P28331|NDUS1_HUMAN;sp|P28331-2|NDUS1_HUMAN;sp|P28331-3|NDUS1_HUMAN;sp|P28331-4|NDUS1_HUMAN;sp|P28331-5|NDUS1_HUMAN	8820698	3.86443e+06	18552284	2.15601e+06	15640568	26649736	0	FALSE
DATNVGDEGGFAPNILENK+1.994EGLELLK+1.994	tr|A0A2R8Y6G6|A0A2R8Y6G6_HUMAN;sp|P06733|ENOA_HUMAN;sp|P06733-2|ENOA_HUMAN	12907743	6095618	38924808	7473700	37579628	56320372	0	FALSE
GYVK+1.994EQFAWR+1.994	tr|A0A1W2PQS6|A0A1W2PQS6_HUMAN;tr|A0A2R8Y6L3|A0A2R8Y6L3_HUMAN;tr|A0A2R8Y7H1|A0A2R8Y7H1_HUMAN;tr|A0A2R8YFH6|A0A2R8YFH6_HUMAN;tr|F6U211|F6U211_HUMAN;tr|S4R435|S4R435_HUMAN;sp|P46783|RS10_HUMAN	51825100	23825096	123386096	11120710	107721824	175869472	0	FALSE
DEFEGLFK+1.994QPAENVNQYLTDPK+1.994	tr|Q5JRR6|Q5JRR6_HUMAN;sp|P22314|UBA1_HUMAN;sp|P22314-2|UBA1_HUMAN	28732682	13650890	69730192	9485996	51140808	88255536	0	FALSE
K+1.994GYEVIYLTEPVDEYC+57.021IQALPEFDGK+1.994R+1.994	sp|P14625|ENPL_HUMAN	18199590	10612346	56958452	6.5654e+06	49069852	79619216	0	FALSE
LTR+1.994PGSSYFNLNPFEVLQIDPEVTDEEIK+1.994K+1.994R+1.994	sp|O75937|DNJC8_HUMAN	4.14471e+06	2120594	13353378	2.35653e+06	13131091	23258754	0	FALSE
DISTNYYASQK+1.994K+1.994	tr|H0YIV0|H0YIV0_HUMAN;sp|P14625|ENPL_HUMAN	18213876	9228357	49979472	4481538	45219404	80909248	0	FALSE
VGAGAPVYM+15.995AAVLEYLTAEILELAGNAAR+0.000	sp|Q16777|H2A2C_HUMAN;sp|Q6FI13|H2A2A_HUMAN	847415	0	11988978	12609625	455419	2312819	0.000631958	FALSE
EVQTNDLK+1.994EVVNK+1.994	tr|D6R9B6|D6R9B6_HUMAN;tr|D6RAT0|D6RAT0_HUMAN;tr|H0Y9Y4|H0Y9Y4_HUMAN;tr|D6RG13|D6RG13_HUMAN;tr|D6RB09|D6RB09_HUMAN;tr|E9PFI5|E9PFI5_HUMAN;sp|P61247|RS3A_HUMAN	71673552	32245996	169743152	17509430	149179584	244879264	0	FALSE
MSMK+4.025EVDEQMLNVQNK+4.025	tr|Q5ST81|Q5ST81_HUMAN;tr|Q5JP53|Q5JP53_HUMAN;sp|P07437|TBB5_HUMAN;sp|Q13885|TBB2A_HUMAN;sp|P68371|TBB4B_HUMAN;sp|Q9BVA1|TBB2B_HUMAN	9455661	1.97886e+06	12869393	19086590	32574162	122955200	0	FALSE
K+1.994VNVTVDYIR+1.994PASPATETVPAFSER+1.994	sp|Q7KZF4|SND1_HUMAN	23796474	11341768	72955064	7513568	40664780	86073880	0	FALSE
K+1.994FDEGR+1.994NNFEGEVTK+1.994ENLLDFIK+1.994	tr|I3L398|I3L398_HUMAN;tr|H7BZ94|H7BZ94_HUMAN;tr|I3L312|I3L312_HUMAN;sp|P07237|PDIA1_HUMAN	17628394	5618037	38005048	3.67306e+06	37275284	70976472	0.00357018	FALSE
DK+1.994YPNLQVIGGNVVTAAQAK+1.994	tr|H0Y4R1|H0Y4R1_HUMAN;sp|P12268|IMDH2_HUMAN	5.15207e+06	3.15629e+06	15001264	0	10179720	18955690	0	FALSE
GHR+1.994IEEVPELPLVVEDK+1.994VEGYK+1.994K+1.994	tr|H3BM89|H3BM89_HUMAN;sp|P36578|RL4_HUMAN	59223672	48105384	160713440	13032804	121056440	214659296	0	FALSE
SLGEIPIVESEIK+1.994K+1.994EAGELK+1.994PEEEITVGPVQK+1.994	sp|P53618|COPB_HUMAN	51882844	19014152	100882216	10066204	111333640	207606624	0	FALSE
YIYDQC+57.021PAVAGYGPIEQLPDYNR+11.032	sp|P31930|QCR1_HUMAN	16187903	3522372	38149928	16289358	33972176	69461528	0	FALSE
IGR+0.000NEC+57.021VVVIR+0.000	tr|G3V4T5|G3V4T5_HUMAN;tr|H0YJS4|H0YJS4_HUMAN;sp|P05198|IF2A_HUMAN	13577060	8047641	44144040	2.78557e+06	44741276	61097108	0	FALSE
ADTQTYQPYNK+1.994DWIK+1.994	sp|P84090|ERH_HUMAN	22978254	11156406	50252204	6.13876e+06	56287908	93256080	0	FALSE
MFVGGLSWDTSK+1.994K+1.994	tr|D6R9P3|D6R9P3_HUMAN;tr|D6RBZ0|D6RBZ0_HUMAN;tr|D6RD18|D6RD18_HUMAN;sp|Q99729|ROAA_HUMAN;sp|Q99729-2|ROAA_HUMAN;sp|Q99729-3|ROAA_HUMAN;sp|Q99729-4|ROAA_HUMAN	28457856	13612775	75212496	6509365	71463536	148100832	0	FALSE
SSGPYGGGGQYFAK+1.994PR+1.994	tr|F8W6I7|F8W6I7_HUMAN;tr|H0YH80|H0YH80_HUMAN;sp|P09651|ROA1_HUMAN;sp|P09651-2|ROA1_HUMAN;sp|P09651-3|ROA1_HUMAN	65520864	26348746	135258544	13336715	139320304	276398272	0	FALSE
INPYMSSPC+57.021HIEMILTEK+1.994EQIVPK+1.994PEEEVAQK+1.994	tr|J3QQT2|J3QQT2_HUMAN;tr|A0A087WXM6|A0A087WXM6_HUMAN;tr|A0A0A0MRF8|A0A0A0MRF8_HUMAN;tr|A0A0A6YYL6|A0A0A6YYL6_HUMAN;tr|J3QLC8|J3QLC8_HUMAN;tr|J3KRX5|J3KRX5_HUMAN;sp|P18621|RL17_HUMAN;sp|P18621-2|RL17_HUMAN;sp|P18621-3|RL17_HUMAN	95192920	54515116	208890208	40533716	175278336	311647200	0	FALSE
ER+1.994LEQQVPVNQVFGQDEMIDVIGVTK+1.994	tr|G5E9G0|G5E9G0_HUMAN;tr|H7C422|H7C422_HUMAN;tr|B5MCW2|B5MCW2_HUMAN;tr|H7C3M2|H7C3M2_HUMAN;sp|P39023|RL3_HUMAN	15013568	14706598	36671728	6.87856e+06	36456572	57577784	0	FALSE
TK+1.994DLPVTEAVFSALVTGHAR+1.994	tr|C9JCA9|C9JCA9_HUMAN;tr|B8ZZ38|B8ZZ38_HUMAN;tr|A0A0C4DG06|A0A0C4DG06_HUMAN;sp|P42704|LPPRC_HUMAN	38648668	17220706	83092744	8511772	83402040	149252896	0	FALSE
IEYDTFGELK+1.994VPNDK+1.994YYGAQTVR+1.994	sp|P07954|FUMH_HUMAN;sp|P07954-2|FUMH_HUMAN	23837808	8988669	48818000	6.38651e+06	51931304	82298584	0	FALSE
NQHLVSQQK+8.050DPDTEEYR+9.038K+8.050	sp|P12270|TPR_HUMAN	7374778	2.44754e+06	11200937	11952076	11387997	23189310	0.00671398	FALSE
GHEGPVWQVAWAHPMYGNILASC+57.021SYDR+1.994K+1.994	tr|E7ERC8|E7ERC8_HUMAN;tr|A8MXL6|A8MXL6_HUMAN;sp|P55735|SEC13_HUMAN;sp|P55735-2|SEC13_HUMAN;sp|P55735-3|SEC13_HUMAN;sp|P55735-4|SEC13_HUMAN	9579207	8.26628e+06	31631388	3.85013e+06	29724450	62421956	0	FALSE
TPALVNAAVTYSK+1.994PR+1.994	tr|A0A3B3ITX4|A0A3B3ITX4_HUMAN;tr|E9PN17|E9PN17_HUMAN;tr|A0A3B3IRW3|A0A3B3IRW3_HUMAN;sp|O75964|ATP5L_HUMAN	11807186	5.26319e+06	21858228	3402217	24192064	44758060	0	FALSE
SPLAGDFITMQC+57.021R+3.988	sp|O96019|ACL6A_HUMAN;sp|O96019-2|ACL6A_HUMAN	24034968	7.18716e+06	50756072	4.03552e+06	49540536	124124224	0	FALSE
R+1.994AEDGSVIDYELIDQDAR+1.994DLYDAGVK+1.994	tr|H0YMD0|H0YMD0_HUMAN;tr|H0YL33|H0YL33_HUMAN;tr|H0YN42|H0YN42_HUMAN;tr|H0YMU9|H0YMU9_HUMAN;tr|H0YM50|H0YM50_HUMAN;tr|H0YN28|H0YN28_HUMAN;tr|H0YNP5|H0YNP5_HUMAN;sp|P07355|ANXA2_HUMAN;sp|P07355-2|ANXA2_HUMAN	19235972	7.69273e+06	50790436	8.28951e+06	49943880	116455240	0	FALSE
TVSLGAGAK+11.051DELHIVEAEAM+15.995NYEGSPIK+11.051	sp|P06748|NPM_HUMAN;sp|P06748-2|NPM_HUMAN;sp|P06748-3|NPM_HUMAN	1290198	862856	2.83458e+06	1.24352e+06	1.07587e+06	7.82254e+06	0	FALSE
R+1.994GQIC+57.021WYQK+1.994PGVGLDAINDANLLEAC+57.021IYR+1.994	tr|A0A087WVN4|A0A087WVN4_HUMAN;tr|A0A087X090|A0A087X090_HUMAN;sp|P14324|FPPS_HUMAN;sp|P14324-2|FPPS_HUMAN	14596119	7.92058e+06	37206340	3.86597e+06	28988650	37189536	0	FALSE
GHR+1.994IEEVPELPLVVEDK+1.994VEGYK+1.994K+1.994	tr|H3BM89|H3BM89_HUMAN;sp|P36578|RL4_HUMAN	54536800	37564372	148387968	13206555	123466984	216836320	0	FALSE
SIFYVPDMK+1.994PSMFDVSR+1.994	tr|I3L239|I3L239_HUMAN;tr|I3L0K7|I3L0K7_HUMAN;sp|Q12931|TRAP1_HUMAN;sp|Q12931-2|TRAP1_HUMAN	11148387	7784454	28768120	2.62893e+06	22880436	39888196	0	FALSE
K+1.994HQALQAEIAGHEPR+1.994	tr|A0A0D9SF54|A0A0D9SF54_HUMAN;tr|A0A0D9SGF6|A0A0D9SGF6_HUMAN;sp|Q13813|SPTN1_HUMAN;sp|Q13813-2|SPTN1_HUMAN;sp|Q13813-3|SPTN1_HUMAN	14244804	5651082	28196698	3.22442e+06	23360202	51172184	0	FALSE
DLK+4.025PSNIFLVDTK+4.025	sp|P19525|E2AK2_HUMAN;sp|P19525-2|E2AK2_HUMAN	27215412	7.56695e+06	32456662	4.99904e+06	38340500	72591256	0	FALSE
DINAYNC+57.021EEPTEK+1.994LPFPIIDDR+1.994	sp|P30041|PRDX6_HUMAN	804673	1.6369e+06	9151098	0	5829989	15876573	0	FALSE
K+1.994GGPSPGDVEAIK+1.994NAIANASTLAEVER+1.994	tr|H0YMA0|H0YMA0_HUMAN;tr|H0YLR3|H0YLR3_HUMAN;sp|P09661|RU2A_HUMAN	19390270	16444817	46699696	3.01711e+06	47586456	81877176	0	FALSE
HGESIC+57.021LSPC+57.021NTLAAVTDDFGR+1.994	sp|Q9H2M9|RBGPR_HUMAN	7092209	4288328	9513650	0	10072919	15584210	0	FALSE
NLLESYHVPELIK+1.994DAHLLVESK+1.994	sp|P42704|LPPRC_HUMAN	13633351	38968908	23570460	3.28853e+06	19205354	37341200	0	FALSE
TQLASWSDPTEETGPVAGILDTETLEK+1.994	tr|H0YDN1|H0YDN1_HUMAN;sp|Q15149|PLEC_HUMAN;sp|Q15149-2|PLEC_HUMAN;sp|Q15149-3|PLEC_HUMAN;sp|Q15149-4|PLEC_HUMAN;sp|Q15149-5|PLEC_HUMAN;sp|Q15149-6|PLEC_HUMAN;sp|Q15149-7|PLEC_HUMAN;sp|Q15149-8|PLEC_HUMAN;sp|Q15149-9|PLEC_HUMAN	44769592	10521304	77823104	28480500	88469008	185503776	0	FALSE
MIYASSK+1.994DAIK+1.994	tr|G3V1A4|G3V1A4_HUMAN;tr|E9PQB7|E9PQB7_HUMAN;tr|E9PP50|E9PP50_HUMAN;tr|F6RFD5|F6RFD5_HUMAN;tr|E9PK25|E9PK25_HUMAN;sp|P60981|DEST_HUMAN;sp|P60981-2|DEST_HUMAN;sp|P23528|COF1_HUMAN;sp|Q9Y281|COF2_HUMAN;sp|Q9Y281-3|COF2_HUMAN	27411602	11155462	92919992	17814628	81135928	116061832	0	FALSE
M+15.995DATANDVPSPYEVR+1.994	sp|P30101|PDIA3_HUMAN	5.04983e+06	8730819	22661596	1.00557e+06	30499606	83896728	0	FALSE
VHLTPYTVDSPIC+57.021DFLELQR+1.994	tr|E5RHJ4|E5RHJ4_HUMAN;sp|Q8N163|CCAR2_HUMAN;sp|Q8N163-2|CCAR2_HUMAN	8455830	2625387	19186764	3.77979e+06	19749798	44097760	0.000209315	FALSE
YIYDQC+57.021PAVAGYGPIEQLPDYNR+1.994	sp|P31930|QCR1_HUMAN	88263432	19778002	163910624	33208148	188480480	289276448	0	FALSE
ASEPGLAQLLVDQIYENAMIAAGLVDDPR+1.994	tr|I3L253|I3L253_HUMAN;tr|I3L0K7|I3L0K7_HUMAN;sp|Q12931|TRAP1_HUMAN;sp|Q12931-2|TRAP1_HUMAN	4218210	1305000	7242883	1.55728e+06	6861675	12678054	0	FALSE
SIQFVDWC+57.021PTGFK+1.994	sp|P68363|TBA1B_HUMAN;sp|P68363-2|TBA1B_HUMAN;sp|P68366|TBA4A_HUMAN;sp|P68366-2|TBA4A_HUMAN	322091776	169654272	1019671936	175338624	1118396288	2369017600	0.000356979	FALSE
INK+1.994GVATNWLR+1.994	tr|E7EMD0|E7EMD0_HUMAN;tr|H0Y4R2|H0Y4R2_HUMAN;sp|P16435|NCPR_HUMAN	8989812	6.05039e+06	35796544	2.91562e+06	35762968	68481680	0	FALSE
YHGHSMSDPGVSYR+1.994	tr|Q5JPU3|Q5JPU3_HUMAN;sp|P29803|ODPAT_HUMAN;sp|P08559|ODPA_HUMAN;sp|P08559-2|ODPA_HUMAN;sp|P08559-3|ODPA_HUMAN;sp|P08559-4|ODPA_HUMAN	43759900	2341279	29470544	0	29844316	41345276	0	FALSE
K+1.994PYIWEYSR+1.994	tr|V9GYZ6|V9GYZ6_HUMAN;sp|P07814|SYEP_HUMAN	43942980	16697837	83159712	4061186	93730168	130444640	0	FALSE
AYQK+1.994QPTIFQNK+1.994	tr|M0QZC5|M0QZC5_HUMAN;tr|M0R1H6|M0R1H6_HUMAN;sp|P62280|RS11_HUMAN	104575736	8665836	25230568	22195042	21314380	46239716	0	FALSE
LDLWNLNNDTEVPTASISVEGNPALNR+1.994	sp|Q13409|DC1I2_HUMAN;sp|Q13409-2|DC1I2_HUMAN;sp|Q13409-3|DC1I2_HUMAN;sp|Q13409-5|DC1I2_HUMAN;sp|Q13409-6|DC1I2_HUMAN;sp|Q13409-7|DC1I2_HUMAN	12709409	6.35953e+06	24116536	10204524	15940520	27190406	0	FALSE
M+15.995K+1.994EIAEAYLGK+1.994	tr|E9PKE3|E9PKE3_HUMAN;tr|E9PQQ4|E9PQQ4_HUMAN;tr|E9PI65|E9PI65_HUMAN;tr|E9PLF4|E9PLF4_HUMAN;tr|E9PN89|E9PN89_HUMAN;tr|E9PPY6|E9PPY6_HUMAN;tr|E9PK54|E9PK54_HUMAN;tr|E9PQK7|E9PQK7_HUMAN;sp|P11142|HSP7C_HUMAN;sp|P11142-2|HSP7C_HUMAN	32414042	11933810	54509796	6442061	51871508	125601184	0	FALSE
IIPTLEEGLQLPSPTATSQLPLESDAVEC+57.021LNYQHYK+1.994	sp|P61978|HNRPK_HUMAN;sp|P61978-2|HNRPK_HUMAN	304363968	228656272	614982912	461810560	813927744	1489344384	0.000209315	FALSE
HIGLVYSGMGPDYR+1.994	tr|A0A024RA52|A0A024RA52_HUMAN;sp|P25787|PSA2_HUMAN	27216364	5.51789e+06	53457516	52490632	33359704	45815316	0	FALSE
R+1.994AEDGSVIDYELIDQDAR+1.994DLYDAGVK+1.994	tr|H0YMD0|H0YMD0_HUMAN;tr|H0YL33|H0YL33_HUMAN;tr|H0YN42|H0YN42_HUMAN;tr|H0YMU9|H0YMU9_HUMAN;tr|H0YM50|H0YM50_HUMAN;tr|H0YN28|H0YN28_HUMAN;tr|H0YNP5|H0YNP5_HUMAN;sp|P07355|ANXA2_HUMAN;sp|P07355-2|ANXA2_HUMAN	44589688	13986798	94188032	18110258	84478864	205923472	0	FALSE
SLEQNIQLPAALLSR+1.994	sp|P33993|MCM7_HUMAN;sp|P33993-3|MCM7_HUMAN	46495248	10321028	38659372	247519	49953352	104850112	0	FALSE
LMEPIYLVEIQC+57.021PEQVVGGIYGVLNR+1.994	sp|P13639|EF2_HUMAN	29295736	13603818	39126624	9032037	28560266	76360616	0	FALSE
GGPEVQQVPAGER+1.994PLWFIC+57.021SGM+15.995GTQWR+1.994	tr|A0A0U1RQF0|A0A0U1RQF0_HUMAN;sp|P49327|FAS_HUMAN	16301591	28681006	60205284	5374222	27715076	38628392	0	FALSE
ELLLSAIDSVNATSK+1.994	sp|P46087|NOP2_HUMAN;sp|P46087-2|NOP2_HUMAN;sp|P46087-3|NOP2_HUMAN;sp|P46087-4|NOP2_HUMAN	13521087	5366073	26850202	1.94063e+06	23868854	59721300	0	FALSE
IFHTVTTTDDPVIR+1.994	tr|B0QYA5|B0QYA5_HUMAN;tr|B0QYA4|B0QYA4_HUMAN;sp|O15371|EIF3D_HUMAN;sp|O15371-2|EIF3D_HUMAN;sp|O15371-3|EIF3D_HUMAN	22444004	6.71762e+06	26722008	1.99959e+06	23893178	49806136	0	FALSE
VK+1.994PFMTGAAEQIK+1.994	tr|A0A0B4J2C3|A0A0B4J2C3_HUMAN;tr|E9PJF7|E9PJF7_HUMAN;tr|J3KPG2|J3KPG2_HUMAN;tr|Q5W0H4|Q5W0H4_HUMAN;sp|P13693|TCTP_HUMAN;sp|P13693-2|TCTP_HUMAN;sp|Q56UQ5|TPT1L_HUMAN	106138472	40143868	250873920	27275126	208260768	618303168	0	FALSE
NIEIDSPYEISR+1.994APDELHYTYLDTFGR+1.994PVIVAYK+1.994K+1.994	tr|B7Z4L4|B7Z4L4_HUMAN;sp|P04843|RPN1_HUMAN	21608164	4583691	24858006	3.56987e+06	32201308	63988460	0	FALSE
MTEEEVEMLVAGHEDSNGC+57.021INYEGK+1.994R+1.994R+1.994	tr|G3V1V0|G3V1V0_HUMAN;tr|H0YI43|H0YI43_HUMAN	3.69238e+06	20247998	45557448	0	0	0	0	FALSE
ELQNAPDAIPESGVEPPALDTAWVEATR+1.994	tr|C9JFE4|C9JFE4_HUMAN;tr|A8K070|A8K070_HUMAN;tr|A0A096LP07|A0A096LP07_HUMAN;tr|J3KRJ4|J3KRJ4_HUMAN;tr|J3KTB0|J3KTB0_HUMAN;tr|J3KSA5|J3KSA5_HUMAN;tr|J3QLT0|J3QLT0_HUMAN;tr|J3QS88|J3QS88_HUMAN;tr|A0A096LPJ3|A0A096LPJ3_HUMAN;sp|Q13098|CSN1_HUMAN;sp|Q13098-5|CSN1_HUMAN;sp|Q13098-7|CSN1_HUMAN	14346985	2.1037e+06	27060456	10560328	22597126	47669416	0	FALSE
WNLDELPK+1.994FEK+1.994	tr|J3QR02|J3QR02_HUMAN;tr|J3KTA4|J3KTA4_HUMAN;tr|J3QRQ7|J3QRQ7_HUMAN;tr|J3KRX8|J3KRX8_HUMAN;tr|X6RLV5|X6RLV5_HUMAN;tr|J3KTQ4|J3KTQ4_HUMAN;sp|P17844|DDX5_HUMAN;sp|P17844-2|DDX5_HUMAN	17068132	6.64072e+06	37611012	4968625	61684668	134503008	0	FALSE
TTGFGMIYDSLDYAK+1.994	tr|A0A2R8Y849|A0A2R8Y849_HUMAN;tr|A0A2R8Y8A0|A0A2R8Y8A0_HUMAN;tr|A0A087WUS0|A0A087WUS0_HUMAN;tr|E7ETK0|E7ETK0_HUMAN;tr|A0A2R8YD14|A0A2R8YD14_HUMAN;sp|P62847|RS24_HUMAN;sp|P62847-2|RS24_HUMAN;sp|P62847-3|RS24_HUMAN;sp|P62847-4|RS24_HUMAN	39243744	23049152	102745448	13651828	87355848	170094576	0	FALSE
GEGYAK+1.994PNEGAIVEVALEGYYK+1.994DK+1.994LFDQR+1.994	sp|Q02790|FKBP4_HUMAN	5050782	5.02991e+06	13329881	0	13658539	23239810	0	FALSE
IDATQVEVNPFGETPEGQVVC+57.021FDAK+1.994	tr|E9PDQ8|E9PDQ8_HUMAN;sp|Q96I99|SUCB2_HUMAN;sp|Q96I99-2|SUCB2_HUMAN	18589892	5562152	39298084	15876529	28131168	48439672	0	FALSE
ASEPGLAQLLVDQIYENAM+15.995IAAGLVDDPR+1.994	tr|I3L253|I3L253_HUMAN;tr|I3L0K7|I3L0K7_HUMAN;sp|Q12931|TRAP1_HUMAN;sp|Q12931-2|TRAP1_HUMAN	1.76452e+06	383004	2.54475e+06	1.26552e+06	1.49146e+06	3531186	0	FALSE
DGIISDIFDK+1.994K+1.994	sp|P19525|E2AK2_HUMAN;sp|P19525-2|E2AK2_HUMAN	1.17521e+06	956813	3610342	478337	5.21795e+06	10261615	0	FALSE
IMNVIGEPIDER+1.994GPIK+1.994	tr|F8W079|F8W079_HUMAN;tr|H0YH81|H0YH81_HUMAN;sp|P06576|ATPB_HUMAN	113639416	46304036	232694848	27718964	256780064	429753248	0	FALSE
GQILTM+15.995ANPIIGNGGAPDTTALDELGLSK+1.994	tr|C9JTA4|C9JTA4_HUMAN;tr|E7EWJ3|E7EWJ3_HUMAN;tr|Q5R211|Q5R211_HUMAN;sp|P31327|CPSM_HUMAN;sp|P31327-3|CPSM_HUMAN	4960729	4275758	7.62443e+06	10900369	17218750	22248786	0	FALSE
SPGVVISDDEPGYDLDLFC+57.021IPNHYAEDLER+1.994	sp|P00492|HPRT_HUMAN	81395504	22256384	134570992	71595536	58377088	331074272	0	FALSE
GAEEMETVIPVDVMR+1.994	tr|K7ELW0|K7ELW0_HUMAN;sp|Q99497|PARK7_HUMAN	29753606	41536692	174606944	9083937	163645680	250719936	0	FALSE
ADTLTPEEC+57.021QQFK+1.994K+1.994	tr|A0A0U1RRE1|A0A0U1RRE1_HUMAN;tr|E7ES33|E7ES33_HUMAN;tr|G3V1Q4|G3V1Q4_HUMAN;tr|E7EPK1|E7EPK1_HUMAN;sp|Q16181|SEPT7_HUMAN;sp|Q16181-2|SEPT7_HUMAN	31373698	13711786	77139464	12298859	73025808	113804536	0	FALSE
VIHDNFGIVEGLM+15.995TTVHAITATQK+4.025	tr|E7EUT5|E7EUT5_HUMAN;sp|P04406|G3P_HUMAN;sp|P04406-2|G3P_HUMAN	11242293	6.57201e+06	26417706	3524829	21248292	44201628	0	FALSE
VLGTSVESIMATEDR+1.994	sp|P31327|CPSM_HUMAN;sp|P31327-2|CPSM_HUMAN;sp|P31327-3|CPSM_HUMAN	37559816	20981172	25130470	18598342	17143110	68524368	0	FALSE
DGNASGTTLLEALDC+57.021ILPPTR+1.994PTDK+1.994PLR+1.994LPLQDVYK+1.994	tr|A0A087WV01|A0A087WV01_HUMAN;tr|A0A087WVQ9|A0A087WVQ9_HUMAN;sp|Q5VTE0|EF1A3_HUMAN;sp|P68104|EF1A1_HUMAN;sp|P68104-2|EF1A1_HUMAN	28106988	16639605	76506080	7253334	54647452	103856056	0	FALSE
EGDAHPLGALPVGTLINNVESEPGR+1.994	tr|C9IY40|C9IY40_HUMAN;sp|Q5T653|RM02_HUMAN	20758516	4.80178e+06	36660340	8760597	35096296	72981440	0	FALSE
LQTLVSEQPNK+1.994DVVEQMEK+1.994	sp|Q86UP2|KTN1_HUMAN;sp|Q86UP2-2|KTN1_HUMAN;sp|Q86UP2-3|KTN1_HUMAN;sp|Q86UP2-4|KTN1_HUMAN	5.47407e+06	12956847	47298232	7951037	41156124	64160148	0	FALSE
YIYDQC+57.021PAVAGYGPIEQLPDYNR+1.994	sp|P31930|QCR1_HUMAN	16565410	2.54555e+06	37842624	14689711	36993632	66085300	0	FALSE
LQNALNEQR+1.994VEFATLQEALAHALTEK+1.994EGK+1.994DQELAK+1.994	tr|A0A087WY61|A0A087WY61_HUMAN;sp|Q14980|NUMA1_HUMAN;sp|Q14980-2|NUMA1_HUMAN;sp|Q14980-3|NUMA1_HUMAN;sp|Q14980-4|NUMA1_HUMAN	9633918	7034528	22744508	2.53748e+06	35022992	48182728	0	FALSE
LM+15.995EPIYLVEIQC+57.021PEQVVGGIYGVLNR+1.994	sp|P13639|EF2_HUMAN	13847318	5.70756e+06	38310484	18367108	20334214	56812892	0	FALSE
PGLAPEPLSAPPGSPPPSAAPTSATSNSSNGGGPSK+4.025	tr|C9J2I3|C9J2I3_HUMAN;sp|P14651|HXB3_HUMAN;sp|P14651-2|HXB3_HUMAN	0	11924935	17547590	21976042	39687480	38218464	0.00166009	FALSE
ELAVQIYEEAR+1.994K+1.994	tr|A0A2R8Y5G6|A0A2R8Y5G6_HUMAN;tr|A0A0D9SG12|A0A0D9SG12_HUMAN;tr|A0A2R8YFR4|A0A2R8YFR4_HUMAN;tr|A0A2R8YDH3|A0A2R8YDH3_HUMAN;tr|A0A2R8YF78|A0A2R8YF78_HUMAN;tr|A0A0D9SFB3|A0A0D9SFB3_HUMAN;tr|A0A2R8YCW1|A0A2R8YCW1_HUMAN;tr|A0A0D9SF53|A0A0D9SF53_HUMAN;tr|A0A2R8Y7T2|A0A2R8Y7T2_HUMAN;tr|A0A2R8YDT5|A0A2R8YDT5_HUMAN;tr|A0A2U3TZJ9|A0A2U3TZJ9_HUMAN;tr|A0A2R8Y4A4|A0A2R8Y4A4_HUMAN;tr|A0A2R8Y645|A0A2R8Y645_HU…	25714192	10840653	50999256	14583837	66602376	129422880	0	FALSE
YYGGGSEGGR+1.994APK+1.994	sp|P14866|HNRPL_HUMAN	50879872	14267754	31698430	2.74628e+06	33368252	62076168	0	FALSE
GAEEMETVIPVDVMR+1.994	tr|K7ELW0|K7ELW0_HUMAN;sp|Q99497|PARK7_HUMAN	12805118	7.18418e+06	37074028	0	31769782	52236228	0	FALSE
EVGETLLYYGC+57.021R+1.994	tr|E7EMD0|E7EMD0_HUMAN;tr|H0Y4R2|H0Y4R2_HUMAN;sp|P16435|NCPR_HUMAN	28403670	16208195	70309736	0	65632688	107558144	0	FALSE
ITSAVWGPLGEC+57.021IIAGHESGELNQYSAK+1.994	sp|Q13347|EIF3I_HUMAN	3597585	4.11405e+06	2.17023e+06	15190373	3330720	12771447	0.000106883	FALSE
SNM+15.995DNMFESYINNLR+3.988R+3.988	tr|F8VP67|F8VP67_HUMAN;tr|F8VUG2|F8VUG2_HUMAN;tr|F8W1U3|F8W1U3_HUMAN;sp|P05787|K2C8_HUMAN;sp|P05787-2|K2C8_HUMAN	24853324	11525028	54534404	1.74565e+06	36477236	101832952	0.000209315	FALSE
GLLPLVTILGLPNLPIDFPTSAAC+57.021QAVAGVC+57.021K+1.994	sp|Q7Z6Z7|HUWE1_HUMAN;sp|Q7Z6Z7-2|HUWE1_HUMAN;sp|Q7Z6Z7-3|HUWE1_HUMAN	1.0423e+06	1.64361e+06	3.39759e+06	2132958	2.61162e+06	4586681	0	FALSE
DGNASGTTLLEALDC+57.021ILPPTR+1.994PTDK+1.994PLR+1.994LPLQDVYK+1.994	tr|A0A087WV01|A0A087WV01_HUMAN;tr|A0A087WVQ9|A0A087WVQ9_HUMAN;sp|Q5VTE0|EF1A3_HUMAN;sp|P68104|EF1A1_HUMAN;sp|P68104-2|EF1A1_HUMAN	28903322	10491888	59400532	8665699	51179516	91267704	0	FALSE
GVVPLAGTDGETTTQGLDGLSER+1.994	tr|J3QKP5|J3QKP5_HUMAN;tr|K7EKH5|K7EKH5_HUMAN;tr|A8MVZ9|A8MVZ9_HUMAN;tr|C9J8F3|C9J8F3_HUMAN;tr|J3KSV6|J3KSV6_HUMAN;sp|P09972|ALDOC_HUMAN	60789872	13580746	130559360	11700038	100999400	233268224	0	FALSE
IK+1.994DAFDR+1.994NPELQNLLLDDFFK+1.994	sp|P52209|6PGD_HUMAN;sp|P52209-2|6PGD_HUMAN	8561592	4.71326e+06	24353122	2.07665e+06	22661238	34408708	0.00148208	FALSE
M+15.995QHLNPDPQLIPEQITTDITPEC+57.021LVSPR+1.994	tr|A0A0U1RRM8|A0A0U1RRM8_HUMAN;tr|H0YJ34|H0YJ34_HUMAN;tr|H0YJB6|H0YJB6_HUMAN;sp|Q96AC1|FERM2_HUMAN;sp|Q96AC1-2|FERM2_HUMAN;sp|Q96AC1-3|FERM2_HUMAN	7.37397e+06	1.134e+06	12280936	3.95261e+06	7800723	17508402	0	FALSE
WDLSELPK+1.994FEK+1.994	tr|A0A1X7SBZ2|A0A1X7SBZ2_HUMAN;tr|A0A1W2PQ51|A0A1W2PQ51_HUMAN;sp|Q92841|DDX17_HUMAN;sp|Q92841-1|DDX17_HUMAN;sp|Q92841-2|DDX17_HUMAN;sp|Q92841-3|DDX17_HUMAN	13846959	5.56768e+06	30832926	4281548	32538834	70141880	0	FALSE
LDGLVETPTGYIESLPR+11.032	tr|B7Z9C2|B7Z9C2_HUMAN;tr|F8W0J6|F8W0J6_HUMAN;tr|F8VRJ2|F8VRJ2_HUMAN;tr|H0YHC3|H0YHC3_HUMAN;tr|F8W118|F8W118_HUMAN;tr|F8VV59|F8VV59_HUMAN;tr|F8W020|F8W020_HUMAN;tr|H0YIV4|H0YIV4_HUMAN;tr|F5H4R6|F5H4R6_HUMAN;tr|F8VUX1|F8VUX1_HUMAN;tr|F8VY35|F8VY35_HUMAN;tr|F8VXI6|F8VXI6_HUMAN;sp|P55209|NP1L1_HUMAN;sp|P55209-2|NP1L1_HUMAN;sp|P55209-3|NP1L1_HUMAN	45991688	13920152	89288880	8582568	92813008	191251024	0	FALSE
AR+1.994FEELNADLFR+1.994	tr|A8K7Q2|A8K7Q2_HUMAN;tr|E9PKE3|E9PKE3_HUMAN;tr|E9PNE6|E9PNE6_HUMAN;tr|E9PN89|E9PN89_HUMAN;sp|P54652|HSP72_HUMAN;sp|P11142|HSP7C_HUMAN;sp|P11142-2|HSP7C_HUMAN	19883172	9031329	45493420	4061235	45409392	111618208	0	FALSE
LMEPIYLVEIQC+57.021PEQVVGGIYGVLNR+1.994	sp|P13639|EF2_HUMAN	14738904	14819575	37129588	21966528	24550306	80086360	0	FALSE
LR+1.994HEILLSQSVR+1.994	sp|P54886|P5CS_HUMAN;sp|P54886-2|P5CS_HUMAN	17137690	11603010	44815964	5.15249e+06	58635780	116960664	0	FALSE
K+1.994SEIEYYAMLAK+1.994	tr|E5RI99|E5RI99_HUMAN;sp|P62888|RL30_HUMAN	22844680	11206658	59088488	3970987	44641356	83171176	0	FALSE
ITNDFYPEEDGK+1.994TK+1.994	tr|C9JZG1|C9JZG1_HUMAN;sp|P55884|EIF3B_HUMAN;sp|P55884-2|EIF3B_HUMAN	39527508	16985640	95140128	12471943	61222216	202345920	0	FALSE
DIK+1.994PENLLLGLK+1.994GELK+1.994	tr|J3KTD6|J3KTD6_HUMAN;tr|J3KT86|J3KT86_HUMAN;tr|J3QLN8|J3QLN8_HUMAN;sp|Q96GD4|AURKB_HUMAN;sp|Q96GD4-2|AURKB_HUMAN;sp|Q96GD4-4|AURKB_HUMAN;sp|Q96GD4-5|AURKB_HUMAN	703004	486237	3.12951e+06	708047	10530224	22041840	0	FALSE
VVSSIEQK+1.994TEGAEK+1.994	tr|E9PD24|E9PD24_HUMAN;tr|E7ESK7|E7ESK7_HUMAN;tr|E5RIR4|E5RIR4_HUMAN;tr|E7EVZ2|E7EVZ2_HUMAN;tr|E7EX29|E7EX29_HUMAN;sp|P63104|1433Z_HUMAN	5.41484e+06	7632380	23987252	1249706	10448088	26660548	0	FALSE
YVEPIEDVPC+57.021GNIVGLVGVDQFLVK+1.994	sp|P13639|EF2_HUMAN	28821380	31288550	72357240	70601696	113734176	289083360	0	FALSE
TQSTWVDSFFR+9.038	sp|O94874|UFL1_HUMAN;sp|O94874-2|UFL1_HUMAN;sp|O94874-3|UFL1_HUMAN	0	1.32045e+06	12249738	0	6880790	12810677	0	FALSE
IASWADLVNAHVVPGSGVVK+1.994	sp|P11172|UMPS_HUMAN;sp|P11172-2|UMPS_HUMAN;sp|P11172-3|UMPS_HUMAN	11727590	5.6459e+06	24063798	13856326	19239172	45915696	0	FALSE
EAYPGDVFYLHSR+1.994	sp|P25705|ATPA_HUMAN;sp|P25705-2|ATPA_HUMAN;sp|P25705-3|ATPA_HUMAN	2.27434e+06	6556154	21977224	0	27671518	45689212	0	FALSE
GHK+4.025FHHTIGGSR+3.988	tr|E7ERA2|E7ERA2_HUMAN;sp|P61313|RL15_HUMAN	11084210	4.43622e+06	25371500	1.72794e+06	21233170	32201046	0	FALSE
IMNVIGEPIDER+1.994GPIK+1.994	tr|F8W079|F8W079_HUMAN;tr|H0YH81|H0YH81_HUMAN;sp|P06576|ATPB_HUMAN	17145184	4695988	44451300	3.57539e+06	35490740	62193372	0	FALSE
LNLSVTTPYNADFDGDEMNLHLPQSLETR+1.994	sp|P24928|RPB1_HUMAN;sp|P24928-2|RPB1_HUMAN	7.62235e+06	4.03379e+06	12427300	4539009	21543126	36368340	0	FALSE
ALVLDC+57.021HYPEDEVGQEDEAESDIFSIR+1.994	tr|I3L3Q7|I3L3Q7_HUMAN;tr|I3L3B0|I3L3B0_HUMAN;sp|Q07021|C1QBP_HUMAN	227763248	64571792	571833152	101001528	588718912	982708416	0	FALSE
LMEPIYLVEIQC+57.021PEQVVGGIYGVLNR+1.994	sp|P13639|EF2_HUMAN	21216896	14077794	35404948	14854158	22832268	77679024	0	FALSE
R+1.994GPPLR+1.994SER+1.994EEVSSWR+1.994	sp|Q14152|EIF3A_HUMAN;sp|Q14152-2|EIF3A_HUMAN	29154848	15627969	69799912	3.62232e+06	63641612	144330112	0	FALSE
NAVEEYVYEMR+3.988	tr|A0A087WYC1|A0A087WYC1_HUMAN;sp|P34932|HSP74_HUMAN	3.31889e+06	2.23899e+06	6.62711e+06	2.49236e+06	4.85499e+06	11854435	0	FALSE
VLLSIC+57.021SLLC+57.021DPNPDDPLVPEIAR+1.994	tr|A0A087WY85|A0A087WY85_HUMAN;tr|D6RAH7|D6RAH7_HUMAN;tr|A0A0A0MQU3|A0A0A0MQU3_HUMAN;tr|D6RFM0|D6RFM0_HUMAN;tr|H9KV45|H9KV45_HUMAN;sp|P61077|UB2D3_HUMAN;sp|P61077-2|UB2D3_HUMAN;sp|P61077-3|UB2D3_HUMAN;sp|P62837|UB2D2_HUMAN;sp|P62837-2|UB2D2_HUMAN	24529964	11391399	43346468	18441640	27816134	60239456	0	FALSE
K+1.994LEELELDEQQK+1.994K+1.994	sp|P36507|MP2K2_HUMAN	28301106	9061187	35048720	3.42878e+06	27812720	58522428	0	FALSE
VGAGAPVYLAAVLEYLTAEILELAGNAAR+1.994	tr|H0YFX9|H0YFX9_HUMAN;tr|A0A3B3IS11|A0A3B3IS11_HUMAN;tr|A0A0U1RRH7|A0A0U1RRH7_HUMAN;tr|A0A0U1RR32|A0A0U1RR32_HUMAN;sp|Q9BTM1|H2AJ_HUMAN;sp|Q9BTM1-2|H2AJ_HUMAN;sp|P04908|H2A1B_HUMAN;sp|P20671|H2A1D_HUMAN;sp|P0C0S8|H2A1_HUMAN;sp|Q96KK5|H2A1H_HUMAN;sp|Q93077|H2A1C_HUMAN;sp|Q8IUE6|H2A2B_HUMAN;sp|Q99878|H2A1J_HUMAN;sp|Q7L7L0|H2A3_HUMAN;sp|P16104|H2AX_HUMAN	45554768	28415584	10074571	10040369	5.66543e+06	8493214	0	FALSE
GILADEDSSR+1.994PVWLK+1.994	tr|A0A0U1RQF0|A0A0U1RQF0_HUMAN;sp|P49327|FAS_HUMAN	158190064	82780912	309436736	27123008	198043408	290720480	0	FALSE
ASEIMVDDEELAQHPATTEDIR+1.994	sp|Q8IY81|SPB1_HUMAN	8759718	1.84101e+06	22517576	1.84942e+06	21936662	36726120	0	FALSE
HHPDLIFC+57.021R+11.032	sp|Q7RTV0|PHF5A_HUMAN	0	0	1.91039e+06	2357761	10085801	19972530	0.000585995	FALSE
IITVEK+4.025HPDADSLYVEK+4.025IDVGEAEPR+3.988	sp|P54577|SYYC_HUMAN	9810027	7807023	7943910	5488719	14472469	17322574	0.000394536	FALSE
IK+1.994ELTSTC+57.021SPIISK+1.994PK+1.994PK+1.994	sp|P34932|HSP74_HUMAN	27531768	15347516	104669168	4116816	104483696	158982672	0	FALSE
DLQPFPTC+57.021QALVYR+1.994	sp|Q14137|BOP1_HUMAN;sp|Q14137-2|BOP1_HUMAN	13093245	17815664	47955904	4450648	52328704	80348792	0	FALSE
NTGDADQWC+57.021PLLETLTDAEMEK+8.050K+8.050	tr|A0A0G2JRV3|A0A0G2JRV3_HUMAN;tr|G5E975|G5E975_HUMAN;sp|Q12824|SNF5_HUMAN;sp|Q12824-2|SNF5_HUMAN	3656281	1.41798e+06	15740266	7758141	18473208	35586264	0	FALSE
GPQGLQGQQGGAGPTGPPGEPGDPGPMGPIGSR+9.038	tr|A0A3B3IRH9|A0A3B3IRH9_HUMAN;tr|A0A087WYX9|A0A087WYX9_HUMAN;sp|P05997|CO5A2_HUMAN	0	96541888	30000882	28456332	119678232	247946832	0.00452352	FALSE
R+11.032NQDLAPNSAEQASILSLVTK+11.051	tr|A0A0A0MRL0|A0A0A0MRL0_HUMAN;tr|X6R6Z1|X6R6Z1_HUMAN;tr|B4DY09|B4DY09_HUMAN;sp|Q12905|ILF2_HUMAN	914731	1.04261e+06	1.68634e+06	0	1487823	4340593	0	FALSE
PNFSGNWK+11.051	tr|Q5SYZ4|Q5SYZ4_HUMAN;sp|P29373|RABP2_HUMAN	31864666	7322599	66624968	18474170	149465168	85910016	0	FALSE
SK+4.025INVNEIFYDLVR+3.988	tr|F5GZG1|F5GZG1_HUMAN;tr|F5H823|F5H823_HUMAN;tr|B7ZB78|B7ZB78_HUMAN;sp|P62834|RAP1A_HUMAN;sp|P61224|RAP1B_HUMAN;sp|P61224-2|RAP1B_HUMAN;sp|P61224-3|RAP1B_HUMAN;sp|P61224-4|RAP1B_HUMAN;sp|A6NIZ1|RP1BL_HUMAN	32481386	10313667	60562472	7957973	62191692	124665712	0	FALSE
LESGM+15.995QNMSIHTK+4.025	sp|P05787|K2C8_HUMAN;sp|P05787-2|K2C8_HUMAN	16223070	3.47093e+06	28055006	6.65148e+06	23336164	52299160	0	FALSE
TMPILSPGNTQTLTELELK+8.050	tr|J3QLV0|J3QLV0_HUMAN;tr|J3QLD4|J3QLD4_HUMAN;tr|J3QL54|J3QL54_HUMAN;sp|Q9BW27|NUP85_HUMAN;sp|Q9BW27-2|NUP85_HUMAN;sp|Q9BW27-3|NUP85_HUMAN	3.6528e+06	282678	8809929	1.51148e+06	10422426	20009066	0	FALSE
GVNIGGAGSYIYEK+11.051PLAEGPQVTGPIEVPAAR+11.032	tr|H0YFA4|H0YFA4_HUMAN;sp|P52943|CRIP2_HUMAN;sp|P52943-2|CRIP2_HUMAN	6717184	0	5343810	0	2.74288e+06	11072939	0	FALSE
VFDLQFSTDSPR+11.032	tr|C9J470|C9J470_HUMAN;tr|C9JZP1|C9JZP1_HUMAN;tr|E9PHA2|E9PHA2_HUMAN;sp|Q15003|CND2_HUMAN	32637990	9116458	34237068	356257	45594256	81003408	0	FALSE
LM+15.995EPIYLVEIQC+57.021PEQVVGGIYGVLNR+3.988	sp|P13639|EF2_HUMAN	40032600	11351147	99324208	34943584	99808008	69093144	0	FALSE
K+1.994GAGSVFR+1.994	tr|G3V1A1|G3V1A1_HUMAN;tr|E9PKZ0|E9PKZ0_HUMAN;tr|E9PKU4|E9PKU4_HUMAN;tr|E9PP36|E9PP36_HUMAN;sp|P62917|RL8_HUMAN	168494384	81727496	409103968	29628934	351028320	580663296	0	FALSE
HK+1.994PLLIDMNK+1.994	tr|H0YDN1|H0YDN1_HUMAN;tr|E9PMV1|E9PMV1_HUMAN;tr|E9PKG0|E9PKG0_HUMAN;sp|Q15149|PLEC_HUMAN;sp|Q15149-2|PLEC_HUMAN;sp|Q15149-3|PLEC_HUMAN;sp|Q15149-4|PLEC_HUMAN;sp|Q15149-5|PLEC_HUMAN;sp|Q15149-6|PLEC_HUMAN;sp|Q15149-7|PLEC_HUMAN;sp|Q15149-8|PLEC_HUMAN;sp|Q15149-9|PLEC_HUMAN	23081444	8.07091e+06	52965604	13368945	51775204	118522504	0	FALSE
LYDLNHNEIGELIR+1.994	sp|O75643|U520_HUMAN	36059376	22484030	77511200	0	107456728	194852448	0	FALSE
SGDAAIVDMVPGK+4.025PMC+57.021VESFSDYPPLGR+3.988	tr|A0A087WVQ9|A0A087WVQ9_HUMAN;sp|Q5VTE0|EF1A3_HUMAN;sp|P68104|EF1A1_HUMAN;sp|P68104-2|EF1A1_HUMAN	14051531	10684785	33548730	2.7391e+06	24315138	51688520	0	FALSE
SSILLDVK+4.025PWDDETDM+15.995AK+4.025LEEC+57.021VR+3.988	sp|P24534|EF1B_HUMAN	28948562	12612338	56512404	13981196	44952428	115283728	0	FALSE
K+8.050K+8.050GDGGGAGGGGGGGGSGGGGSGGGGGGGSSR+9.038	sp|Q9UKM9|RALY_HUMAN;sp|Q9UKM9-2|RALY_HUMAN	37632.6	1.13434	0	3512.74	10427474	3.53215e+06	0.00100558	FALSE
HHIETGGGQLPAK+11.051	sp|Q92616|GCN1_HUMAN	13467978	4570846	32367268	7.98685e+06	25244020	45932580	0	FALSE
K+4.025GYEVIYLTEPVDEYC+57.021IQALPEFDGK+4.025R+3.988	sp|P14625|ENPL_HUMAN	87222616	48945884	266029216	28920102	225286800	352080832	0	FALSE
AAVPSGASTGIYEALELR+3.988DNDK+4.025TR+3.988	tr|K7ERS8|K7ERS8_HUMAN;tr|K7EM90|K7EM90_HUMAN;tr|A0A2R8Y798|A0A2R8Y798_HUMAN;tr|A0A2R8YEG5|A0A2R8YEG5_HUMAN;tr|A0A2R8Y879|A0A2R8Y879_HUMAN;tr|A0A2R8Y6G6|A0A2R8Y6G6_HUMAN;tr|A0A2R8YEM5|A0A2R8YEM5_HUMAN;sp|P06733|ENOA_HUMAN	1339739008	607506880	3469444864	487493856	3841283328	6704757760	0	FALSE
ITSAVWGPLGEC+57.021IIAGHESGELNQYSAK+1.994	sp|Q13347|EIF3I_HUMAN	3.92152e+06	3.81348e+06	3.71945e+06	10943616	5.39324e+06	12463847	0.000585995	FALSE
AEGAFTLQSVAQPMR+1.994	tr|F8WCR4|F8WCR4_HUMAN;tr|H0Y532|H0Y532_HUMAN;sp|Q13228-4|SBP1_HUMAN	32575762	14066016	25671868	48862924	0	4648522	0.00452352	FALSE
NFPNAIEHTLQWAR+1.994	sp|P22314|UBA1_HUMAN;sp|P22314-2|UBA1_HUMAN	19179352	16634637	70491072	806583	71118616	116782032	0	FALSE
LK+1.994EIYENMAPGENK+1.994R+1.994	tr|H7C2Q3|H7C2Q3_HUMAN;tr|C9JPC0|C9JPC0_HUMAN;sp|Q13200|PSMD2_HUMAN	18538894	6.2013e+06	49837168	3443155	39721520	92649336	0	FALSE
GGLQEVAEQLELER+1.994	sp|Q9UIV1|CNOT7_HUMAN;sp|Q9UIV1-2|CNOT7_HUMAN	13553335	5.34202e+06	28166982	4.97812e+06	32445278	40072236	0	FALSE
NVTELNEPLSNEER+1.994	sp|P61981|1433G_HUMAN	9172017	3.32191e+06	21457324	0	21454138	44770956	0	FALSE
LGPDDPNVAK+11.051	tr|G5E9S8|G5E9S8_HUMAN;tr|G3V3H3|G3V3H3_HUMAN;tr|G3V2E7|G3V2E7_HUMAN;tr|F8W6L3|F8W6L3_HUMAN;tr|A8MZ87|A8MZ87_HUMAN;tr|E7EVH7|E7EVH7_HUMAN;tr|G3V5R9|G3V5R9_HUMAN;sp|Q07866|KLC1_HUMAN;sp|Q07866-2|KLC1_HUMAN;sp|Q07866-3|KLC1_HUMAN;sp|Q07866-4|KLC1_HUMAN;sp|Q07866-5|KLC1_HUMAN;sp|Q07866-6|KLC1_HUMAN;sp|Q07866-7|KLC1_HUMAN;sp|Q07866-8|KLC1_HUMAN;sp|Q07866-9|KLC1_HUMAN;sp|Q07866-10|KLC1_HUMAN;sp|Q9H0B6…	22953736	7117773	39541480	39308764	49806160	79210592	0.000394536	FALSE
SFVWHALDYADELPK+4.025PEQLAIR+3.988	sp|P49792|RBP2_HUMAN	7395290	5.67046e+06	25717592	1.76842e+06	20540308	40732564	0	FALSE
SLADELALVDVLEDK+4.025LK+4.025GEMMDLQHGSLFLQTPK+4.025	tr|A0A3B3IS95|A0A3B3IS95_HUMAN;tr|A8MW50|A8MW50_HUMAN;tr|F5H793|F5H793_HUMAN;tr|C9J7H8|C9J7H8_HUMAN;sp|P07195|LDHB_HUMAN	2.651e+06	5438547	3.04686e+06	3.60314e+06	3.70001e+06	7081938	0	FALSE
FLEVIK+1.994PFC+57.021VILPEIQK+1.994PER+1.994	tr|B4DR61|B4DR61_HUMAN;sp|P61619|S61A1_HUMAN	16779280	4.18245e+06	22610240	3071562	35497092	80195736	0	FALSE
AK+11.051QIVWNGPVGVFEWEAFAR+11.032	sp|P00558|PGK1_HUMAN;sp|P00558-2|PGK1_HUMAN	8.05574e+06	13143572	59338824	5544667	58294408	114996368	0	FALSE
VIK+11.051DFM+15.995IQGGDFTR+11.032GDGTGGK+11.051	sp|P23284|PPIB_HUMAN	1.41528e+06	1.12629e+06	7.68325e+06	3.34214e+06	16146328	30469702	0.000829187	FALSE
YALQMEQLNGILLHLESELAQTR+3.988	tr|F8VZY9|F8VZY9_HUMAN;sp|P05783|K1C18_HUMAN	29056338	7084493	58551064	28938916	0	100051336	0	FALSE
FLPR+3.988EEGPYEVEVTYDGVPVPGSPFPLEAVAPTK+4.025PSK+4.025	tr|Q60FE5|Q60FE5_HUMAN;tr|A0A087WWY3|A0A087WWY3_HUMAN;sp|P21333|FLNA_HUMAN;sp|P21333-2|FLNA_HUMAN	4.17274e+06	0	6.58485e+06	0	7616554	18341880	0	FALSE
DEFEGLFK+8.050QPAENVNQYLTDPK+8.050	tr|Q5JRR6|Q5JRR6_HUMAN;sp|P22314|UBA1_HUMAN;sp|P22314-2|UBA1_HUMAN	28296820	16999962	68988096	11287796	51802148	90572944	0	FALSE
HIGLVYSGM+15.995GPDYR+1.994	tr|A0A024RA52|A0A024RA52_HUMAN;sp|P25787|PSA2_HUMAN	7424584	2.77042e+06	19525586	1.17232e+06	20120862	34566840	0	FALSE
GVVPLAGTDGETTTQGLDGLSER+11.032	tr|J3QKP5|J3QKP5_HUMAN;tr|K7EKH5|K7EKH5_HUMAN;tr|A8MVZ9|A8MVZ9_HUMAN;tr|C9J8F3|C9J8F3_HUMAN;tr|J3KSV6|J3KSV6_HUMAN;sp|P09972|ALDOC_HUMAN	42309936	12679875	76955656	11408014	65242800	129740864	0	FALSE
VYADGIFDLFHSGHAR+9.038	tr|H7C1T3|H7C1T3_HUMAN;tr|C9JEJ2|C9JEJ2_HUMAN;tr|C9J2E1|C9J2E1_HUMAN;tr|C9JPY0|C9JPY0_HUMAN;tr|C9JVS0|C9JVS0_HUMAN;tr|C9J050|C9J050_HUMAN;tr|F2Z2B1|F2Z2B1_HUMAN;tr|F8WAZ5|F8WAZ5_HUMAN;sp|P49585|PCY1A_HUMAN;sp|Q9Y5K3|PCY1B_HUMAN;sp|Q9Y5K3-2|PCY1B_HUMAN;sp|Q9Y5K3-3|PCY1B_HUMAN;sp|Q9Y5K3-4|PCY1B_HUMAN	5.61007e+06	1689203	10391550	678222	13683625	28972120	0	FALSE
GVGISVLEM+15.995SHR+3.988	sp|Q9Y617|SERC_HUMAN;sp|Q9Y617-2|SERC_HUMAN	12400968	36702988	25691700	0	1.69723e+06	2753661	0	FALSE
SGPFGQIFR+11.032PDNFVFGQSGAGNNWAK+11.051	tr|Q5ST81|Q5ST81_HUMAN;tr|Q5JP53|Q5JP53_HUMAN;tr|M0R1I1|M0R1I1_HUMAN;tr|M0QZL7|M0QZL7_HUMAN;tr|M0R278|M0R278_HUMAN;tr|M0QY85|M0QY85_HUMAN;sp|P04350|TBB4A_HUMAN;sp|P07437|TBB5_HUMAN;sp|Q13885|TBB2A_HUMAN;sp|P68371|TBB4B_HUMAN;sp|Q9BVA1|TBB2B_HUMAN	672084160	248004480	1535710848	361108672	1484930304	3185284864	0	FALSE
LMNNHQLELAK+11.051	tr|A0A1B0GVW6|A0A1B0GVW6_HUMAN;tr|A0A087WX43|A0A087WX43_HUMAN;tr|A0A096LNJ4|A0A096LNJ4_HUMAN;tr|D6RE84|D6RE84_HUMAN;tr|A0A087WTT9|A0A087WTT9_HUMAN;tr|A0A096LP10|A0A096LP10_HUMAN;sp|Q9NP73|ALG13_HUMAN;sp|Q9NP73-2|ALG13_HUMAN;sp|Q9NP73-3|ALG13_HUMAN	2.32152e+06	2.14001e+06	5.67537e+06	942724	8397402	37503456	0.00264236	FALSE
EVIAVSC+57.021GPAQC+57.021QETIR+1.994	sp|P38117|ETFB_HUMAN;sp|P38117-2|ETFB_HUMAN	21840596	8.32815e+06	53721632	1.93914e+06	54205060	77715448	0	FALSE
LK+1.994QQSELQSQVR+1.994	tr|C9J9W2|C9J9W2_HUMAN;sp|Q14847|LASP1_HUMAN;sp|Q14847-2|LASP1_HUMAN	36165216	16136578	80548240	16889146	69656608	160496592	0	FALSE
LVQAFQYTDK+8.050	tr|H7C3T4|H7C3T4_HUMAN;sp|Q13162|PRDX4_HUMAN	9082373	7.41927e+06	16440576	97262	20241606	61310024	0	FALSE
R+1.994NPDTQWITK+1.994PVHK+1.994	tr|E7EQV9|E7EQV9_HUMAN;tr|E7ENU7|E7ENU7_HUMAN;tr|A0A2R8YEM3|A0A2R8YEM3_HUMAN;sp|P61313|RL15_HUMAN	2.81379e+06	1.79439e+06	8083477	1.30405e+06	17216408	47679208	0.000394536	FALSE
GHEGPVWQVAWAHPM+15.995YGNILASC+57.021SYDR+9.038K+8.050	tr|E7ERC8|E7ERC8_HUMAN;tr|A8MXL6|A8MXL6_HUMAN;sp|P55735|SEC13_HUMAN;sp|P55735-2|SEC13_HUMAN;sp|P55735-3|SEC13_HUMAN;sp|P55735-4|SEC13_HUMAN	3766863	2.87912e+06	11962176	2880323	14121632	25708954	0.00131068	FALSE
HFVDSHHQK+1.994PVNAIIEHVR+1.994	sp|Q7KZF4|SND1_HUMAN	53499176	23138294	118670536	15999984	67705432	189061664	0	FALSE
VVGPQQLHSETNER+1.994	sp|Q9BSF4|TIM29_HUMAN	6016346	2.97064e+06	13845647	2.98136e+06	16464834	32447804	0	FALSE
LLEAAAQSTK+11.051	tr|H0YDN1|H0YDN1_HUMAN;sp|Q15149|PLEC_HUMAN;sp|Q15149-2|PLEC_HUMAN;sp|Q15149-3|PLEC_HUMAN;sp|Q15149-4|PLEC_HUMAN;sp|Q15149-5|PLEC_HUMAN;sp|Q15149-6|PLEC_HUMAN;sp|Q15149-7|PLEC_HUMAN;sp|Q15149-8|PLEC_HUMAN;sp|Q15149-9|PLEC_HUMAN	36658616	44715076	68540592	58549808	64096448	173491760	0.00209121	FALSE
QLENSLNEFGEK+4.025WELNSGDGAFYGPK+4.025	sp|P26639|SYTC_HUMAN;sp|P26639-2|SYTC_HUMAN	3.20833e+06	2317180	10133223	505113	203589	20250500	0	FALSE
SGDAAIVDMVPGK+4.025PMC+57.021VESFSDYPPLGR+3.988	tr|A0A087WVQ9|A0A087WVQ9_HUMAN;sp|Q5VTE0|EF1A3_HUMAN;sp|P68104|EF1A1_HUMAN;sp|P68104-2|EF1A1_HUMAN	12190666	7596365	30575902	9794894	26855056	52941452	0	FALSE
AR+11.032FEELNADLFR+11.032	tr|A8K7Q2|A8K7Q2_HUMAN;tr|E9PKE3|E9PKE3_HUMAN;tr|E9PNE6|E9PNE6_HUMAN;tr|E9PN89|E9PN89_HUMAN;sp|P54652|HSP72_HUMAN;sp|P11142|HSP7C_HUMAN;sp|P11142-2|HSP7C_HUMAN	22218742	35155812	25389840	2.49766e+06	23466056	63048644	0	FALSE
R+9.038FDEILEASDGIM+15.995VAR+9.038	tr|B4DNK4|B4DNK4_HUMAN;tr|H3BR70|H3BR70_HUMAN;tr|H3BTN5|H3BTN5_HUMAN;sp|P14618|KPYM_HUMAN;sp|P14618-2|KPYM_HUMAN;sp|P14618-3|KPYM_HUMAN	7.25859e+06	5.9566e+06	18486632	9379432	21307988	39582668	0	FALSE
EVWYFGLHYVDNK+11.051	tr|E7EQR4|E7EQR4_HUMAN;sp|P15311|EZRI_HUMAN	4990491	1.27485e+06	5895993	190009	8068951	9525315	0.000677179	FALSE
GLYGIK+11.051DDVFLSVPC+57.021ILGQNGISDLVK+11.051	sp|P00338|LDHA_HUMAN;sp|P00338-3|LDHA_HUMAN;sp|P00338-4|LDHA_HUMAN	73960296	59637732	223821408	101004152	194521248	400494592	0	FALSE
HILLAVANDEELNQLLK+4.025	tr|D6RCF2|D6RCF2_HUMAN;sp|Q9P0M6|H2AW_HUMAN;sp|O75367|H2AY_HUMAN;sp|O75367-2|H2AY_HUMAN;sp|O75367-3|H2AY_HUMAN	10108176	4842973	10663380	12474498	6.89503e+06	22314188	0	FALSE
K+1.994AHAAIR+1.994ENPVYEK+1.994	tr|A0A2R8Y4A2|A0A2R8Y4A2_HUMAN;tr|A0A2R8Y6J3|A0A2R8Y6J3_HUMAN;sp|P46777|RL5_HUMAN	17061590	8.19499e+06	44978536	3309788	32729374	68444080	0.000356979	FALSE
TLYVEEVVPNVIEPSFGLGR+9.038	sp|P41250|GARS_HUMAN	13036926	1.93314e+06	26070628	5230810	23700626	32292182	0	FALSE
VGMVETNSQDR+1.994PVDDVK+1.994	sp|Q9Y3C6|PPIL1_HUMAN	15830292	7964691	31645910	2418372	37962936	59239112	0	FALSE
FAEFQYLQPGPPR+3.988	tr|G3V119|G3V119_HUMAN;tr|E5RHJ4|E5RHJ4_HUMAN;tr|H0YB24|H0YB24_HUMAN;sp|Q8N163|CCAR2_HUMAN;sp|Q8N163-2|CCAR2_HUMAN	21747758	5.83823e+06	29750062	3129078	35648408	79363696	0	FALSE
NYLPAINGIVFLVDC+57.021ADHSR+11.032	tr|Q5SQT8|Q5SQT8_HUMAN;sp|Q9NR31|SAR1A_HUMAN;sp|Q9NR31-2|SAR1A_HUMAN	2.54928e+06	3120599	5.88519e+06	1.11313e+06	2.88501e+06	20356570	0	FALSE
GLSEDTTEETLK+8.050ESFDGSVR+9.038	tr|H7BY16|H7BY16_HUMAN;sp|P19338|NUCL_HUMAN	265133	253637	464813	505155	1495641	2.76685e+06	0.000106883	FALSE
INPYMSSPC+57.021HIEMILTEK+4.025EQIVPK+4.025PEEEVAQK+4.025	tr|J3QQT2|J3QQT2_HUMAN;tr|A0A087WXM6|A0A087WXM6_HUMAN;tr|A0A0A0MRF8|A0A0A0MRF8_HUMAN;tr|A0A0A6YYL6|A0A0A6YYL6_HUMAN;tr|J3QLC8|J3QLC8_HUMAN;tr|J3KRX5|J3KRX5_HUMAN;sp|P18621|RL17_HUMAN;sp|P18621-2|RL17_HUMAN;sp|P18621-3|RL17_HUMAN	91671944	53912712	207015264	39191056	169992464	330283296	0.000394536	FALSE
ALNALC+57.021DGLIDELNQALK+4.025	sp|P30084|ECHM_HUMAN	28954636	14500124	56910840	9308196	44860092	82411752	0	FALSE
MFVGGLSWDTSK+4.025K+4.025	tr|D6R9P3|D6R9P3_HUMAN;tr|D6RBZ0|D6RBZ0_HUMAN;tr|D6RD18|D6RD18_HUMAN;sp|Q99729|ROAA_HUMAN;sp|Q99729-2|ROAA_HUMAN;sp|Q99729-3|ROAA_HUMAN;sp|Q99729-4|ROAA_HUMAN	31888716	13280552	76457080	7.4274e+06	74698440	142776608	0	FALSE
K+1.994VNVTVDYIR+1.994PASPATETVPAFSER+1.994	sp|Q7KZF4|SND1_HUMAN	55078224	19010946	124547936	8760084	87326416	192602400	0.000356979	FALSE
SSILLDVK+8.050PWDDETDM+15.995AK+8.050LEEC+57.021VR+9.038	sp|P24534|EF1B_HUMAN	15935220	0	30532938	3.73394e+06	24221854	45292160	0	FALSE
R+11.032VFIM+15.995DNC+57.021EELIPEYLNFIR+11.032	sp|P07900|HS90A_HUMAN;sp|P07900-2|HS90A_HUMAN	2.32367e+06	3.71496e+06	3.40766e+06	14029603	8.10035e+06	7995771	0.000394536	FALSE
DGVYFLYEALHGPPK+11.051K+11.051	sp|P30520|PURA2_HUMAN	8454178	4503451	14800219	4991974	19538966	32744470	0	FALSE
ILNPEEIEK+4.025YVAEIEK+4.025EK+4.025EENEK+4.025	tr|H0Y586|H0Y586_HUMAN;sp|O14818|PSA7_HUMAN;sp|O14818-2|PSA7_HUMAN	19659292	8.01075e+06	45757408	1.35593e+06	39119648	75526752	0	FALSE
IFLDESAPDNVLEVTAR+11.032	tr|G3V4V5|G3V4V5_HUMAN;tr|A0A087X2H1|A0A087X2H1_HUMAN;sp|Q9ULT8|HECD1_HUMAN	7.07362e+06	1.82329e+06	8093769	0	17493328	36961000	0	FALSE
TENNDHINLK+8.050	sp|P61956|SUMO2_HUMAN;sp|P61956-2|SUMO2_HUMAN	8714403	4.13861e+06	16330177	6.06667e+06	16124534	29132682	0	FALSE
NLDLSWSELK+4.025K+4.025	tr|G3V198|G3V198_HUMAN;tr|E9PR16|E9PR16_HUMAN;sp|Q12769|NU160_HUMAN;sp|Q12769-3|NU160_HUMAN	7.07792e+06	4.15159e+06	21397340	508429	25345226	50021896	0	FALSE
VGTGEPC+57.021C+57.021DWVGDEGAGHFVK+11.051	tr|K7EM49|K7EM49_HUMAN;tr|K7EPF6|K7EPF6_HUMAN;sp|P52209|6PGD_HUMAN;sp|P52209-2|6PGD_HUMAN	10215964	6805539	20712836	1.59086e+06	22679742	32067608	0	FALSE
K+4.025GGPSPGDVEAIK+4.025NAIANASTLAEVER+3.988	tr|H0YMA0|H0YMA0_HUMAN;tr|H0YLR3|H0YLR3_HUMAN;sp|P09661|RU2A_HUMAN	19194554	12603217	43622520	7239099	43705296	84542712	0	FALSE
SGK+4.025TELAEPIAIR+3.988PTSETVM+15.995YPAYAK+4.025	sp|P07814|SYEP_HUMAN	6265417	4708060	20689846	0	23006318	29281742	0	FALSE
SFTPDHVVYAR+3.988	sp|Q6NZI2|CAVN1_HUMAN;sp|Q6NZI2-2|CAVN1_HUMAN;sp|Q6NZI2-3|CAVN1_HUMAN	6.27438e+06	1350073	10671222	4548488	12728486	25970206	0	FALSE
DGNASGTTLLEALDC+57.021ILPPTR+1.994PTDK+1.994PLR+1.994LPLQDVYK+1.994	tr|A0A087WV01|A0A087WV01_HUMAN;tr|A0A087WVQ9|A0A087WVQ9_HUMAN;sp|Q5VTE0|EF1A3_HUMAN;sp|P68104|EF1A1_HUMAN;sp|P68104-2|EF1A1_HUMAN	27682954	17047310	80649000	13906353	67869280	112350208	0	FALSE
IC+57.021ELLPEAAINDVYLAPLLQC+57.021LIEGLSAEPR+1.994	tr|J3QKQ5|J3QKQ5_HUMAN;tr|J3KTM9|J3KTM9_HUMAN;sp|Q14974|IMB1_HUMAN;sp|Q14974-2|IMB1_HUMAN	31455306	1420572	21758134	36713148	6.55211e+06	49385356	0.000677179	FALSE
TR+11.032EGNDLYHEMIESGVINLK+11.051	tr|F8W0P7|F8W0P7_HUMAN;tr|F8W079|F8W079_HUMAN;tr|H0YH81|H0YH81_HUMAN;tr|H0YI37|H0YI37_HUMAN;sp|P06576|ATPB_HUMAN	680493	0	512142	0	895154	2.61129e+06	0.000585995	FALSE
AEPPK+11.051APEQEQAAPGPAAGGEAPK+11.051	sp|P80723|BASP1_HUMAN	23635082	5.13443e+06	27042952	9251739	32565294	62397712	0	FALSE
AFTGFIVEADTPGIQIGR+3.988	tr|Q5T4U5|Q5T4U5_HUMAN;tr|B7Z9I1|B7Z9I1_HUMAN;sp|P11310|ACADM_HUMAN;sp|P11310-2|ACADM_HUMAN	12522980	8.10613e+06	31105556	961615	29595732	35899500	0	FALSE
TGTQEVGGQDPGEAVQPC+57.021R+3.988QPLGAR+3.988	tr|A0A0A0MRN5|A0A0A0MRN5_HUMAN;sp|Q9NZT2|OGFR_HUMAN;sp|Q9NZT2-2|OGFR_HUMAN	1292323	1.67543e+06	14931732	0	11831132	17882732	0.000106883	FALSE
GEGYAK+4.025PNEGAIVEVALEGYYK+4.025DK+4.025LFDQR+3.988	sp|Q02790|FKBP4_HUMAN	15715242	10133412	18733738	5317994	16841082	25697708	0	FALSE
GHPDLQGQPAEEIFESVGDR+3.988ELR+3.988	sp|P49257|LMAN1_HUMAN	8542061	3.49017e+06	48276972	18235694	60359584	112489816	0.000585995	FALSE
MQASIEK+4.025	sp|P06748|NPM_HUMAN;sp|P06748-2|NPM_HUMAN;sp|P06748-3|NPM_HUMAN	86691328	34957276	226794128	8452486	162545856	326515488	0	FALSE
LDC+57.021QVQGR+1.994PQPEVTWR+1.994	sp|P32004|L1CAM_HUMAN;sp|P32004-2|L1CAM_HUMAN;sp|P32004-3|L1CAM_HUMAN	23495196	16261963	64046764	2.59895e+06	81931296	140007648	0	FALSE
MEELHNQEVQK+11.051	tr|H7C367|H7C367_HUMAN;tr|C9JYS8|C9JYS8_HUMAN;sp|Q15233|NONO_HUMAN;sp|Q15233-2|NONO_HUMAN	13922935	6.42331e+06	16707757	2282246	23152350	53389784	0	FALSE
K+8.050GYEVIYLTEPVDEYC+57.021IQALPEFDGK+8.050R+9.038	sp|P14625|ENPL_HUMAN	20517854	9842710	57386588	5.20175e+06	48172032	79274888	0	FALSE
LM+15.995EPIYLVEIQC+57.021PEQVVGGIYGVLNR+9.038K+8.050	sp|P13639|EF2_HUMAN	8648703	6.34707e+06	19301450	2.21504e+06	17349922	29617846	0	FALSE
ILYSQC+57.021GDVMR+9.038	tr|G3V1V0|G3V1V0_HUMAN;tr|B7Z6Z4|B7Z6Z4_HUMAN;tr|J3KND3|J3KND3_HUMAN;tr|F8W1R7|F8W1R7_HUMAN;tr|G8JLA2|G8JLA2_HUMAN;tr|F8W1I5|F8W1I5_HUMAN;tr|F8VPF3|F8VPF3_HUMAN;sp|P60660|MYL6_HUMAN;sp|P60660-2|MYL6_HUMAN;sp|P14649|MYL6B_HUMAN	140458992	53096336	332122304	8949176	342767840	604134208	0	FALSE
STMMTQEQIQK+11.051EYDALVK+11.051	tr|E7EW20|E7EW20_HUMAN;tr|A0A0A0MRM8|A0A0A0MRM8_HUMAN;tr|A0A0D9SGC1|A0A0D9SGC1_HUMAN;sp|Q9UM54|MYO6_HUMAN;sp|Q9UM54-1|MYO6_HUMAN;sp|Q9UM54-2|MYO6_HUMAN;sp|Q9UM54-4|MYO6_HUMAN;sp|Q9UM54-5|MYO6_HUMAN;sp|Q9UM54-6|MYO6_HUMAN	0	2327162	13852367	0	10957396	29959424	0	FALSE
TPAQFDADELR+11.032AAMK+11.051	tr|Q5T3N1|Q5T3N1_HUMAN;sp|P04083|ANXA1_HUMAN	21969206	4.81631e+06	33792536	177950	43167816	76939176	0	FALSE
YDDMAAC+57.021MK+8.050	tr|E9PD24|E9PD24_HUMAN;tr|E7ESK7|E7ESK7_HUMAN;tr|E5RGE1|E5RGE1_HUMAN;tr|E5RIR4|E5RIR4_HUMAN;tr|E7EVZ2|E7EVZ2_HUMAN;tr|E7EX29|E7EX29_HUMAN;sp|P63104|1433Z_HUMAN	3008147	1.04216e+06	8788986	1.18841e+06	5291246	14946386	0	FALSE
IGR+3.988DQELYFFHELSPGSC+57.021FFLPK+4.025	sp|P26639|SYTC_HUMAN;sp|P26639-2|SYTC_HUMAN	12891812	17951154	12447365	3.65209e+06	11815235	10480983	0	FALSE
TSAADLVTETDHLVEDLIISELR+3.988ER+3.988	tr|Q6PIP6|Q6PIP6_HUMAN;tr|K7EL65|K7EL65_HUMAN;tr|K7ELF8|K7ELF8_HUMAN;sp|O14732|IMPA2_HUMAN;sp|O14732-2|IMPA2_HUMAN	5559141	1.0862e+06	8.37603e+06	2.54155e+06	7.29968e+06	13055540	0.000829187	FALSE
VIQEGR+3.988GELPDFQDGTK+4.025	tr|E9PMH2|E9PMH2_HUMAN;sp|O00170|AIP_HUMAN	25172034	181703408	4469920	678311	5.37297e+06	26266704	0	FALSE
LQEEM+15.995LQR+11.032EEAENTLQSFR+11.032	tr|B0YJC4|B0YJC4_HUMAN;tr|B0YJC5|B0YJC5_HUMAN;sp|P08670|VIME_HUMAN	39041988	9448385	36057164	3665467	27618614	73137344	0	FALSE
IHVFYIDYGNR+11.032	sp|Q7KZF4|SND1_HUMAN	40147776	35007304	96654648	37447968	80752736	150554672	0	FALSE
IEFEGQPVDFVDPNK+4.025QNLIAEVSTK+4.025DVK+4.025	tr|Q5R211|Q5R211_HUMAN;sp|P31327|CPSM_HUMAN;sp|P31327-3|CPSM_HUMAN	30830992	13977304	73619960	10740636	76300456	100972024	0	FALSE
SSGFLPASQQAC+57.021AK+8.050	tr|H7C008|H7C008_HUMAN;sp|Q6NUQ4|TM214_HUMAN;sp|Q6NUQ4-2|TM214_HUMAN	19654432	5651238	36651544	5286580	35198500	66726636	0	FALSE
VIPEDGPAAQNPENVK+4.025R+3.988	tr|E9PDF2|E9PDF2_HUMAN;tr|A0A0D9SFS3|A0A0D9SFS3_HUMAN;tr|E9PCR7|E9PCR7_HUMAN;tr|E9PFG7|E9PFG7_HUMAN;sp|Q02218|ODO1_HUMAN;sp|Q02218-2|ODO1_HUMAN	25195484	10034957	43722344	3.81037e+06	48778812	81717168	0	FALSE
DATNVGDEGGFAPNILENK+4.025EGLELLK+4.025	tr|A0A2R8Y6G6|A0A2R8Y6G6_HUMAN;sp|P06733|ENOA_HUMAN;sp|P06733-2|ENOA_HUMAN	21548252	6.64556e+06	41291140	13638878	36967308	55184008	0	FALSE
ASLEAAIADAEQR+3.988GELAIK+4.025DANAK+4.025LSELEAALQR+3.988	sp|P05787|K2C8_HUMAN;sp|P05787-2|K2C8_HUMAN	5831045	4.56694e+06	19495842	3.92192e+06	13717304	17077844	0.000541392	FALSE
HTNYTM+15.995EHIR+11.032	tr|F6THM6|F6THM6_HUMAN;tr|H9KV75|H9KV75_HUMAN;tr|H7C5W8|H7C5W8_HUMAN;tr|H0YJ11|H0YJ11_HUMAN;tr|H7C144|H7C144_HUMAN;tr|H0YJW3|H0YJW3_HUMAN;tr|F5GXS2|F5GXS2_HUMAN;sp|P12814|ACTN1_HUMAN;sp|P12814-2|ACTN1_HUMAN;sp|P12814-3|ACTN1_HUMAN;sp|P12814-4|ACTN1_HUMAN;sp|O43707|ACTN4_HUMAN;sp|O43707-2|ACTN4_HUMAN;sp|O43707-3|ACTN4_HUMAN;sp|P35609|ACTN2_HUMAN;sp|P35609-2|ACTN2_HUMAN	10831171	25030568	19435126	14687578	3.18674e+06	14823611	0.0030226	FALSE
YIAENGTDPINNQPLSEEQLIDIK+1.994	tr|F5GY56|F5GY56_HUMAN;sp|Q9UMS4|PRP19_HUMAN	10535739	17452402	14957533	15868726	22943758	72622760	0.000677179	FALSE
YVATLGVEVHPLVFHTNR+3.988	tr|B5MDF5|B5MDF5_HUMAN;tr|F5H018|F5H018_HUMAN;tr|J3KQE5|J3KQE5_HUMAN;tr|H0YFC6|H0YFC6_HUMAN;sp|P62826|RAN_HUMAN	161832592	51352072	322694112	11055711	283773696	509241280	0	FALSE
LQQFFNER+11.032	tr|E7EW20|E7EW20_HUMAN;tr|A0A0A0MRM8|A0A0A0MRM8_HUMAN;tr|A0A0D9SGC1|A0A0D9SGC1_HUMAN;sp|Q9UM54|MYO6_HUMAN;sp|Q9UM54-1|MYO6_HUMAN;sp|Q9UM54-2|MYO6_HUMAN;sp|Q9UM54-4|MYO6_HUMAN;sp|Q9UM54-5|MYO6_HUMAN;sp|Q9UM54-6|MYO6_HUMAN	9918469	5739581	11420232	0	131745336	41020824	0.000209315	FALSE
AR+11.032PFPDGLAEDIDK+11.051GEVSAR+11.032QELK+11.051	sp|P13639|EF2_HUMAN	59956420	26260918	134474976	15220746	146235024	271134816	0	FALSE
GGPEVQQVPAGER+1.994PLWFIC+57.021SGMGTQWR+1.994	tr|A0A0U1RQF0|A0A0U1RQF0_HUMAN;sp|P49327|FAS_HUMAN	41796368	35459532	102900144	10306855	68654992	92878144	0	FALSE
ILNPEEIEK+4.025YVAEIEK+4.025EK+4.025EENEK+4.025	tr|H0Y586|H0Y586_HUMAN;sp|O14818|PSA7_HUMAN;sp|O14818-2|PSA7_HUMAN	19601006	7.93466e+06	45623176	1.35801e+06	39333316	76026768	0	FALSE
IGFFNQQYAEQLR+3.988	tr|H0YGW7|H0YGW7_HUMAN;sp|Q8NE71|ABCF1_HUMAN;sp|Q8NE71-2|ABCF1_HUMAN	23003988	15787144	52675656	33196902	50390088	97794264	0	FALSE
K+1.994GEK+1.994DIPGLTDTTVPR+1.994	tr|A2A3R5|A2A3R5_HUMAN;sp|P62753|RS6_HUMAN	30186372	13204854	54517416	1.80788e+06	45771808	100960280	0.000106883	FALSE
TETQEK+8.050NPLPSK+8.050ETIEQEK+8.050	sp|P62328|TYB4_HUMAN	42025692	16676752	94466928	7747922	75917224	155147936	0	FALSE
SGPFGQIFR+3.988PDNFVFGQSGAGNNWAK+4.025	tr|Q5ST81|Q5ST81_HUMAN;tr|Q5JP53|Q5JP53_HUMAN;tr|M0R1I1|M0R1I1_HUMAN;tr|M0QZL7|M0QZL7_HUMAN;tr|M0R278|M0R278_HUMAN;tr|M0QY85|M0QY85_HUMAN;sp|P04350|TBB4A_HUMAN;sp|P07437|TBB5_HUMAN;sp|Q13885|TBB2A_HUMAN;sp|P68371|TBB4B_HUMAN;sp|Q9BVA1|TBB2B_HUMAN	672284672	464653792	1503210112	511903712	1705689344	3134967552	0	FALSE
IMWSQR+1.994DPSLR+1.994	tr|B1ANR0|B1ANR0_HUMAN;tr|B1ANR1|B1ANR1_HUMAN;tr|E7EQV3|E7EQV3_HUMAN;tr|E5RJB9|E5RJB9_HUMAN;tr|E5RGH3|E5RGH3_HUMAN;tr|A0A087WTT1|A0A087WTT1_HUMAN;tr|H0YEQ8|H0YEQ8_HUMAN;tr|E5RH24|E5RH24_HUMAN;tr|E7ERJ7|E7ERJ7_HUMAN;sp|Q5JQF8|PAP1M_HUMAN;sp|Q13310|PABP4_HUMAN;sp|Q13310-2|PABP4_HUMAN;sp|Q13310-3|PABP4_HUMAN;sp|P11940|PABP1_HUMAN;sp|P11940-2|PABP1_HUMAN;sp|Q9H361|PABP3_HUMAN	12538577	6061533	29143066	3.19281e+06	36160760	73343696	0.000394536	FALSE
LGVHPLSC+57.021HGWVLGEHGDSSVPVWSGM+15.995NVAGVSLK+11.051	sp|P00338|LDHA_HUMAN;sp|P00338-2|LDHA_HUMAN;sp|P00338-3|LDHA_HUMAN;sp|P00338-4|LDHA_HUMAN;sp|P00338-5|LDHA_HUMAN	43121264	0	91949776	16624127	90519736	163674208	0.00264236	FALSE
MLADEFGTASNIK+8.050	tr|I3L492|I3L492_HUMAN;tr|D6RJE8|D6RJE8_HUMAN;tr|B7Z7P8|B7Z7P8_HUMAN;tr|D6RCB3|D6RCB3_HUMAN;sp|P62495|ERF1_HUMAN;sp|P62495-2|ERF1_HUMAN	4556808	0	4.86183e+06	0	43022800	113765728	0	FALSE
INPYM+15.995SSPC+57.021HIEMILTEK+11.051EQIVPK+11.051PEEEVAQK+11.051	tr|J3QQT2|J3QQT2_HUMAN;tr|A0A087WXM6|A0A087WXM6_HUMAN;tr|A0A0A0MRF8|A0A0A0MRF8_HUMAN;tr|A0A0A6YYL6|A0A0A6YYL6_HUMAN;tr|J3QLC8|J3QLC8_HUMAN;tr|J3KRX5|J3KRX5_HUMAN;sp|P18621|RL17_HUMAN;sp|P18621-2|RL17_HUMAN;sp|P18621-3|RL17_HUMAN	9745724	9863286	28264990	0	24788898	45569804	0	FALSE
MK+8.050EIAEAYLGYPVTNAVITVPAYFNDSQR+9.038	tr|A0A0G2JIW1|A0A0G2JIW1_HUMAN;sp|P0DMV9|HS71B_HUMAN;sp|P0DMV8|HS71A_HUMAN	17385192	12957132	7802899	10698253	27806698	11941481	0	FALSE
ASEPGLAQLLVDQIYENAMIAAGLVDDPR+3.988	tr|I3L253|I3L253_HUMAN;tr|I3L0K7|I3L0K7_HUMAN;sp|Q12931|TRAP1_HUMAN;sp|Q12931-2|TRAP1_HUMAN	3.84685e+06	1.11771e+06	7.27908e+06	1370661	6.72302e+06	12086632	0	FALSE
LHQEYVPSAHLSGTC+57.021TC+57.021LAWAPAR+11.032	sp|Q15061|WDR43_HUMAN	11129403	0	14151326	0	6.26986e+06	13543115	0	FALSE
FAFVEFADQNSVPR+11.032	sp|Q8WXA9|SREK1_HUMAN;sp|Q8WXA9-2|SREK1_HUMAN	1.50909e+06	4.59321e+06	4244552	18440618	8667464	16059291	0	FALSE
VSQGQLVVM+15.995QPEK+8.050	sp|P13667|PDIA4_HUMAN	2.93631e+06	1.63447e+06	8814716	310860	10359987	28561346	0	FALSE
SGSK+11.051FPVFNM+15.995SYNPAENAVLLC+57.021TR+11.032	tr|A0A3B3IS84|A0A3B3IS84_HUMAN;tr|A0A3B3IT15|A0A3B3IT15_HUMAN;tr|A0A3B3ISK1|A0A3B3ISK1_HUMAN;tr|A0A3B3IU89|A0A3B3IU89_HUMAN;tr|A0A3B3ISC6|A0A3B3ISC6_HUMAN;tr|A0A3B3ITV3|A0A3B3ITV3_HUMAN;sp|P53621|COPA_HUMAN;sp|P53621-2|COPA_HUMAN	4572777	3402166	9083966	5.22623e+06	16806782	25822610	0	FALSE
M+15.995QHLNPDPQLIPEQITTDITPEC+57.021LVSPR+9.038	tr|A0A0U1RRM8|A0A0U1RRM8_HUMAN;tr|H0YJ34|H0YJ34_HUMAN;tr|H0YJB6|H0YJB6_HUMAN;sp|Q96AC1|FERM2_HUMAN;sp|Q96AC1-2|FERM2_HUMAN;sp|Q96AC1-3|FERM2_HUMAN	6.05633e+06	729648	12202315	6273880	8.01227e+06	21671414	0	FALSE
YLTAEETDK+8.050IINYLR+9.038	sp|Q9HCD5|NCOA5_HUMAN	3.66609e+06	4280346	17562674	1.62456e+06	17266874	39861400	0	FALSE
ADGYVLEGK+11.051	tr|Q5JR95|Q5JR95_HUMAN;sp|P62241|RS8_HUMAN	63689172	13803923	116254776	9858630	113127352	215892752	0	FALSE
NVFDEAILAALEPPEPK+8.050K+8.050	sp|P60953|CDC42_HUMAN	4.71425e+06	2.41825e+06	8.32496e+06	3.04511e+06	9598157	22122630	0	FALSE
LVEK+8.050PSPLTLAPHDFANIK+8.050	sp|P53618|COPB_HUMAN	10510073	3.15534e+06	42586576	29291774	35421212	66769340	0	FALSE
VK+4.025YETELAM+15.995R+3.988	tr|F8VZY9|F8VZY9_HUMAN;sp|P05783|K1C18_HUMAN	1511365248	8716291	75519272	8845446	57255444	133175232	0	FALSE
VTGEVLDILTR+1.994LPESVER+1.994	tr|A0A140T974|A0A140T974_HUMAN;tr|A0A140T9W4|A0A140T9W4_HUMAN;tr|A0A140T9R1|A0A140T9R1_HUMAN;sp|O75955|FLOT1_HUMAN;sp|O75955-2|FLOT1_HUMAN	22797826	13673968	50161304	3.77721e+06	50657820	98723456	0	FALSE
MK+8.050DTDSEEEIR+9.038EAFR+9.038	tr|Q96HY3|Q96HY3_HUMAN;tr|G3V361|G3V361_HUMAN;tr|H0Y7A7|H0Y7A7_HUMAN;tr|E7EMB3|E7EMB3_HUMAN;tr|G3V226|G3V226_HUMAN;tr|E7ETZ0|E7ETZ0_HUMAN;sp|P0DP25|CALM3_HUMAN;sp|P0DP23|CALM1_HUMAN;sp|P0DP24|CALM2_HUMAN	6922591	4259548	14380138	0	16884318	30525694	0	FALSE
QVLVAPGNAGTAC+57.021SEK+1.994	tr|C9JKQ7|C9JKQ7_HUMAN;tr|C9JZG2|C9JZG2_HUMAN;tr|C9JBJ1|C9JBJ1_HUMAN;tr|C9JTV6|C9JTV6_HUMAN;tr|F8WD69|F8WD69_HUMAN;sp|P22102|PUR2_HUMAN;sp|P22102-2|PUR2_HUMAN	47633432	5868245	37537124	9229651	42611512	61794564	0	FALSE
TVWDWELMNDIK+11.051PIWQR+11.032PSK+11.051EVEEDEYK+11.051	sp|P14625|ENPL_HUMAN	6.76759e+06	3.69528e+06	23695714	4925262	18194736	27034130	0	FALSE
IVSGK+4.025DYNVTANSK+4.025	tr|F5GXY2|F5GXY2_HUMAN;tr|F5GXH2|F5GXH2_HUMAN;tr|F5GYU2|F5GYU2_HUMAN;sp|P00338|LDHA_HUMAN;sp|P00338-2|LDHA_HUMAN;sp|P00338-3|LDHA_HUMAN;sp|P00338-5|LDHA_HUMAN	4.3136e+06	4045610	11936511	556864	6963924	17360682	0	FALSE
YGTDLSR+11.032	tr|Q5TC02|Q5TC02_HUMAN;tr|Q5TC01|Q5TC01_HUMAN;sp|P05023|AT1A1_HUMAN;sp|P05023-2|AT1A1_HUMAN;sp|P05023-3|AT1A1_HUMAN;sp|P05023-4|AT1A1_HUMAN	55996572	33195052	111044368	6889957	307904736	232597296	0	FALSE
VHSPSGALEEC+57.021YVTEIDQDK+8.050YAVR+9.038	tr|Q60FE5|Q60FE5_HUMAN;tr|A0A087WWY3|A0A087WWY3_HUMAN;sp|P21333|FLNA_HUMAN;sp|P21333-2|FLNA_HUMAN	22938830	11341654	70989120	8188688	61664268	121773472	0	FALSE
DINAYNC+57.021EEPTEK+4.025LPFPIIDDR+3.988	sp|P30041|PRDX6_HUMAN	87319720	51929152	219648880	25415248	165322000	292696032	0	FALSE
IVTDR+3.988ETGSSK+4.025	tr|H7BY16|H7BY16_HUMAN;sp|P19338|NUCL_HUMAN	114087408	46740500	265694576	29143964	250591120	439289632	0	FALSE
ELQNAPDAIPESGVEPPALDTAWVEATR+9.038	tr|C9JFE4|C9JFE4_HUMAN;tr|A8K070|A8K070_HUMAN;tr|A0A096LP07|A0A096LP07_HUMAN;tr|J3KRJ4|J3KRJ4_HUMAN;tr|J3KTB0|J3KTB0_HUMAN;tr|J3KSA5|J3KSA5_HUMAN;tr|J3QLT0|J3QLT0_HUMAN;tr|J3QS88|J3QS88_HUMAN;tr|A0A096LPJ3|A0A096LPJ3_HUMAN;sp|Q13098|CSN1_HUMAN;sp|Q13098-5|CSN1_HUMAN;sp|Q13098-7|CSN1_HUMAN	14801256	1.9562e+06	28954338	10020490	23385596	46736708	0	FALSE
IEYDTFGELK+1.994VPNDK+1.994YYGAQTVR+1.994	sp|P07954|FUMH_HUMAN;sp|P07954-2|FUMH_HUMAN	76184216	32883666	178283664	19992516	180641184	284618528	0	FALSE
VFQVEYAM+15.995K+11.051	tr|G3V5N4|G3V5N4_HUMAN;tr|G3V3W4|G3V3W4_HUMAN;sp|P25788|PSA3_HUMAN;sp|P25788-2|PSA3_HUMAN	18038534	4591950	33076104	1233205	32789294	72743384	0	FALSE
VEPSDR+9.038YPQC+57.021LC+57.021LSPTYELALQTGK+8.050	tr|I3L352|I3L352_HUMAN;tr|I3L0H8|I3L0H8_HUMAN;tr|F6QDS0|F6QDS0_HUMAN;sp|Q9NUU7|DD19A_HUMAN;sp|Q9NUU7-2|DD19A_HUMAN	38173352	21005014	86413752	12606993	85177440	162176480	0	FALSE
AIEVGR+1.994ENR+1.994EDYR+1.994	sp|P31948|STIP1_HUMAN;sp|P31948-2|STIP1_HUMAN;sp|P31948-3|STIP1_HUMAN	48134016	21054690	104927280	12805950	90617096	172098288	0.00209121	FALSE
K+4.025NNFSDTGNFGFGIQEHIDLGIK+4.025	tr|Q5VVC8|Q5VVC8_HUMAN;sp|P62913|RL11_HUMAN;sp|P62913-2|RL11_HUMAN	3.71178e+06	3.43854e+06	16218925	2.24757e+06	10320707	23035464	0	FALSE
FLEQVHQLYDDSFPMEIR+11.032	tr|J3KPM9|J3KPM9_HUMAN;tr|E7ENM1|E7ENM1_HUMAN;tr|E7EPD2|E7EPD2_HUMAN;tr|E9PH66|E9PH66_HUMAN;tr|D2KFR9|D2KFR9_HUMAN;sp|P42224|STAT1_HUMAN;sp|P42224-2|STAT1_HUMAN	4.04315e+06	3.18717e+06	10055539	866049	13210645	25620902	0	FALSE
IIAFVGSPVEDNEK+11.051DLVK+11.051	tr|A6PVX3|A6PVX3_HUMAN;tr|Q5VWC4|Q5VWC4_HUMAN;sp|P55036|PSMD4_HUMAN;sp|P55036-2|PSMD4_HUMAN	4.17063e+06	1.83686e+06	21154376	3.66338e+06	18443998	36117192	0	FALSE
VIEINPYLLGTM+15.995AGGAADC+57.021SFWER+11.032	tr|H0YJM8|H0YJM8_HUMAN;sp|P28074|PSB5_HUMAN;sp|P28074-2|PSB5_HUMAN	0	3.15651e+06	8548824	6.82416e+06	9657488	8.02894e+06	0	FALSE
VTPDTDWAR+11.032	tr|K7ESG8|K7ESG8_HUMAN;sp|P53396|ACLY_HUMAN;sp|P53396-2|ACLY_HUMAN;sp|P53396-3|ACLY_HUMAN	27300040	14598970	38992212	3891251	31076210	46138412	0	FALSE
VTGSLETK+4.025	tr|C9JI87|C9JI87_HUMAN;sp|P21796|VDAC1_HUMAN	94079304	23681386	212784960	13532920	181488096	333867744	0	FALSE
DAGIEPGPDTYLALLNAYAEK+4.025GDIDHVK+4.025QTLEK+4.025VEK+4.025	tr|C9JCA9|C9JCA9_HUMAN;tr|B8ZZ38|B8ZZ38_HUMAN;tr|A0A0C4DG06|A0A0C4DG06_HUMAN;sp|P42704|LPPRC_HUMAN	6417044	685239	16123392	2.16565e+06	21229904	30406862	0	FALSE
INPYM+15.995SSPC+57.021HIEMILTEK+4.025EQIVPK+4.025PEEEVAQK+4.025	tr|J3QQT2|J3QQT2_HUMAN;tr|A0A087WXM6|A0A087WXM6_HUMAN;tr|A0A0A0MRF8|A0A0A0MRF8_HUMAN;tr|A0A0A6YYL6|A0A0A6YYL6_HUMAN;tr|J3QLC8|J3QLC8_HUMAN;tr|J3KRX5|J3KRX5_HUMAN;sp|P18621|RL17_HUMAN;sp|P18621-2|RL17_HUMAN;sp|P18621-3|RL17_HUMAN	10452804	9528249	27992298	0	26160072	43664000	0	FALSE
DGIEPGHIPGTVNIPFTDFLSQEGLEK+4.025SPEEIR+3.988	sp|P25325|THTM_HUMAN;sp|P25325-2|THTM_HUMAN	4634474	4.72019e+06	15270766	1.06751	9329076	21861990	0	FALSE
INK+4.025GVATNWLR+3.988	tr|E7EMD0|E7EMD0_HUMAN;tr|H0Y4R2|H0Y4R2_HUMAN;sp|P16435|NCPR_HUMAN	16335643	10173599	36328876	2.82766e+06	36820912	68595120	0	FALSE
STPTDLILC+57.021VPHLYSC+57.021LEDR+11.032NGDVR+11.032	sp|Q14008|CKAP5_HUMAN;sp|Q14008-2|CKAP5_HUMAN;sp|Q14008-3|CKAP5_HUMAN	7141028	12274374	19406104	6.60642e+06	29079528	53359820	0.00293757	FALSE
YNFPNPNPFVEDDM+15.995DK+11.051NEIASVAYR+11.032	sp|O15371|EIF3D_HUMAN;sp|O15371-2|EIF3D_HUMAN;sp|O15371-3|EIF3D_HUMAN	0	0	0	0	0	1.42518e+06	0.000829187	FALSE
INPYMSSPC+57.021HIEMILTEK+4.025EQIVPK+4.025PEEEVAQK+4.025	tr|J3QQT2|J3QQT2_HUMAN;tr|A0A087WXM6|A0A087WXM6_HUMAN;tr|A0A0A0MRF8|A0A0A0MRF8_HUMAN;tr|A0A0A6YYL6|A0A0A6YYL6_HUMAN;tr|J3QLC8|J3QLC8_HUMAN;tr|J3KRX5|J3KRX5_HUMAN;sp|P18621|RL17_HUMAN;sp|P18621-2|RL17_HUMAN;sp|P18621-3|RL17_HUMAN	49706712	28819812	117188584	20199108	96280912	164141984	0	FALSE
DQEGQDVLLFIDNIFR+3.988	tr|F8W0P7|F8W0P7_HUMAN;tr|H0YH81|H0YH81_HUMAN;sp|P06576|ATPB_HUMAN	10202803	4.29849e+06	20363434	3.63335e+06	18901204	35501520	0	FALSE
LASPSGSTSSGLEVVAPEGTSAPGGGPGTLDDSATIC+57.021R+9.038	tr|M0R0K9|M0R0K9_HUMAN;sp|Q13263|TIF1B_HUMAN;sp|Q13263-2|TIF1B_HUMAN	12922181	4776987	22477832	6.16742e+06	20719152	42657028	0	FALSE
K+11.051SLQVQQHSK+11.051	sp|Q8IY85|EFC13_HUMAN;sp|Q8IY85-2|EFC13_HUMAN	0	0	0	0	1.48101e+06	77401600	0.00381762	FALSE
WLSC+57.021ETQLPVSFR+11.032	sp|O75643|U520_HUMAN	0	2.94556e+06	5.70829e+06	5.01715e+06	8676950	15358790	0	FALSE
VGEAGLLSVDC+57.021SEAGPGALGLEAVSDSGTK+1.994	tr|E7EN95|E7EN95_HUMAN;sp|O75369|FLNB_HUMAN;sp|O75369-2|FLNB_HUMAN;sp|O75369-3|FLNB_HUMAN;sp|O75369-7|FLNB_HUMAN;sp|O75369-4|FLNB_HUMAN;sp|O75369-5|FLNB_HUMAN;sp|O75369-6|FLNB_HUMAN;sp|O75369-8|FLNB_HUMAN;sp|O75369-9|FLNB_HUMAN	3.545e+06	710178	6.8849e+06	3.06291e+06	7071495	19237182	0	FALSE
FVDGLMIHSGDPVNYYVDTAVR+9.038	tr|H0YEU2|H0YEU2_HUMAN;tr|E9PL09|E9PL09_HUMAN;tr|E9PSF4|E9PSF4_HUMAN;sp|P23396|RS3_HUMAN;sp|P23396-2|RS3_HUMAN	9149363	0	12995940	1.62005e+06	9798889	23881846	0	FALSE
LK+11.051GIEEEEILPGFILC+57.021DPNNLC+57.021HSGR+11.032	tr|H3BR35|H3BR35_HUMAN;sp|P15170|ERF3A_HUMAN;sp|P15170-2|ERF3A_HUMAN;sp|P15170-3|ERF3A_HUMAN	8821369	8936434	61624704	0	55295668	105512512	0	FALSE
MQHLNPDPQLIPEQITTDITPEC+57.021LVSPR+3.988	tr|A0A0U1RRM8|A0A0U1RRM8_HUMAN;tr|H0YJ34|H0YJ34_HUMAN;tr|H0YJB6|H0YJB6_HUMAN;sp|Q96AC1|FERM2_HUMAN;sp|Q96AC1-2|FERM2_HUMAN;sp|Q96AC1-3|FERM2_HUMAN	23690000	6994123	46104488	22032666	31358270	78685320	0	FALSE
IEYDTFGELK+4.025VPNDK+4.025YYGAQTVR+3.988	sp|P07954|FUMH_HUMAN;sp|P07954-2|FUMH_HUMAN	19234330	5411696	49153500	5476837	49921684	85588776	0	FALSE
AYMC+57.021PFMQFIEGGR+11.032R+11.032	tr|G5EA31|G5EA31_HUMAN;sp|P53992|SC24C_HUMAN;sp|O94855|SC24D_HUMAN;sp|O94855-2|SC24D_HUMAN	1.23744e+06	603043	3.93412e+06	6192.15	4020135	9277808	0.000106883	FALSE
AAFDDAIAELDTLSEESYK+4.025DSTLIM+15.995QLLR+3.988	tr|K7EM20|K7EM20_HUMAN;sp|P62258|1433E_HUMAN;sp|P62258-2|1433E_HUMAN	6.20857e+06	2.73934e+06	11286953	3.48101e+06	15754784	20228412	0	FALSE
R+3.988MPQAPPSLC+57.021VTPYPEPSEC+57.021SWK+4.025DPEAEAALELALSITR+3.988	tr|A0A140T936|A0A140T936_HUMAN;sp|P26640|SYVC_HUMAN	11335012	6889045	39294416	10064156	27172558	43468856	0	FALSE
LAQEGIYTLYPFINSR+3.988	sp|Q08J23|NSUN2_HUMAN;sp|Q08J23-2|NSUN2_HUMAN;sp|Q08J23-3|NSUN2_HUMAN	16727289	6.16917e+06	38439144	11507638	28256570	57817604	0	FALSE
GPSTEYGFYHDFFLGK+4.025	tr|U3KQG0|U3KQG0_HUMAN;tr|F6S7Q7|F6S7Q7_HUMAN;sp|Q9BW92|SYTM_HUMAN;sp|Q9BW92-2|SYTM_HUMAN	5.08626e+06	553244	7915543	3.18975e+06	7208831	16980670	0	FALSE
IDNSQVESGSLEDDWDFLPPK+4.025	tr|K7EJB9|K7EJB9_HUMAN;sp|P27797|CALR_HUMAN	41727936	8240820	24284158	16339640	26294712	57347656	0	FALSE
VIEINPYLLGTM+15.995AGGAADC+57.021SFWER+3.988	tr|H0YJM8|H0YJM8_HUMAN;sp|P28074|PSB5_HUMAN;sp|P28074-2|PSB5_HUMAN	2.22649e+06	6021640	10958107	298665	9348509	8.07664e+06	0	FALSE
ADTLTPEEC+57.021QQFK+11.051K+11.051	tr|A0A0U1RRE1|A0A0U1RRE1_HUMAN;tr|E7ES33|E7ES33_HUMAN;tr|G3V1Q4|G3V1Q4_HUMAN;tr|E7EPK1|E7EPK1_HUMAN;sp|Q16181|SEPT7_HUMAN;sp|Q16181-2|SEPT7_HUMAN	8185966	3.95089e+06	20579260	4.51473e+06	26526174	36139212	0	FALSE
LSDC+57.021GLGDLAITSLLLLNQC+57.021LEELQGVR+9.038	tr|A0A3B3IUD7|A0A3B3IUD7_HUMAN;sp|Q14690|RRP5_HUMAN	525358	3.22027e+06	5.3978e+06	886491	5.2717e+06	9432840	0	FALSE
SEPVK+4.025EESSELEQPFAQDTSSVGPDR+3.988	sp|Q15424|SAFB1_HUMAN;sp|Q15424-2|SAFB1_HUMAN;sp|Q15424-3|SAFB1_HUMAN;sp|Q15424-4|SAFB1_HUMAN;sp|Q14151|SAFB2_HUMAN	8590026	6463163	13684879	3.1961e+06	14332685	23122054	0	FALSE
GYVK+4.025EQFAWR+3.988	tr|A0A1W2PQS6|A0A1W2PQS6_HUMAN;tr|A0A2R8Y6L3|A0A2R8Y6L3_HUMAN;tr|A0A2R8Y7H1|A0A2R8Y7H1_HUMAN;tr|A0A2R8YFH6|A0A2R8YFH6_HUMAN;tr|F6U211|F6U211_HUMAN;tr|S4R435|S4R435_HUMAN;sp|P46783|RS10_HUMAN	99197568	44011008	220697856	22996934	193280816	362711936	0	FALSE
SGDAAIVDMVPGK+4.025PM+15.995C+57.021VESFSDYPPLGR+3.988	tr|A0A087WVQ9|A0A087WVQ9_HUMAN;sp|Q5VTE0|EF1A3_HUMAN;sp|P68104|EF1A1_HUMAN;sp|P68104-2|EF1A1_HUMAN	4.43373e+06	4613407	19894576	0	21224128	20764500	0	FALSE
AGVYPEK+4.025DQAENEDGAQENTFSMDPQLER+3.988	sp|P50570|DYN2_HUMAN;sp|P50570-2|DYN2_HUMAN;sp|P50570-3|DYN2_HUMAN;sp|P50570-4|DYN2_HUMAN;sp|P50570-5|DYN2_HUMAN	9133545	5.74336e+06	22341428	4698304	20318014	36739756	0	FALSE
IQVSSEK+4.025EAAPDAGAEPITADSDPAYSSK+4.025	tr|E5RHJ4|E5RHJ4_HUMAN;sp|Q8N163|CCAR2_HUMAN;sp|Q8N163-2|CCAR2_HUMAN	10572683	4389179	13782553	2.48656e+06	16624278	39358596	0	FALSE
LMEPIYLVEIQC+57.021PEQVVGGIYGVLNR+3.988	sp|P13639|EF2_HUMAN	20140076	10971007	41153156	7031323	18540060	49067048	0	FALSE
SGDAAIVDMVPGK+4.025PM+15.995C+57.021VESFSDYPPLGR+3.988	tr|A0A087WVQ9|A0A087WVQ9_HUMAN;sp|Q5VTE0|EF1A3_HUMAN;sp|P68104|EF1A1_HUMAN;sp|P68104-2|EF1A1_HUMAN	7.56392e+06	2.86778e+06	16339241	4900729	7589477	25035414	0	FALSE
IWDYQNK+8.050	sp|P35606|COPB2_HUMAN;sp|P35606-2|COPB2_HUMAN	16974556	5311241	31944444	5.52495e+06	38464548	72205040	0	FALSE
MLPTIIADNAGYDSADLVAQLR+3.988	tr|F5GWF6|F5GWF6_HUMAN;sp|P78371|TCPB_HUMAN;sp|P78371-2|TCPB_HUMAN	7.4419e+06	3.05905e+06	9476684	2.71492e+06	10270079	19976306	0	FALSE
FNAPGAQQFC+57.021FLLSTR+3.988	tr|F5GWX5|F5GWX5_HUMAN;tr|A0A2R8Y5Z7|A0A2R8Y5Z7_HUMAN;tr|A0A2R8Y5J0|A0A2R8Y5J0_HUMAN;tr|A0A2R8Y8C1|A0A2R8Y8C1_HUMAN;tr|A0A2R8YER1|A0A2R8YER1_HUMAN;tr|A0A2R8Y425|A0A2R8Y425_HUMAN;tr|A0A2R8Y445|A0A2R8Y445_HUMAN;tr|A0A2R8Y521|A0A2R8Y521_HUMAN;tr|A0A2R8Y685|A0A2R8Y685_HUMAN;tr|A0A2R8YD40|A0A2R8YD40_HUMAN;tr|A0A2U3TZM0|A0A2U3TZM0_HUMAN;tr|A0A2R8YFD8|A0A2R8YFD8_HUMAN;tr|A0A2R8Y212|A0A2R8Y212_HUMAN;tr|A…	3951639	3.32543e+06	6.92683e+06	1.90414e+06	8915039	14581636	0	FALSE
LEDTENWLYEDGEDQPK+4.025	tr|A0A087WYC1|A0A087WYC1_HUMAN;sp|P34932|HSP74_HUMAN	5092172	2.36961e+06	14014461	4667829	16181242	24937808	0	FALSE
ETVYC+57.021LNDDDETEVLK+4.025EDIIQGFR+3.988	sp|P13010|XRCC5_HUMAN	3.64305e+06	1.96344	3.78005e+06	4255634	3.71384e+06	4.82213e+06	0	FALSE
LDHYAIIK+11.051FPLTTESAMK+11.051	tr|H7BY10|H7BY10_HUMAN;tr|K7ERT8|K7ERT8_HUMAN;tr|K7EJV9|K7EJV9_HUMAN;tr|A8MUS3|A8MUS3_HUMAN;sp|P62750|RL23A_HUMAN	4919776	2.06939e+06	10806695	1.27725e+06	7.88442e+06	15786020	0	FALSE
QLFHPEQLITGK+4.025EDAANNYAR+3.988	tr|C9J2C0|C9J2C0_HUMAN;tr|C9JQ00|C9JQ00_HUMAN;tr|C9JJQ8|C9JJQ8_HUMAN;tr|C9JDL2|C9JDL2_HUMAN;tr|C9JEV8|C9JEV8_HUMAN;tr|F8VVB9|F8VVB9_HUMAN;tr|F8VRZ4|F8VRZ4_HUMAN;tr|C9K0S6|C9K0S6_HUMAN;tr|F5H5D3|F5H5D3_HUMAN;tr|F8VWV9|F8VWV9_HUMAN;tr|F8VQQ4|F8VQQ4_HUMAN;tr|F8VX09|F8VX09_HUMAN;tr|A0A1W2PQM2|A0A1W2PQM2_HUMAN;tr|F8VS66|F8VS66_HUMAN;sp|P68363|TBA1B_HUMAN;sp|P68363-2|TBA1B_HUMAN;sp|Q9NY65|TBA8_HUMAN;sp…	200528832	102424808	474522976	69912136	407378912	993391680	0	FALSE
R+3.988DNYVPEVSALDQEIIEVDPDTK+4.025EMLK+4.025	tr|A0A075B716|A0A075B716_HUMAN;tr|H3BNC9|H3BNC9_HUMAN;tr|H0YN88|H0YN88_HUMAN;sp|P08708|RS17_HUMAN	21159054	11277606	51288808	8670054	36588108	76882664	0	FALSE
VIHDNFGIVEGLMTTVHAITATQK+4.025	tr|E7EUT5|E7EUT5_HUMAN;sp|P04406|G3P_HUMAN;sp|P04406-2|G3P_HUMAN	94948360	54453828	129165640	42623640	85576696	135376448	0	FALSE
IDATQVEVNPFGETPEGQVVC+57.021FDAK+4.025	tr|E9PDQ8|E9PDQ8_HUMAN;sp|Q96I99|SUCB2_HUMAN;sp|Q96I99-2|SUCB2_HUMAN	1.36067e+06	313329	6796650	1.36955e+06	4354772	7.8888e+06	0	FALSE
HGESIC+57.021LSPC+57.021NTLAAVTDDFGR+11.032	sp|Q9H2M9|RBGPR_HUMAN	1.03055e+06	3.27326e+06	13607198	541763	9602628	15282780	0	FALSE
YEDIC+57.021PSTHNMDVPNIK+1.994	tr|I3L397|I3L397_HUMAN;tr|C9J4W5|C9J4W5_HUMAN;tr|F8WCJ1|F8WCJ1_HUMAN;tr|C9J7B5|C9J7B5_HUMAN;tr|I3L504|I3L504_HUMAN;sp|P63241|IF5A1_HUMAN;sp|P63241-2|IF5A1_HUMAN;sp|Q9GZV4|IF5A2_HUMAN;sp|Q6IS14|IF5AL_HUMAN	26579386	4432155	51390780	15392742	43842136	87634464	0	FALSE
SPGVVISDDEPGYDLDLFC+57.021IPNHYAEDLER+3.988	sp|P00492|HPRT_HUMAN	51205312	80206520	95652040	73648024	127430560	290849920	0	FALSE
GQGVYLGMPGC+57.021LPVYDALAGEFIR+3.988	tr|F8VY02|F8VY02_HUMAN;sp|P30040|ERP29_HUMAN	1.56803e+06	230083	6833513	416898	7.9573e+06	12572483	0	FALSE
TNQELQEINR+1.994	tr|H0YKS4|H0YKS4_HUMAN;tr|H0YMD0|H0YMD0_HUMAN;tr|H0YL33|H0YL33_HUMAN;tr|H0YLE2|H0YLE2_HUMAN;tr|H0YN42|H0YN42_HUMAN;tr|H0YMU9|H0YMU9_HUMAN;tr|H0YM50|H0YM50_HUMAN;tr|H0YNA0|H0YNA0_HUMAN;tr|H0YN28|H0YN28_HUMAN;tr|H0YN52|H0YN52_HUMAN;tr|H0YMM1|H0YMM1_HUMAN;tr|H0YNP5|H0YNP5_HUMAN;sp|P07355|ANXA2_HUMAN;sp|P07355-2|ANXA2_HUMAN;sp|A6NMY6|AXA2L_HUMAN	311777696	95927320	632820480	41480580	594900672	1415382656	0	FALSE
TAFDDAIAELDTLNEDSYK+4.025DSTLIMQLLR+3.988	sp|P61981|1433G_HUMAN	9180828	7.00988e+06	18432840	7.26058e+06	24027464	28164202	0	FALSE
ILTER+3.988SQR+3.988	tr|C9J1J0|C9J1J0_HUMAN;sp|Q08828|ADCY1_HUMAN	864055	350622720	241444896	1.72244e+06	504010	11724.4	0.00911497	FALSE
VLNVPLC+57.021K+4.025EDC+57.021EQWWEDC+57.021R+3.988	sp|P15328|FOLR1_HUMAN	10015581	5580261	29439140	1.60782e+06	31632432	96405880	0	FALSE
LNLSVTTPYNADFDGDEMNLHLPQSLETR+3.988	sp|P24928|RPB1_HUMAN;sp|P24928-2|RPB1_HUMAN	7.43428e+06	4244507	17090684	4977863	20276366	37026424	0	FALSE
IC+57.021ELLPEAAINDVYLAPLLQC+57.021LIEGLSAEPR+3.988	tr|J3QKQ5|J3QKQ5_HUMAN;tr|J3KTM9|J3KTM9_HUMAN;sp|Q14974|IMB1_HUMAN;sp|Q14974-2|IMB1_HUMAN	35942460	0	25712452	37087956	6998878	49815440	0.000677179	FALSE
FSPDSTLLATC+57.021SADQTC+57.021K+4.025	tr|H3BSZ4|H3BSZ4_HUMAN;tr|A0A0A0MR05|A0A0A0MR05_HUMAN;sp|Q9BVC4|LST8_HUMAN;sp|Q9BVC4-3|LST8_HUMAN;sp|Q9BVC4-5|LST8_HUMAN	4400628	1.55726e+06	6.093e+06	1.7389e+06	6917522	15126425	0	FALSE
TQLASWSDPTEETGPVAGILDTETLEK+4.025	tr|H0YDN1|H0YDN1_HUMAN;sp|Q15149|PLEC_HUMAN;sp|Q15149-2|PLEC_HUMAN;sp|Q15149-3|PLEC_HUMAN;sp|Q15149-4|PLEC_HUMAN;sp|Q15149-5|PLEC_HUMAN;sp|Q15149-6|PLEC_HUMAN;sp|Q15149-7|PLEC_HUMAN;sp|Q15149-8|PLEC_HUMAN;sp|Q15149-9|PLEC_HUMAN	3.10837e+06	1.82312e+06	7710247	3.78335e+06	10797553	22809650	0	FALSE
ILTFDQLALDSPK+4.025GC+57.021GTVLLSGPR+3.988	tr|G3V203|G3V203_HUMAN;tr|H0YHA7|H0YHA7_HUMAN;tr|J3QQ67|J3QQ67_HUMAN;tr|F8VUA6|F8VUA6_HUMAN;sp|Q07020|RL18_HUMAN;sp|Q07020-2|RL18_HUMAN	595897	19814662	22671624	7.21427e+06	46861992	6.04938e+06	0	FALSE
GVNC+57.021IDYYSGGDK+4.025PYLISGADDR+3.988LVK+4.025	sp|P35606|COPB2_HUMAN;sp|P35606-2|COPB2_HUMAN	545868	848813	11107642	0	9467224	26571826	0	FALSE
ISK+1.994EVLAGR+1.994PLFPHVLC+57.021HNC+57.021AVEFNFGQK+1.994	tr|A0A1W2PQL0|A0A1W2PQL0_HUMAN;tr|A0A1W2PP34|A0A1W2PP34_HUMAN;tr|Q5RI18|Q5RI18_HUMAN;tr|A0A1W2PQ74|A0A1W2PQ74_HUMAN;tr|A0A1W2PPH7|A0A1W2PPH7_HUMAN;tr|A0A1W2PP35|A0A1W2PP35_HUMAN;tr|A0A1W2PPL4|A0A1W2PPL4_HUMAN;tr|A0A1W2PPS1|A0A1W2PPS1_HUMAN;tr|A0A1X7SBS1|A0A1X7SBS1_HUMAN;tr|A0A1W2PRZ7|A0A1W2PRZ7_HUMAN;sp|Q00839|HNRPU_HUMAN;sp|Q00839-2|HNRPU_HUMAN	41308320	18177974	102635312	8301243	109811448	167038016	0	FALSE
YIYDQC+57.021PAVAGYGPIEQLPDYNR+3.988	sp|P31930|QCR1_HUMAN	16342868	3.47211e+06	38528124	15020764	36715236	66603672	0	FALSE
TAFDDAIAELDTLNEDSYK+4.025DSTLIMQLLR+3.988	sp|P61981|1433G_HUMAN	1.70602e+06	1.27945e+06	3971485	1.47993e+06	3.32089e+06	8211195	0	FALSE
GQGVYLGM+15.995PGC+57.021LPVYDALAGEFIR+3.988	tr|F8VY02|F8VY02_HUMAN;sp|P30040|ERP29_HUMAN	31116010	5.46436e+06	18055792	4.34714e+06	17018340	23031772	0	FALSE
K+4.025GYEVIYLTEPVDEYC+57.021IQALPEFDGK+4.025R+3.988	sp|P14625|ENPL_HUMAN	19822470	10569949	56857564	4297388	48862136	79564240	0	FALSE
DQAVENILVSPVVVASSLGLVSLGGK+4.025	tr|E9PJH8|E9PJH8_HUMAN;tr|E9PNX1|E9PNX1_HUMAN;tr|E9PK86|E9PK86_HUMAN;tr|E9PLA6|E9PLA6_HUMAN;tr|E9PRS3|E9PRS3_HUMAN;tr|E9PIG2|E9PIG2_HUMAN;tr|E9PMI5|E9PMI5_HUMAN;tr|E9PR70|E9PR70_HUMAN;tr|E9PPV6|E9PPV6_HUMAN;sp|P50454|SERPH_HUMAN	14128250	4937478	39405440	11183657	43942872	79755128	0	FALSE
TVVVNC+57.021NPETVSTDFDEC+57.021DK+4.025LYFEELSLER+3.988	sp|P31327|CPSM_HUMAN;sp|P31327-2|CPSM_HUMAN;sp|P31327-3|CPSM_HUMAN	10074996	6.6637e+06	34021400	4736511	38987196	50507016	0	FALSE
LM+15.995EPIYLVEIQC+57.021PEQVVGGIYGVLNR+3.988K+4.025	sp|P13639|EF2_HUMAN	8842365	4.10566e+06	19725136	1073600	17562646	29407826	0	FALSE
R+9.038DNYVPEVSALDQEIIEVDPDTK+8.050EMLK+8.050	tr|A0A075B716|A0A075B716_HUMAN;tr|H3BNC9|H3BNC9_HUMAN;tr|H0YN88|H0YN88_HUMAN;sp|P08708|RS17_HUMAN	17912338	11247809	49784724	8.11957e+06	36216852	76521000	0	FALSE
MTEEEVEMLVAGHEDSNGC+57.021INYEELVR+3.988	tr|F8VZU9|F8VZU9_HUMAN;tr|G8JLA2|G8JLA2_HUMAN;tr|F8W180|F8W180_HUMAN;tr|F8VXL3|F8VXL3_HUMAN;sp|P60660-2|MYL6_HUMAN	3.01221e+06	3026870	13716275	7.7618e+06	2.28769e+06	37635880	0	FALSE
GLSEDTTEETLK+4.025ESFDGSVR+3.988	tr|H7BY16|H7BY16_HUMAN;sp|P19338|NUCL_HUMAN	14245244	3.74182e+06	33704084	4032971	29330516	48213984	0	FALSE
LAYVAAGDLAPINAFIGGLAAQEVM+15.995K+4.025	sp|P22314|UBA1_HUMAN;sp|P22314-2|UBA1_HUMAN	27823498	31912916	17501452	23789566	91842648	45833.6	0.000106883	FALSE
YIYDQC+57.021PAVAGYGPIEQLPDYNR+3.988	sp|P31930|QCR1_HUMAN	16174279	3.38962e+06	37973868	16526479	36807116	71903480	0	FALSE
LAALNPESNTAGLDIFAK+4.025	sp|O00299|CLIC1_HUMAN	43814500	11605403	82178168	22849748	80143808	149711568	0	FALSE
DGIEPGHIPGTVNIPFTDFLSQEGLEK+4.025SPEEIR+3.988	sp|P25325|THTM_HUMAN;sp|P25325-2|THTM_HUMAN	50310968	29168770	116263672	38649256	92069728	158645824	0.000829187	FALSE
ER+3.988LEQQVPVNQVFGQDEMIDVIGVTK+4.025	tr|G5E9G0|G5E9G0_HUMAN;tr|H7C422|H7C422_HUMAN;tr|B5MCW2|B5MCW2_HUMAN;tr|H7C3M2|H7C3M2_HUMAN;sp|P39023|RL3_HUMAN	14767357	8007088	38800132	5.8988e+06	34826488	61962772	0	FALSE
GIFPVLC+57.021K+4.025DPVQEAWAEDVDLR+3.988	tr|B4DNK4|B4DNK4_HUMAN;tr|H3BR70|H3BR70_HUMAN;sp|P14618|KPYM_HUMAN;sp|P14618-2|KPYM_HUMAN;sp|P14618-3|KPYM_HUMAN	14184042	6.56331e+06	49548280	5.15746e+06	35256208	69500088	0	FALSE
YLEVSEPQDIEC+57.021C+57.021GALEYYDK+4.025	tr|B0QYA5|B0QYA5_HUMAN;sp|O15371|EIF3D_HUMAN;sp|O15371-2|EIF3D_HUMAN;sp|O15371-3|EIF3D_HUMAN	7524671	3.73701e+06	9338927	5052521	11224253	20701922	0	FALSE
QQLSAEELDAQLDAYNAR+3.988	tr|E9PB61|E9PB61_HUMAN;sp|Q86V81|THOC4_HUMAN	7.72568e+06	2.57076e+06	10964077	0	13543836	22615330	0	FALSE
M+15.995K+4.025EIAEAYLGYPVTNAVITVPAYFNDSQR+3.988	tr|A0A0G2JIW1|A0A0G2JIW1_HUMAN;sp|P0DMV9|HS71B_HUMAN;sp|P0DMV8|HS71A_HUMAN	11731955	6542204	25630110	5397005	9682364	36847904	0	FALSE
GIFPVLC+57.021K+4.025DPVQEAWAEDVDLR+3.988	tr|B4DNK4|B4DNK4_HUMAN;tr|H3BR70|H3BR70_HUMAN;sp|P14618|KPYM_HUMAN;sp|P14618-2|KPYM_HUMAN;sp|P14618-3|KPYM_HUMAN	14127735	6435804	49434084	2.95864e+06	35301532	69841240	0	FALSE
GNFGGSFAGSFGGAGGHAPGVAR+3.988	tr|A0A087X0X3|A0A087X0X3_HUMAN;tr|M0R2I7|M0R2I7_HUMAN;tr|M0QY96|M0QY96_HUMAN;sp|P52272|HNRPM_HUMAN;sp|P52272-2|HNRPM_HUMAN	1.20709e+06	166330	3.03167e+06	1.77001e+06	10033490	19604860	0	FALSE
YLEVSEPQDIEC+57.021C+57.021GALEYYDK+4.025AFDR+3.988	tr|B0QYA5|B0QYA5_HUMAN;sp|O15371|EIF3D_HUMAN;sp|O15371-2|EIF3D_HUMAN;sp|O15371-3|EIF3D_HUMAN	36529892	24203196	94199672	15239554	100012136	180963296	0	FALSE
VHSPSGALEEC+57.021YVTEIDQDK+4.025YAVR+3.988	tr|Q60FE5|Q60FE5_HUMAN;tr|A0A087WWY3|A0A087WWY3_HUMAN;sp|P21333|FLNA_HUMAN;sp|P21333-2|FLNA_HUMAN	8725558	3878611	30559082	3.90921e+06	25872980	48898144	0	FALSE
YIYDQC+57.021PAVAGYGPIEQLPDYNR+9.038	sp|P31930|QCR1_HUMAN	85791648	21965088	161458512	34460096	182008000	277440832	0	FALSE
ELNIDVADVESLLVQC+57.021ILDNTIHGR+3.988	tr|B4DIH5|B4DIH5_HUMAN;sp|P61201|CSN2_HUMAN;sp|P61201-2|CSN2_HUMAN	4094302	861431	8595791	1.41415e+06	6938918	13898234	0	FALSE
GDWSVGAPGGVQEITYTVPADK+4.025C+57.021GLVIGK+4.025	sp|Q96I24|FUBP3_HUMAN	12445221	10788903	20158520	11471399	19524524	31226906	0	FALSE
EK+4.025IDLENTLEQEQEALVNR+3.988	sp|Q16204|CCDC6_HUMAN	668043	1.60918e+06	1.24939e+06	0	2.6185e+06	4.68358e+06	0	FALSE
K+4.025GSITSVQAIYVPADDLTDPAPATTFAHLDATTVLSR+3.988	tr|H0YH81|H0YH81_HUMAN;tr|H0YI37|H0YI37_HUMAN;sp|P06576|ATPB_HUMAN	17632626	10102671	41698732	2.02719e+06	42272504	78769432	0.000356979	FALSE
LGAASLGAEDPETQVVLINAVK+4.025DVAK+4.025	sp|Q9Y490|TLN1_HUMAN	1.6891e+06	366587	6676061	5609742	7281283	7881785	0	FALSE
TAFDEAIAELDTLSEESYK+4.025DSTLIM+15.995QLLR+3.988	tr|H0YB80|H0YB80_HUMAN;tr|E7EX29|E7EX29_HUMAN;tr|B0AZS6|B0AZS6_HUMAN;tr|B7Z2E6|B7Z2E6_HUMAN;sp|P63104|1433Z_HUMAN;sp|P63104-2|1433Z_HUMAN	2.53224e+06	806242	6.18028e+06	3.05606e+06	5906175	14913123	0	FALSE
MTEEEVEMLVAGHEDSNGC+57.021INYEELVR+11.032	tr|F8VZU9|F8VZU9_HUMAN;tr|G8JLA2|G8JLA2_HUMAN;tr|F8W180|F8W180_HUMAN;tr|F8VXL3|F8VXL3_HUMAN;sp|P60660-2|MYL6_HUMAN	3.17258e+06	2.20729e+06	13040035	7.3993e+06	1271013	37272216	0	FALSE
IQVSSEK+4.025EAAPDAGAEPITADSDPAYSSK+4.025	tr|E5RHJ4|E5RHJ4_HUMAN;sp|Q8N163|CCAR2_HUMAN;sp|Q8N163-2|CCAR2_HUMAN	4.96175e+06	4.20026e+06	13445652	3.95429e+06	16932670	38338372	0	FALSE
ALVAIGTHDLDTLSGPFTYTAK+4.025	sp|Q9NSD9|SYFB_HUMAN;sp|Q9NSD9-2|SYFB_HUMAN	17995582	5.27155e+06	43652932	10348056	44459052	70005608	0	FALSE
GVNIGGAGSYIYEK+4.025PLAEGPQVTGPIEVPAAR+3.988	tr|H0YFA4|H0YFA4_HUMAN;sp|P52943|CRIP2_HUMAN;sp|P52943-2|CRIP2_HUMAN	3.13717e+06	0	8.38175e+06	0	2.79413e+06	10266394	0	FALSE
LIEVDK+4.025DWVPDAAGTSLYVR+3.988PVLIGNEPSLGVSQPTR+3.988	tr|B3KSI3|B3KSI3_HUMAN;tr|M0QZP4|M0QZP4_HUMAN;tr|M0QXF9|M0QXF9_HUMAN;tr|M0QZ10|M0QZ10_HUMAN;sp|O15382|BCAT2_HUMAN;sp|O15382-2|BCAT2_HUMAN	6.78703e+06	6291994	20659318	2.16415e+06	23992182	39540896	0.000829187	FALSE
ELQNAPDAIPESGVEPPALDTAWVEATR+3.988K+4.025	tr|C9JFE4|C9JFE4_HUMAN;tr|A8K070|A8K070_HUMAN;tr|A0A096LP07|A0A096LP07_HUMAN;tr|J3KRJ4|J3KRJ4_HUMAN;tr|J3KTB0|J3KTB0_HUMAN;tr|J3KSA5|J3KSA5_HUMAN;tr|J3QLT0|J3QLT0_HUMAN;tr|J3QS88|J3QS88_HUMAN;tr|A0A096LPJ3|A0A096LPJ3_HUMAN;sp|Q13098|CSN1_HUMAN;sp|Q13098-5|CSN1_HUMAN;sp|Q13098-7|CSN1_HUMAN	0	3031537	7.618e+06	5223477	7.59116e+06	13188203	0	FALSE
MK+4.025EIAEAYLGYPVTNAVITVPAYFNDSQR+3.988	tr|A0A0G2JIW1|A0A0G2JIW1_HUMAN;sp|P0DMV9|HS71B_HUMAN;sp|P0DMV8|HS71A_HUMAN	10124924	12057925	25468926	6278118	32142382	63335676	0	FALSE
TATSLAEGLSLVVSPDSIHSVAPENEGR+3.988	sp|Q9BTV4|TMM43_HUMAN	8689922	38764.9	3841454	359609	5364809	11851420	0	FALSE
FMQTFVLAPEGSVANK+4.025	tr|E5RIZ6|E5RIZ6_HUMAN;sp|Q13283|G3BP1_HUMAN	27080704	0	30252304	6523314	36614860	79439288	0	FALSE
TAFDDAIAELDTLNEDSYK+4.025DSTLIMQLLR+3.988	sp|P61981|1433G_HUMAN	1.22766e+06	1.07275e+06	3.49237e+06	1.20785e+06	2805389	7102457	0	FALSE
TYTDELTPIESAVSVFK+4.025	sp|O75489|NDUS3_HUMAN	22420446	4905317	36064876	8.28027e+06	43325572	61397712	0	FALSE
IEFEGQPVDFVDPNK+4.025QNLIAEVSTK+4.025DVK+4.025	tr|Q5R211|Q5R211_HUMAN;sp|P31327|CPSM_HUMAN;sp|P31327-3|CPSM_HUMAN	8542539	2.31845e+06	11303275	0	13744976	13134711	0	FALSE
LQAALDDEEAGGR+3.988PAM+15.995EPGNGSLDLGGDSAGR+3.988	tr|A0A1W2PPS1|A0A1W2PPS1_HUMAN;tr|A0A1X7SBS1|A0A1X7SBS1_HUMAN;sp|Q00839|HNRPU_HUMAN;sp|Q00839-2|HNRPU_HUMAN	0	1.39662e+06	5709837	0	5655980	9415748	0	FALSE
GEGYAK+4.025PNEGAIVEVALEGYYK+4.025DK+4.025LFDQR+3.988	sp|Q02790|FKBP4_HUMAN	4.92814e+06	6296136	14790600	0	14265129	24550514	0	FALSE
GLTAVSNNAGVDNFGLGLLLR+3.988	sp|P55809|SCOT1_HUMAN	8008596	16835344	17280964	20358558	5.38884e+06	35216020	0	FALSE
LM+15.995EPIYLVEIQC+57.021PEQVVGGIYGVLNR+3.988	sp|P13639|EF2_HUMAN	31369432	5.99315e+06	88638200	57434436	86592536	82559112	0	FALSE
TLMNLGGLAVAR+3.988DDGLFSGDPNWFPK+4.025	tr|X6RJP6|X6RJP6_HUMAN;sp|P37802|TAGL2_HUMAN;sp|P37802-2|TAGL2_HUMAN	26003374	10215017	59369988	9147849	62988852	111003552	0	FALSE
K+4.025EPVGDDESVPENVLSFDDLTADALANLK+4.025	tr|Q5T5C7|Q5T5C7_HUMAN;sp|P49591|SYSC_HUMAN	7130060	3302991	27259658	4493613	18569936	28303296	0	FALSE
ALMTVGK+4.025EPFPTIYVDSQK+4.025ENER+3.988	tr|K7EQ35|K7EQ35_HUMAN;tr|K7EJ19|K7EJ19_HUMAN;tr|K7EIU7|K7EIU7_HUMAN;sp|O43776|SYNC_HUMAN;sp|O43776-2|SYNC_HUMAN	6.64026e+06	2.47338	23322082	39547136	36663724	10613682	0	FALSE
IDNSQVESGSLEDDWDFLPPK+4.025	tr|K7EJB9|K7EJB9_HUMAN;sp|P27797|CALR_HUMAN	20199950	1.80396e+06	39605560	19150584	36817228	70280072	0	FALSE
SSILLDVK+4.025PWDDETDM+15.995AK+4.025LEEC+57.021VR+3.988	sp|P24534|EF1B_HUMAN	132988552	104021760	23197680	6.59373e+06	16061336	39826004	0	FALSE
MTEEEVEMLVAGHEDSNGC+57.021INYEELVR+3.988	tr|F8VZU9|F8VZU9_HUMAN;tr|G8JLA2|G8JLA2_HUMAN;tr|F8W180|F8W180_HUMAN;tr|F8VXL3|F8VXL3_HUMAN;sp|P60660-2|MYL6_HUMAN	3.25285e+06	3.01941e+06	13087486	7356283	2.24696e+06	38211588	0	FALSE
LAPITSDPTEATAVGAVEASFK+4.025	tr|B4DNK4|B4DNK4_HUMAN;sp|P14618|KPYM_HUMAN;sp|P14618-3|KPYM_HUMAN	175363232	58332140	372157824	139391264	355088896	719942016	0	FALSE
GNFTLPEVAEC+57.021FDEITYVELQK+4.025EEAQK+4.025LLEQYK+4.025EESK+4.025	tr|A0A1W2PQL0|A0A1W2PQL0_HUMAN;tr|A0A1W2PQD4|A0A1W2PQD4_HUMAN;tr|A0A1W2PP34|A0A1W2PP34_HUMAN;tr|Q5RI18|Q5RI18_HUMAN;tr|A0A1W2PPH7|A0A1W2PPH7_HUMAN;tr|A0A1W2PP35|A0A1W2PP35_HUMAN;tr|A0A1W2PPL4|A0A1W2PPL4_HUMAN;tr|A0A1W2PPS1|A0A1W2PPS1_HUMAN;tr|A0A1X7SBS1|A0A1X7SBS1_HUMAN;sp|Q00839|HNRPU_HUMAN;sp|Q00839-2|HNRPU_HUMAN	15916115	21604984	54169472	2.01503e+06	43380552	68228920	0	FALSE
NQLTSNPENTVFDAK+4.025	sp|P11021|BIP_HUMAN	5.30393e+06	6.71552e+06	9869448	9187596	16717222	27473530	0	FALSE
ISK+4.025EVLAGR+3.988PLFPHVLC+57.021HNC+57.021AVEFNFGQK+4.025	tr|A0A1W2PQL0|A0A1W2PQL0_HUMAN;tr|A0A1W2PP34|A0A1W2PP34_HUMAN;tr|Q5RI18|Q5RI18_HUMAN;tr|A0A1W2PQ74|A0A1W2PQ74_HUMAN;tr|A0A1W2PPH7|A0A1W2PPH7_HUMAN;tr|A0A1W2PP35|A0A1W2PP35_HUMAN;tr|A0A1W2PPL4|A0A1W2PPL4_HUMAN;tr|A0A1W2PPS1|A0A1W2PPS1_HUMAN;tr|A0A1X7SBS1|A0A1X7SBS1_HUMAN;tr|A0A1W2PRZ7|A0A1W2PRZ7_HUMAN;sp|Q00839|HNRPU_HUMAN;sp|Q00839-2|HNRPU_HUMAN	939463	0	2504742	0	3.00236e+06	3.87709e+06	0	FALSE
VLK+4.025EVEAVIPDHC+57.021IFASNTSALPISEIAAVSK+4.025R+3.988PEK+4.025	tr|H0YFD6|H0YFD6_HUMAN;tr|A0A2R8Y4F5|A0A2R8Y4F5_HUMAN;sp|P40939|ECHA_HUMAN	16918166	8457497	35116420	6174546	39999372	55328400	0	FALSE
VEPSDR+3.988YPQC+57.021LC+57.021LSPTYELALQTGK+4.025	tr|I3L352|I3L352_HUMAN;tr|I3L0H8|I3L0H8_HUMAN;tr|F6QDS0|F6QDS0_HUMAN;sp|Q9NUU7|DD19A_HUMAN;sp|Q9NUU7-2|DD19A_HUMAN	37896000	20895898	85785616	12684774	90541344	162577920	0	FALSE
VGADNHVLPLDC+57.021VTLQTFLAK+4.025	sp|P35573|GDE_HUMAN;sp|P35573-2|GDE_HUMAN;sp|P35573-3|GDE_HUMAN	22514746	10464531	51843456	11328228	49886828	62930632	0	FALSE
ALVLDC+57.021HYPEDEVGQEDEAESDIFSIR+3.988	tr|I3L3Q7|I3L3Q7_HUMAN;tr|I3L3B0|I3L3B0_HUMAN;sp|Q07021|C1QBP_HUMAN	210527184	68488368	565747776	102306728	585376512	984092288	0	FALSE
VLK+4.025EVEAVIPDHC+57.021IFASNTSALPISEIAAVSK+4.025R+3.988PEK+4.025	tr|H0YFD6|H0YFD6_HUMAN;tr|A0A2R8Y4F5|A0A2R8Y4F5_HUMAN;sp|P40939|ECHA_HUMAN	1.26064e+06	0	7221119	0	8965842	16936930	0	FALSE
AIVAIENPADVSVISSR+3.988	tr|F8WD59|F8WD59_HUMAN;tr|A0A0C4DG17|A0A0C4DG17_HUMAN;tr|C9J9K3|C9J9K3_HUMAN;sp|P08865|RSSA_HUMAN	662226560	228249664	1245352320	85882088	1091123712	2082391296	0	FALSE
R+3.988IDEINK+4.025ELNQVMEQLGDAR+3.988	tr|G8JLG1|G8JLG1_HUMAN;sp|Q14683|SMC1A_HUMAN	4280885	2.69674e+06	9026514	0	5.15138e+06	40666456	0	FALSE
DDGVFVQEVTQNSPAAR+9.038	tr|E9PJZ0|E9PJZ0_HUMAN;tr|E9PJC6|E9PJC6_HUMAN;tr|E9PKR9|E9PKR9_HUMAN;tr|E9PQE3|E9PQE3_HUMAN;tr|E9PLK4|E9PLK4_HUMAN;sp|Q09666|AHNK_HUMAN;sp|Q09666-2|AHNK_HUMAN	12474494	7.88728e+06	32663940	3682580	30302320	47509544	0	FALSE
YADLTEDQLPSC+57.021ESLK+4.025DTIAR+3.988	sp|P18669|PGAM1_HUMAN	638346112	392142816	1948942080	154509520	1540796544	2916239104	0	FALSE
SSGPYGGGGQYFAK+4.025PR+3.988	tr|F8W6I7|F8W6I7_HUMAN;tr|H0YH80|H0YH80_HUMAN;sp|P09651|ROA1_HUMAN;sp|P09651-2|ROA1_HUMAN;sp|P09651-3|ROA1_HUMAN	313985920	125126120	629732032	57361504	578204672	1243371264	0	FALSE
VWLDPNETNEIANANSR+3.988	tr|J3QR09|J3QR09_HUMAN;tr|J3KTE4|J3KTE4_HUMAN;sp|P84098|RL19_HUMAN	7.16398e+06	7354459	13539395	1.95727e+06	20792706	1.42649e+06	0	FALSE
GIFPVLC+57.021K+4.025DPVQEAWAEDVDLR+3.988	tr|B4DNK4|B4DNK4_HUMAN;tr|H3BR70|H3BR70_HUMAN;sp|P14618|KPYM_HUMAN;sp|P14618-2|KPYM_HUMAN;sp|P14618-3|KPYM_HUMAN	374561632	230083248	1145145216	118997840	882505728	1589032704	0	FALSE
LASPSGSTSSGLEVVAPEGTSAPGGGPGTLDDSATIC+57.021R+3.988	tr|M0R0K9|M0R0K9_HUMAN;sp|Q13263|TIF1B_HUMAN;sp|Q13263-2|TIF1B_HUMAN	13476296	4648672	23095914	5988909	21572316	44226720	0	FALSE
YFEITDESPYVHYLNTFSSK+4.025EPQR+3.988	tr|B4E3S0|B4E3S0_HUMAN;sp|Q9ULV4|COR1C_HUMAN;sp|Q9ULV4-2|COR1C_HUMAN;sp|Q9ULV4-3|COR1C_HUMAN	2.39334e+06	2394943	4485075	2.87622e+06	1.05598e+06	5869559	0	FALSE
FLPR+3.988EEGPYEVEVTYDGVPVPGSPFPLEAVAPTK+4.025PSK+4.025	tr|Q60FE5|Q60FE5_HUMAN;tr|A0A087WWY3|A0A087WWY3_HUMAN;sp|P21333|FLNA_HUMAN;sp|P21333-2|FLNA_HUMAN	4.8383e+06	0	7.09649e+06	0	8099350	19103636	0	FALSE
SSILLDVK+4.025PWDDETDM+15.995AK+4.025LEEC+57.021VR+3.988	sp|P24534|EF1B_HUMAN	93083992	1.75583e+06	29572674	5800300	19350766	42699940	0	FALSE
ADHQPLTEASYVNLPTIALC+57.021NTDSPLR+3.988	tr|A0A0C4DG17|A0A0C4DG17_HUMAN;tr|C9J9K3|C9J9K3_HUMAN;sp|P08865|RSSA_HUMAN	28275232	6.01053e+06	59387220	12237431	46525972	90992232	0	FALSE
ELQNAPDAIPESGVEPPALDTAWVEATR+3.988	tr|C9JFE4|C9JFE4_HUMAN;tr|A8K070|A8K070_HUMAN;tr|A0A096LP07|A0A096LP07_HUMAN;tr|J3KRJ4|J3KRJ4_HUMAN;tr|J3KTB0|J3KTB0_HUMAN;tr|J3KSA5|J3KSA5_HUMAN;tr|J3QLT0|J3QLT0_HUMAN;tr|J3QS88|J3QS88_HUMAN;tr|A0A096LPJ3|A0A096LPJ3_HUMAN;sp|Q13098|CSN1_HUMAN;sp|Q13098-5|CSN1_HUMAN;sp|Q13098-7|CSN1_HUMAN	14556676	2.12265e+06	29167980	8873100	24479140	46715868	0	FALSE
AEPEAGEEQAGDDR+3.988DSGGPVLQFDYEAVANR+3.988	sp|P56182|RRP1_HUMAN	5065953	3419752	12269574	0	10442074	20265236	0	FALSE
FSNTGEDWYVLVGVAK+4.025	sp|Q15393|SF3B3_HUMAN;sp|Q15393-3|SF3B3_HUMAN	10105674	2.5036e+06	19144862	11253321	22600416	31995842	0	FALSE
M+15.995QHLNPDPQLIPEQITTDITPEC+57.021LVSPR+3.988	tr|A0A0U1RRM8|A0A0U1RRM8_HUMAN;tr|H0YJ34|H0YJ34_HUMAN;tr|H0YJB6|H0YJB6_HUMAN;sp|Q96AC1|FERM2_HUMAN;sp|Q96AC1-2|FERM2_HUMAN;sp|Q96AC1-3|FERM2_HUMAN	8.24244e+06	0	16519248	10753510	9023504	21686848	0	FALSE
YGIVDYMIEQSGPPSK+4.025EILTLK+4.025	sp|P13667|PDIA4_HUMAN	21824012	15413728	69837896	15704143	60374920	126556888	0	FALSE
GIFPVLC+57.021K+4.025DPVQEAWAEDVDLR+3.988	tr|B4DNK4|B4DNK4_HUMAN;tr|H3BR70|H3BR70_HUMAN;sp|P14618|KPYM_HUMAN;sp|P14618-2|KPYM_HUMAN;sp|P14618-3|KPYM_HUMAN	14243036	6439186	49539304	12238988	41258100	70803496	0	FALSE
SGK+4.025TELAEPIAIR+3.988PTSETVMYPAYAK+4.025	sp|P07814|SYEP_HUMAN	86053616	30303640	152323280	14053857	147965904	201880688	0	FALSE
GISLNPEQWSQLK+4.025EQISDIDDAVR+3.988	sp|P53999|TCP4_HUMAN	3134089	2.64995e+06	9679072	0	9783573	11540410	0	FALSE
K+4.025LASQGDSISSQLGPIHPPPR+3.988	tr|M0R0I5|M0R0I5_HUMAN;tr|A0A087WTP3|A0A087WTP3_HUMAN;sp|Q92945|FUBP2_HUMAN	12929956	4760527	29092642	0	40018616	65821260	0	FALSE
DAAAEYDELAEPQDFQDDPDIIAFR+3.988	sp|Q9UJW0|DCTN4_HUMAN;sp|Q9UJW0-2|DCTN4_HUMAN;sp|Q9UJW0-3|DCTN4_HUMAN	3413701	577582	6401433	2.20949e+06	5.44486e+06	13392572	0	FALSE
DINAYNC+57.021EEPTEK+4.025LPFPIIDDR+3.988	sp|P30041|PRDX6_HUMAN	3.59628e+06	1.65284e+06	12708208	0	6.20294e+06	13338060	0	FALSE
NVQAEEMVEFSSGLK+4.025	tr|K7EQH4|K7EQH4_HUMAN;tr|K7EK77|K7EK77_HUMAN;tr|K7ERX7|K7ERX7_HUMAN;tr|K7EJP1|K7EJP1_HUMAN;sp|P25705|ATPA_HUMAN;sp|P25705-2|ATPA_HUMAN;sp|P25705-3|ATPA_HUMAN	30822446	12561451	77009384	9906748	77733616	136748400	0	FALSE
GDATVSYEDPPTAK+4.025	tr|A0A0D9SFL3|A0A0D9SFL3_HUMAN;tr|H7BY36|H7BY36_HUMAN;tr|B0QYK0|B0QYK0_HUMAN;tr|C9JGE3|C9JGE3_HUMAN;sp|Q01844|EWS_HUMAN;sp|Q01844-2|EWS_HUMAN;sp|Q01844-3|EWS_HUMAN;sp|Q01844-5|EWS_HUMAN;sp|Q01844-6|EWS_HUMAN	7.38829e+06	1.84676e+06	11721627	1.16075e+06	10687390	22451246	0	FALSE
ALVLDC+57.021HYPEDEVGQEDEAESDIFSIR+3.988	tr|I3L3Q7|I3L3Q7_HUMAN;tr|I3L3B0|I3L3B0_HUMAN;sp|Q07021|C1QBP_HUMAN	210527184	68488368	565747776	102306728	585376512	984092288	0	FALSE
DIHTLAQLISAYSLVDPEK+4.025AK+4.025	sp|O76094|SRP72_HUMAN;sp|O76094-2|SRP72_HUMAN	5.4997e+06	3.47582e+06	15203888	1.1503e+06	16518420	34876876	0	FALSE
AFTGFIVEADTPGIQIGR+3.988	tr|Q5T4U5|Q5T4U5_HUMAN;tr|B7Z9I1|B7Z9I1_HUMAN;sp|P11310|ACADM_HUMAN;sp|P11310-2|ACADM_HUMAN	13725299	0	20022854	946644	22444892	22023296	0	FALSE
TK+4.025QFIDSNPNQPLVILEMESGASAK+4.025	sp|P49588|SYAC_HUMAN;sp|P49588-2|SYAC_HUMAN	4.71534e+06	2000769	18767660	2.54098e+06	11482333	21364070	0	FALSE
FGAQQDTIEVPEK+4.025DLVDK+4.025AR+3.988	tr|H0Y8E6|H0Y8E6_HUMAN;sp|P49736|MCM2_HUMAN	20742778	17087726	42104304	26702416	42856928	124335304	0	FALSE
ELAPYDENWFYTR+3.988	tr|M0QYF7|M0QYF7_HUMAN;tr|M0R2L9|M0R2L9_HUMAN;tr|M0R140|M0R140_HUMAN;tr|M0QXK4|M0QXK4_HUMAN;sp|P39019|RS19_HUMAN	48072576	8716676	80775640	948223	69939096	134844480	0	FALSE
GDWSVGAPGGVQEITYTVPADK+4.025C+57.021GLVIGK+4.025	sp|Q96I24|FUBP3_HUMAN	13925802	8417949	19982764	2.42909e+06	19619726	29939992	0	FALSE
YIYDQC+57.021PAVAGYGPIEQLPDYNR+3.988	sp|P31930|QCR1_HUMAN	89779096	20764840	168666896	34390084	181331200	280888640	0	FALSE
GAEEMETVIPVDVMR+3.988	tr|K7ELW0|K7ELW0_HUMAN;sp|Q99497|PARK7_HUMAN	77045624	28140750	179026256	8498814	161109888	248662832	0	FALSE
VDEFPLC+57.021GHM+15.995VSDEYEQLSSEALEAAR+3.988	tr|B8A6G2|B8A6G2_HUMAN;tr|X1WI28|X1WI28_HUMAN;tr|A6QRI9|A6QRI9_HUMAN;sp|P27635|RL10_HUMAN	4283481	654649	3.87001e+06	3581376	2.51481e+06	8419191	0	FALSE
ADIK+4.025SPSLDVTVPEAELNLETPEISVGGK+4.025	sp|Q09666|AHNK_HUMAN	7.25955e+06	10282395	14615260	10201414	19951104	9822622	0	FALSE
TETQEK+4.025NTLPTK+4.025ETIEQEK+4.025	sp|P63313|TYB10_HUMAN	2.09037e+06	0	2.24245e+06	0	3167163	10668990	0	FALSE
GVTIIGPATVGGIK+4.025PGC+57.021FK+4.025	sp|P53396|ACLY_HUMAN;sp|P53396-2|ACLY_HUMAN;sp|P53396-3|ACLY_HUMAN	128588504	47612868	410543008	404449056	219556960	288857952	0	FALSE
ADTQTYQPYNK+4.025DWIK+4.025	sp|P84090|ERH_HUMAN	21464374	10888568	53851788	7.13554e+06	59052048	97848456	0	FALSE
YALQMEQLNGILLHLESELAQTR+3.988	tr|F8VZY9|F8VZY9_HUMAN;sp|P05783|K1C18_HUMAN	20388476	3.92985e+06	42715380	21509508	0	104547008	0	FALSE
SDMYILNESLTDPAIVK+4.025	sp|Q01780|EXOSX_HUMAN;sp|Q01780-2|EXOSX_HUMAN	2.00706e+06	1.56246e+06	7567589	1.02143e+06	7.56657e+06	16476328	0	FALSE
QGTPLIAFSLLPHEQK+4.025	tr|I3L4E8|I3L4E8_HUMAN;sp|Q2NL82|TSR1_HUMAN	7323175	2.1865e+06	6.90664e+06	3.28052e+06	4.00486e+06	10629399	0	FALSE
DINAYNC+57.021EEPTEK+4.025LPFPIIDDR+3.988	sp|P30041|PRDX6_HUMAN	85987688	36142032	208283584	26931998	176787120	281427776	0	FALSE
ALSAIADLLTNEHER+3.988	tr|C9JZR2|C9JZR2_HUMAN;sp|O60716|CTND1_HUMAN;sp|O60716-2|CTND1_HUMAN;sp|O60716-3|CTND1_HUMAN;sp|O60716-4|CTND1_HUMAN;sp|O60716-5|CTND1_HUMAN;sp|O60716-6|CTND1_HUMAN;sp|O60716-7|CTND1_HUMAN;sp|O60716-8|CTND1_HUMAN;sp|O60716-9|CTND1_HUMAN;sp|O60716-10|CTND1_HUMAN;sp|O60716-11|CTND1_HUMAN;sp|O60716-12|CTND1_HUMAN;sp|O60716-13|CTND1_HUMAN;sp|O60716-14|CTND1_HUMAN;sp|O60716-15|CTND1_HUMAN;sp|O60716-16…	2.02761e+06	728600	4.09257e+06	536531	9463537	24502158	0	FALSE
SLQADTTNTDTALTTLEEALAEK+4.025ER+3.988	tr|X6RLX0|X6RLX0_HUMAN;tr|X6RM00|X6RM00_HUMAN;tr|G8JLD3|G8JLD3_HUMAN;sp|Q8IUD2|RB6I2_HUMAN;sp|Q8IUD2-2|RB6I2_HUMAN;sp|Q8IUD2-3|RB6I2_HUMAN;sp|Q8IUD2-4|RB6I2_HUMAN;sp|Q8IUD2-5|RB6I2_HUMAN	7178606	5.7378e+06	26055266	2.96297e+06	25862644	49178348	0	FALSE
TAAQC+57.021LEHYEFLLDK+4.025	sp|Q99459|CDC5L_HUMAN	18106478	6.73527e+06	38513912	5.01781e+06	42057596	81599112	0	FALSE
SGFNLEELEK+4.025NNAQSIR+3.988	sp|Q9BVP2|GNL3_HUMAN;sp|Q9BVP2-2|GNL3_HUMAN	41298328	19655090	35343516	0	46599072	27890296	0	FALSE
M+15.995YSYVTEELPQLINANFPVDPQR+3.988	tr|H7BZT7|H7BZT7_HUMAN;tr|X6RA14|X6RA14_HUMAN;sp|P10768|ESTD_HUMAN	4804754	1.02143e+06	9014770	8.00027e+06	8616121	27207782	0	FALSE
ITNDFYPEEDGK+4.025TK+4.025	tr|C9JZG1|C9JZG1_HUMAN;sp|P55884|EIF3B_HUMAN;sp|P55884-2|EIF3B_HUMAN	10051157	5.32979e+06	27164808	3.48452e+06	23892090	49190628	0	FALSE
ISMPDFDLNLK+4.025GPK+4.025	sp|Q09666|AHNK_HUMAN	21414084	7.74044e+06	41497708	4.37018e+06	41264060	66391704	0	FALSE
NIEIDSPYEISR+3.988APDELHYTYLDTFGR+3.988PVIVAYK+4.025K+4.025	tr|B7Z4L4|B7Z4L4_HUMAN;sp|P04843|RPN1_HUMAN	49594888	28170462	126179136	20781168	151224880	291396160	0	FALSE
LM+15.995EPIYLVEIQC+57.021PEQVVGGIYGVLNR+3.988	sp|P13639|EF2_HUMAN	31269286	6.00098e+06	88964920	56024796	87573848	80961216	0	FALSE
YYVTIIDAPGHR+3.988DFIK+4.025	tr|A0A087WV01|A0A087WV01_HUMAN;tr|A0A087WVQ9|A0A087WVQ9_HUMAN;tr|Q5JR01|Q5JR01_HUMAN;tr|A6PW80|A6PW80_HUMAN;sp|Q5VTE0|EF1A3_HUMAN;sp|P68104|EF1A1_HUMAN;sp|P68104-2|EF1A1_HUMAN	16011533	4.32781e+06	44302672	0	35270332	68649032	0	FALSE
DGNASGTTLLEALDC+57.021ILPPTR+3.988PTDK+4.025PLR+3.988LPLQDVYK+4.025	tr|A0A087WV01|A0A087WV01_HUMAN;tr|A0A087WVQ9|A0A087WVQ9_HUMAN;sp|Q5VTE0|EF1A3_HUMAN;sp|P68104|EF1A1_HUMAN;sp|P68104-2|EF1A1_HUMAN	41975740	0	47135660	0	38368092	43520600	0	FALSE
HSDVLFLAVK+4.025PHIIPFILDEIGADVQAR+3.988	tr|A0A087WZF0|A0A087WZF0_HUMAN;tr|A0A087WX69|A0A087WX69_HUMAN;tr|A0A087WTV6|A0A087WTV6_HUMAN;tr|J3KR12|J3KR12_HUMAN;sp|Q96C36|P5CR2_HUMAN	2.62311e+06	2.04484e+06	3.08517e+06	0	0	1.34369e+06	0.000829187	FALSE
LNEAK+4.025EEFTSGGPLGQK+4.025	sp|P43034|LIS1_HUMAN;sp|P43034-2|LIS1_HUMAN	8844864	1.09322e+06	21425046	9323076	19214958	42897180	0	FALSE
ILHTLLASGEDALDFTQESEPSYISDVGPPGR+3.988	tr|H3BM93|H3BM93_HUMAN;tr|H3BMX0|H3BMX0_HUMAN;tr|H3BP95|H3BP95_HUMAN;tr|H3BVG0|H3BVG0_HUMAN;sp|Q8N1F7|NUP93_HUMAN;sp|Q8N1F7-2|NUP93_HUMAN	7232100	725009	12450623	3.76155e+06	18729432	30242314	0	FALSE
VLGQLTETGVVSPEQFMK+4.025	tr|G3V4W4|G3V4W4_HUMAN;sp|Q96EK6|GNA1_HUMAN	14438304	3.78492e+06	28274294	5.81004e+06	24600794	53073128	0	FALSE
NIEIDSPYEISR+3.988APDELHYTYLDTFGR+3.988PVIVAYK+4.025K+4.025	tr|B7Z4L4|B7Z4L4_HUMAN;sp|P04843|RPN1_HUMAN	13112394	5547876	24976760	3.71692e+06	36000532	62316684	0	FALSE
ILIANTGMDTDK+4.025IK+4.025	tr|F5GWF6|F5GWF6_HUMAN;tr|F8VQ14|F8VQ14_HUMAN;sp|P78371|TCPB_HUMAN;sp|P78371-2|TCPB_HUMAN	40235148	17015492	97770936	10356182	91213992	192118368	0	FALSE
NPEVGLK+4.025PVWYSPK+4.025	tr|V9GYZ6|V9GYZ6_HUMAN;sp|P07814|SYEP_HUMAN	18071340	17157804	35862056	14804785	37169388	46785864	0	FALSE
MLPTIIADNAGYDSADLVAQLR+3.988	tr|F5GWF6|F5GWF6_HUMAN;sp|P78371|TCPB_HUMAN;sp|P78371-2|TCPB_HUMAN	3.77885e+06	584749	4139350	3.65422e+06	2.15801e+06	4.31921e+06	0	FALSE
GLSEDTTEETLK+4.025ESFDGSVR+3.988	tr|H7BY16|H7BY16_HUMAN;sp|P19338|NUCL_HUMAN	76596960	21782940	208724720	32969098	193512752	298213216	0	FALSE
IVPTDMNDQNLEEPSR+3.988	tr|A0A087WZ62|A0A087WZ62_HUMAN;tr|H0YCW6|H0YCW6_HUMAN;sp|Q9H6U8|ALG9_HUMAN;sp|Q9H6U8-2|ALG9_HUMAN;sp|Q9H6U8-3|ALG9_HUMAN;sp|Q9H6U8-4|ALG9_HUMAN	0	32375628	48567844	129719776	0	138484240	0	FALSE
SLNLPVGSSQVLVPR+3.988	tr|F8WBH5|F8WBH5_HUMAN;sp|Q14997|PSME4_HUMAN	11332797	1.68911e+06	11912706	2.11477e+06	10869189	31244460	0	FALSE
AGAIAPC+57.021EVTVPAQNTGLGPEK+4.025	tr|G3V210|G3V210_HUMAN;tr|F8VRK7|F8VRK7_HUMAN;tr|F8VPE8|F8VPE8_HUMAN;tr|F8VWS0|F8VWS0_HUMAN;tr|F8VU65|F8VU65_HUMAN;tr|F8VQY6|F8VQY6_HUMAN;tr|F8VW21|F8VW21_HUMAN;sp|P05388|RLA0_HUMAN;sp|P05388-2|RLA0_HUMAN;sp|Q8NHW5|RLA0L_HUMAN	158517200	58119932	298955072	147964704	246528448	490374240	0	FALSE
R+3.988AEDGSVIDYELIDQDAR+3.988DLYDAGVK+4.025	tr|H0YMD0|H0YMD0_HUMAN;tr|H0YL33|H0YL33_HUMAN;tr|H0YN42|H0YN42_HUMAN;tr|H0YMU9|H0YMU9_HUMAN;tr|H0YM50|H0YM50_HUMAN;tr|H0YN28|H0YN28_HUMAN;tr|H0YNP5|H0YNP5_HUMAN;sp|P07355|ANXA2_HUMAN;sp|P07355-2|ANXA2_HUMAN	19558926	8725276	50668988	8102345	48256192	114412400	0	FALSE
LPVITC+57.021YADAK+4.025PGLQTHGFIIR+3.988	tr|A0A3B3IUD7|A0A3B3IUD7_HUMAN;sp|Q14690|RRP5_HUMAN	6741418	5.43444e+06	20217538	7924162	21289352	31961188	0	FALSE
SFVWHALDYADELPK+4.025PEQLAIR+3.988	sp|P49792|RBP2_HUMAN	8836042	506737	40469732	42621312	173736928	160466304	0	FALSE
K+4.025EPVYLSGYGVELAIK+4.025	sp|Q9NYU2|UGGG1_HUMAN;sp|Q9NYU2-2|UGGG1_HUMAN	5.01316e+06	3.13807e+06	15487806	3.54818e+06	10988616	23129878	0	FALSE
TAFDEAIAELDTLSEESYK+4.025DSTLIM+15.995QLLR+3.988	tr|H0YB80|H0YB80_HUMAN;tr|E7EX29|E7EX29_HUMAN;tr|B0AZS6|B0AZS6_HUMAN;tr|B7Z2E6|B7Z2E6_HUMAN;sp|P63104|1433Z_HUMAN;sp|P63104-2|1433Z_HUMAN	70777496	81959240	96768920	85130976	163049312	64693792	0	FALSE
DINAYNC+57.021EEPTEK+4.025LPFPIIDDR+3.988	sp|P30041|PRDX6_HUMAN	4.03583e+06	3702981	11779798	0	7.97124e+06	10954809	0	FALSE
VVGFHVLGPNAGEVTQGFAAALK+4.025	tr|E2QRB9|E2QRB9_HUMAN;tr|F8W809|F8W809_HUMAN;tr|E9PIR7|E9PIR7_HUMAN;tr|A0A087WSW9|A0A087WSW9_HUMAN;tr|A0A182DWI3|A0A182DWI3_HUMAN;tr|A0A087WSY9|A0A087WSY9_HUMAN;sp|Q16881|TRXR1_HUMAN;sp|Q16881-2|TRXR1_HUMAN;sp|Q16881-3|TRXR1_HUMAN;sp|Q16881-4|TRXR1_HUMAN;sp|Q16881-5|TRXR1_HUMAN;sp|Q16881-6|TRXR1_HUMAN;sp|Q16881-7|TRXR1_HUMAN	17785990	5.09992e+06	29596230	10248311	28345946	60481112	0	FALSE
LDGLVETPTGYIESLPR+3.988	tr|B7Z9C2|B7Z9C2_HUMAN;tr|F8W0J6|F8W0J6_HUMAN;tr|F8VRJ2|F8VRJ2_HUMAN;tr|H0YHC3|H0YHC3_HUMAN;tr|F8W118|F8W118_HUMAN;tr|F8VV59|F8VV59_HUMAN;tr|F8W020|F8W020_HUMAN;tr|H0YIV4|H0YIV4_HUMAN;tr|F5H4R6|F5H4R6_HUMAN;tr|F8VUX1|F8VUX1_HUMAN;tr|F8VY35|F8VY35_HUMAN;tr|F8VXI6|F8VXI6_HUMAN;sp|P55209|NP1L1_HUMAN;sp|P55209-2|NP1L1_HUMAN;sp|P55209-3|NP1L1_HUMAN	180749488	52387392	313246176	41115012	340816352	680000320	0	FALSE
YDYNSGEELESYK+4.025	tr|H0YH33|H0YH33_HUMAN;sp|Q9Y3F4|STRAP_HUMAN;sp|Q9Y3F4-2|STRAP_HUMAN	6.77731e+06	0	15297118	1.37248e+06	15071168	36779096	0	FALSE
WENPTQNNAGLEDFER+3.988	tr|B1APF9|B1APF9_HUMAN;tr|B1APG0|B1APG0_HUMAN;tr|B1APG1|B1APG1_HUMAN;tr|B1APG2|B1APG2_HUMAN;tr|B1APG3|B1APG3_HUMAN;tr|A0A0A0MS54|A0A0A0MS54_HUMAN;tr|B1APF8|B1APF8_HUMAN;tr|B1APF7|B1APF7_HUMAN;sp|P22694|KAPCB_HUMAN;sp|P22694-2|KAPCB_HUMAN;sp|P22694-3|KAPCB_HUMAN;sp|P22694-4|KAPCB_HUMAN;sp|P22694-5|KAPCB_HUMAN;sp|P22694-6|KAPCB_HUMAN;sp|P22694-7|KAPCB_HUMAN;sp|P22694-8|KAPCB_HUMAN;sp|P22694-9|KAPCB…	0	0	1.66593e+06	0	1103475	978343	0	FALSE
TYNASITLQQQLK+4.025ELTAPDENIPAK+4.025	sp|P11387|TOP1_HUMAN	9024792	0	9497575	2851810	5984199	24012782	0	FALSE
SVGGSGGGSFGDNLVTR+3.988	tr|A0A0C4DGC5|A0A0C4DGC5_HUMAN;sp|P02545|LMNA_HUMAN;sp|P02545-3|LMNA_HUMAN;sp|P02545-4|LMNA_HUMAN;sp|P02545-5|LMNA_HUMAN	5.2842e+06	652182	7727648	154096	7.59124e+06	19094642	0	FALSE
ALNALC+57.021DGLIDELNQALK+4.025	sp|P30084|ECHM_HUMAN	24497220	9086827	57806064	3.86925e+06	40087564	71880224	0	FALSE
VSGGLEVLAEK+4.025C+57.021PNLTHLNLSGNK+4.025	tr|H0YN26|H0YN26_HUMAN;sp|P39687|AN32A_HUMAN	62368776	44011712	230785280	36019760	199122224	320036256	0	FALSE
TQLASWSDPTEETGPVAGILDTETLEK+4.025	tr|H0YDN1|H0YDN1_HUMAN;sp|Q15149|PLEC_HUMAN;sp|Q15149-2|PLEC_HUMAN;sp|Q15149-3|PLEC_HUMAN;sp|Q15149-4|PLEC_HUMAN;sp|Q15149-5|PLEC_HUMAN;sp|Q15149-6|PLEC_HUMAN;sp|Q15149-7|PLEC_HUMAN;sp|Q15149-8|PLEC_HUMAN;sp|Q15149-9|PLEC_HUMAN	43575516	11573675	76192984	28993928	84661488	197955536	0	FALSE
TIGGGDDSFNTFFSETGAGK+4.025	tr|F8VRK0|F8VRK0_HUMAN;tr|F8VVB9|F8VVB9_HUMAN;tr|F8VRZ4|F8VRZ4_HUMAN;tr|F8W0F6|F8W0F6_HUMAN;tr|F5H5D3|F5H5D3_HUMAN;tr|F8VWV9|F8VWV9_HUMAN;tr|F8VQQ4|F8VQQ4_HUMAN;tr|F8VX09|F8VX09_HUMAN;tr|A0A1W2PQM2|A0A1W2PQM2_HUMAN;tr|F8VXZ7|F8VXZ7_HUMAN;tr|F8VS66|F8VS66_HUMAN;sp|P68363|TBA1B_HUMAN;sp|P68363-2|TBA1B_HUMAN;sp|P0DPH7|TBA3C_HUMAN;sp|P0DPH7-2|TBA3C_HUMAN;sp|P0DPH8|TBA3D_HUMAN;sp|Q6PEY2|TBA3E_HUMAN;sp…	22862126	7.91049e+06	25814786	25784428	13921835	67026000	0	FALSE
LFYADHPFIFLVR+3.988	tr|E9PKH2|E9PKH2_HUMAN;tr|H0YEP8|H0YEP8_HUMAN;sp|P50454|SERPH_HUMAN	5335706	2304478	5.62887e+06	2.1441e+06	7.97027e+06	9157730	0	FALSE
SGDAAIVDM+15.995VPGK+4.025PMC+57.021VESFSDYPPLGR+3.988	tr|A0A087WVQ9|A0A087WVQ9_HUMAN;sp|Q5VTE0|EF1A3_HUMAN;sp|P68104|EF1A1_HUMAN;sp|P68104-2|EF1A1_HUMAN	2.82171e+06	14026016	17601324	0	12841175	3.12473e+06	0	FALSE
ATTPVIMVGPGTGVAPFIGFIQER+3.988	tr|E7EMD0|E7EMD0_HUMAN;tr|H0Y4R2|H0Y4R2_HUMAN;sp|P16435|NCPR_HUMAN	41458872	7.92706e+06	80037920	11345836	63093840	132900472	0	FALSE
AHSNPDFLPVDNC+57.021LQSVLGQR+3.988	sp|Q5VSL9|STRP1_HUMAN;sp|Q5VSL9-2|STRP1_HUMAN	3.28916e+06	1.13543e+06	7.04243e+06	2.54829e+06	9449798	10684405	0	FALSE
EVLQLQEEVK+4.025NFITR+3.988	sp|Q9BYN8|RT26_HUMAN	3.6548e+06	2509960	7321551	3626048	6.68099e+06	4770018	0	FALSE
YLEVSEPQDIEC+57.021C+57.021GALEYYDK+4.025AFDR+3.988	tr|B0QYA5|B0QYA5_HUMAN;sp|O15371|EIF3D_HUMAN;sp|O15371-2|EIF3D_HUMAN;sp|O15371-3|EIF3D_HUMAN	34218740	24107100	94213008	12847284	94620448	179124512	0	FALSE
YGVNPGPIVGTTR+3.988	tr|H0YJH7|H0YJH7_HUMAN;tr|G5E972|G5E972_HUMAN;sp|P42166|LAP2A_HUMAN;sp|P42167|LAP2B_HUMAN;sp|P42167-2|LAP2B_HUMAN;sp|P42167-3|LAP2B_HUMAN	67563392	28202656	147926448	15711499	146062176	267159696	0	FALSE
GPLPLSSQHR+3.988GDADQASNILASFGLSAR+3.988	tr|A8MXP9|A8MXP9_HUMAN;tr|D6R991|D6R991_HUMAN;tr|D6REM6|D6REM6_HUMAN;tr|A0A0R4J2E8|A0A0R4J2E8_HUMAN;sp|P43243|MATR3_HUMAN	18698012	8560616	30180328	2294374	33342276	63664552	0	FALSE
NEEQMK+4.025LPAEGPEPEADSQEQVHPK+4.025	sp|O75459|PAGE1_HUMAN	30264158	19862842	55935740	20419032	71737416	112842864	0	FALSE
ETYEVLLSFIQAALGDQPR+3.988	sp|O75643|U520_HUMAN;sp|O75643-2|U520_HUMAN	9447256	3.31549e+06	16056218	1.44188e+06	19589526	37043552	0	FALSE
TVQVVPHITDAIQEWVMR+3.988	tr|A0A3B3IRQ8|A0A3B3IRQ8_HUMAN;tr|A0A3B3ITB8|A0A3B3ITB8_HUMAN;tr|A0A3B3ITF6|A0A3B3ITF6_HUMAN;tr|A0A3B3IRI2|A0A3B3IRI2_HUMAN;sp|P17812|PYRG1_HUMAN	10835510	6395277	28510998	12935043	16131509	44946880	0	FALSE
FTVVVATQLPESTSLR+3.988	tr|J3QRA5|J3QRA5_HUMAN;tr|J3KRK3|J3KRK3_HUMAN;sp|Q13564|ULA1_HUMAN;sp|Q13564-2|ULA1_HUMAN;sp|Q13564-3|ULA1_HUMAN;sp|Q13564-4|ULA1_HUMAN	12747658	342354	23138496	2475434	26104960	34424060	0	FALSE
VTYHPDGPEGQAYDVDFTPPFR+3.988R+3.988	sp|Q15046|SYK_HUMAN;sp|Q15046-2|SYK_HUMAN	98528544	48522820	214070032	24852854	246961632	432377792	0	FALSE
IVEDAPPIDLQAEAQHASGEVEEPPR+3.988YLLK+4.025	tr|C9J2Y9|C9J2Y9_HUMAN;sp|P30876|RPB2_HUMAN	3.54858e+06	5.03273e+06	8511510	2218873	11474266	16950652	0	FALSE
MQHLNPDPQLIPEQITTDITPEC+57.021LVSPR+3.988	tr|A0A0U1RRM8|A0A0U1RRM8_HUMAN;tr|H0YJ34|H0YJ34_HUMAN;tr|H0YJB6|H0YJB6_HUMAN;sp|Q96AC1|FERM2_HUMAN;sp|Q96AC1-2|FERM2_HUMAN;sp|Q96AC1-3|FERM2_HUMAN	23864132	6483201	46480064	23986056	32225714	78477592	0	FALSE
DEFEGLFK+4.025QPAENVNQYLTDPK+4.025	tr|Q5JRR6|Q5JRR6_HUMAN;sp|P22314|UBA1_HUMAN;sp|P22314-2|UBA1_HUMAN	28499222	17894892	70005672	10732854	49642384	90606440	0	FALSE
GTMLGK+4.025IEFEGQPVDFVDPNK+4.025QNLIAEVSTK+4.025	tr|Q5R211|Q5R211_HUMAN;sp|P31327|CPSM_HUMAN;sp|P31327-3|CPSM_HUMAN	15466988	8550030	38924328	7211579	55788116	73174168	0	FALSE
K+4.025QELEEIC+57.021HDLEAR+3.988	sp|P35579|MYH9_HUMAN;sp|P35579-2|MYH9_HUMAN	11238277	7392034	17979934	1.7073e+06	12738127	26789304	0	FALSE
YLEVSEPQDIEC+57.021C+57.021GALEYYDK+4.025	tr|B0QYA5|B0QYA5_HUMAN;sp|O15371|EIF3D_HUMAN;sp|O15371-2|EIF3D_HUMAN;sp|O15371-3|EIF3D_HUMAN	7.22754e+06	3.05994e+06	16309086	6457862	14827258	31368736	0	FALSE
TLTIVDTGIGMTK+4.025ADLINNLGTIAK+4.025	sp|P07900|HS90A_HUMAN;sp|P07900-2|HS90A_HUMAN	7.55384e+06	2.05767e+06	21534278	10792167	18953894	42477468	0	FALSE
TLTLVDTGIGMTK+4.025ADLINNLGTIAK+4.025	sp|P08238|HS90B_HUMAN	7.55384e+06	2.05767e+06	21534278	10792167	18953894	42477468	0	FALSE
SLGEIPIVESEIK+4.025K+4.025EAGELK+4.025PEEEITVGPVQK+4.025	sp|P53618|COPB_HUMAN	54209296	13708867	93766904	8.32505e+06	97953904	187234496	0	FALSE
PVSSAASVYAGAGGSGSR+3.988	tr|F8VZY9|F8VZY9_HUMAN;sp|P05783|K1C18_HUMAN	105780776	38154556	191525552	26848408	130278288	310690144	0	FALSE
GGPEVQQVPAGER+3.988PLWFIC+57.021SGMGTQWR+3.988	tr|A0A0U1RQF0|A0A0U1RQF0_HUMAN;sp|P49327|FAS_HUMAN	42173932	36662492	109918216	9318228	71280480	91161408	0	FALSE
DLVLGPSGVLQGIR+3.988PGK+4.025	tr|K7EMM8|K7EMM8_HUMAN;sp|Q49A26|GLYR1_HUMAN;sp|Q49A26-2|GLYR1_HUMAN;sp|Q49A26-5|GLYR1_HUMAN;sp|Q49A26-3|GLYR1_HUMAN;sp|Q49A26-4|GLYR1_HUMAN	9900698	3.91176e+06	19521846	1.76804e+06	20049588	36226000	0	FALSE
R+3.988MPQAPPSLC+57.021VTPYPEPSEC+57.021SWK+4.025DPEAEAALELALSITR+3.988	tr|A0A140T936|A0A140T936_HUMAN;sp|P26640|SYVC_HUMAN	10021838	7145660	25117668	4.54247e+06	25477278	33264568	0	FALSE
AM+15.995GIM+15.995NSFVNDIFER+3.988	tr|U3KQK0|U3KQK0_HUMAN;sp|Q99877|H2B1N_HUMAN;sp|P23527|H2B1O_HUMAN;sp|P57053|H2BFS_HUMAN;sp|P62807|H2B1C_HUMAN;sp|P58876|H2B1D_HUMAN;sp|Q5QNW6|H2B2F_HUMAN;sp|Q5QNW6-2|H2B2F_HUMAN;sp|P06899|H2B1J_HUMAN;sp|O60814|H2B1K_HUMAN;sp|Q16778|H2B2E_HUMAN;sp|Q93079|H2B1H_HUMAN;sp|Q8N257|H2B3B_HUMAN;sp|P33778|H2B1B_HUMAN;sp|Q99880|H2B1L_HUMAN;sp|Q99879|H2B1M_HUMAN	70382360	22115172	123271896	635356	126185520	233312976	0	FALSE
ELAQQVQQVADDYGK+4.025	tr|A0A1X7SBZ2|A0A1X7SBZ2_HUMAN;tr|A0A1W2PQ51|A0A1W2PQ51_HUMAN;sp|Q92841|DDX17_HUMAN;sp|Q92841-1|DDX17_HUMAN;sp|Q92841-2|DDX17_HUMAN;sp|Q92841-3|DDX17_HUMAN	4071414	8480649	7920518	18430958	9481747	15435226	0	FALSE
SPFVVQVGEAC+57.021NPNAC+57.021R+3.988	tr|E7EN95|E7EN95_HUMAN;sp|O75369|FLNB_HUMAN;sp|O75369-2|FLNB_HUMAN;sp|O75369-3|FLNB_HUMAN;sp|O75369-7|FLNB_HUMAN;sp|O75369-4|FLNB_HUMAN;sp|O75369-5|FLNB_HUMAN;sp|O75369-6|FLNB_HUMAN;sp|O75369-8|FLNB_HUMAN;sp|O75369-9|FLNB_HUMAN	11266595	5.14039e+06	16658687	0	32472906	49809996	0	FALSE
GIFPVLC+57.021K+4.025DPVQEAWAEDVDLR+3.988	tr|B4DNK4|B4DNK4_HUMAN;tr|H3BR70|H3BR70_HUMAN;sp|P14618|KPYM_HUMAN;sp|P14618-2|KPYM_HUMAN;sp|P14618-3|KPYM_HUMAN	376991648	233147712	1131088256	120361096	892907456	1586153088	0	FALSE
M+15.995GLAM+15.995GGGGGASFDR+3.988	tr|A0A087X0X3|A0A087X0X3_HUMAN;tr|M0R2I7|M0R2I7_HUMAN;tr|M0QY96|M0QY96_HUMAN;sp|P52272|HNRPM_HUMAN;sp|P52272-2|HNRPM_HUMAN	98834480	33555980	111616600	100592976	122105872	275335840	0	FALSE
SSVNC+57.021PFSSQDMK+4.025	sp|Q08211|DHX9_HUMAN	29026116	5.81428e+06	27919202	5254855	28312366	55121876	0	FALSE
K+4.025DDPVTNLNNAFEVAEK+4.025	tr|K7EJH8|K7EJH8_HUMAN;sp|O43707|ACTN4_HUMAN	52863420	12602826	112742352	12146767	90829496	176271920	0	FALSE
LDLWNLNNDTEVPTASISVEGNPALNR+3.988	sp|Q13409|DC1I2_HUMAN;sp|Q13409-2|DC1I2_HUMAN;sp|Q13409-3|DC1I2_HUMAN;sp|Q13409-5|DC1I2_HUMAN;sp|Q13409-6|DC1I2_HUMAN;sp|Q13409-7|DC1I2_HUMAN	11109219	10247920	16423628	2.54571e+06	15195891	26812764	0	FALSE
DGNASGTTLLEALDC+57.021ILPPTR+3.988PTDK+4.025PLR+3.988LPLQDVYK+4.025	tr|A0A087WV01|A0A087WV01_HUMAN;tr|A0A087WVQ9|A0A087WVQ9_HUMAN;sp|Q5VTE0|EF1A3_HUMAN;sp|P68104|EF1A1_HUMAN;sp|P68104-2|EF1A1_HUMAN	26008226	20746230	60900024	7945609	54905404	69492888	0	FALSE
TWIEGLTGLSIGPDFQK+4.025	tr|B4DUT8|B4DUT8_HUMAN;tr|K7ES69|K7ES69_HUMAN;tr|A0A087X271|A0A087X271_HUMAN;tr|B4DDF4|B4DDF4_HUMAN;sp|Q99439|CNN2_HUMAN;sp|Q99439-2|CNN2_HUMAN	21076296	10111299	32775670	9168371	36183744	90173672	0	FALSE
VLLSIC+57.021SLLC+57.021DPNPDDPLVPEIAR+3.988	tr|A0A087WY85|A0A087WY85_HUMAN;tr|D6RAH7|D6RAH7_HUMAN;tr|A0A0A0MQU3|A0A0A0MQU3_HUMAN;tr|D6RFM0|D6RFM0_HUMAN;tr|H9KV45|H9KV45_HUMAN;sp|P61077|UB2D3_HUMAN;sp|P61077-2|UB2D3_HUMAN;sp|P61077-3|UB2D3_HUMAN;sp|P62837|UB2D2_HUMAN;sp|P62837-2|UB2D2_HUMAN	26897738	10188350	37005980	11784064	36663792	57016668	0	FALSE
LTAIDILTTC+57.021AADIQR+3.988	tr|B4E0P5|B4E0P5_HUMAN;sp|O75643|U520_HUMAN	1.92011e+06	541246	4.07332e+06	0	6.0211e+06	12262290	0	FALSE
VHLTPYTVDSPIC+57.021DFLELQR+3.988	tr|E5RHJ4|E5RHJ4_HUMAN;sp|Q8N163|CCAR2_HUMAN;sp|Q8N163-2|CCAR2_HUMAN	10396892	3.62572e+06	22254878	5753367	20267882	43359512	0.000209315	FALSE
FNPDFAEAHYLSYLNNLR+3.988	tr|H0YFB5|H0YFB5_HUMAN;tr|F5GY68|F5GY68_HUMAN;tr|F5H0F9|F5H0F9_HUMAN;sp|Q9UJX4|APC5_HUMAN;sp|Q9UJX4-2|APC5_HUMAN;sp|Q9UJX4-3|APC5_HUMAN	6.13192e+06	714315	6.1654e+06	797794	8.19719e+06	16524567	0	FALSE
NAIDDGC+57.021VVPGAGAVEVAMAEALIK+4.025	sp|P40227|TCPZ_HUMAN;sp|P40227-2|TCPZ_HUMAN	0	9313443	22066550	4.44678e+06	11520093	17562230	0	FALSE
AVETPPLSSVNLLEGLSR+3.988	tr|C9IZ08|C9IZ08_HUMAN;tr|H0Y7I9|H0Y7I9_HUMAN;tr|F8W9S7|F8W9S7_HUMAN;tr|A0A0A0MQV8|A0A0A0MQV8_HUMAN;tr|H0Y4E7|H0Y4E7_HUMAN;tr|B0QZ65|B0QZ65_HUMAN;tr|B4DGD8|B4DGD8_HUMAN;sp|Q14C86|GAPD1_HUMAN;sp|Q14C86-2|GAPD1_HUMAN;sp|Q14C86-3|GAPD1_HUMAN;sp|Q14C86-4|GAPD1_HUMAN;sp|Q14C86-5|GAPD1_HUMAN;sp|Q14C86-6|GAPD1_HUMAN	2.93213e+06	162579	14824003	1.49624e+06	17728804	30879710	0.000356979	FALSE
NLEASAVIQGLVK+4.025DR+3.988	sp|Q8IWA0|WDR75_HUMAN	6.3544e+06	1.07213e+06	14627727	347618	19126550	38163080	0	FALSE
LGTDESC+57.021FNMILATR+3.988	sp|P20073|ANXA7_HUMAN;sp|P20073-2|ANXA7_HUMAN	18958440	4.91415e+06	26112814	0	26274884	46360384	0	FALSE
VQELGLSAPLTVLPTITC+57.021GHTIEILR+3.988	tr|H7C2H4|H7C2H4_HUMAN;sp|P35520|CBS_HUMAN;sp|P35520-2|CBS_HUMAN;sp|P0DN79|CBSL_HUMAN	14810367	2.17309e+06	40020864	1.18949e+06	29880806	30804442	0	FALSE
DLEFTIYDDDDVSPFLEGLEER+3.988PQR+3.988K+4.025	tr|F5GX11|F5GX11_HUMAN;sp|P25786|PSA1_HUMAN;sp|P25786-2|PSA1_HUMAN	34866864	13009569	71556128	9097244	79055936	142839216	0	FALSE
NR+3.988EELGFR+3.988PEYSASQLK+4.025	sp|P09874|PARP1_HUMAN	8.38538e+06	4565413	19846616	0	20248688	35265504	0	FALSE
ILLDQVEEAVADFDEC+57.021IR+3.988	sp|O94826|TOM70_HUMAN	15836816	3.48492e+06	11574298	123361	10597928	18761544	0	FALSE
LTESINR+3.988DSEEPFSSVEIQAALSK+4.025	tr|J3KQ69|J3KQ69_HUMAN;sp|P25205|MCM3_HUMAN;sp|P25205-2|MCM3_HUMAN	14912968	11655267	23698168	5348674	40030992	69064192	0	FALSE
ELEYLEEVPPGNVLGIGGLQDFVLK+4.025	sp|Q7Z2Z2|EFL1_HUMAN;sp|Q7Z2Z2-2|EFL1_HUMAN	51035024	53352748	55362612	26899412	77994464	49573760	0.000829187	FALSE
K+4.025EPFTLEAYYSSPQDLPYPDPAIAQFSVQK+4.025	tr|A0A087WYC1|A0A087WYC1_HUMAN;sp|P34932|HSP74_HUMAN	51271308	31885028	132019752	51998152	118586544	211300928	0	FALSE
MTEEEVEMLVAGHEDSNGC+57.021INYEELVR+11.032	tr|F8VZU9|F8VZU9_HUMAN;tr|G8JLA2|G8JLA2_HUMAN;tr|F8W180|F8W180_HUMAN;tr|F8VXL3|F8VXL3_HUMAN;sp|P60660-2|MYL6_HUMAN	3.21033e+06	2.53458e+06	14324869	9013273	124109	38877688	0	FALSE
SNYNFEK+4.025PFLWLAR+3.988	tr|B5MDF5|B5MDF5_HUMAN;tr|B4DV51|B4DV51_HUMAN;tr|F5H018|F5H018_HUMAN;tr|J3KQE5|J3KQE5_HUMAN;sp|P62826|RAN_HUMAN	6.2708e+06	30614074	26053576	27759172	24332458	3.00611e+06	0	FALSE
DLADELALVDVIEDK+4.025LK+4.025GEM+15.995MDLQHGSLFLR+3.988	tr|F5GXY2|F5GXY2_HUMAN;tr|F5GXH2|F5GXH2_HUMAN;tr|F5H5J4|F5H5J4_HUMAN;tr|F5GYU2|F5GYU2_HUMAN;tr|F5H6W8|F5H6W8_HUMAN;sp|P00338|LDHA_HUMAN;sp|P00338-2|LDHA_HUMAN;sp|P00338-3|LDHA_HUMAN;sp|P00338-4|LDHA_HUMAN;sp|P00338-5|LDHA_HUMAN	5568170	0	8.2633e+06	668271	8170306	8053021	0	FALSE
PVSSAASVYAGAGGSGSR+3.988	tr|F8VZY9|F8VZY9_HUMAN;sp|P05783|K1C18_HUMAN	129484040	28957258	198443360	26194370	130671552	305392096	0	FALSE
FK+4.025GPFTDVVTTNLK+4.025	sp|Q9P0L0|VAPA_HUMAN;sp|Q9P0L0-2|VAPA_HUMAN	14052590	12699191	27220130	0	19275294	54900608	0	FALSE
LFDSDPITVTVPVEVSR+3.988	tr|H0YAS8|H0YAS8_HUMAN;sp|P10909|CLUS_HUMAN;sp|P10909-2|CLUS_HUMAN;sp|P10909-3|CLUS_HUMAN;sp|P10909-4|CLUS_HUMAN;sp|P10909-5|CLUS_HUMAN	13808052	5312017	18809394	789302	6093010	13406727	0	FALSE
MK+4.025EIAEAYLGYPVTNAVITVPAYFNDSQR+3.988	tr|A0A0G2JIW1|A0A0G2JIW1_HUMAN;sp|P0DMV9|HS71B_HUMAN;sp|P0DMV8|HS71A_HUMAN	30260304	41718540	165220880	0	119690424	255794016	0	FALSE
GIHSAIDASQTPDVVFASILAAFSK+4.025	tr|F8VY04|F8VY04_HUMAN;tr|F8W1A4|F8W1A4_HUMAN;sp|P54819|KAD2_HUMAN;sp|P54819-2|KAD2_HUMAN;sp|P54819-5|KAD2_HUMAN;sp|P54819-6|KAD2_HUMAN	25789130	0	36145564	11064473	36844572	50350960	0	FALSE
HIGLVYSGM+15.995GPDYR+3.988	tr|A0A024RA52|A0A024RA52_HUMAN;sp|P25787|PSA2_HUMAN	9242274	2541557	18825424	975505	16940448	35024940	0	FALSE
GLYGIK+4.025DDVFLSVPC+57.021ILGQNGISDLVK+4.025	sp|P00338|LDHA_HUMAN;sp|P00338-3|LDHA_HUMAN;sp|P00338-4|LDHA_HUMAN	6062622	0	15530399	10394312	11510075	15327930	0	FALSE
ALLELQLEPEELYQTFQR+3.988	sp|P13639|EF2_HUMAN	135896528	43175552	249569104	56674500	200608256	502131328	0	FALSE
FESLEPEMNNQASR+3.988	tr|A0A087WUZ3|A0A087WUZ3_HUMAN;sp|Q01082|SPTB2_HUMAN;sp|Q01082-2|SPTB2_HUMAN;sp|Q01082-3|SPTB2_HUMAN	0	1.46988e+06	1.71569e+06	78443.2	4395825	3.54039e+06	0.000106883	FALSE
GPLPLSSQHR+3.988GDADQASNILASFGLSAR+3.988	tr|A8MXP9|A8MXP9_HUMAN;tr|D6R991|D6R991_HUMAN;tr|D6REM6|D6REM6_HUMAN;tr|A0A0R4J2E8|A0A0R4J2E8_HUMAN;sp|P43243|MATR3_HUMAN	16559729	7.32882e+06	30150730	2.95503e+06	32261724	62090924	0	FALSE
HFVDSHHQK+4.025PVNAIIEHVR+3.988	sp|Q7KZF4|SND1_HUMAN	46203048	23036852	104749344	6569442	83117288	153548432	0	FALSE
AFADAMEVIPSTLAENAGLNPISTVTELR+3.988	sp|P50991|TCPD_HUMAN;sp|P50991-2|TCPD_HUMAN	11569545	3.60791e+06	21927620	8658121	20689794	51250868	0	FALSE
LSDC+57.021GLGDLAITSLLLLNQC+57.021LEELQGVR+3.988	tr|A0A3B3IUD7|A0A3B3IUD7_HUMAN;sp|Q14690|RRP5_HUMAN	4080302	2.03142e+06	4988873	1.31149e+06	6192972	13267692	0	FALSE
GIHSAIDASQTPDVVFASILAAFSK+4.025	tr|F8VY04|F8VY04_HUMAN;tr|F8W1A4|F8W1A4_HUMAN;sp|P54819|KAD2_HUMAN;sp|P54819-2|KAD2_HUMAN;sp|P54819-5|KAD2_HUMAN;sp|P54819-6|KAD2_HUMAN	40626128	20285944	30759076	0	33357122	0	0	FALSE
LPVITC+57.021YADAK+4.025PGLQTHGFIIR+3.988	tr|A0A3B3IUD7|A0A3B3IUD7_HUMAN;sp|Q14690|RRP5_HUMAN	12679685	12740332	18986704	4.2527e+06	19675840	32388116	0	FALSE
K+4.025HPDASVNFSEFSK+4.025	tr|Q5T7C4|Q5T7C4_HUMAN;sp|P09429|HMGB1_HUMAN	3.28678e+06	3.9281e+06	6160607	4.04667e+06	6316165	13291661	0	FALSE
TLLLGDNQLSQLSPHVGALR+3.988	sp|Q6NSJ5|LRC8E_HUMAN	2.89889e+06	2.08562e+06	5532866	857415	6959643	13877335	0	FALSE
DLEFTIYDDDDVSPFLEGLEER+3.988PQR+3.988K+4.025	tr|F5GX11|F5GX11_HUMAN;sp|P25786|PSA1_HUMAN;sp|P25786-2|PSA1_HUMAN	22029638	5.30492e+06	20069006	3061307	22394312	51311880	0	FALSE
GIFPVLC+57.021K+4.025DPVQEAWAEDVDLR+3.988	tr|B4DNK4|B4DNK4_HUMAN;tr|H3BR70|H3BR70_HUMAN;sp|P14618|KPYM_HUMAN;sp|P14618-2|KPYM_HUMAN;sp|P14618-3|KPYM_HUMAN	374724416	230627376	1151250304	124344032	879923392	1579190400	0	FALSE
FFQPTEMAAQDFFQR+3.988	sp|O95782|AP2A1_HUMAN;sp|O95782-2|AP2A1_HUMAN	5029524	1.28198e+06	11893316	0	13687783	22508618	0	FALSE
GDLGIEIPAEK+4.025VFLAQK+4.025	tr|B4DNK4|B4DNK4_HUMAN;tr|H3BR70|H3BR70_HUMAN;tr|H3BTN5|H3BTN5_HUMAN;sp|P14618|KPYM_HUMAN;sp|P14618-2|KPYM_HUMAN;sp|P14618-3|KPYM_HUMAN;sp|P30613|KPYR_HUMAN;sp|P30613-2|KPYR_HUMAN	43172132	17610952	138006128	14615552	116978016	253040944	0	FALSE
SLGEIPIVESEIK+4.025K+4.025EAGELK+4.025PEEEITVGPVQK+4.025	sp|P53618|COPB_HUMAN	52804516	19312056	102304312	11481064	113343696	207832144	0	FALSE
SGK+4.025TELAEPIAIR+3.988PTSETVMYPAYAK+4.025	sp|P07814|SYEP_HUMAN	17798604	11853966	51407656	4894229	55791248	73097360	0	FALSE
NFPNAIEHTLQWAR+3.988	sp|P22314|UBA1_HUMAN;sp|P22314-2|UBA1_HUMAN	8433462	3.72875e+06	19655012	39146.9	19926216	29741598	0	FALSE
GLQSYYAVAHAVTER+3.988	tr|A0A2R8Y7S2|A0A2R8Y7S2_HUMAN;tr|A0A2R8YCY3|A0A2R8YCY3_HUMAN;tr|A0A2R8YF58|A0A2R8YF58_HUMAN;tr|A0A2R8Y440|A0A2R8Y440_HUMAN;tr|A0A2R8YGP5|A0A2R8YGP5_HUMAN;tr|A0A2R8Y4C5|A0A2R8Y4C5_HUMAN;tr|A0A2R8YGG3|A0A2R8YGG3_HUMAN;tr|A0A2R8Y6V2|A0A2R8Y6V2_HUMAN;tr|A0A2R8Y7F3|A0A2R8Y7F3_HUMAN;tr|A0A2R8YF80|A0A2R8YF80_HUMAN;tr|A0A2R8Y6N0|A0A2R8Y6N0_HUMAN;tr|A0A2R8Y4P4|A0A2R8Y4P4_HUMAN;tr|A0A2R8YG32|A0A2R8YG32_HU…	812842	0	1.55777e+06	1.34499e+06	1.99894e+06	4446127	0	FALSE
ANDTTFGLAAGVFTR+3.988	sp|P49189|AL9A1_HUMAN;sp|P49189-2|AL9A1_HUMAN;sp|P49189-3|AL9A1_HUMAN	9135207	4074903	25843016	658307	26688886	44785596	0	FALSE
TK+4.025QFIDSNPNQPLVILEMESGASAK+4.025	sp|P49588|SYAC_HUMAN;sp|P49588-2|SYAC_HUMAN	2832884	309488	12760452	669258	13974589	20899774	0	FALSE
IEK+4.025ELEAVC+57.021QDVLSLLDNYLIK+4.025	sp|P61981|1433G_HUMAN	10012359	3.16841e+06	15592174	16225219	14142398	27574234	0	FALSE
SGK+4.025TELAEPIAIR+3.988PTSETVM+15.995YPAYAK+4.025	sp|P07814|SYEP_HUMAN	33537228	13325639	67964544	22893892	57255172	84850064	0	FALSE
FSVPGFK+4.025AEGPEVDVNLPK+4.025ADVDISGPK+4.025	sp|Q09666|AHNK_HUMAN	22583374	12387587	56271432	5.55122e+06	41325484	71386520	0	FALSE
DLNQLFQQDSSSR+3.988	tr|X6RLX0|X6RLX0_HUMAN;tr|X6RM00|X6RM00_HUMAN;tr|G8JLD3|G8JLD3_HUMAN;tr|A0A0U1RQM4|A0A0U1RQM4_HUMAN;tr|K7EPP6|K7EPP6_HUMAN;sp|Q8IUD2|RB6I2_HUMAN;sp|Q8IUD2-2|RB6I2_HUMAN;sp|Q8IUD2-3|RB6I2_HUMAN;sp|Q8IUD2-4|RB6I2_HUMAN	13323567	4.78808e+06	21478036	2624562	19827846	43060528	0	FALSE
TGTSC+57.021ALDC+57.021GAGIGR+3.988	sp|Q9BV86|NTM1A_HUMAN;sp|Q9BV86-2|NTM1A_HUMAN	5464041	6.6749e+06	13586200	7547.76	14731464	32410866	0	FALSE
AVNTQALSGAGILR+3.988	sp|O60749|SNX2_HUMAN;sp|O60749-2|SNX2_HUMAN	37671976	5.9414e+06	71141304	0	67155616	165841360	0	FALSE
NR+3.988DVEETLFQVAHDPDC+57.021GDVVR+3.988	sp|Q96BW9|TAM41_HUMAN;sp|Q96BW9-2|TAM41_HUMAN;sp|Q96BW9-3|TAM41_HUMAN	0	807344	4.32821e+06	445260	4926228	15133221	0.000829187	FALSE
IGNTGGM+15.995LDNILASK+4.025	sp|P53396|ACLY_HUMAN;sp|P53396-2|ACLY_HUMAN;sp|P53396-3|ACLY_HUMAN	35481084	23289440	105896864	7773606	53688696	118138768	0	FALSE
SLGEIPIVESEIK+4.025K+4.025EAGELK+4.025PEEEITVGPVQK+4.025	sp|P53618|COPB_HUMAN	52827960	19815860	103900616	8802625	119215688	208997488	0	FALSE
TVTAMDVVYALK+4.025R+3.988	sp|P62805|H4_HUMAN	2.66098e+06	1.45026e+06	4.68789e+06	794338	4384521	9351688	0	FALSE
YC+57.021IFANFSVTGGK+4.025	sp|Q86VZ2|WDR5B_HUMAN;sp|P61964|WDR5_HUMAN	4.45025e+06	0	35294332	13170934	71135776	22132546	0	FALSE
LDGLVETPTGYIESLPR+3.988	tr|B7Z9C2|B7Z9C2_HUMAN;tr|F8W0J6|F8W0J6_HUMAN;tr|F8VRJ2|F8VRJ2_HUMAN;tr|H0YHC3|H0YHC3_HUMAN;tr|F8W118|F8W118_HUMAN;tr|F8VV59|F8VV59_HUMAN;tr|F8W020|F8W020_HUMAN;tr|H0YIV4|H0YIV4_HUMAN;tr|F5H4R6|F5H4R6_HUMAN;tr|F8VUX1|F8VUX1_HUMAN;tr|F8VY35|F8VY35_HUMAN;tr|F8VXI6|F8VXI6_HUMAN;sp|P55209|NP1L1_HUMAN;sp|P55209-2|NP1L1_HUMAN;sp|P55209-3|NP1L1_HUMAN	46920572	13721997	92343048	9006241	94049984	191018112	0	FALSE
TLPLTGSTFHDQIAMLSHR+3.988	sp|P55265|DSRAD_HUMAN;sp|P55265-4|DSRAD_HUMAN;sp|P55265-5|DSRAD_HUMAN	8.25787e+06	5.31453e+06	19781950	0	24975610	33992116	0	FALSE
MK+4.025EIAEAYLGYPVTNAVITVPAYFNDSQR+3.988	tr|A0A0G2JIW1|A0A0G2JIW1_HUMAN;sp|P0DMV9|HS71B_HUMAN;sp|P0DMV8|HS71A_HUMAN	24584692	22283566	56463304	8985434	70226592	142959440	0	FALSE
AGAIAPC+57.021EVTVPAQNTGLGPEK+4.025TSFFQALGITTK+4.025	tr|G3V210|G3V210_HUMAN;tr|F8VPE8|F8VPE8_HUMAN;tr|F8VWS0|F8VWS0_HUMAN;tr|F8VU65|F8VU65_HUMAN;tr|F8VW21|F8VW21_HUMAN;sp|P05388|RLA0_HUMAN;sp|P05388-2|RLA0_HUMAN;sp|Q8NHW5|RLA0L_HUMAN	4.57245e+06	0	7984997	3.70539e+06	7.19314e+06	12188728	0	FALSE
ISFC+57.021LDIHNMSVK+4.025	sp|O43242|PSMD3_HUMAN;sp|O43242-2|PSMD3_HUMAN	5.14118e+06	10588703	14853112	3.65277e+06	18792802	28419998	0	FALSE
GILADEDSSR+3.988PVWLK+4.025	tr|A0A0U1RQF0|A0A0U1RQF0_HUMAN;sp|P49327|FAS_HUMAN	43337540	37458300	90332584	7.44825e+06	56697692	91591056	0	FALSE
IIDSLFNTVTDK+4.025K+4.025	sp|O60701|UGDH_HUMAN;sp|O60701-2|UGDH_HUMAN;sp|O60701-3|UGDH_HUMAN	29780004	19785296	24654322	19849198	29291696	27240140	0	FALSE
VC+57.021TLAIIDPGDSDIIR+3.988	tr|A0A0B4J213|A0A0B4J213_HUMAN;tr|A0A0C4DH44|A0A0C4DH44_HUMAN;tr|E5RI99|E5RI99_HUMAN;sp|P62888|RL30_HUMAN	667156672	232463808	1367557504	65467580	1131757440	2106412672	0	FALSE
SPYQEFTDHLVK+4.025	tr|E9PQD7|E9PQD7_HUMAN;tr|H0YEN5|H0YEN5_HUMAN;sp|P15880|RS2_HUMAN	449677632	143115248	838275264	163739984	727755584	1388603904	0	FALSE
EC+57.021GNYPGFLTILR+3.988	tr|A0A0C4DG98|A0A0C4DG98_HUMAN;tr|H0Y815|H0Y815_HUMAN;sp|Q8NI27|THOC2_HUMAN	3.29663e+06	5.21186e+06	4.94854e+06	4.31062e+06	3.1531e+06	5713589	0	FALSE
LFIGGLNVQTSESGLR+3.988	sp|Q13151|ROA0_HUMAN	39786100	40983052	127131152	2148387	154730320	247844656	0	FALSE
IVNTPQGC+57.021LWYK+4.025	tr|B1AKJ5|B1AKJ5_HUMAN;tr|F5H7V1|F5H7V1_HUMAN;tr|G3V1R5|G3V1R5_HUMAN;sp|O43847|NRDC_HUMAN;sp|O43847-2|NRDC_HUMAN	8444890	13666090	36878712	6958261	37467784	60132392	0	FALSE
LYSILGTTLK+4.025DEGK+4.025	sp|O75083|WDR1_HUMAN;sp|O75083-3|WDR1_HUMAN	62418472	5.63749e+06	137867984	10922917	91495104	195595968	0	FALSE
LC+57.021AAAASILGK+4.025PADR+3.988	tr|J3KQ18|J3KQ18_HUMAN;tr|B5MC82|B5MC82_HUMAN;sp|P30046|DOPD_HUMAN;sp|P30046-2|DOPD_HUMAN;sp|A6NHG4|DDTL_HUMAN	13426611	2.98178e+06	34108108	2.99216e+06	27744142	36942912	0	FALSE
ADHQPLTEASYVNLPTIALC+57.021NTDSPLR+3.988	tr|A0A0C4DG17|A0A0C4DG17_HUMAN;tr|C9J9K3|C9J9K3_HUMAN;sp|P08865|RSSA_HUMAN	45443124	57852716	136600032	61027796	44461764	78153952	0	FALSE
DISTNYYASQK+4.025K+4.025	tr|H0YIV0|H0YIV0_HUMAN;sp|P14625|ENPL_HUMAN	14885876	15240918	44129060	6.48749e+06	43461184	79076728	0	FALSE
M+15.995QHLNPDPQLIPEQITTDITPEC+57.021LVSPR+3.988	tr|A0A0U1RRM8|A0A0U1RRM8_HUMAN;tr|H0YJ34|H0YJ34_HUMAN;tr|H0YJB6|H0YJB6_HUMAN;sp|Q96AC1|FERM2_HUMAN;sp|Q96AC1-2|FERM2_HUMAN;sp|Q96AC1-3|FERM2_HUMAN	7425852	0	12199774	4.11607e+06	8365706	19315314	0	FALSE
SGLGDDLVQALGLSK+4.025	sp|Q9Y613|FHOD1_HUMAN	2.2354e+06	424758	3145661	1.02306e+06	4.16401e+06	8.34907e+06	0	FALSE
C+57.021K+4.025DDEFTHLYTLIVR+3.988PDNTYEVK+4.025	tr|K7EJB9|K7EJB9_HUMAN;sp|P27797|CALR_HUMAN	4591125	0	7664204	4398137	7512483	27647022	0	FALSE
K+4.025VAEPELMGTPDGTC+57.021YPPPPVPR+3.988	tr|H7BZB3|H7BZB3_HUMAN;tr|F8VPD4|F8VPD4_HUMAN;sp|P27708|PYR1_HUMAN	14919573	2.83567e+06	16969216	2.26707e+06	12055539	19254990	0	FALSE
ADIK+4.025SPSLDVTVPEAELNLETPEISVGGK+4.025	sp|Q09666|AHNK_HUMAN	8640039	9612924	14009926	6.81158e+06	11903283	10998121	0	FALSE
VAPAQPSEEGPGR+3.988K+4.025DENK+4.025VDGMNAPK+4.025	tr|E7EX17|E7EX17_HUMAN;sp|P23588|IF4B_HUMAN;sp|P23588-2|IF4B_HUMAN	8.28316e+06	3.94078e+06	11779650	1.28286e+06	16022775	25623882	0	FALSE
MR+3.988EDYDSVEQDGDEPGPQR+3.988	sp|Q9Y5S9|RBM8A_HUMAN;sp|Q9Y5S9-2|RBM8A_HUMAN	0	0	1.33355e+06	0	1.3857e+06	1.28629e+06	0	FALSE
EMDQTMAANAQK+4.025	tr|Q5T0D2|Q5T0D2_HUMAN;sp|P30085|KCY_HUMAN	12646107	3.31765e+06	19317172	7.12337e+06	21791706	42172720	0	FALSE
TAFDEAIAELDTLNEDSYK+4.025DSTLIM+15.995QLLR+3.988	sp|P27348|1433T_HUMAN	4.15572e+06	2.63277e+06	18179252	744025	8707776	19557578	0	FALSE
QLFVLAGSAEEGVMTPELAGVIK+4.025R+3.988	sp|P08754|GNAI3_HUMAN	11958848	28995796	10370676	1.31762e+06	6.05523e+06	5.40527e+06	0	FALSE
INPYMSSPC+57.021HIEMILTEK+4.025EQIVPK+4.025PEEEVAQK+4.025	tr|J3QQT2|J3QQT2_HUMAN;tr|A0A087WXM6|A0A087WXM6_HUMAN;tr|A0A0A0MRF8|A0A0A0MRF8_HUMAN;tr|A0A0A6YYL6|A0A0A6YYL6_HUMAN;tr|J3QLC8|J3QLC8_HUMAN;tr|J3KRX5|J3KRX5_HUMAN;sp|P18621|RL17_HUMAN;sp|P18621-2|RL17_HUMAN;sp|P18621-3|RL17_HUMAN	94043584	53251524	206568384	40894640	174932128	333751456	0.000106883	FALSE
GVTEAIQNFSFR+3.988	tr|E3W994|E3W994_HUMAN;tr|J3KR49|J3KR49_HUMAN;tr|E7EW49|E7EW49_HUMAN;tr|E7ERI8|E7ERI8_HUMAN;tr|A0A0U1RQI6|A0A0U1RQI6_HUMAN;sp|O75122|CLAP2_HUMAN;sp|O75122-3|CLAP2_HUMAN	7236358	1.40577e+06	11297523	3.31668e+06	10003460	16716556	0	FALSE
GR+3.988ESVLIISTDPAHNISDAFDQK+4.025	tr|A0A087WXS7|A0A087WXS7_HUMAN;tr|K7ERW9|K7ERW9_HUMAN;sp|O43681|ASNA_HUMAN	9178045	6.72405e+06	24017714	4.40809e+06	31118402	34786728	0	FALSE
GLEETVAK+4.025ELQTLHNLR+3.988	sp|P33176|KINH_HUMAN	1.50658e+06	2.17141e+06	4.00611e+06	390624	2.63581e+06	8591257	0	FALSE
LIDWGLAEFYHPAQEYNVR+3.988	tr|H3BSA1|H3BSA1_HUMAN;sp|P19784|CSK22_HUMAN	9609205	3.70627e+06	20754038	1.03923e+06	20330738	45884172	0.000829187	FALSE
ILIANTGMDTDK+4.025IK+4.025	tr|F5GWF6|F5GWF6_HUMAN;tr|F8VQ14|F8VQ14_HUMAN;sp|P78371|TCPB_HUMAN;sp|P78371-2|TCPB_HUMAN	158457056	80764984	347710208	39930236	340746560	705454592	0	FALSE
LQAALDDEEAGGR+3.988PAM+15.995EPGNGSLDLGGDSAGR+3.988	tr|A0A1W2PPS1|A0A1W2PPS1_HUMAN;tr|A0A1X7SBS1|A0A1X7SBS1_HUMAN;sp|Q00839|HNRPU_HUMAN;sp|Q00839-2|HNRPU_HUMAN	35442200	25646524	67460952	7.2813e+06	77258536	176762752	0	FALSE
AYVAVDGIPQGVLER+3.988	tr|E7EQ29|E7EQ29_HUMAN;sp|P16278|BGAL_HUMAN;sp|P16278-2|BGAL_HUMAN;sp|P16278-3|BGAL_HUMAN	13720773	7.08608e+06	36305632	1.41828e+06	37374732	48092948	0	FALSE
TDPVPEEGEDVAATISATETLSEEEQEELR+3.988R+3.988	tr|H0YC42|H0YC42_HUMAN;tr|E5RFR7|E5RFR7_HUMAN;tr|H0YC44|H0YC44_HUMAN;sp|P55327|TPD52_HUMAN;sp|P55327-2|TPD52_HUMAN;sp|P55327-3|TPD52_HUMAN;sp|P55327-4|TPD52_HUMAN;sp|P55327-5|TPD52_HUMAN;sp|P55327-6|TPD52_HUMAN;sp|P55327-7|TPD52_HUMAN;sp|P55327-8|TPD52_HUMAN	671496	0	2813487	0	1.81503e+06	3277076	0	FALSE
TVTAAGAENIQQK+4.025	sp|Q29RF7|PDS5A_HUMAN	6.62829e+06	3.71686e+06	15166432	1.24966e+06	17606498	28395762	0	FALSE
NQLTSNPENTVFDAK+4.025R+3.988	sp|P11021|BIP_HUMAN	64617828	25680666	168409984	19515414	155944720	356653824	0	FALSE
LIK+4.025NNASTDYDLSDK+4.025	tr|G5E9G0|G5E9G0_HUMAN;tr|B5MCW2|B5MCW2_HUMAN;sp|P39023|RL3_HUMAN	13003440	5.26356e+06	16719888	1.00262e+06	10766335	23962400	0	FALSE
SLQADTTNTDTALTTLEEALAEK+4.025ER+3.988	tr|X6RLX0|X6RLX0_HUMAN;tr|X6RM00|X6RM00_HUMAN;tr|G8JLD3|G8JLD3_HUMAN;sp|Q8IUD2|RB6I2_HUMAN;sp|Q8IUD2-2|RB6I2_HUMAN;sp|Q8IUD2-3|RB6I2_HUMAN;sp|Q8IUD2-4|RB6I2_HUMAN;sp|Q8IUD2-5|RB6I2_HUMAN	7178715	5.73784e+06	26055348	2.9629e+06	25862692	49178344	0	FALSE
ADLTEYLSTHYK+4.025	sp|P31930|QCR1_HUMAN	37125164	11674782	84669296	10652325	91503144	143390464	0	FALSE
TPDGQGLSTYK+4.025ELC+57.021SLASDLSQPDLVYK+4.025	tr|J3KN16|J3KN16_HUMAN;sp|Q5VYK3|ECM29_HUMAN	10781864	8823120	39513648	11107289	23531586	35796080	0	FALSE
SGK+4.025TELAEPIAIR+3.988PTSETVM+15.995YPAYAK+4.025	sp|P07814|SYEP_HUMAN	7.12628e+06	7.2737e+06	18574546	0	22438560	30353376	0	FALSE
VC+57.021TLAIIDPGDSDIIR+3.988	tr|A0A0B4J213|A0A0B4J213_HUMAN;tr|A0A0C4DH44|A0A0C4DH44_HUMAN;tr|E5RI99|E5RI99_HUMAN;sp|P62888|RL30_HUMAN	662501120	230371792	1370156032	65003892	1142911104	2097784576	0	FALSE
NNQGTVNWSVDDIVK+4.025	tr|J3QLL0|J3QLL0_HUMAN;tr|J3KS65|J3KS65_HUMAN;sp|P52292|IMA1_HUMAN	9756246	5214551	17732186	2.13982e+06	41813360	88750472	0	FALSE
TIPGK+4.025QQLLIGAYAK+4.025	sp|Q99832|TCPH_HUMAN;sp|Q99832-2|TCPH_HUMAN;sp|Q99832-3|TCPH_HUMAN;sp|Q99832-4|TCPH_HUMAN	46143116	15854478	99906568	11274148	119173480	260252640	0	FALSE
LQDAYYIFQEMADK+4.025	tr|M0QXB4|M0QXB4_HUMAN;sp|O14579|COPE_HUMAN;sp|O14579-2|COPE_HUMAN	7830371	3067544	17968284	2.07696e+06	17847588	35478372	0	FALSE
K+4.025GYEVIYLTEPVDEYC+57.021IQALPEFDGK+4.025R+3.988	sp|P14625|ENPL_HUMAN	85815128	47768884	267365504	29237998	225165760	351192128	0	FALSE
HIGLVYSGMGPDYR+3.988	tr|A0A024RA52|A0A024RA52_HUMAN;sp|P25787|PSA2_HUMAN	7519200	1.73209e+06	23156646	0	26765834	48189192	0	FALSE
IVLVDDR+3.988EC+57.021PVR+3.988	sp|O15067|PUR4_HUMAN	7702941	5.14556e+06	23993632	3.06188e+06	18677048	30723384	0	FALSE
LNEGVVEFASYGDLK+4.025	sp|Q13243|SRSF5_HUMAN;sp|Q13243-3|SRSF5_HUMAN	3.09942e+06	2603710	12690476	2.82712e+06	16973754	27618040	0	FALSE
ALSIPPNIDVLLC+57.021EQEVVADETPAVQAVLR+3.988	tr|H0YGW7|H0YGW7_HUMAN;sp|Q8NE71|ABCF1_HUMAN;sp|Q8NE71-2|ABCF1_HUMAN	14511744	19066666	7.60707e+06	22829470	0	58976544	0	FALSE
ILLAELEQLK+4.025GQGK+4.025	tr|B0YJC4|B0YJC4_HUMAN;tr|A0A1B0GTT5|A0A1B0GTT5_HUMAN;sp|P08670|VIME_HUMAN	649703360	264276448	1365780096	150948368	1311761664	2213231360	0	FALSE
TIYAGNALC+57.021TVK+4.025	tr|H0YL12|H0YL12_HUMAN;tr|H0YKF0|H0YKF0_HUMAN;tr|H0YK49|H0YK49_HUMAN;tr|H0YNX6|H0YNX6_HUMAN;tr|H0YLU7|H0YLU7_HUMAN;sp|P13804|ETFA_HUMAN;sp|P13804-2|ETFA_HUMAN	3.86063e+06	5.4688e+06	10678284	4.1657e+06	7178624	18549538	0	FALSE
GTGASGSFK+4.025LNK+4.025K+4.025	sp|P16403|H12_HUMAN;sp|P10412|H14_HUMAN;sp|P16401|H15_HUMAN;sp|Q02539|H11_HUMAN;sp|P16402|H13_HUMAN	4946327	0	20142218	3558528	12636379	15609142	0	FALSE
SK+4.025GQVK+4.025EEGINK+4.025SEK+4.025	sp|P09874|PARP1_HUMAN	576036	1.39444e+06	3.845e+06	41983.4	4775449	8481494	0	FALSE
GM+15.995YGIENEVFLSLPC+57.021ILNAR+3.988	sp|P07195|LDHB_HUMAN	35139136	36313560	10536290	60607844	4.12567e+06	24086488	0	FALSE
VANPSGNLTETYVQDR+3.988	tr|Q60FE5|Q60FE5_HUMAN;tr|A0A087WWY3|A0A087WWY3_HUMAN;sp|P21333|FLNA_HUMAN;sp|P21333-2|FLNA_HUMAN	22590654	5.91684e+06	41114384	1.05913e+06	38959564	85082184	0	FALSE
MQASIEK+4.025GGSLPK+4.025VEAK+4.025	sp|P06748|NPM_HUMAN;sp|P06748-2|NPM_HUMAN	754942	0	2642619	0	4896366	7.65989e+06	0	FALSE
LYSILGTTLK+4.025DEGK+4.025	sp|O75083|WDR1_HUMAN;sp|O75083-3|WDR1_HUMAN	21678864	5223373	38359004	53596.9	27220158	53601448	0	FALSE
FGEVVDC+57.021TLK+4.025LDPITGR+3.988	tr|H0Y8G5|H0Y8G5_HUMAN;tr|D6RAF8|D6RAF8_HUMAN;tr|D6RBQ9|D6RBQ9_HUMAN;tr|D6RD83|D6RD83_HUMAN;tr|D6RF44|D6RF44_HUMAN;tr|H0YA96|H0YA96_HUMAN;sp|Q14103|HNRPD_HUMAN;sp|Q14103-2|HNRPD_HUMAN;sp|Q14103-3|HNRPD_HUMAN;sp|Q14103-4|HNRPD_HUMAN	5112817	2.46346e+06	19908792	3.39327e+06	22848936	22644866	0	FALSE
IC+57.021ELLPEAAINDVYLAPLLQC+57.021LIEGLSAEPR+3.988	tr|J3QKQ5|J3QKQ5_HUMAN;tr|J3KTM9|J3KTM9_HUMAN;sp|Q14974|IMB1_HUMAN;sp|Q14974-2|IMB1_HUMAN	35241224	0	18122384	10644550	25850528	17334522	0	FALSE
VLK+4.025EVEAVIPDHC+57.021IFASNTSALPISEIAAVSK+4.025R+3.988PEK+4.025	tr|H0YFD6|H0YFD6_HUMAN;tr|A0A2R8Y4F5|A0A2R8Y4F5_HUMAN;sp|P40939|ECHA_HUMAN	32928512	1.47282e+06	12253333	0	12102569	18996672	0.000106883	FALSE
YISPDQLADLYK+4.025	tr|A0A2R8Y6G6|A0A2R8Y6G6_HUMAN;sp|P06733|ENOA_HUMAN;sp|P06733-2|ENOA_HUMAN	21057616	7.32896e+06	23274768	3.78077e+06	11529041	22847064	0	FALSE
K+4.025K+4.025ILATPPQEDAPSVDIANIR+3.988	tr|A0A0B4J1R6|A0A0B4J1R6_HUMAN;tr|E9PFF2|E9PFF2_HUMAN;sp|P29401|TKT_HUMAN;sp|P29401-2|TKT_HUMAN	22709000	7696417	26517758	2.934e+06	31134884	61572100	0	FALSE
LFQEC+57.021C+57.021PHSTDR+3.988	tr|Q5T6W2|Q5T6W2_HUMAN;sp|P61978|HNRPK_HUMAN;sp|P61978-2|HNRPK_HUMAN;sp|P61978-3|HNRPK_HUMAN	36920336	13646145	74348776	227278	77841760	136067552	0	FALSE
STAQQELDGK+4.025PASPTPVIVASHTANK+4.025EEK+4.025	tr|H0YAC7|H0YAC7_HUMAN;sp|P35606|COPB2_HUMAN;sp|P35606-2|COPB2_HUMAN	1.72367e+06	499847	7.29548e+06	204492	1.52347e+06	13560584	0	FALSE
ASEPGLAQLLVDQIYENAMIAAGLVDDPR+3.988	tr|I3L253|I3L253_HUMAN;tr|I3L0K7|I3L0K7_HUMAN;sp|Q12931|TRAP1_HUMAN;sp|Q12931-2|TRAP1_HUMAN	3.88794e+06	1.18017e+06	7.05964e+06	1.40045e+06	6.5968e+06	12183584	0	FALSE
NSNPALNDNLEK+4.025	sp|O00299|CLIC1_HUMAN	87861192	24619868	180584480	41966492	161992880	329649760	0	FALSE
LMTQAQLEEATR+3.988	tr|H7C5F2|H7C5F2_HUMAN;tr|H7C5H3|H7C5H3_HUMAN;tr|G5E9V5|G5E9V5_HUMAN;tr|G5E9W7|G5E9W7_HUMAN;sp|P82650|RT22_HUMAN;sp|P82650-2|RT22_HUMAN	16505884	5684903	30939672	3048880	39544572	68317600	0	FALSE
ADLGVSGPK+4.025VDIDVPDVNLEAPEGK+4.025	sp|Q09666|AHNK_HUMAN	58990396	20526818	105263176	22829148	88117752	164757088	0	FALSE
ILENEK+4.025DLEEAEEYK+4.025EAR+3.988	tr|E5RIW3|E5RIW3_HUMAN;tr|E5RHG6|E5RHG6_HUMAN;tr|E5RJD8|E5RJD8_HUMAN;sp|O75347|TBCA_HUMAN	48724628	21947074	104095688	11795663	96367960	164946896	0	FALSE
LVNLQHLDLLNNK+4.025	sp|Q96AG4|LRC59_HUMAN	92088280	32427248	188884128	26959422	172373296	371551488	0	FALSE
YALQM+15.995EQLNGILLHLESELAQTR+3.988	tr|F8VZY9|F8VZY9_HUMAN;sp|P05783|K1C18_HUMAN	14406677	17748450	33424530	15299809	0	61755576	0	FALSE
ALLELQLEPEELYQTFQR+3.988	sp|P13639|EF2_HUMAN	204416256	62317728	367397600	30925100	314091648	709069056	0	FALSE
PVSSAASVYAGAGGSGSR+3.988	tr|F8VZY9|F8VZY9_HUMAN;sp|P05783|K1C18_HUMAN	0	38042384	196927568	23094304	138407616	307746560	0	FALSE
YPFESAEAQLLNK+4.025	tr|E9PL69|E9PL69_HUMAN;sp|P23921|RIR1_HUMAN	8144470	4350079	24597022	4.4897e+06	30150880	59988148	0	FALSE
TSGNVEDDLIIFPDDC+57.021EFK+4.025R+3.988	sp|Q16186|ADRM1_HUMAN	28962134	13272542	64839820	13146350	71740992	148814288	0	FALSE
DGNASGTTLLEALDC+57.021ILPPTR+3.988PTDK+4.025PLR+3.988LPLQDVYK+4.025	tr|A0A087WV01|A0A087WV01_HUMAN;tr|A0A087WVQ9|A0A087WVQ9_HUMAN;sp|Q5VTE0|EF1A3_HUMAN;sp|P68104|EF1A1_HUMAN;sp|P68104-2|EF1A1_HUMAN	29027706	18093466	84451728	14217840	65905976	112442656	0	FALSE
R+3.988FDEILEASDGIMVAR+3.988	tr|B4DNK4|B4DNK4_HUMAN;tr|H3BR70|H3BR70_HUMAN;tr|H3BTN5|H3BTN5_HUMAN;sp|P14618|KPYM_HUMAN;sp|P14618-2|KPYM_HUMAN;sp|P14618-3|KPYM_HUMAN	11924516	3.17709e+06	17453212	2879015	17957256	36861940	0	FALSE
VAAK+4.025LEVAPISDIIAIK+4.025SPDTFVR+3.988	tr|H0YL12|H0YL12_HUMAN;tr|H0YKF0|H0YKF0_HUMAN;tr|H0YK49|H0YK49_HUMAN;tr|H0YNX6|H0YNX6_HUMAN;tr|H0YLU7|H0YLU7_HUMAN;sp|P13804|ETFA_HUMAN;sp|P13804-2|ETFA_HUMAN	5512872	2.17847e+06	16887872	1320915	15865973	30009354	0	FALSE
NPEVGLK+4.025PVWYSPK+4.025	tr|V9GYZ6|V9GYZ6_HUMAN;sp|P07814|SYEP_HUMAN	1.62255e+06	678379	5225270	1.68683e+06	5598429	11840363	0	FALSE
IQALESNLENLLTR+3.988	tr|A0A3B3IRT3|A0A3B3IRT3_HUMAN;sp|O60343|TBCD4_HUMAN;sp|O60343-2|TBCD4_HUMAN;sp|O60343-3|TBCD4_HUMAN;sp|O60343-4|TBCD4_HUMAN;sp|O60343-5|TBCD4_HUMAN	16614004	3589890	20515970	0	20434808	46546052	0	FALSE
LK+4.025GIEEEEILPGFILC+57.021DPNNLC+57.021HSGR+3.988	tr|H3BR35|H3BR35_HUMAN;sp|P15170|ERF3A_HUMAN;sp|P15170-2|ERF3A_HUMAN;sp|P15170-3|ERF3A_HUMAN	121959544	78632560	324345952	47182164	308238720	512548320	0	FALSE
VR+3.988EEVPLELVEAHVK+4.025	sp|Q92922|SMRC1_HUMAN	5.72638e+06	2.00739e+06	8.09033e+06	2.16437e+06	13653709	30758062	0	FALSE
SFVWHALDYADELPK+4.025PEQLAIR+3.988	sp|P49792|RBP2_HUMAN	7503404	5063079	25786286	1.749e+06	21730300	40388744	0	FALSE
LFIGGLNVQTSESGLR+3.988	sp|Q13151|ROA0_HUMAN	44818212	36329220	122287112	3.44823e+06	154831072	248853152	0	FALSE
VWLDPNETNEIANANSR+3.988	tr|J3QR09|J3QR09_HUMAN;tr|J3KTE4|J3KTE4_HUMAN;sp|P84098|RL19_HUMAN	1.60954e+06	3481537	4816892	5074406	1.68888e+06	16264378	0	FALSE
GIFGFTDSDC+57.021IGK+4.025	tr|H0YJP3|H0YJP3_HUMAN;sp|P23381|SYWC_HUMAN;sp|P23381-2|SYWC_HUMAN	7.61252e+06	2.38955e+06	25272478	3670459	26038264	30613654	0	FALSE
STQFEYAWC+57.021LVR+3.988	sp|Q9Y3D6|FIS1_HUMAN	3.85459e+06	1684470	8944640	0	7436322	18042844	0	FALSE
AHPVFYQGTYSQALNDAK+4.025R+3.988	sp|Q96CS3|FAF2_HUMAN	6.60984e+06	3.17495e+06	32759898	7.25303e+06	33664488	74642264	0	FALSE
VFITDDFHDMM+15.995PK+4.025	sp|P14625|ENPL_HUMAN	14329119	0	16466530	976843	12252807	30919294	0	FALSE
FK+4.025DDVMPATYC+57.021EIDLDK+4.025EK+4.025R+3.988	tr|Q5TB53|Q5TB53_HUMAN;sp|Q9HD45|TM9S3_HUMAN	16350661	12402766	34006452	2.63262e+06	52410000	90816688	0	FALSE
EK+4.025LIAPVAEEEATVPNNK+4.025	tr|A0A3B3IS95|A0A3B3IS95_HUMAN;tr|A8MW50|A8MW50_HUMAN;tr|F5H793|F5H793_HUMAN;tr|C9J7H8|C9J7H8_HUMAN;sp|P07195|LDHB_HUMAN	31402558	10981366	61725568	13532744	68313080	118498696	0	FALSE
VGIIPPK+4.025GC+57.021LLYGPPGTGK+4.025	tr|A0A087X2I1|A0A087X2I1_HUMAN;tr|H0YJC0|H0YJC0_HUMAN;tr|H0YJS8|H0YJS8_HUMAN;sp|P62333|PRS10_HUMAN	16170122	20190062	55736592	19945550	54490468	111875024	0	FALSE
ASEPGLAQLLVDQIYENAMIAAGLVDDPR+3.988	tr|I3L253|I3L253_HUMAN;tr|I3L0K7|I3L0K7_HUMAN;sp|Q12931|TRAP1_HUMAN;sp|Q12931-2|TRAP1_HUMAN	4.24566e+06	1.04855e+06	7241185	1.3716e+06	6.79413e+06	11980583	0	FALSE
TVTNAVVTVPAYFNDSQR+3.988	tr|E9PQQ4|E9PQQ4_HUMAN;tr|E9PI65|E9PI65_HUMAN;tr|E9PLF4|E9PLF4_HUMAN;tr|E9PN89|E9PN89_HUMAN;tr|E9PK54|E9PK54_HUMAN;tr|E9PQK7|E9PQK7_HUMAN;sp|P11142|HSP7C_HUMAN;sp|P11142-2|HSP7C_HUMAN	8494122	3702818	13898566	1.67717e+06	14665400	37472448	0	FALSE
AM+15.995GIM+15.995NSFVNDIFER+3.988	tr|U3KQK0|U3KQK0_HUMAN;sp|Q99877|H2B1N_HUMAN;sp|P23527|H2B1O_HUMAN;sp|P57053|H2BFS_HUMAN;sp|P62807|H2B1C_HUMAN;sp|P58876|H2B1D_HUMAN;sp|Q5QNW6|H2B2F_HUMAN;sp|Q5QNW6-2|H2B2F_HUMAN;sp|P06899|H2B1J_HUMAN;sp|O60814|H2B1K_HUMAN;sp|Q16778|H2B2E_HUMAN;sp|Q93079|H2B1H_HUMAN;sp|Q8N257|H2B3B_HUMAN;sp|P33778|H2B1B_HUMAN;sp|Q99880|H2B1L_HUMAN;sp|Q99879|H2B1M_HUMAN	7.71057e+06	2.09065e+06	14986010	616702	14597648	28018576	0	FALSE
SIQFVDWC+57.021PTGFK+4.025	sp|P68363|TBA1B_HUMAN;sp|P68363-2|TBA1B_HUMAN;sp|P68366|TBA4A_HUMAN;sp|P68366-2|TBA4A_HUMAN	8642829	2.44097e+06	20566272	13813270	46556056	132706056	0	FALSE
FGVPVIADGGIQNVGHIAK+4.025	tr|H0Y4R1|H0Y4R1_HUMAN;sp|P12268|IMDH2_HUMAN	67837024	21275750	133933296	45174920	106100248	203657024	0	FALSE
ADTQTYQPYNK+4.025DWIK+4.025	sp|P84090|ERH_HUMAN	85885912	33997484	197068800	33782036	207924736	398853024	0	FALSE
AMLSTGFK+4.025IPQK+4.025	sp|P31327|CPSM_HUMAN;sp|P31327-2|CPSM_HUMAN;sp|P31327-3|CPSM_HUMAN	41395836	15046628	97348160	11929817	135909920	172319808	0	FALSE
GHR+3.988IEEVPELPLVVEDK+4.025VEGYK+4.025K+4.025	tr|H3BM89|H3BM89_HUMAN;sp|P36578|RL4_HUMAN	57652376	34963232	158424384	13530287	121541552	214437296	0	FALSE
SYSSGGEDGYVR+3.988	sp|Q13347|EIF3I_HUMAN	20720546	5045281	38397336	0	32936740	84794088	0	FALSE
AVIEHNLLSASK+4.025	tr|D6RD63|D6RD63_HUMAN;tr|D6RAX7|D6RAX7_HUMAN;tr|D6RFN0|D6RFN0_HUMAN;sp|Q9BT78|CSN4_HUMAN;sp|Q9BT78-2|CSN4_HUMAN	49746472	1.54959e+06	64221460	6.69961e+06	66446400	139087456	0	FALSE
TVVVNC+57.021NPETVSTDFDEC+57.021DK+4.025LYFEELSLER+3.988	sp|P31327|CPSM_HUMAN;sp|P31327-2|CPSM_HUMAN;sp|P31327-3|CPSM_HUMAN	9610150	3.3236e+06	33782656	4473327	38808968	49890952	0	FALSE
EAYPGDVFYLHSR+3.988	sp|P25705|ATPA_HUMAN;sp|P25705-2|ATPA_HUMAN;sp|P25705-3|ATPA_HUMAN	41152608	12365316	85340280	3.14569e+06	87132632	160189120	0	FALSE
IAQLEEQLDNETK+4.025ER+3.988	sp|P35579|MYH9_HUMAN;sp|P35579-2|MYH9_HUMAN	16582671	5.51263e+06	35522220	12134058	37560384	82574080	0	FALSE
TLLSDPTYR+3.988ELIEQLR+3.988	tr|F5H783|F5H783_HUMAN;sp|P31948|STIP1_HUMAN;sp|P31948-2|STIP1_HUMAN;sp|P31948-3|STIP1_HUMAN	36033888	7.89178e+06	8708160	8504265	13271441	25006368	0.000829187	FALSE
GLSEDTTEETLK+4.025ESFDGSVR+3.988	tr|H7BY16|H7BY16_HUMAN;sp|P19338|NUCL_HUMAN	796390	177846	1.74775e+06	615960	402660	149669	0.000106883	FALSE
ELAVQIYEEAR+3.988K+4.025	tr|A0A2R8Y5G6|A0A2R8Y5G6_HUMAN;tr|A0A0D9SG12|A0A0D9SG12_HUMAN;tr|A0A2R8YFR4|A0A2R8YFR4_HUMAN;tr|A0A2R8YDH3|A0A2R8YDH3_HUMAN;tr|A0A2R8YF78|A0A2R8YF78_HUMAN;tr|A0A0D9SFB3|A0A0D9SFB3_HUMAN;tr|A0A2R8YCW1|A0A2R8YCW1_HUMAN;tr|A0A0D9SF53|A0A0D9SF53_HUMAN;tr|A0A2R8Y7T2|A0A2R8Y7T2_HUMAN;tr|A0A2R8YDT5|A0A2R8YDT5_HUMAN;tr|A0A2U3TZJ9|A0A2U3TZJ9_HUMAN;tr|A0A2R8Y4A4|A0A2R8Y4A4_HUMAN;tr|A0A2R8Y645|A0A2R8Y645_HU…	4.92737e+06	1.84936e+06	11325310	1237141	13388247	31745076	0	FALSE
IEYDTFGELK+4.025VPNDK+4.025YYGAQTVR+3.988	sp|P07954|FUMH_HUMAN;sp|P07954-2|FUMH_HUMAN	78016816	32290240	176566352	19572378	188281936	281868128	0	FALSE
AK+4.025VDEFPLC+57.021GHMVSDEYEQLSSEALEAAR+3.988	tr|B8A6G2|B8A6G2_HUMAN;tr|X1WI28|X1WI28_HUMAN;tr|A6QRI9|A6QRI9_HUMAN;sp|P27635|RL10_HUMAN	4234102	4.61539e+06	15030425	4426258	10168820	12369795	0.000829187	FALSE
GFC+57.021FITFK+4.025EEEPVK+4.025	tr|H0Y8G5|H0Y8G5_HUMAN;tr|H0YA96|H0YA96_HUMAN;sp|Q14103|HNRPD_HUMAN;sp|Q14103-2|HNRPD_HUMAN;sp|Q14103-3|HNRPD_HUMAN;sp|Q14103-4|HNRPD_HUMAN	7430978	1.6628e+06	8813618	249533	9543535	14045567	0	FALSE
ALELSGTAVPPDLEK+4.025LWSDFK+4.025DQQK+4.025	tr|A0A0C4DG89|A0A0C4DG89_HUMAN;sp|Q7L014|DDX46_HUMAN	12789218	16680963	29420722	5619953	28222588	43294500	0.000829187	FALSE
LFVGNLPADITEDEFK+4.025R+3.988	sp|P23246|SFPQ_HUMAN;sp|P23246-2|SFPQ_HUMAN	166291152	86157840	388793056	45109784	456440384	1002739968	0	FALSE
IM+15.995LFTNEDNPHGNDSAK+4.025	tr|B1AHC9|B1AHC9_HUMAN;sp|P12956|XRCC6_HUMAN;sp|P12956-2|XRCC6_HUMAN	10043100	1615556	27501558	5.32096e+06	26441236	57368516	0.000106883	FALSE
IDFSK+4.025LTSLNVK+4.025	tr|K7EK45|K7EK45_HUMAN;tr|A0A0U1RRM4|A0A0U1RRM4_HUMAN;tr|A0A087WU68|A0A087WU68_HUMAN;tr|A6NLN1|A6NLN1_HUMAN;sp|P26599|PTBP1_HUMAN;sp|P26599-2|PTBP1_HUMAN;sp|P26599-3|PTBP1_HUMAN;sp|O95758|PTBP3_HUMAN;sp|O95758-1|PTBP3_HUMAN;sp|O95758-2|PTBP3_HUMAN;sp|O95758-4|PTBP3_HUMAN;sp|O95758-5|PTBP3_HUMAN;sp|O95758-6|PTBP3_HUMAN;sp|O95758-7|PTBP3_HUMAN	10645408	3.30979e+06	10437954	1.19836e+06	6979011	16064577	0	FALSE
TLQALQIPAAK+4.025LEGVLAEVAQHYQDTLIR+3.988	tr|A0A0J9YXZ5|A0A0J9YXZ5_HUMAN;sp|P46940|IQGA1_HUMAN	1.40121e+06	772461	6.96404e+06	2.07504e+06	5318365	10646518	0	FALSE
GK+4.025DIGK+4.025PIEK+4.025GPR+3.988	sp|O60869|EDF1_HUMAN	239055	399220	5876334	0	5014807	8658772	0	FALSE
LTVSSLQESGLK+4.025	tr|Q60FE5|Q60FE5_HUMAN;tr|A0A087WWY3|A0A087WWY3_HUMAN;sp|P21333|FLNA_HUMAN;sp|P21333-2|FLNA_HUMAN	16799832	8366917	31014622	2.95097e+06	26034068	55198992	0	FALSE
GYLADPAK+4.025FPEAR+3.988	tr|E5RIZ4|E5RIZ4_HUMAN;sp|Q9P015|RM15_HUMAN	41820928	3.79676e+06	18709862	346826	21817002	45674876	0	FALSE
SGPFGQIFR+3.988PDNFVFGQSGAGNNWAK+4.025	tr|Q5ST81|Q5ST81_HUMAN;tr|Q5JP53|Q5JP53_HUMAN;tr|M0R1I1|M0R1I1_HUMAN;tr|M0QZL7|M0QZL7_HUMAN;tr|M0R278|M0R278_HUMAN;tr|M0QY85|M0QY85_HUMAN;sp|P04350|TBB4A_HUMAN;sp|P07437|TBB5_HUMAN;sp|Q13885|TBB2A_HUMAN;sp|P68371|TBB4B_HUMAN;sp|Q9BVA1|TBB2B_HUMAN	20002888	19727136	55538520	17509222	60098844	125926496	0	FALSE
GVVDSEDIPLNLSR+3.988	tr|I3L239|I3L239_HUMAN;tr|I3L0K7|I3L0K7_HUMAN;sp|Q12931|TRAP1_HUMAN;sp|Q12931-2|TRAP1_HUMAN	17010138	56828692	38432472	49086944	77650088	75565216	0	FALSE
GVVDSEDLPLNISR+3.988	sp|P07900|HS90A_HUMAN;sp|P07900-2|HS90A_HUMAN;sp|P08238|HS90B_HUMAN	17010138	56828692	38432472	49086944	77650088	75565216	0	FALSE
MVVNEGSDGGQSVYHVHLHVLGGR+3.988	sp|P49773|HINT1_HUMAN	16633573	9071706	96108256	0	43096576	66497680	0	FALSE
DLEFTIYDDDDVSPFLEGLEER+3.988PQR+3.988K+4.025	tr|F5GX11|F5GX11_HUMAN;sp|P25786|PSA1_HUMAN;sp|P25786-2|PSA1_HUMAN	37211832	24201270	71855552	8953663	64030924	144318240	0	FALSE
EVGVYEALK+4.025DDSWLK+4.025	tr|B9A041|B9A041_HUMAN;tr|B8ZZ51|B8ZZ51_HUMAN;sp|P40925|MDHC_HUMAN;sp|P40925-2|MDHC_HUMAN;sp|P40925-3|MDHC_HUMAN	15642259	8.22329e+06	35447248	4713001	30018202	52167556	0	FALSE
YFILPDSLPLDTLLVDVEPK+4.025	tr|J3QLI9|J3QLI9_HUMAN;sp|P62314|SMD1_HUMAN	1.20633e+06	88603.5	1.19979e+06	487646	1.17686e+06	2.73538e+06	0	FALSE
DVYEDELVPVFEAVGR+3.988	tr|D6RBS9|D6RBS9_HUMAN;tr|D6RA49|D6RA49_HUMAN;tr|D6RFL5|D6RFL5_HUMAN;tr|D6R9D6|D6R9D6_HUMAN;tr|D6REZ6|D6REZ6_HUMAN;tr|D6R9M7|D6R9M7_HUMAN;tr|D6RBP6|D6RBP6_HUMAN;tr|B7Z8Z7|B7Z8Z7_HUMAN;sp|A0AV96|RBM47_HUMAN;sp|A0AV96-2|RBM47_HUMAN	3.41746e+06	890575	7286673	1.54702e+06	6.50406e+06	13241520	0	FALSE
ILDK+4.025C+57.021NEIINWLDK+4.025	tr|A8K7Q2|A8K7Q2_HUMAN;tr|E9PKE3|E9PKE3_HUMAN;tr|E9PNE6|E9PNE6_HUMAN;tr|E9PM13|E9PM13_HUMAN;tr|E9PS65|E9PS65_HUMAN;sp|P11142|HSP7C_HUMAN	37077828	22329944	33924744	13258413	23644158	60676080	0	FALSE
YNFPNPNPFVEDDMDK+4.025NEIASVAYR+3.988	sp|O15371|EIF3D_HUMAN;sp|O15371-2|EIF3D_HUMAN;sp|O15371-3|EIF3D_HUMAN	0	0	2.31186e+06	323758	4.6442e+06	6032522	0.000106883	FALSE
VIHDNFGIVEGLM+15.995TTVHAITATQK+4.025	tr|E7EUT5|E7EUT5_HUMAN;sp|P04406|G3P_HUMAN;sp|P04406-2|G3P_HUMAN	10557045	483055	17745838	3171097	10977027	25145178	0	FALSE
VAQEK+4.025DQLQEQLQALK+4.025ESLK+4.025	tr|F5H4J1|F5H4J1_HUMAN;tr|A0A087WY61|A0A087WY61_HUMAN;sp|Q14980|NUMA1_HUMAN;sp|Q14980-2|NUMA1_HUMAN;sp|Q14980-3|NUMA1_HUMAN;sp|Q14980-4|NUMA1_HUMAN	8450730	2.9243e+06	16821222	3.83849e+06	26095410	44411948	0	FALSE
YGK+4.025DATNVGDEGGFAPNILENK+4.025EGLELLK+4.025	tr|A0A2R8Y6G6|A0A2R8Y6G6_HUMAN;sp|P06733|ENOA_HUMAN;sp|P06733-2|ENOA_HUMAN	2.15489e+06	3.1754e+06	4.26986e+06	2.98911e+06	4990205	2.83623e+06	0	FALSE
R+3.988YVEPPEMIGPM+15.995R+3.988PEQFSDEVEPATPEEGEPATQR+3.988	sp|Q4V321|GAG13_HUMAN;sp|Q6NT46|GAG2A_HUMAN;sp|Q13066|GAG2B_HUMAN;sp|Q9UEU5|GGE2D_HUMAN	8334485	6.9824e+06	24218672	12920810	24183692	38503436	0	FALSE
SGSLENVPNVGVNK+4.025	sp|P53004|BIEA_HUMAN	37034252	18209962	68575480	18343734	65726000	116594944	0	FALSE
GQNQPVLNITNK+4.025	tr|Q5R211|Q5R211_HUMAN;sp|P31327|CPSM_HUMAN;sp|P31327-3|CPSM_HUMAN	15916703	7086604	30038124	13411794	35615156	50830248	0	FALSE
APNTPDILEIEFK+4.025K+4.025	sp|P00966|ASSY_HUMAN	9404957	3.54385e+06	21467362	3.14942e+06	18536226	28088836	0	FALSE
EMNPALGIDC+57.021LHK+4.025	tr|E9PCA1|E9PCA1_HUMAN;tr|E7ENZ3|E7ENZ3_HUMAN;tr|B7ZAR1|B7ZAR1_HUMAN;sp|P48643|TCPE_HUMAN;sp|P48643-2|TCPE_HUMAN	59525992	19872182	142940256	24257754	142315616	288975264	0	FALSE
AITR+3.988NPLVAVYYTNR+3.988	sp|Q9UNE7|CHIP_HUMAN	94976696	12820866	51020504	17961810	34364192	58043132	0	FALSE
LFEYGGFPPESNYLFLGDYVDR+3.988	tr|F8W0W8|F8W0W8_HUMAN;tr|F8W0V8|F8W0V8_HUMAN;tr|A0A087WYY5|A0A087WYY5_HUMAN;tr|F8VR82|F8VR82_HUMAN;tr|F8VYE8|F8VYE8_HUMAN;tr|E9PMD7|E9PMD7_HUMAN;sp|P62136|PP1A_HUMAN;sp|P62136-2|PP1A_HUMAN;sp|P62136-3|PP1A_HUMAN;sp|P36873|PP1G_HUMAN;sp|P36873-2|PP1G_HUMAN	6548816	2385780	7.80103e+06	12995070	1.22099e+06	21413730	0	FALSE
GSQFGQSC+57.021C+57.021LR+3.988	tr|V9GYZ6|V9GYZ6_HUMAN;sp|P07814|SYEP_HUMAN	40451012	11994710	59727108	3676521	70064984	96963872	0	FALSE
R+3.988IDMVPELLSSNLC+57.021SLK+4.025	tr|G3V1J5|G3V1J5_HUMAN;tr|F2Z2C0|F2Z2C0_HUMAN;sp|Q9Y2L1|RRP44_HUMAN;sp|Q9Y2L1-2|RRP44_HUMAN	3416402	2.7584e+06	10052414	9117323	9318804	21924870	0.000829187	FALSE
FSTWTNTEFR+3.988	sp|P07099|HYEP_HUMAN	16764574	3.36895e+06	29711680	90260840	65901756	232333360	0	FALSE
LPVPAVK+4.025DTVNR+3.988	sp|P50416|CPT1A_HUMAN;sp|P50416-2|CPT1A_HUMAN	17559580	3.3485e+06	26024826	1.11023e+06	44947172	98853904	0	FALSE
TGHSLLHTLYGR+3.988	tr|D6RFM5|D6RFM5_HUMAN;sp|P31040|SDHA_HUMAN;sp|P31040-2|SDHA_HUMAN	58760312	19644088	89887048	623529	85367280	142441072	0	FALSE
MIAAVDTDSPR+3.988	tr|I6LPK7|I6LPK7_HUMAN;tr|K4JQN1|K4JQN1_HUMAN;sp|Q07812|BAX_HUMAN;sp|Q07812-2|BAX_HUMAN;sp|Q07812-5|BAX_HUMAN;sp|Q07812-6|BAX_HUMAN;sp|Q07812-7|BAX_HUMAN;sp|Q07812-8|BAX_HUMAN	6870443	8603418	15476165	33353210	20991662	56383424	0	FALSE
TFTDHVMLFTQTK+4.025	tr|B7Z6D5|B7Z6D5_HUMAN;sp|Q96GQ7|DDX27_HUMAN	1.48585e+06	375050	5.4464e+06	296211	6922452	12335547	0	FALSE
WVTYFNK+4.025PDIDAWELR+3.988K+4.025	tr|H3BNX8|H3BNX8_HUMAN;tr|H3BRI0|H3BRI0_HUMAN;sp|P20674|COX5A_HUMAN	23173712	9853882	52122160	5223859	57249932	96959160	0	FALSE
SINSILDYISTSK+4.025	tr|B4DIH5|B4DIH5_HUMAN;tr|H0YM03|H0YM03_HUMAN;tr|H0YKU5|H0YKU5_HUMAN;sp|P61201|CSN2_HUMAN;sp|P61201-2|CSN2_HUMAN	3697852	1.10254e+06	7.19836e+06	484111	7.3133e+06	15237817	0	FALSE
GIEILTDMSR+3.988PVELSDR+3.988ETLLNSATTSLNSK+4.025	sp|P50991|TCPD_HUMAN;sp|P50991-2|TCPD_HUMAN	8.20277e+06	7.91311e+06	13033144	3.14613e+06	44353036	49426744	0	FALSE
TNEK+4.025VELQELNDR+3.988FANYIDK+4.025VR+3.988	tr|B0YJC4|B0YJC4_HUMAN;tr|A0A1B0GTT5|A0A1B0GTT5_HUMAN;sp|P08670|VIME_HUMAN	38768372	17072114	88584000	10315461	105993120	159308464	0	FALSE
ISK+4.025EVLAGR+3.988PLFPHVLC+57.021HNC+57.021AVEFNFGQK+4.025	tr|A0A1W2PQL0|A0A1W2PQL0_HUMAN;tr|A0A1W2PP34|A0A1W2PP34_HUMAN;tr|Q5RI18|Q5RI18_HUMAN;tr|A0A1W2PQ74|A0A1W2PQ74_HUMAN;tr|A0A1W2PPH7|A0A1W2PPH7_HUMAN;tr|A0A1W2PP35|A0A1W2PP35_HUMAN;tr|A0A1W2PPL4|A0A1W2PPL4_HUMAN;tr|A0A1W2PPS1|A0A1W2PPS1_HUMAN;tr|A0A1X7SBS1|A0A1X7SBS1_HUMAN;tr|A0A1W2PRZ7|A0A1W2PRZ7_HUMAN;sp|Q00839|HNRPU_HUMAN;sp|Q00839-2|HNRPU_HUMAN	975596	0	2.24979e+06	0	1.62432e+06	3.13091e+06	0	FALSE
VIPEDGPAAQNPENVK+4.025R+3.988	tr|E9PDF2|E9PDF2_HUMAN;tr|A0A0D9SFS3|A0A0D9SFS3_HUMAN;tr|E9PCR7|E9PCR7_HUMAN;tr|E9PFG7|E9PFG7_HUMAN;sp|Q02218|ODO1_HUMAN;sp|Q02218-2|ODO1_HUMAN	23195748	9482193	46047624	4.10735e+06	48366404	82463104	0	FALSE
TEMENEFVLIK+4.025K+4.025	tr|F8VP67|F8VP67_HUMAN;tr|F8VUG2|F8VUG2_HUMAN;tr|F8W1U3|F8W1U3_HUMAN;sp|P05787|K2C8_HUMAN;sp|P05787-2|K2C8_HUMAN	129934008	54423680	307653984	22793748	196324016	467903776	0	FALSE
TMLEDLGMDDEGDDDPVPLPNVNAAILK+4.025K+4.025	tr|F8W8N3|F8W8N3_HUMAN;tr|E5RJR5|E5RJR5_HUMAN;tr|E5RI56|E5RI56_HUMAN;tr|E7ERH2|E7ERH2_HUMAN;tr|E5RGM3|E5RGM3_HUMAN;sp|P63208|SKP1_HUMAN;sp|P63208-2|SKP1_HUMAN	0	0	2.56772e+06	1.22297e+06	2.63612e+06	6.00484e+06	0	FALSE
IPSAVGYQPTLATDM+15.995GTMQER+3.988	tr|F8W0P7|F8W0P7_HUMAN;tr|F8W079|F8W079_HUMAN;tr|H0YH81|H0YH81_HUMAN;tr|H0YI37|H0YI37_HUMAN;sp|P06576|ATPB_HUMAN	82068680	0	267250320	254197840	0	188432688	0	FALSE
TFDLEAMFEQTR+3.988	tr|D6RIW8|D6RIW8_HUMAN;sp|Q9NW82|WDR70_HUMAN	205736	151800	765728	182472	679711	1.55175e+06	0	FALSE
FLPR+3.988EEGPYEVEVTYDGVPVPGSPFPLEAVAPTK+4.025PSK+4.025	tr|Q60FE5|Q60FE5_HUMAN;tr|A0A087WWY3|A0A087WWY3_HUMAN;sp|P21333|FLNA_HUMAN;sp|P21333-2|FLNA_HUMAN	135402512	63959096	230621520	39501408	233086688	474891808	0	FALSE
SYPGSQLDILIDQGK+4.025DDQFLLDGQLLPDNFIAAC+57.021TEK+4.025	tr|H7BZT7|H7BZT7_HUMAN;tr|U3KQT1|U3KQT1_HUMAN;tr|X6RA14|X6RA14_HUMAN;sp|P10768|ESTD_HUMAN	4.88854e+06	3.77801e+06	13014029	9248160	12202479	39186876	0	FALSE
TEMENEFVLIK+4.025K+4.025	tr|F8VP67|F8VP67_HUMAN;tr|F8VUG2|F8VUG2_HUMAN;tr|F8W1U3|F8W1U3_HUMAN;sp|P05787|K2C8_HUMAN;sp|P05787-2|K2C8_HUMAN	34294164	16762487	87743400	8271858	60027660	144168384	0	FALSE
TTLLHMLK+4.025DDR+3.988	tr|D6RD69|D6RD69_HUMAN;tr|X1WI22|X1WI22_HUMAN;tr|D6RDB2|D6RDB2_HUMAN;tr|D6RAA2|D6RAA2_HUMAN;tr|Q5SQT8|Q5SQT8_HUMAN;sp|Q9NR31|SAR1A_HUMAN;sp|Q9Y6B6|SAR1B_HUMAN	19794798	3418770	50640844	5285247	60021476	104361192	0	FALSE
YVLINWVGEDVPDAR+3.988	tr|D6R9W4|D6R9W4_HUMAN;tr|D6RCR4|D6RCR4_HUMAN;tr|D6RFI1|D6RFI1_HUMAN;sp|Q16643|DREB_HUMAN;sp|Q16643-2|DREB_HUMAN;sp|Q16643-3|DREB_HUMAN	8350064	2.82581e+06	17994544	0	74165104	31136278	0	FALSE
AMLSTGFK+4.025IPQK+4.025	sp|P31327|CPSM_HUMAN;sp|P31327-2|CPSM_HUMAN;sp|P31327-3|CPSM_HUMAN	40618932	17133744	93853472	11427555	132534768	171822400	0	FALSE
IEFEGQPVDFVDPNK+4.025QNLIAEVSTK+4.025	tr|Q5R211|Q5R211_HUMAN;sp|P31327|CPSM_HUMAN;sp|P31327-3|CPSM_HUMAN	2.5603e+06	1.84664e+06	3.35435e+06	0	4286189	3.03175e+06	0	FALSE
GGAAVDPDSGLEHSAHVLEK+4.025	sp|P09874|PARP1_HUMAN	9082903	0	69033960	8458550	66649256	137006192	0	FALSE
K+4.025GYEVIYLTEPVDEYC+57.021IQALPEFDGK+4.025R+3.988	sp|P14625|ENPL_HUMAN	86542024	48084204	251869824	28994294	225124704	352796960	0	FALSE
LPDGTSLTQTFR+3.988	tr|E9PJ81|E9PJ81_HUMAN;tr|E9PRQ7|E9PRQ7_HUMAN;tr|A0A087WTZ5|A0A087WTZ5_HUMAN;sp|Q04323|UBXN1_HUMAN;sp|Q04323-2|UBXN1_HUMAN	43785260	14903964	75877920	8079300	64241416	119353200	0	FALSE
LQEEMLQR+3.988EEAENTLQSFR+3.988	tr|B0YJC4|B0YJC4_HUMAN;tr|B0YJC5|B0YJC5_HUMAN;sp|P08670|VIME_HUMAN	2.38655e+06	2.50599e+06	3.00677e+06	37446	5.89844e+06	8449644	0	FALSE
DQELYFFHELSPGSC+57.021FFLPK+4.025	sp|P26639|SYTC_HUMAN;sp|P26639-2|SYTC_HUMAN	59385916	38815200	20349278	18906952	21689836	39773804	0.00025997	FALSE
MNPGDLQWMTAGR+3.988	sp|O00625|PIR_HUMAN	3.98366e+06	130273	11003997	0	13192528	28968278	0	FALSE
LAAAILGGVDQIHIK+4.025PGAK+4.025	tr|M0R1H0|M0R1H0_HUMAN;tr|M0R2Q4|M0R2Q4_HUMAN;tr|M0R0P1|M0R0P1_HUMAN;tr|M0QXL5|M0QXL5_HUMAN;tr|M0R2U2|M0R2U2_HUMAN;tr|M0R299|M0R299_HUMAN;tr|M0R2B0|M0R2B0_HUMAN;sp|P22087|FBRL_HUMAN	18506452	9191388	24886966	4.0154e+06	25868126	49303380	0	FALSE
VHVGDEDFVHLR+3.988	sp|P04080|CYTB_HUMAN	13039186	3.02401e+06	22345164	1.36256e+06	21825400	52803456	0	FALSE
TLNDELEIIEGMK+4.025FDR+3.988	tr|E7EXB4|E7EXB4_HUMAN;tr|E7ESH4|E7ESH4_HUMAN;sp|P10809|CH60_HUMAN	1062854	3085416	7126212	5082661	6941083	8.24372e+06	0	FALSE
MIYASSK+4.025DAIK+4.025	tr|G3V1A4|G3V1A4_HUMAN;tr|E9PQB7|E9PQB7_HUMAN;tr|E9PP50|E9PP50_HUMAN;tr|F6RFD5|F6RFD5_HUMAN;tr|E9PK25|E9PK25_HUMAN;sp|P60981|DEST_HUMAN;sp|P60981-2|DEST_HUMAN;sp|P23528|COF1_HUMAN;sp|Q9Y281|COF2_HUMAN;sp|Q9Y281-3|COF2_HUMAN	15167299	6.20903e+06	42596344	3.14232e+06	35656120	61766220	0	FALSE
EQIVPK+4.025PEEEVAQK+4.025	tr|J3QQT2|J3QQT2_HUMAN;tr|A0A087WXM6|A0A087WXM6_HUMAN;tr|A0A0A0MRF8|A0A0A0MRF8_HUMAN;tr|A0A0A6YYL6|A0A0A6YYL6_HUMAN;tr|J3QLC8|J3QLC8_HUMAN;tr|J3KRX5|J3KRX5_HUMAN;sp|P18621|RL17_HUMAN;sp|P18621-2|RL17_HUMAN;sp|P18621-3|RL17_HUMAN	19538776	6133669	41645116	5509697	37589164	64074376	0	FALSE
TATPQQAQEVHEK+4.025LR+3.988	tr|U3KPZ0|U3KPZ0_HUMAN;sp|P60174|TPIS_HUMAN;sp|P60174-1|TPIS_HUMAN;sp|P60174-4|TPIS_HUMAN	1.56156e+06	284978	9768971	0	12869489	21702868	0	FALSE
DQEGQDVLLFIDNIFR+3.988	tr|F8W0P7|F8W0P7_HUMAN;tr|H0YH81|H0YH81_HUMAN;sp|P06576|ATPB_HUMAN	5.68044e+06	1.9266e+06	11406121	659077	10762346	20800396	0	FALSE
GFGFVTFSSMAEVDAAMAAR+3.988PHSIDGR+3.988	tr|A0A087WUI2|A0A087WUI2_HUMAN;sp|P22626|ROA2_HUMAN;sp|P22626-2|ROA2_HUMAN	4.60936e+06	1.29123e+06	7.89298e+06	5.54297e+06	14017472	17185708	0.000106883	FALSE
TVTNAVVTVPAYFNDSQR+3.988	tr|E9PQQ4|E9PQQ4_HUMAN;tr|E9PI65|E9PI65_HUMAN;tr|E9PLF4|E9PLF4_HUMAN;tr|E9PN89|E9PN89_HUMAN;tr|E9PK54|E9PK54_HUMAN;tr|E9PQK7|E9PQK7_HUMAN;sp|P11142|HSP7C_HUMAN;sp|P11142-2|HSP7C_HUMAN	7.88775e+06	3.5403e+06	14799030	2.11297e+06	12112531	36102540	0	FALSE
LGLSTLGELK+4.025QNLSR+3.988	tr|A0A087WZ51|A0A087WZ51_HUMAN;tr|A0A087WYR3|A0A087WYR3_HUMAN;sp|O43399|TPD54_HUMAN;sp|O43399-2|TPD54_HUMAN;sp|O43399-3|TPD54_HUMAN;sp|O43399-4|TPD54_HUMAN;sp|O43399-5|TPD54_HUMAN;sp|O43399-6|TPD54_HUMAN;sp|O43399-7|TPD54_HUMAN	37646732	21779338	109683176	6281998	98274480	193200896	0	FALSE
VANVSAAEDSVSQR+3.988	tr|G3V0G3|G3V0G3_HUMAN;tr|H7C3E9|H7C3E9_HUMAN;tr|F8WDT8|F8WDT8_HUMAN;sp|Q9NY93|DDX56_HUMAN;sp|Q9NY93-2|DDX56_HUMAN	19874646	8.29192e+06	38428492	1.41027e+06	36074524	78446152	0	FALSE
WLPAGDALLQM+15.995ITIHLPSPVTAQK+4.025	sp|P13639|EF2_HUMAN	24079816	6442303	38619116	16483848	28140882	95120136	0	FALSE
AVLSAEQLR+3.988DEEVHAGLGELLR+3.988	tr|E9PJH8|E9PJH8_HUMAN;tr|E9PNX1|E9PNX1_HUMAN;tr|E9PK86|E9PK86_HUMAN;tr|E9PRS3|E9PRS3_HUMAN;tr|E9PIG2|E9PIG2_HUMAN;tr|E9PQ34|E9PQ34_HUMAN;tr|E9PMI5|E9PMI5_HUMAN;tr|E9PR70|E9PR70_HUMAN;tr|E9PPV6|E9PPV6_HUMAN;sp|P50454|SERPH_HUMAN	81435784	39594244	181105568	15680455	192121472	350352224	0	FALSE
VFEVSLADLQNDEVAFR+3.988	tr|D6RAT0|D6RAT0_HUMAN;tr|D6RG13|D6RG13_HUMAN;tr|H0Y8L7|H0Y8L7_HUMAN;tr|D6RB09|D6RB09_HUMAN;tr|D6RI02|D6RI02_HUMAN;tr|D6RED7|D6RED7_HUMAN;tr|D6RAS7|D6RAS7_HUMAN;tr|D6RGE0|D6RGE0_HUMAN;tr|E9PFI5|E9PFI5_HUMAN;sp|P61247|RS3A_HUMAN	4244596	4621594	9434803	8056640	4800346	11397906	0.000829187	FALSE
AGYPQYVSEILEK+4.025	tr|C9JCA9|C9JCA9_HUMAN;tr|B8ZZ38|B8ZZ38_HUMAN;tr|A0A0C4DG06|A0A0C4DG06_HUMAN;sp|P42704|LPPRC_HUMAN	45382272	33315390	95591024	24885086	117229656	165591824	0	FALSE
LDQPM+15.995TEIVSR+3.988	tr|Q5JRR6|Q5JRR6_HUMAN;sp|P22314|UBA1_HUMAN;sp|P22314-2|UBA1_HUMAN	9162853	1.71923e+06	19009694	0	17988290	37056852	0	FALSE
LR+3.988EVVETPLLHPER+3.988	tr|A0A1W2PQS1|A0A1W2PQS1_HUMAN;sp|P35998|PRS7_HUMAN;sp|P35998-2|PRS7_HUMAN	0	851033	1.10068e+06	0	2.50562e+06	5943481	0	FALSE
YGEPGEVFINK+4.025	sp|P23246|SFPQ_HUMAN;sp|P23246-2|SFPQ_HUMAN	117593568	49804536	284215360	55629912	367828736	769424128	0	FALSE
MK+4.025EIAEAYLGK+4.025	tr|E9PKE3|E9PKE3_HUMAN;tr|E9PQQ4|E9PQQ4_HUMAN;tr|E9PI65|E9PI65_HUMAN;tr|E9PLF4|E9PLF4_HUMAN;tr|E9PN89|E9PN89_HUMAN;tr|E9PPY6|E9PPY6_HUMAN;tr|E9PK54|E9PK54_HUMAN;tr|E9PQK7|E9PQK7_HUMAN;sp|P11142|HSP7C_HUMAN;sp|P11142-2|HSP7C_HUMAN	86677240	41524032	219071184	23512242	236013232	565359936	0	FALSE
AVLIAGQPGTGK+4.025	tr|M0R0Y3|M0R0Y3_HUMAN;tr|X6R2L4|X6R2L4_HUMAN;tr|M0QXI6|M0QXI6_HUMAN;sp|Q9Y230|RUVB2_HUMAN;sp|Q9Y230-2|RUVB2_HUMAN	93647328	29032730	210779232	30106692	212521392	381862848	0	FALSE
GIFGSSAVPQPK+4.025	tr|R4GMQ1|R4GMQ1_HUMAN;tr|R4GMP9|R4GMP9_HUMAN;sp|O60341|KDM1A_HUMAN;sp|O60341-2|KDM1A_HUMAN	11345525	2.08609e+06	18956442	2189356	21381820	49257496	0	FALSE
TAFDEAIAELDTLNEDSYK+11.051DSTLIM+15.995QLLR+11.032	sp|P27348|1433T_HUMAN	4695416	2325018	13931008	4005403	14088468	23570526	0	FALSE
MLGEALSK+4.025NPGYIK+4.025	tr|J3KPX7|J3KPX7_HUMAN;tr|F5GY37|F5GY37_HUMAN;sp|Q99623|PHB2_HUMAN	24929484	10532472	57291404	3.18803e+06	53155408	94563376	0	FALSE
GVNC+57.021IDYYSGGDK+4.025PYLISGADDR+3.988LVK+4.025	sp|P35606|COPB2_HUMAN;sp|P35606-2|COPB2_HUMAN	17052694	9266182	53584560	4785462	55038184	108540440	0	FALSE
TLNDELEIIEGMK+4.025FDR+3.988	tr|E7EXB4|E7EXB4_HUMAN;tr|E7ESH4|E7ESH4_HUMAN;sp|P10809|CH60_HUMAN	17630174	9315960	49303336	4659118	50744152	110319392	0	FALSE
EQIVPK+4.025PEEEVAQK+4.025	tr|J3QQT2|J3QQT2_HUMAN;tr|A0A087WXM6|A0A087WXM6_HUMAN;tr|A0A0A0MRF8|A0A0A0MRF8_HUMAN;tr|A0A0A6YYL6|A0A0A6YYL6_HUMAN;tr|J3QLC8|J3QLC8_HUMAN;tr|J3KRX5|J3KRX5_HUMAN;sp|P18621|RL17_HUMAN;sp|P18621-2|RL17_HUMAN;sp|P18621-3|RL17_HUMAN	3.07826e+06	0	11562077	0	6580960	19782766	0	FALSE
AM+15.995GIMNSFVNDIFER+3.988	tr|U3KQK0|U3KQK0_HUMAN;sp|Q99877|H2B1N_HUMAN;sp|P23527|H2B1O_HUMAN;sp|P57053|H2BFS_HUMAN;sp|P62807|H2B1C_HUMAN;sp|P58876|H2B1D_HUMAN;sp|Q5QNW6|H2B2F_HUMAN;sp|Q5QNW6-2|H2B2F_HUMAN;sp|P06899|H2B1J_HUMAN;sp|O60814|H2B1K_HUMAN;sp|Q16778|H2B2E_HUMAN;sp|Q93079|H2B1H_HUMAN;sp|Q8N257|H2B3B_HUMAN;sp|P33778|H2B1B_HUMAN;sp|Q99880|H2B1L_HUMAN;sp|Q99879|H2B1M_HUMAN	7.85917e+06	0	8765545	7572892	21887454	0	0	FALSE
LFEYGGFPPESNYLFLGDYVDR+3.988	tr|F8W0W8|F8W0W8_HUMAN;tr|F8W0V8|F8W0V8_HUMAN;tr|A0A087WYY5|A0A087WYY5_HUMAN;tr|F8VR82|F8VR82_HUMAN;tr|F8VYE8|F8VYE8_HUMAN;tr|E9PMD7|E9PMD7_HUMAN;sp|P62136|PP1A_HUMAN;sp|P62136-2|PP1A_HUMAN;sp|P62136-3|PP1A_HUMAN;sp|P36873|PP1G_HUMAN;sp|P36873-2|PP1G_HUMAN	3.45756e+06	11667926	5631646	25133512	8455854	65239740	0	FALSE
NAGNC+57.021LSPAVIVGLLK+4.025	tr|A0A2C9F2M7|A0A2C9F2M7_HUMAN;tr|A0A286YF22|A0A286YF22_HUMAN;sp|O43175|SERA_HUMAN	8754068	13520850	24444990	31777288	33172940	47858676	0	FALSE
TAWVFDDK+4.025YK+4.025	tr|G3V4T5|G3V4T5_HUMAN;tr|H0YJS4|H0YJS4_HUMAN;sp|P05198|IF2A_HUMAN	12286841	4.43573e+06	29165184	2.29464e+06	21243828	45521392	0	FALSE
EELTAFLHPEEFPHMR+3.988	tr|M0QZH0|M0QZH0_HUMAN;sp|Q96D15|RCN3_HUMAN	3.56046e+06	882963	7.58849e+06	0	5793019	10062044	0	FALSE
GIVEFASK+4.025PAAR+3.988	sp|P23246|SFPQ_HUMAN;sp|P23246-2|SFPQ_HUMAN	8.072e+06	4.29512e+06	35550244	8151685	49372512	101402664	0	FALSE
DIVPGDIVEIAVGDK+4.025VPADIR+3.988	sp|P16615|AT2A2_HUMAN;sp|P16615-2|AT2A2_HUMAN;sp|P16615-3|AT2A2_HUMAN;sp|P16615-5|AT2A2_HUMAN	4.28013e+06	1.69662e+06	15029001	2.14693e+06	17230288	31193824	0	FALSE
VLEHQLLQTTK+4.025	tr|G3XAJ4|G3XAJ4_HUMAN;tr|F8WCJ3|F8WCJ3_HUMAN;tr|F8WBV5|F8WBV5_HUMAN;tr|B8ZZX4|B8ZZX4_HUMAN;sp|O14530|TXND9_HUMAN;sp|O14530-2|TXND9_HUMAN	11675423	7.91018e+06	13915404	1.24804e+06	24142910	49654004	0	FALSE
SLADELALVDVLEDK+4.025LK+4.025GEMMDLQHGSLFLQTPK+4.025	tr|A0A3B3IS95|A0A3B3IS95_HUMAN;tr|A8MW50|A8MW50_HUMAN;tr|F5H793|F5H793_HUMAN;tr|C9J7H8|C9J7H8_HUMAN;sp|P07195|LDHB_HUMAN	0	2.06001e+06	2.66605e+06	756856	2.02424e+06	3267684	0	FALSE
LNSSDPSLIGLK+4.025	sp|Q9UHI6|DDX20_HUMAN	15556091	6569487	32590686	3.42574e+06	34860768	67945808	0	FALSE
K+4.025QSLGELIGTLNAAK+4.025VPADTEVVC+57.021APPTAYIDFAR+3.988	sp|P60174|TPIS_HUMAN;sp|P60174-1|TPIS_HUMAN	7.2946e+06	3.65e+06	18103944	2142370	13964852	32907064	0.000356979	FALSE
ALSIPPNIDVLLC+57.021EQEVVADETPAVQAVLR+3.988	tr|H0YGW7|H0YGW7_HUMAN;sp|Q8NE71|ABCF1_HUMAN;sp|Q8NE71-2|ABCF1_HUMAN	15407994	11097157	7.9715e+06	35567292	0	18362506	0	FALSE
MK+4.025EIAEAYLGK+4.025	tr|E9PKE3|E9PKE3_HUMAN;tr|E9PQQ4|E9PQQ4_HUMAN;tr|E9PI65|E9PI65_HUMAN;tr|E9PLF4|E9PLF4_HUMAN;tr|E9PN89|E9PN89_HUMAN;tr|E9PPY6|E9PPY6_HUMAN;tr|E9PK54|E9PK54_HUMAN;tr|E9PQK7|E9PQK7_HUMAN;sp|P11142|HSP7C_HUMAN;sp|P11142-2|HSP7C_HUMAN	85465704	40430176	212885584	23577562	239229392	562908800	0	FALSE
ILENPQSLSDPNNYHEFC+57.021R+3.988	tr|E7ESC6|E7ESC6_HUMAN;sp|Q9UIA9|XPO7_HUMAN	8572483	4306073	21148984	4552858	25948938	41697480	0.000356979	FALSE
SEGGFIWAC+57.021K+4.025	sp|O75874|IDHC_HUMAN	39760528	13972738	110834536	8239488	93973072	143745232	0	FALSE
GLEISGTFTHR+3.988	tr|A0A087X253|A0A087X253_HUMAN;sp|P63010|AP2B1_HUMAN;sp|P63010-2|AP2B1_HUMAN;sp|P63010-3|AP2B1_HUMAN	30668096	14307831	32339980	2.7051e+06	44116892	55851372	0	FALSE
MVPAGM+15.995GAGLER+3.988	tr|A0A087X0X3|A0A087X0X3_HUMAN;tr|M0QZM1|M0QZM1_HUMAN;tr|M0R2I7|M0R2I7_HUMAN;sp|P52272|HNRPM_HUMAN;sp|P52272-2|HNRPM_HUMAN	17125246	5.13631e+06	26019444	3.04206e+06	29452882	73518840	0	FALSE
GQTLTLTQQQR+3.988	tr|B4E2Q0|B4E2Q0_HUMAN;tr|H0Y9S7|H0Y9S7_HUMAN;tr|H0Y8X9|H0Y8X9_HUMAN;tr|H0Y9V7|H0Y9V7_HUMAN;sp|P98194|AT2C1_HUMAN;sp|P98194-2|AT2C1_HUMAN;sp|P98194-3|AT2C1_HUMAN;sp|P98194-4|AT2C1_HUMAN;sp|P98194-5|AT2C1_HUMAN;sp|P98194-6|AT2C1_HUMAN;sp|P98194-7|AT2C1_HUMAN;sp|P98194-8|AT2C1_HUMAN;sp|P98194-9|AT2C1_HUMAN	6.48008e+06	9150258	7.0726e+06	2.81915e+06	18281160	29297736	0	FALSE
VK+4.025PFM+15.995TGAAEQIK+4.025	tr|A0A0B4J2C3|A0A0B4J2C3_HUMAN;tr|E9PJF7|E9PJF7_HUMAN;tr|J3KPG2|J3KPG2_HUMAN;tr|Q5W0H4|Q5W0H4_HUMAN;sp|P13693|TCTP_HUMAN;sp|P13693-2|TCTP_HUMAN;sp|Q56UQ5|TPT1L_HUMAN	3.37134e+06	3.71921e+06	12804317	5.29542e+06	7.36376e+06	24908538	0	FALSE
GK+4.025LEAIITPPPAK+4.025	tr|D6RCF2|D6RCF2_HUMAN;sp|O75367|H2AY_HUMAN;sp|O75367-2|H2AY_HUMAN;sp|O75367-3|H2AY_HUMAN	20049330	9490982	49897732	8519290	47458632	79617800	0	FALSE
K+4.025SAVADK+4.025HELLSLASSNHLGK+4.025	tr|B3KS98|B3KS98_HUMAN;tr|A0A087WZK9|A0A087WZK9_HUMAN;tr|E5RJT0|E5RJT0_HUMAN;sp|O15372|EIF3H_HUMAN	21119406	0	23755512	2.57305e+06	20747152	42645244	0	FALSE
DAALATALGDK+4.025K+4.025	tr|E9PBF6|E9PBF6_HUMAN;tr|A0A0D9SFY5|A0A0D9SFY5_HUMAN;tr|A0A0D9SFE5|A0A0D9SFE5_HUMAN;sp|P20700|LMNB1_HUMAN	8603210	11078242	23407314	644080	21964434	35957432	0	FALSE
VELHK+4.025NPEK+4.025EPYK+4.025	tr|A0A1B0GTE6|A0A1B0GTE6_HUMAN;tr|A0A0D9SFK7|A0A0D9SFK7_HUMAN;tr|A0A1B0GVY9|A0A1B0GVY9_HUMAN;tr|A0A1B0GUA3|A0A1B0GUA3_HUMAN;sp|Q96EK5|KBP_HUMAN	9915237	6.6279e+06	24097354	4.50636e+06	22990514	49396796	0.000960703	FALSE
MVVNEGSDGGQSVYHVHLHVLGGR+3.988	sp|P49773|HINT1_HUMAN	12304388	8356906	32316678	2.56233e+06	35168964	64776772	0.000394536	FALSE
YGEPGEVFINK+4.025	sp|P23246|SFPQ_HUMAN;sp|P23246-2|SFPQ_HUMAN	120046096	52637296	288137408	59854260	354613440	842138368	0	FALSE
SAAEMYGSSFDLDYDFQR+3.988DYYDR+3.988	tr|G3V2D6|G3V2D6_HUMAN;tr|B2R5W2|B2R5W2_HUMAN;tr|G3V251|G3V251_HUMAN;tr|G3V4W0|G3V4W0_HUMAN;tr|G3V4C1|G3V4C1_HUMAN;tr|B4DY08|B4DY08_HUMAN;sp|P07910-2|HNRPC_HUMAN;sp|P07910-4|HNRPC_HUMAN	2961553	3.5877e+06	9005774	0	7.80507e+06	14087379	0	FALSE
DLGTESQIFISR+3.988	sp|P50395|GDIB_HUMAN;sp|P50395-2|GDIB_HUMAN	50839792	17524064	114276424	9448020	106188720	175716448	0	FALSE
VTPGFEEK+4.025EGELLVR+3.988	tr|A0A3B3ISK9|A0A3B3ISK9_HUMAN;tr|F5H755|F5H755_HUMAN;tr|F5H362|F5H362_HUMAN;tr|F5H5A1|F5H5A1_HUMAN;sp|Q4G176|ACSF3_HUMAN	11588761	3531616	19991204	2282314	22562398	42681056	0	FALSE
LGC+57.021AMAC+57.021LNYNIR+3.988	sp|O14975|S27A2_HUMAN;sp|O14975-2|S27A2_HUMAN	1.49781e+06	28681490	1.14228e+06	8.17738e+06	61805092	0	0.000394536	FALSE
FC+57.021DNSSAIQGK+4.025	sp|O15067|PUR4_HUMAN	9585118	7.61898e+06	40302992	6.92839e+06	35470372	58733124	0	FALSE
SVTR+3.988PAFLYNPLNK+4.025	sp|Q8N6N3|CA052_HUMAN;sp|Q8N6N3-2|CA052_HUMAN;sp|Q8N6N3-3|CA052_HUMAN	5.17314e+06	1.90267e+06	13738258	2.25944e+06	13188201	26979784	0	FALSE
INISEGNC+57.021PER+3.988	tr|E9PFP8|E9PFP8_HUMAN;tr|F8VZX2|F8VZX2_HUMAN;tr|F8VXH9|F8VXH9_HUMAN;tr|F8W0G4|F8W0G4_HUMAN;tr|J3QT27|J3QT27_HUMAN;tr|F8VTZ0|F8VTZ0_HUMAN;tr|F8W1G6|F8W1G6_HUMAN;tr|H3BRU6|H3BRU6_HUMAN;sp|Q15366|PCBP2_HUMAN;sp|Q15366-2|PCBP2_HUMAN;sp|Q15366-3|PCBP2_HUMAN;sp|Q15366-4|PCBP2_HUMAN;sp|Q15366-5|PCBP2_HUMAN;sp|Q15366-6|PCBP2_HUMAN;sp|Q15366-7|PCBP2_HUMAN;sp|Q15366-8|PCBP2_HUMAN;sp|Q15365|PCBP1_HUMAN;sp|…	371984288	147221280	756988928	68007184	816286528	1456118656	0	FALSE
VGWEQLLTTIAR+3.988	tr|H9KV75|H9KV75_HUMAN;tr|H7C5W8|H7C5W8_HUMAN;tr|H0YJ11|H0YJ11_HUMAN;tr|H7C144|H7C144_HUMAN;tr|H0YJW3|H0YJW3_HUMAN;tr|F5GXS2|F5GXS2_HUMAN;sp|P12814|ACTN1_HUMAN;sp|P12814-2|ACTN1_HUMAN;sp|P12814-3|ACTN1_HUMAN;sp|P12814-4|ACTN1_HUMAN;sp|O43707|ACTN4_HUMAN;sp|O43707-2|ACTN4_HUMAN;sp|O43707-3|ACTN4_HUMAN	2.89103e+06	549193	3.19794e+06	1.12656e+06	1004227	6.03696e+06	0	FALSE
VAHALAEGLGVIAC+57.021IGEK+4.025	tr|U3KQF3|U3KQF3_HUMAN;tr|U3KPZ0|U3KPZ0_HUMAN;sp|P60174|TPIS_HUMAN;sp|P60174-1|TPIS_HUMAN;sp|P60174-4|TPIS_HUMAN	15955928	6.22351e+06	34989944	6.51317e+06	32407928	65029932	0	FALSE
AQNTWGC+57.021GNSLR+3.988	tr|Q5TCI8|Q5TCI8_HUMAN;tr|A0A0C4DGC5|A0A0C4DGC5_HUMAN;sp|P02545|LMNA_HUMAN;sp|P02545-2|LMNA_HUMAN;sp|P02545-3|LMNA_HUMAN;sp|P02545-4|LMNA_HUMAN;sp|P02545-5|LMNA_HUMAN;sp|P02545-6|LMNA_HUMAN	48998452	30918272	176340208	3.63721e+06	158646704	230203552	0	FALSE
ALEQQVEEMK+4.025TQLEELEDELQATEDAK+4.025	sp|P35579|MYH9_HUMAN;sp|P35579-2|MYH9_HUMAN	8584470	4046618	22151290	7243193	20563482	42950508	0	FALSE
TK+4.025TEISEMNR+3.988	sp|P05787|K2C8_HUMAN;sp|P05787-2|K2C8_HUMAN	74155832	28940698	23985258	4746019	29954410	37826636	0.000106883	FALSE
DGALTQLNVAFSR+3.988	tr|E7EMD0|E7EMD0_HUMAN;tr|H0Y4R2|H0Y4R2_HUMAN;sp|P16435|NCPR_HUMAN	62069784	22882864	134807632	4.08246e+06	121992472	236404720	0	FALSE
GGPEVQQVPAGER+3.988PLWFIC+57.021SGMGTQWR+3.988	tr|A0A0U1RQF0|A0A0U1RQF0_HUMAN;sp|P49327|FAS_HUMAN	41651420	35976944	107268280	10391616	68811848	93433024	0	FALSE
VC+57.021ENIPIVLC+57.021GNK+4.025VDIK+4.025DR+3.988	tr|B5MDF5|B5MDF5_HUMAN;tr|B4DV51|B4DV51_HUMAN;tr|F5H018|F5H018_HUMAN;tr|J3KQE5|J3KQE5_HUMAN;sp|P62826|RAN_HUMAN	12151496	1.83219e+06	15845342	1.58875e+06	14353189	26021132	0	FALSE
LIQSHPESAEDLQEK+4.025	tr|A0A0D9SF54|A0A0D9SF54_HUMAN;tr|A0A0D9SGF6|A0A0D9SGF6_HUMAN;sp|Q13813|SPTN1_HUMAN;sp|Q13813-2|SPTN1_HUMAN;sp|Q13813-3|SPTN1_HUMAN	6041917	3.03325e+06	14562174	1.37081e+06	15061832	26780960	0	FALSE
IEFEGQPVDFVDPNK+4.025QNLIAEVSTK+4.025DVK+4.025	tr|Q5R211|Q5R211_HUMAN;sp|P31327|CPSM_HUMAN;sp|P31327-3|CPSM_HUMAN	2924591	672118	11839835	0	13725408	12974181	0	FALSE
WNLDELPK+4.025FEK+4.025	tr|J3QR02|J3QR02_HUMAN;tr|J3KTA4|J3KTA4_HUMAN;tr|J3QRQ7|J3QRQ7_HUMAN;tr|J3KRX8|J3KRX8_HUMAN;tr|X6RLV5|X6RLV5_HUMAN;tr|J3KTQ4|J3KTQ4_HUMAN;sp|P17844|DDX5_HUMAN;sp|P17844-2|DDX5_HUMAN	17631160	6252096	34406812	4835815	62472456	135790000	0	FALSE
R+3.988DNYVPEVSALDQEIIEVDPDTK+4.025EMLK+4.025	tr|A0A075B716|A0A075B716_HUMAN;tr|H3BNC9|H3BNC9_HUMAN;tr|H0YN88|H0YN88_HUMAN;sp|P08708|RS17_HUMAN	95679232	43353696	203343008	27396074	166399136	306910688	0	FALSE
SDPIQEIR+3.988DLAEITTLDR+3.988	sp|Q9BS26|ERP44_HUMAN	45860580	13875388	38826192	2.95669e+06	41676652	108704728	0	FALSE
LTVLPPELGNLDLTGQK+4.025	sp|Q15404|RSU1_HUMAN;sp|Q15404-2|RSU1_HUMAN	3.68496e+06	394270	4277819	1.24261e+06	2.81469e+06	7.08421e+06	0	FALSE
YGYTHLSTGDLLR+3.988	tr|Q5T9B7|Q5T9B7_HUMAN;sp|P00568|KAD1_HUMAN	26611546	9157858	57808284	1623949	47082416	94173088	0	FALSE
LVLVGDGGTGK+4.025	tr|B5MDF5|B5MDF5_HUMAN;tr|J3KQE5|J3KQE5_HUMAN;tr|H0YFC6|H0YFC6_HUMAN;sp|P62826|RAN_HUMAN	4.28042e+06	2.45095e+06	8353828	1.5814e+06	7398147	14702512	0	FALSE
ITLQDVVSHSK+4.025	tr|H0YLE8|H0YLE8_HUMAN;tr|A0A0J9YXZ5|A0A0J9YXZ5_HUMAN;sp|P46940|IQGA1_HUMAN	8390469	2.11445e+06	15886440	2655425	20482036	24752840	0	FALSE
TAQEK+4.025DSLITPHVSR+3.988	tr|F8VYC4|F8VYC4_HUMAN;tr|J3KQ37|J3KQ37_HUMAN;tr|A0A1W2PNU4|A0A1W2PNU4_HUMAN;tr|H7BZ48|H7BZ48_HUMAN;tr|J3KNE0|J3KNE0_HUMAN;tr|A0A286YES2|A0A286YES2_HUMAN;sp|P49792|RBP2_HUMAN;sp|Q7Z3J3|RGPD4_HUMAN;sp|O14715|RGPD8_HUMAN;sp|Q99666|RGPD5_HUMAN;sp|P0DJD0|RGPD1_HUMAN;sp|P0DJD1|RGPD2_HUMAN;sp|A6NKT7|RGPD3_HUMAN	4.6031e+06	6205190	18075254	3.00149e+06	25404048	37406304	0.000106883	FALSE
ATENDIANFFSPLNPIR+3.988	sp|P31942|HNRH3_HUMAN;sp|P31942-2|HNRH3_HUMAN;sp|P31942-3|HNRH3_HUMAN;sp|P31942-4|HNRH3_HUMAN;sp|P31942-5|HNRH3_HUMAN;sp|P31942-6|HNRH3_HUMAN	21118240	1.85313e+06	8418123	19082098	7938623	4.14811e+06	0	FALSE
SLGEIPIVESEIK+4.025K+4.025EAGELK+4.025PEEEITVGPVQK+4.025	sp|P53618|COPB_HUMAN	55648048	14004271	93565688	8892037	97723200	187983200	0	FALSE
LQDEIQNM+15.995K+4.025EEM+15.995AR+3.988	tr|B0YJC4|B0YJC4_HUMAN;tr|B0YJC5|B0YJC5_HUMAN;sp|P08670|VIME_HUMAN	2.83153e+06	2.5407e+06	4635913	1.67067e+06	4.128e+06	11141182	0	FALSE
AFLLDPDR+3.988C+57.021VVQR+3.988	sp|Q9BTY7|HGH1_HUMAN	22613344	13597669	21409136	885675	31917264	42202548	0.000960703	FALSE
ISGLGLTPEQK+4.025	sp|O95831|AIFM1_HUMAN;sp|O95831-3|AIFM1_HUMAN;sp|O95831-4|AIFM1_HUMAN;sp|O95831-6|AIFM1_HUMAN	90236920	28886368	169838432	35693644	189060864	351866080	0	FALSE
ALNALC+57.021DGLIDELNQALK+4.025	sp|P30084|ECHM_HUMAN	20179018	8820892	44495748	5779323	42651612	77304328	0	FALSE
MIEDAER+3.988DGTLK+4.025PGDTIIEPTSGNTGIGLALAAAVR+3.988	tr|C9JMA6|C9JMA6_HUMAN;sp|P35520|CBS_HUMAN;sp|P35520-2|CBS_HUMAN;sp|P0DN79|CBSL_HUMAN	20225614	8574603	44519824	3.47243e+06	46256292	48345004	0	FALSE
GAVEAAHQAFPGWAGQSPGAR+3.988	tr|F5H4B6|F5H4B6_HUMAN;sp|Q8IZ83|A16A1_HUMAN;sp|Q8IZ83-3|A16A1_HUMAN	11509111	5.24836e+06	27571438	5.0646e+06	20087428	24386108	0	FALSE
EAVAMESYAK+4.025	tr|F5GWF6|F5GWF6_HUMAN;sp|P78371|TCPB_HUMAN;sp|P78371-2|TCPB_HUMAN	13184778	4573424	34363832	61405840	16441989	63790416	0	FALSE
VATQEGK+4.025EITC+57.021R+3.988	tr|B8ZZK2|B8ZZK2_HUMAN;tr|H7BZK5|H7BZK5_HUMAN;tr|M0QZK8|M0QZK8_HUMAN;sp|O75223|GGCT_HUMAN	25478740	7225160	41576464	3289270	42783912	71817672	0	FALSE
YGGDEIPFSPYR+3.988	tr|Q60FE5|Q60FE5_HUMAN;tr|A0A087WWY3|A0A087WWY3_HUMAN;sp|P21333|FLNA_HUMAN;sp|P21333-2|FLNA_HUMAN	144770080	37773868	260782672	24817450	261471248	562359936	0	FALSE
AVAPSPSGAIGGLLEQFAR+3.988	tr|C9JSR1|C9JSR1_HUMAN;sp|Q8NCE2|MTMRE_HUMAN;sp|Q8NCE2-2|MTMRE_HUMAN;sp|Q8NCE2-3|MTMRE_HUMAN	5.71888e+06	2341746	34634684	7877869	59195376	6.34897e+06	0.000829187	FALSE
VK+4.025TPSFGISAPQVSIPDVNVNLK+4.025GPK+4.025	sp|Q09666|AHNK_HUMAN	22981378	9194476	51032828	4.62091e+06	49575628	73638352	0	FALSE
MQASIEK+4.025GGSLPK+4.025VEAK+4.025	sp|P06748|NPM_HUMAN;sp|P06748-2|NPM_HUMAN	12857744	4.96505e+06	34593220	3.37396e+06	29945462	56455076	0	FALSE
DQELYFFHELSPGSC+57.021FFLPK+4.025	sp|P26639|SYTC_HUMAN;sp|P26639-2|SYTC_HUMAN	594684	0	788106	809231	498367	2.00744e+06	0	FALSE
FVYVWDTTSR+3.988R+3.988	tr|Q9NSS8|Q9NSS8_HUMAN;sp|Q96DI7|SNR40_HUMAN;sp|Q96DI7-2|SNR40_HUMAN	12193554	5627804	19938314	903400	24553908	20026906	0	FALSE
HFSGLEEAVYR+3.988	tr|H7C4C8|H7C4C8_HUMAN;sp|P50990|TCPQ_HUMAN;sp|P50990-2|TCPQ_HUMAN	40555916	13793458	85038504	7.80224e+06	85008560	185352592	0	FALSE
R+3.988LEAAYLDLQR+3.988	tr|E5RIW3|E5RIW3_HUMAN;tr|E5RHG6|E5RHG6_HUMAN;tr|E5RJD8|E5RJD8_HUMAN;sp|O75347|TBCA_HUMAN;sp|O75347-2|TBCA_HUMAN	79065848	53470420	168979456	39580020	222734752	252589392	0	FALSE
K+4.025VTLSTDK+4.025NK+4.025	tr|J3KR24|J3KR24_HUMAN;tr|A0A0A0MSX9|A0A0A0MSX9_HUMAN;sp|P41252|SYIC_HUMAN	0	1.21236e+06	12756616	5.09492e+06	9501313	14845521	0	FALSE
GC+57.021DVVVIPAGVPR+3.988	sp|P40926|MDHM_HUMAN;sp|P40926-2|MDHM_HUMAN	106500152	36034480	204349216	21283464	213796688	363500768	0	FALSE
IGISDISSLSEK+4.025	sp|Q5UIP0|RIF1_HUMAN;sp|Q5UIP0-2|RIF1_HUMAN	7862995	4831356	19077088	17119950	18385210	46359068	0	FALSE
YQLDK+4.025DGVVLFK+4.025	tr|I3L398|I3L398_HUMAN;tr|H7BZ94|H7BZ94_HUMAN;tr|I3L312|I3L312_HUMAN;tr|I3L3U6|I3L3U6_HUMAN;sp|P07237|PDIA1_HUMAN	9694318	5.19527e+06	21505278	3341720	19166366	50636172	0	FALSE
R+3.988VFIM+15.995DNC+57.021EELIPEYLNFIR+3.988	sp|P07900|HS90A_HUMAN;sp|P07900-2|HS90A_HUMAN	31539228	2.1543e+06	11257986	19101720	11049364	15541052	0.000356979	FALSE
K+4.025GGPSPGDVEAIK+4.025NAIANASTLAEVER+3.988	tr|H0YMA0|H0YMA0_HUMAN;tr|H0YLR3|H0YLR3_HUMAN;sp|P09661|RU2A_HUMAN	19874930	12240220	48033956	6208455	46650572	80384384	0	FALSE
SEVATLTAAGK+4.025	sp|P36542|ATPG_HUMAN;sp|P36542-2|ATPG_HUMAN	52864900	14340097	83668160	3.45614e+06	84799832	192410768	0	FALSE
LVPPEC+57.021HC+57.021VR+3.988	tr|B4E2Q0|B4E2Q0_HUMAN;tr|H0Y9V7|H0Y9V7_HUMAN;sp|P98194|AT2C1_HUMAN;sp|P98194-2|AT2C1_HUMAN;sp|P98194-3|AT2C1_HUMAN;sp|P98194-4|AT2C1_HUMAN;sp|P98194-5|AT2C1_HUMAN;sp|P98194-6|AT2C1_HUMAN;sp|P98194-7|AT2C1_HUMAN;sp|P98194-8|AT2C1_HUMAN;sp|P98194-9|AT2C1_HUMAN	6.38053e+06	723222	7497573	1.39278e+06	7969328	28259386	0	FALSE
SVYGGEFIQQLK+4.025	sp|Q9NQG5|RPR1B_HUMAN	35690900	145855664	8105399	10628822	33245748	61703340	0	FALSE
AVLGEVK+4.025LC+57.021EK+4.025	sp|P26641|EF1G_HUMAN;sp|P26641-2|EF1G_HUMAN	38228964	12206318	91251144	12104082	76038208	161341104	0	FALSE
LGDVYVNDAFGTAHR+3.988	sp|P00558|PGK1_HUMAN;sp|P00558-2|PGK1_HUMAN;sp|P07205|PGK2_HUMAN	0	22580620	12998521	45133504	16364387	17123466	0.000960703	FALSE
YEALK+4.025EPMVAR+3.988	tr|A0A0D9SF54|A0A0D9SF54_HUMAN;tr|A0A0D9SGF6|A0A0D9SGF6_HUMAN;sp|Q13813|SPTN1_HUMAN;sp|Q13813-2|SPTN1_HUMAN;sp|Q13813-3|SPTN1_HUMAN	7.10109e+06	1.35381e+06	20739582	1.05374e+06	13403943	24369312	0	FALSE
LIPDSIGK+4.025DIEK+4.025	tr|D6R9B6|D6R9B6_HUMAN;tr|D6RAT0|D6RAT0_HUMAN;tr|H0Y9Y4|H0Y9Y4_HUMAN;tr|D6RG13|D6RG13_HUMAN;tr|D6RB09|D6RB09_HUMAN;sp|P61247|RS3A_HUMAN	42681460	18817204	97893336	10305011	79258752	171196544	0	FALSE
LEK+4.025PAK+4.025YDDIK+4.025K+4.025	tr|E7EUT5|E7EUT5_HUMAN;sp|P04406|G3P_HUMAN;sp|P04406-2|G3P_HUMAN	1.21053e+06	2483811	8351799	965233	12089722	19805248	0	FALSE
VK+4.025TPSFGISAPQVSIPDVNVNLK+4.025GPK+4.025	sp|Q09666|AHNK_HUMAN	23091964	11325807	49524356	4.54048e+06	48570612	73131344	0	FALSE
AVIEHNLLSASK+4.025	tr|D6RD63|D6RD63_HUMAN;tr|D6RAX7|D6RAX7_HUMAN;tr|D6RFN0|D6RFN0_HUMAN;sp|Q9BT78|CSN4_HUMAN;sp|Q9BT78-2|CSN4_HUMAN	16078207	2.39538e+06	38328304	8649099	32413402	77951696	0	FALSE
MQHLNPDPQLIPEQITTDITPEC+57.021LVSPR+3.988	tr|A0A0U1RRM8|A0A0U1RRM8_HUMAN;tr|H0YJ34|H0YJ34_HUMAN;tr|H0YJB6|H0YJB6_HUMAN;sp|Q96AC1|FERM2_HUMAN;sp|Q96AC1-2|FERM2_HUMAN;sp|Q96AC1-3|FERM2_HUMAN	24498530	6008266	48299012	23978382	31826598	77524856	0	FALSE
GGAAVDPDSGLEHSAHVLEK+4.025	sp|P09874|PARP1_HUMAN	42802344	16392368	97479048	27578460	114213352	222053680	0	FALSE
NIEDVIAQGIGK+4.025	tr|H0YDD8|H0YDD8_HUMAN;sp|P05387|RLA2_HUMAN	1.06136e+06	1.11653e+06	5428158	755321	3504585	8700981	0	FALSE
VIHDNFGIVEGLM+15.995TTVHAITATQK+4.025	tr|E7EUT5|E7EUT5_HUMAN;sp|P04406|G3P_HUMAN;sp|P04406-2|G3P_HUMAN	10889320	0	18493234	2.92814e+06	10466820	23892154	0	FALSE
ITNDFYPEEDGK+4.025TK+4.025	tr|C9JZG1|C9JZG1_HUMAN;sp|P55884|EIF3B_HUMAN;sp|P55884-2|EIF3B_HUMAN	43860100	26542606	98693960	14740067	187510768	198627360	0	FALSE
MGLVDQLVEPLGPGLK+4.025PPEER+3.988	tr|H0YFD6|H0YFD6_HUMAN;tr|A0A2R8Y4F5|A0A2R8Y4F5_HUMAN;tr|A0A2R8YG21|A0A2R8YG21_HUMAN;tr|A0A2R8Y688|A0A2R8Y688_HUMAN;sp|P40939|ECHA_HUMAN	7059804	1.94225e+06	20908062	470249	21239706	25991048	0	FALSE
NAVEEYVYEM+15.995R+3.988	tr|A0A087WYC1|A0A087WYC1_HUMAN;sp|P34932|HSP74_HUMAN	1901.92	414115	1.21693e+06	814986	0	2.85961e+06	0	FALSE
MIYASSK+4.025DAIK+4.025	tr|G3V1A4|G3V1A4_HUMAN;tr|E9PQB7|E9PQB7_HUMAN;tr|E9PP50|E9PP50_HUMAN;tr|F6RFD5|F6RFD5_HUMAN;tr|E9PK25|E9PK25_HUMAN;sp|P60981|DEST_HUMAN;sp|P60981-2|DEST_HUMAN;sp|P23528|COF1_HUMAN;sp|Q9Y281|COF2_HUMAN;sp|Q9Y281-3|COF2_HUMAN	28380920	13744988	81834472	18220288	78071136	126183504	0	FALSE
LIPDSIGK+4.025DIEK+4.025	tr|D6R9B6|D6R9B6_HUMAN;tr|D6RAT0|D6RAT0_HUMAN;tr|H0Y9Y4|H0Y9Y4_HUMAN;tr|D6RG13|D6RG13_HUMAN;tr|D6RB09|D6RB09_HUMAN;sp|P61247|RS3A_HUMAN	102610840	50222308	218188448	23500828	182038944	374840672	0	FALSE
IVALSSSLSNAK+4.025	tr|B4E0P5|B4E0P5_HUMAN;sp|O75643|U520_HUMAN	32884124	2.28777e+06	28985706	188897	46409156	88152016	0	FALSE
AVAHHTTAAFIR+3.988	sp|P43686|PRS6B_HUMAN;sp|P43686-2|PRS6B_HUMAN	27766658	9377309	63195652	3.431e+06	54758424	123413456	0	FALSE
K+4.025YAVLYQPLFDK+4.025R+3.988	tr|B7Z9C2|B7Z9C2_HUMAN;tr|F8W0J6|F8W0J6_HUMAN;tr|F8VRJ2|F8VRJ2_HUMAN;tr|H0YHC3|H0YHC3_HUMAN;tr|F8W118|F8W118_HUMAN;tr|F8VV59|F8VV59_HUMAN;tr|F8W543|F8W543_HUMAN;tr|F8W020|F8W020_HUMAN;tr|H0YIV4|H0YIV4_HUMAN;tr|F5H4R6|F5H4R6_HUMAN;tr|F8VY35|F8VY35_HUMAN;tr|H0YH88|H0YH88_HUMAN;tr|F8VVB5|F8VVB5_HUMAN;sp|P55209|NP1L1_HUMAN;sp|P55209-2|NP1L1_HUMAN	15000722	6377801	43136432	3131418	44912864	97233224	0	FALSE
NR+3.988PPLPAGTNSK+4.025	tr|G5E972|G5E972_HUMAN;sp|P42166|LAP2A_HUMAN;sp|P42167|LAP2B_HUMAN;sp|P42167-2|LAP2B_HUMAN;sp|P42167-3|LAP2B_HUMAN	22530048	8946531	47986748	1.82098e+06	53450036	93033968	0	FALSE
LR+3.988LPLDK+4.025EPAR+3.988EC+57.021AQR+3.988	tr|H0YDN1|H0YDN1_HUMAN;sp|Q15149|PLEC_HUMAN;sp|Q15149-2|PLEC_HUMAN;sp|Q15149-3|PLEC_HUMAN;sp|Q15149-4|PLEC_HUMAN;sp|Q15149-5|PLEC_HUMAN;sp|Q15149-6|PLEC_HUMAN;sp|Q15149-7|PLEC_HUMAN;sp|Q15149-8|PLEC_HUMAN;sp|Q15149-9|PLEC_HUMAN	36570044	14589549	86592064	8663650	86757096	186381088	0	FALSE
LVEDMENK+4.025IR+3.988	tr|B1AK88|B1AK88_HUMAN;tr|B1AK87|B1AK87_HUMAN;sp|P47756|CAPZB_HUMAN;sp|P47756-2|CAPZB_HUMAN	19336202	6941430	40908740	4575752	36820644	76930272	0	FALSE
FVHDNYVIR+3.988R+3.988	sp|P31327|CPSM_HUMAN;sp|P31327-2|CPSM_HUMAN;sp|P31327-3|CPSM_HUMAN	33371466	16343851	86083760	19588372	118314088	166659888	0	FALSE
IWGLDFGDC+57.021HK+4.025	sp|Q9UNX4|WDR3_HUMAN	7365578	3.57031e+06	16486953	624554	13543058	22750762	0	FALSE
TTDLLTDWEK+4.025	sp|Q14204|DYHC1_HUMAN	21392426	5930195	41690720	2.07128e+06	46680824	85785736	0	FALSE
SLVLDTK+4.025DLTIEK+4.025	tr|B4DEH5|B4DEH5_HUMAN;sp|P09960|LKHA4_HUMAN;sp|P09960-2|LKHA4_HUMAN	8.24883e+06	1.44394e+06	18557614	3242444	16830942	30008912	0	FALSE
LGIHSALLDEK+4.025K+4.025DQDSK+4.025	sp|Q86SX6|GLRX5_HUMAN	12831335	3511857	15848708	2.69518e+06	20429270	45770464	0	FALSE
TTDLLTDWEK+4.025	sp|Q14204|DYHC1_HUMAN	22020090	9994937	42455824	1.78234e+06	51845652	83238536	0	FALSE
VYVGNLGNNGNK+4.025TELER+3.988	tr|A0A087X2D0|A0A087X2D0_HUMAN;sp|P84103|SRSF3_HUMAN;sp|P84103-2|SRSF3_HUMAN	30033592	20303600	62858492	0	71954264	154078800	0	FALSE
VANVSLLALYK+4.025	sp|P62266|RS23_HUMAN	2.63542e+06	1.70123e+06	4389015	785754	4373265	9284778	0	FALSE
ALIEMEK+4.025QQQDQVDR+3.988	tr|H7C367|H7C367_HUMAN;tr|C9JYS8|C9JYS8_HUMAN;sp|Q15233|NONO_HUMAN;sp|Q15233-2|NONO_HUMAN	31250620	14572368	79907536	7863193	90183216	183459104	0	FALSE
MSAYSGITDVIIGMPHR+3.988	sp|Q96HY7|DHTK1_HUMAN	18758478	41057004	8946489	55027240	96393808	1.45035e+06	0.000106883	FALSE
VAAK+4.025LEVAPISDIIAIK+4.025SPDTFVR+3.988	tr|H0YL12|H0YL12_HUMAN;tr|H0YKF0|H0YKF0_HUMAN;tr|H0YK49|H0YK49_HUMAN;tr|H0YNX6|H0YNX6_HUMAN;tr|H0YLU7|H0YLU7_HUMAN;sp|P13804|ETFA_HUMAN;sp|P13804-2|ETFA_HUMAN	4.75887e+06	1.46505e+06	18268330	2.39015e+06	15108929	29032634	0	FALSE
GHR+3.988IEEVPELPLVVEDK+4.025VEGYK+4.025K+4.025	tr|H3BM89|H3BM89_HUMAN;sp|P36578|RL4_HUMAN	56886336	28748026	158463680	13055692	121733840	219119200	0	FALSE
SWFEGQGLAGK+4.025	tr|A0A1W2PNX8|A0A1W2PNX8_HUMAN;sp|Q9H3U1|UN45A_HUMAN;sp|Q9H3U1-2|UN45A_HUMAN	8477278	3.98319e+06	29186046	1956911	36234636	41930888	0	FALSE
GGPTVDPEELFR+3.988	sp|Q96EY1|DNJA3_HUMAN;sp|Q96EY1-2|DNJA3_HUMAN	25124388	6111235	43424696	5.10498e+06	46598932	89909184	0	FALSE
AYAQQLTEWAR+3.988	tr|A0A0U1RR22|A0A0U1RR22_HUMAN;tr|B0QYG8|B0QYG8_HUMAN;tr|B0QYG7|B0QYG7_HUMAN;sp|Q9UNF0|PACN2_HUMAN;sp|Q9UNF0-2|PACN2_HUMAN	20540412	9287493	52129108	12720087	53735788	83039200	0	FALSE
R+3.988FDVSGYPTLK+4.025	sp|P13667|PDIA4_HUMAN	19165748	7585456	48092420	4.50654e+06	51261972	107450856	0	FALSE
IDIQIK+4.025DAIGR+3.988	sp|P26639|SYTC_HUMAN;sp|P26639-2|SYTC_HUMAN	21441230	9168865	30777670	2.33322e+06	33176058	41166936	0	FALSE
VK+4.025PFM+15.995TGAAEQIK+4.025	tr|A0A0B4J2C3|A0A0B4J2C3_HUMAN;tr|E9PJF7|E9PJF7_HUMAN;tr|J3KPG2|J3KPG2_HUMAN;tr|Q5W0H4|Q5W0H4_HUMAN;sp|P13693|TCTP_HUMAN;sp|P13693-2|TCTP_HUMAN;sp|Q56UQ5|TPT1L_HUMAN	22893550	8425736	43626076	3.55414e+06	33879476	88823312	0	FALSE
GGIM+15.995LPEK+4.025SQGK+4.025	tr|S4R3N1|S4R3N1_HUMAN;tr|B8ZZL8|B8ZZL8_HUMAN;sp|P61604|CH10_HUMAN	5603205	2.62031e+06	9323691	2.1607e+06	8768184	29176950	0	FALSE
SSGFLPASQQAC+57.021AK+4.025	tr|H7C008|H7C008_HUMAN;sp|Q6NUQ4|TM214_HUMAN;sp|Q6NUQ4-2|TM214_HUMAN	19335294	5601528	38686312	4645722	35431112	67256120	0	FALSE
GFGFVTFSSMAEVDAAMAAR+3.988PHSIDGR+3.988	tr|A0A087WUI2|A0A087WUI2_HUMAN;sp|P22626|ROA2_HUMAN;sp|P22626-2|ROA2_HUMAN	1.04259e+06	685028	1.57675e+06	388892	1.48086e+06	2.74196e+06	0	FALSE
NAAQFLLSTNDK+4.025	sp|P63151|2ABA_HUMAN;sp|P63151-2|2ABA_HUMAN	20432232	24133710	71363952	4839488	36647556	105403584	0	FALSE
TLLSVPGYK+4.025EK+4.025	tr|A0A140T936|A0A140T936_HUMAN;sp|P26640|SYVC_HUMAN;sp|P26640-2|SYVC_HUMAN	14579277	5.45703e+06	23815232	2028327	22427120	35140596	0	FALSE
K+4.025EVK+4.025GDLENAFLNLVQC+57.021IQNK+4.025PLYFADR+3.988	tr|H0YM50|H0YM50_HUMAN;sp|P07355|ANXA2_HUMAN;sp|P07355-2|ANXA2_HUMAN	11859674	6.44582e+06	50590940	1.84201e+06	38161024	67018824	0	FALSE
SLLGK+4.025DVLFLK+4.025	sp|P00558|PGK1_HUMAN;sp|P00558-2|PGK1_HUMAN;sp|P07205|PGK2_HUMAN	0	15260481	14875436	0	22478638	9077956	0.000106883	FALSE
DTLLTLAGC+57.021TPYEVR+3.988	sp|Q9H1B7|I2BPL_HUMAN	6388036	0	95120424	96193112	0	2.63062e+06	0	FALSE
VHLVGIDIFTGK+4.025	tr|I3L397|I3L397_HUMAN;tr|C9J4W5|C9J4W5_HUMAN;tr|F8WCJ1|F8WCJ1_HUMAN;tr|C9J7B5|C9J7B5_HUMAN;tr|I3L504|I3L504_HUMAN;sp|P63241|IF5A1_HUMAN;sp|P63241-2|IF5A1_HUMAN;sp|Q9GZV4|IF5A2_HUMAN;sp|Q6IS14|IF5AL_HUMAN	2.64522e+06	778736	6230980	618649	5.04672e+06	11278865	0	FALSE
QAVTNPNNTFYATK+4.025	tr|D6RA73|D6RA73_HUMAN;tr|D6RJI2|D6RJI2_HUMAN;tr|A0A3B3ITI4|A0A3B3ITI4_HUMAN;sp|P38646|GRP75_HUMAN	4.76394e+06	5507787	7.14332e+06	11117165	4742885	19103408	0	FALSE
ESYSIYVYK+4.025	sp|P23527|H2B1O_HUMAN;sp|P06899|H2B1J_HUMAN;sp|Q16778|H2B2E_HUMAN;sp|Q8N257|H2B3B_HUMAN;sp|P33778|H2B1B_HUMAN;sp|Q6DN03|H2B2C_HUMAN;sp|Q6DRA6|H2B2D_HUMAN	177824112	173698096	904606528	60694212	691452480	809978496	0	FALSE
SLGEIPIVESEIK+4.025K+4.025EAGELK+4.025PEEEITVGPVQK+4.025	sp|P53618|COPB_HUMAN	52992784	19531002	109279744	10213342	113070808	205768800	0	FALSE
TAFDDAIAELDTLNEDSYK+4.025DSTLIMQLLR+3.988	sp|P61981|1433G_HUMAN	4750357	3.61601e+06	9061642	896756	7229767	13890043	0	FALSE
VLSGISFEVPAGK+4.025K+4.025	tr|A0A2R8Y473|A0A2R8Y473_HUMAN;tr|A0A087WW65|A0A087WW65_HUMAN;tr|B4DGL8|B4DGL8_HUMAN;sp|O75027|ABCB7_HUMAN;sp|O75027-2|ABCB7_HUMAN;sp|O75027-3|ABCB7_HUMAN	5.74113e+06	2.24871e+06	12675948	208200	9263752	21507008	0	FALSE
NLLESYHVPELIK+4.025DAHLLVESK+4.025	sp|P42704|LPPRC_HUMAN	10612369	4917873	24773404	3.70404e+06	24152422	42508016	0	FALSE
ETNLDSLPLVDTHSK+4.025R+3.988	sp|P08670|VIME_HUMAN	26625604	71330256	67034784	115148904	77658680	88311344	0	FALSE
STLTDSLVC+57.021K+4.025	sp|P13639|EF2_HUMAN	787421632	223659072	1345909376	242613152	1151114752	2465821952	0	FALSE
SLPADILYEDQQC+57.021LVFR+3.988	sp|Q9BX68|HINT2_HUMAN	3.60617e+06	3.04554e+06	10484830	797218	8473791	12970248	0	FALSE
QNPFWWTHQR+3.988	tr|I3L3Z8|I3L3Z8_HUMAN;sp|Q6P2Q9|PRP8_HUMAN	2.93973e+06	288397	6188950	205180	7612445	14572250	0	FALSE
LPVQTSPEGLDAAFIGVPLDTGTSNR+3.988PGAR+3.988	sp|Q9BSE5|SPEB_HUMAN	1464324	0.621812	1.86477e+06	86.2799	4956710	9348221	0	FALSE
IR+3.988ELESQISELQEDLESER+3.988	sp|P35579|MYH9_HUMAN	9516611	3.81556e+06	16361134	1.87769e+06	12153772	44179140	0	FALSE
VIQPHGGGSNPLEGTQHLQDVPYVM+15.995VR+3.988	sp|Q14126|DSG2_HUMAN	28668360	6.9414e+06	24696876	4.85675e+06	20883634	39012156	0.000106883	FALSE
K+4.025QQISLATQM+15.995VR+3.988	tr|E9PCA1|E9PCA1_HUMAN;tr|E7ENZ3|E7ENZ3_HUMAN;tr|B7ZAR1|B7ZAR1_HUMAN;sp|P48643|TCPE_HUMAN;sp|P48643-2|TCPE_HUMAN	1.62549e+06	1.50934e+06	5.46074e+06	0	4343461	18821090	0	FALSE
TEMENEFVLIK+4.025K+4.025	tr|F8VP67|F8VP67_HUMAN;tr|F8VUG2|F8VUG2_HUMAN;tr|F8W1U3|F8W1U3_HUMAN;sp|P05787|K2C8_HUMAN;sp|P05787-2|K2C8_HUMAN	36803804	14229841	87955184	7298244	58464088	144855904	0	FALSE
HQGVM+15.995VGM+15.995GQK+4.025	tr|G5E9R0|G5E9R0_HUMAN;tr|C9JZR7|C9JZR7_HUMAN;tr|A0A2R8YGF8|A0A2R8YGF8_HUMAN;tr|C9JUM1|C9JUM1_HUMAN;tr|K7EM38|K7EM38_HUMAN;tr|F8WB63|F8WB63_HUMAN;tr|I3L3R2|I3L3R2_HUMAN;tr|I3L1U9|I3L1U9_HUMAN;tr|I3L3I0|I3L3I0_HUMAN;tr|C9JFL5|C9JFL5_HUMAN;tr|E7EVS6|E7EVS6_HUMAN;tr|J3KT65|J3KT65_HUMAN;tr|F6QUT6|F6QUT6_HUMAN;tr|B8ZZJ2|B8ZZJ2_HUMAN;tr|A6NL76|A6NL76_HUMAN;tr|F6UVQ4|F6UVQ4_HUMAN;tr|A0A2R8Y793|A0A2R8Y79…	24998276	7.77901e+06	60963824	10989864	35648568	96042840	0	FALSE
R+3.988VFIMDNC+57.021EELIPEYLNFIR+3.988	sp|P07900|HS90A_HUMAN;sp|P07900-2|HS90A_HUMAN	2.67115e+06	4.65544e+06	8448817	3.13898e+06	8.15617e+06	9640163	0.000209315	FALSE
IDNSQVESGSLEDDWDFLPPK+4.025	tr|K7EJB9|K7EJB9_HUMAN;sp|P27797|CALR_HUMAN	23704728	0	38398840	21188652	35942168	71019664	0	FALSE
DVFR+3.988DPALK+4.025R+3.988	tr|K7ELC7|K7ELC7_HUMAN;sp|P61353|RL27_HUMAN	33952904	22761470	73278680	7985236	60950840	122623168	0	FALSE
GIHEYDFEIK+4.025	sp|Q14344|GNA13_HUMAN;sp|Q14344-2|GNA13_HUMAN	5.1328e+06	691870	10476145	735599	13358091	21038072	0	FALSE
AIIIFVPVPQLK+4.025	tr|B5MCP9|B5MCP9_HUMAN;sp|P62081|RS7_HUMAN	30148768	33080768	49791800	9873521	30031620	58142392	0	FALSE
VLLGETGK+4.025EK+4.025	tr|M0QZC5|M0QZC5_HUMAN;tr|M0R1H6|M0R1H6_HUMAN;sp|P62280|RS11_HUMAN	78565408	37198524	173051184	14405998	129952928	237895696	0	FALSE
K+4.025GSFSALVGR+3.988	tr|A0A087WWN2|A0A087WWN2_HUMAN;sp|Q13619|CUL4A_HUMAN	14582156	5171760	20485822	707476	17761302	46016152	0	FALSE
FYTEDSPGLK+4.025	tr|S4R3B5|S4R3B5_HUMAN;sp|P60468|SC61B_HUMAN	24539014	8145262	40076040	8747639	42675872	133022936	0	FALSE
GIFPVLC+57.021K+4.025DPVQEAWAEDVDLR+3.988	tr|B4DNK4|B4DNK4_HUMAN;tr|H3BR70|H3BR70_HUMAN;sp|P14618|KPYM_HUMAN;sp|P14618-2|KPYM_HUMAN;sp|P14618-3|KPYM_HUMAN	14768252	9864766	49543572	7.17447e+06	39322828	70619064	0	FALSE
IEEFVYEK+4.025LDR+3.988	tr|A0A087WW40|A0A087WW40_HUMAN;sp|Q9Y371|SHLB1_HUMAN;sp|Q9Y371-2|SHLB1_HUMAN	4532265	2.10296e+06	27331140	737834	14425103	22853668	0	FALSE
TQSSLVPALTDFVR+3.988	tr|C9IZG4|C9IZG4_HUMAN;sp|O60888|CUTA_HUMAN;sp|O60888-2|CUTA_HUMAN;sp|O60888-3|CUTA_HUMAN	237556864	68570856	479523104	14832099	456909664	775866944	0	FALSE
K+4.025LFVGGIK+4.025EDTEEHHLR+3.988DYFEEYGK+4.025IDTIEIITDR+3.988	tr|A0A087WUI2|A0A087WUI2_HUMAN;sp|P22626|ROA2_HUMAN;sp|P22626-2|ROA2_HUMAN	15346765	10265404	39819036	5340608	41604612	69837160	0	FALSE
MADEAILQER+3.988	sp|Q9HCD5|NCOA5_HUMAN	5.08858e+06	3.28551e+06	15577344	4565707	20315018	36151128	0	FALSE
MK+4.025EIAEAYLGK+4.025	tr|E9PKE3|E9PKE3_HUMAN;tr|E9PQQ4|E9PQQ4_HUMAN;tr|E9PI65|E9PI65_HUMAN;tr|E9PLF4|E9PLF4_HUMAN;tr|E9PN89|E9PN89_HUMAN;tr|E9PPY6|E9PPY6_HUMAN;tr|E9PK54|E9PK54_HUMAN;tr|E9PQK7|E9PQK7_HUMAN;sp|P11142|HSP7C_HUMAN;sp|P11142-2|HSP7C_HUMAN	180406224	76458240	397720992	47492260	432338880	1027559232	0	FALSE
SVLELIPELNEK+4.025EEAYNSLMK+4.025	tr|H7C3W8|H7C3W8_HUMAN;sp|P42704|LPPRC_HUMAN	1.83066e+06	1.45313e+06	13598794	901322	14970741	20275342	0	FALSE
LDDLALLEDLEK+4.025QR+3.988	sp|Q13523|PRP4B_HUMAN	0	6.33385e+06	3616172	49773212	59174160	49564864	0	FALSE
EDGLAQQQTQLNLR+3.988	tr|A0A0U1RQF0|A0A0U1RQF0_HUMAN;sp|P49327|FAS_HUMAN	1.87128e+06	3.4825e+06	11171304	1.09435e+06	8.18155e+06	10470490	0	FALSE
AQAAAPASVPAQAPK+4.025	tr|A0A3B3ITT5|A0A3B3ITT5_HUMAN;sp|P47914|RL29_HUMAN	19346322	4.73293e+06	31450376	12232177	26856246	59733268	0	FALSE
ISEYSEAAITIR+3.988	tr|A0A0C4DG89|A0A0C4DG89_HUMAN;sp|Q7L014|DDX46_HUMAN	742852	15596859	32351936	810756	0	8578079	0	FALSE
EALLDESR+3.988PLFER+3.988	sp|Q9BU89|DOHH_HUMAN	5187877	1.11503e+06	8960442	1.40052e+06	11341813	22992024	0.000960703	FALSE
ITQAVLGAHDGGVFGLC+57.021ALR+3.988	tr|K7EKG3|K7EKG3_HUMAN;tr|A0A0C4DGQ7|A0A0C4DGQ7_HUMAN;tr|K7EII6|K7EII6_HUMAN;tr|K7EIK7|K7EIK7_HUMAN;tr|C9JRL6|C9JRL6_HUMAN;sp|O95834|EMAL2_HUMAN;sp|O95834-2|EMAL2_HUMAN;sp|O95834-3|EMAL2_HUMAN	1.52943e+06	97741.6	2.35601e+06	248819	1.04137e+06	719093	0.000209315	FALSE
VATPVDWK+4.025DGDSVM+15.995VLPTIPEEEAK+4.025	sp|P30041|PRDX6_HUMAN	55325484	30820366	107099088	22582376	83518160	176952432	0	FALSE
VLQLYPNNK+4.025	tr|H0YFG2|H0YFG2_HUMAN;sp|Q02790|FKBP4_HUMAN	110555056	30701118	226378240	33464594	221535056	414501568	0	FALSE
TNEK+4.025VELQELNDR+3.988FANYIDK+4.025VR+3.988	tr|B0YJC4|B0YJC4_HUMAN;tr|A0A1B0GTT5|A0A1B0GTT5_HUMAN;sp|P08670|VIME_HUMAN	44922748	17459976	89867992	8891684	106077888	163737792	0	FALSE
IILDLISESPIK+4.025	tr|Q5T6W2|Q5T6W2_HUMAN;sp|P61978|HNRPK_HUMAN;sp|P61978-2|HNRPK_HUMAN;sp|P61978-3|HNRPK_HUMAN	323270	706801	1.95379e+06	478007	1.93093e+06	5068937	0	FALSE
YLPDIIK+4.025DQK+4.025	sp|O15355|PPM1G_HUMAN	9280959	4478647	23196108	2412450	23875964	37897920	0	FALSE
LDPIQPSDVLSLLDNR+3.988	sp|Q6ZRP7|QSOX2_HUMAN	2.83496e+06	2.9533e+06	19074248	6.48257e+06	12766850	29723774	0	FALSE
GTYLATFHQR+3.988	tr|C9JQN7|C9JQN7_HUMAN;sp|P55884|EIF3B_HUMAN;sp|P55884-2|EIF3B_HUMAN	0	0	0	2238466	65608204	142933168	0	FALSE
VATMLATGGNR+3.988	sp|Q9H3K2|GHITM_HUMAN	20995078	3.03295e+06	18691752	17099140	38872768	49126060	0	FALSE
WDQSTFLGR+3.988	tr|A0A0A0MS41|A0A0A0MS41_HUMAN;tr|A0A1P0AYU5|A0A1P0AYU5_HUMAN;tr|S4R3N9|S4R3N9_HUMAN;sp|Q9BWM7|SFXN3_HUMAN	13799952	6420698	27295188	2.74112e+06	28339720	52613712	0	FALSE
WDQSTFIGR+3.988	tr|S4R2X2|S4R2X2_HUMAN;tr|D6RFI0|D6RFI0_HUMAN;tr|D6RAE9|D6RAE9_HUMAN;tr|D6RDG7|D6RDG7_HUMAN;sp|Q9H9B4|SFXN1_HUMAN	13799952	6420698	27295188	2.74112e+06	28339720	52613712	0	FALSE
TK+4.025PYIQVDIGGGQTK+4.025	sp|P11021|BIP_HUMAN	30215680	13184017	84352528	6524808	73462496	159950560	0	FALSE
GNK+4.025PWISLPR+3.988	sp|P62701|RS4X_HUMAN	67770544	33641964	146737600	10141658	138562048	259496896	0	FALSE
FIIHAPPGEFNEVFNDVR+3.988	tr|C9JUG7|C9JUG7_HUMAN;tr|A0A0D9SET8|A0A0D9SET8_HUMAN;tr|F8W9N7|F8W9N7_HUMAN;sp|P47755|CAZA2_HUMAN;sp|P47755-2|CAZA2_HUMAN	32614208	6667747	61750992	5.6338e+06	55547460	136091984	0	FALSE
LVEPGSPAEK+4.025	tr|J3QRP6|J3QRP6_HUMAN;sp|O14745|NHRF1_HUMAN	39479252	11251171	64153016	31098136	63666832	112997288	0	FALSE
WSQLLANSAAR+3.988	tr|A0A0D9SF54|A0A0D9SF54_HUMAN;tr|A0A0D9SGF6|A0A0D9SGF6_HUMAN;sp|Q13813|SPTN1_HUMAN;sp|Q13813-2|SPTN1_HUMAN;sp|Q13813-3|SPTN1_HUMAN	3.79735e+06	4.36015e+06	20714378	10903450	18436638	46340664	0	FALSE
IK+4.025EDEDDK+4.025TVLDLAVVLFETATLR+3.988	tr|H0YIV0|H0YIV0_HUMAN;sp|P14625|ENPL_HUMAN	3.00764e+06	1.64246e+06	4.32589e+06	1.74024e+06	2.53163e+06	6347813	0	FALSE
GGGTLC+57.021AQLPALWK+4.025	sp|O00115|DNS2A_HUMAN;sp|O00115-2|DNS2A_HUMAN	8434919	5.92765e+06	13514176	1.38563e+06	16128490	20694388	0	FALSE
ATTPVIMVGPGTGVAPFIGFIQER+3.988	tr|E7EMD0|E7EMD0_HUMAN;tr|H0Y4R2|H0Y4R2_HUMAN;sp|P16435|NCPR_HUMAN	39174904	8602290	77878016	9681122	67950448	129888568	0	FALSE
ESYSIYVYK+4.025	sp|P23527|H2B1O_HUMAN;sp|P06899|H2B1J_HUMAN;sp|Q16778|H2B2E_HUMAN;sp|Q8N257|H2B3B_HUMAN;sp|P33778|H2B1B_HUMAN;sp|Q6DN03|H2B2C_HUMAN;sp|Q6DRA6|H2B2D_HUMAN	1503673344	537254720	2957764864	341600064	2776995072	5026352128	0	FALSE
AGNFYVPAEPK+4.025	tr|A8MUD9|A8MUD9_HUMAN;tr|C9JIJ5|C9JIJ5_HUMAN;tr|C9JZ88|C9JZ88_HUMAN;sp|P18124|RL7_HUMAN	65132752	17212846	120874576	30349632	105716096	176270448	0	FALSE
[truncated: 2,777 more rows]

## Sheet: Fr2
Peptide	MatchedProteins	Quantity_1	Quantity_2	Quantity_3	Quantity_4	Quantity_5	Quantity_6	QValue	Decoy
IAPPEAPVTGYM+15.995FGK+0.000	sp|P09874|PARP1_HUMAN	28197778	8262191	42548296	16262007	51624872	118917040	0	FALSE
ALVLDC+57.021HYPEDEVGQEDEAESDIFSIR+0.000	tr|I3L3Q7|I3L3Q7_HUMAN;tr|I3L3B0|I3L3B0_HUMAN;sp|Q07021|C1QBP_HUMAN	114088352	38265128	326835008	62671884	333755360	573856896	0	FALSE
GTEAGQVGEPGIPTGEAGPSC+57.021SSASDK+0.000LPR+0.000	sp|O15355|PPM1G_HUMAN	7.53934e+06	3.33891e+06	29132304	0	28409598	40490432	0	FALSE
HDK+0.000VEDALNLK+0.000EEFDR+0.000LDSSAVLDTGK+0.000YVGLVR+0.000	sp|P42704|LPPRC_HUMAN	7700559	3.44561e+06	18421906	2372836	21593030	25494718	0	FALSE
ADIK+0.000SPSLDVTVPEAELNLETPEISVGGK+0.000	sp|Q09666|AHNK_HUMAN	48120136	19071944	104767936	24387138	96228712	150788752	0	FALSE
TGGTVSDQALLFGDDDAGEGPSSLIR+0.000	tr|G3V529|G3V529_HUMAN;tr|A0A1W2PRR2|A0A1W2PRR2_HUMAN;tr|F5GYL3|F5GYL3_HUMAN;sp|Q9GZR7|DDX24_HUMAN;sp|Q9GZR7-2|DDX24_HUMAN	18333702	439878	73235208	14242518	7089854	90201936	0	FALSE
GVNIGGAGSYIYEK+0.000PLAEGPQVTGPIEVPAAR+0.000	tr|H0YFA4|H0YFA4_HUMAN;sp|P52943|CRIP2_HUMAN;sp|P52943-2|CRIP2_HUMAN	4.01005e+06	3.65557e+06	9554075	0	8.23994e+06	13835882	0	FALSE
FAQPGSFEYEYAMR+0.000	tr|H7C367|H7C367_HUMAN;tr|C9JYS8|C9JYS8_HUMAN;sp|Q15233|NONO_HUMAN;sp|Q15233-2|NONO_HUMAN	13778922	5674073	27900300	831106	34826372	71341872	0	FALSE
ALSIPPNIDVLLC+57.021EQEVVADETPAVQAVLR+0.000	tr|H0YGW7|H0YGW7_HUMAN;sp|Q8NE71|ABCF1_HUMAN;sp|Q8NE71-2|ABCF1_HUMAN	23103456	2649284	31197292	6.19329e+06	30155020	48179604	0	FALSE
IEK+0.000ELEAVC+57.021QDVLSLLDNYLIK+0.000	sp|P61981|1433G_HUMAN	6438392	7.39075e+06	15677518	7.65779e+06	18939596	28747200	0	FALSE
SFEVEEVETPNSTPPR+0.000	tr|K7EPY1|K7EPY1_HUMAN;tr|K7EJV0|K7EJV0_HUMAN;tr|K7ENL0|K7ENL0_HUMAN;sp|Q9UHD8|SEPT9_HUMAN;sp|Q9UHD8-2|SEPT9_HUMAN;sp|Q9UHD8-5|SEPT9_HUMAN;sp|Q9UHD8-7|SEPT9_HUMAN	24822908	3219995	41755412	4.58708e+06	32790228	66325184	0	FALSE
GIAFPTSISVNNC+57.021VC+57.021HFSPLK+0.000SDQDYILK+0.000EGDLVK+0.000	tr|H0YIN7|H0YIN7_HUMAN;tr|F8W0A3|F8W0A3_HUMAN;tr|F8VR77|F8VR77_HUMAN;tr|F8VZ69|F8VZ69_HUMAN;sp|Q9UQ80|PA2G4_HUMAN;sp|Q9UQ80-2|PA2G4_HUMAN	23971868	7.29926e+06	60838864	11516630	43172024	73740256	0	FALSE
TIGGGDDSFNTFFSETGAGK+0.000HVPR+0.000	tr|F8VRK0|F8VRK0_HUMAN;tr|F8VVB9|F8VVB9_HUMAN;tr|F8VRZ4|F8VRZ4_HUMAN;tr|F8W0F6|F8W0F6_HUMAN;tr|F5H5D3|F5H5D3_HUMAN;tr|F8VWV9|F8VWV9_HUMAN;tr|F8VQQ4|F8VQQ4_HUMAN;tr|F8VX09|F8VX09_HUMAN;tr|A0A1W2PQM2|A0A1W2PQM2_HUMAN;tr|F8VS66|F8VS66_HUMAN;sp|P68363|TBA1B_HUMAN;sp|P68363-2|TBA1B_HUMAN;sp|P0DPH7|TBA3C_HUMAN;sp|P0DPH7-2|TBA3C_HUMAN;sp|P0DPH8|TBA3D_HUMAN;sp|Q6PEY2|TBA3E_HUMAN;sp|Q71U36|TBA1A_HUMAN;sp|…	38888672	16560226	86597744	5801611	82966952	194890784	0	FALSE
YLEVSEPQDIEC+57.021C+57.021GALEYYDK+0.000	tr|B0QYA5|B0QYA5_HUMAN;sp|O15371|EIF3D_HUMAN;sp|O15371-2|EIF3D_HUMAN;sp|O15371-3|EIF3D_HUMAN	5.77694e+06	3.24255e+06	13802679	4.01624e+06	13576479	25743212	0	FALSE
FTLDC+57.021THPVEDGIM+15.995DAANFEQFLQER+0.000	sp|P35268|RL22_HUMAN	29403818	10013911	66260832	8232291	62019432	117052984	0	FALSE
ELAPYDENWFYTR+0.000	tr|M0QYF7|M0QYF7_HUMAN;tr|M0R2L9|M0R2L9_HUMAN;tr|M0R140|M0R140_HUMAN;tr|M0QXK4|M0QXK4_HUMAN;sp|P39019|RS19_HUMAN	7.72574e+06	2593230	13569362	0	11411531	23474972	0	FALSE
SGDAAIVDMVPGK+0.000PMC+57.021VESFSDYPPLGR+0.000	tr|A0A087WVQ9|A0A087WVQ9_HUMAN;sp|Q5VTE0|EF1A3_HUMAN;sp|P68104|EF1A1_HUMAN;sp|P68104-2|EF1A1_HUMAN	11698999	3.77816e+06	40492012	11344387	31386330	65337192	0	FALSE
GC+57.021NIENAC+57.021YPLGIC+57.021AER+0.000	sp|P32320|CDD_HUMAN	6039927	2131547	12224083	1.11781e+06	8.11192e+06	15342234	0	FALSE
AGAIAPC+57.021EVTVPAQNTGLGPEK+0.000	tr|G3V210|G3V210_HUMAN;tr|F8VRK7|F8VRK7_HUMAN;tr|F8VPE8|F8VPE8_HUMAN;tr|F8VWS0|F8VWS0_HUMAN;tr|F8VU65|F8VU65_HUMAN;tr|F8VQY6|F8VQY6_HUMAN;tr|F8VW21|F8VW21_HUMAN;sp|P05388|RLA0_HUMAN;sp|P05388-2|RLA0_HUMAN;sp|Q8NHW5|RLA0L_HUMAN	265160016	89781448	513732576	222413264	448353056	844556992	0	FALSE
VVNVANVGAVPSGQDNIHR+0.000	tr|H0YBD0|H0YBD0_HUMAN;sp|O00203|AP3B1_HUMAN;sp|O00203-3|AP3B1_HUMAN	28122670	10752758	47779552	3.23428e+06	52237160	94482056	0	FALSE
EFVEEFIWPAIQSSALYEDR+0.000	tr|Q5T6L6|Q5T6L6_HUMAN;tr|Q5T6L5|Q5T6L5_HUMAN;sp|P00966|ASSY_HUMAN	27235238	7276994	66724880	6862433	57993640	71206136	0	FALSE
GIFPVLC+57.021K+0.000DPVQEAWAEDVDLR+0.000	tr|B4DNK4|B4DNK4_HUMAN;tr|H3BR70|H3BR70_HUMAN;sp|P14618|KPYM_HUMAN;sp|P14618-2|KPYM_HUMAN;sp|P14618-3|KPYM_HUMAN	20873092	9305742	58137580	6.66032e+06	42954992	81078584	0	FALSE
IAIPGLAGAGNSVLLVSNLNPER+0.000	tr|K7EK45|K7EK45_HUMAN;tr|A0A0U1RRM4|A0A0U1RRM4_HUMAN;tr|A6NLN1|A6NLN1_HUMAN;sp|P26599|PTBP1_HUMAN;sp|P26599-2|PTBP1_HUMAN;sp|P26599-3|PTBP1_HUMAN	71460904	22837090	140976352	22993436	139223808	268455328	0	FALSE
SGDAAIVDMVPGK+0.000PMC+57.021VESFSDYPPLGR+0.000	tr|A0A087WVQ9|A0A087WVQ9_HUMAN;sp|Q5VTE0|EF1A3_HUMAN;sp|P68104|EF1A1_HUMAN;sp|P68104-2|EF1A1_HUMAN	11474105	3.74089e+06	39570152	2.39921e+06	34090364	62070768	0	FALSE
LIPYTSVEDFDWC+57.021TPPK+0.000	sp|A6NHR9|SMHD1_HUMAN;sp|A6NHR9-2|SMHD1_HUMAN	1780618	809384	8585492	3.449e+06	12057209	16338151	0	FALSE
GVDLDQLLDMSYEQLMQLYSAR+0.000	tr|K7EQJ5|K7EQJ5_HUMAN;tr|K7ELC2|K7ELC2_HUMAN;tr|K7EJ78|K7EJ78_HUMAN;sp|P62841|RS15_HUMAN	3.30932e+06	634929	12070090	1.55078e+06	10687585	15653093	0	FALSE
AAFDDAIAELDTLSEESYK+0.000DSTLIM+15.995QLLR+0.000	tr|K7EM20|K7EM20_HUMAN;sp|P62258|1433E_HUMAN;sp|P62258-2|1433E_HUMAN	10551003	3.42863e+06	39087528	13714239	28967268	32038324	0	FALSE
DTSNHFHVFVGDLSPEITTEDIK+0.000	tr|E7ETC0|E7ETC0_HUMAN;tr|H7BY49|H7BY49_HUMAN;tr|A6NKZ9|A6NKZ9_HUMAN;tr|C9JTN7|C9JTN7_HUMAN;tr|E7ETJ9|E7ETJ9_HUMAN;sp|Q01085|TIAR_HUMAN;sp|Q01085-2|TIAR_HUMAN;sp|P31483-2|TIA1_HUMAN	9591658	1.95379e+06	20056270	2297911	23620396	51540296	0	FALSE
VFPGSTTEDYNLIVIER+0.000	tr|M0R0K9|M0R0K9_HUMAN;sp|Q13263|TIF1B_HUMAN;sp|Q13263-2|TIF1B_HUMAN	1.18682e+06	401198	1333345	995808	3.77586e+06	8926845	0.000916148	FALSE
K+0.000GYEVIYLTEPVDEYC+57.021IQALPEFDGK+0.000R+0.000	sp|P14625|ENPL_HUMAN	21752118	11651292	61115076	8.35015e+06	55360088	92497264	0	FALSE
SPPYTAFLGNLPYDVTEESIK+0.000EFFR+0.000	tr|F8VSC7|F8VSC7_HUMAN;tr|F8W0K0|F8W0K0_HUMAN;tr|F8VYE9|F8VYE9_HUMAN;tr|F8VRU1|F8VRU1_HUMAN;tr|E7EX17|E7EX17_HUMAN;tr|F8VP89|F8VP89_HUMAN;tr|F8VX11|F8VX11_HUMAN;sp|P23588|IF4B_HUMAN;sp|P23588-2|IF4B_HUMAN	7.13516e+06	2.89252e+06	12642784	3.50729e+06	7698546	12403306	0.000154432	FALSE
VFIM+15.995DNC+57.021EELIPEYLNFIR+0.000	sp|P07900|HS90A_HUMAN;sp|P07900-2|HS90A_HUMAN	15438035	0	26876178	2.65085e+06	11757029	46406372	0	FALSE
VHSPSGALEEC+57.021YVTEIDQDK+0.000YAVR+0.000	tr|Q60FE5|Q60FE5_HUMAN;tr|A0A087WWY3|A0A087WWY3_HUMAN;sp|P21333|FLNA_HUMAN;sp|P21333-2|FLNA_HUMAN	4491176	6649315	30324492	4.3469e+06	23320568	49735556	0	FALSE
TK+0.000PIWTR+0.000NPDDITQEEYGEFYK+0.000	sp|P08238|HS90B_HUMAN	38673512	18887730	104547368	14852794	94259728	166751168	0	FALSE
TSPK+0.000PAVVETVTTAK+0.000PQQIQALMDEVTK+0.000	tr|H0YIP0|H0YIP0_HUMAN;tr|H0YI94|H0YI94_HUMAN;sp|P56192|SYMC_HUMAN	24460508	12010975	65520860	7.3909e+06	62677864	84995520	0.000154432	FALSE
ILDSVGIEADDDR+0.000LNK+0.000VISELNGK+0.000NIEDVIAQGIGK+0.000	sp|P05387|RLA2_HUMAN	8435484	3440793	15824189	1.48099e+06	16319540	51503084	0	FALSE
ITLEC+57.021LPQNVGFYK+0.000	tr|G3V5E4|G3V5E4_HUMAN;sp|Q96EK6|GNA1_HUMAN	16264238	8873723	28060074	4.76903e+06	23426448	40857156	0	FALSE
GIAFPTSISVNNC+57.021VC+57.021HFSPLK+0.000SDQDYILK+0.000EGDLVK+0.000	tr|H0YIN7|H0YIN7_HUMAN;tr|F8W0A3|F8W0A3_HUMAN;tr|F8VR77|F8VR77_HUMAN;tr|F8VZ69|F8VZ69_HUMAN;sp|Q9UQ80|PA2G4_HUMAN;sp|Q9UQ80-2|PA2G4_HUMAN	23395774	7110882	34834916	10700367	35245236	75286152	0	FALSE
GNFTLPEVAEC+57.021FDEITYVELQK+0.000EEAQK+0.000LLEQYK+0.000EESK+0.000K+0.000	tr|A0A1W2PQL0|A0A1W2PQL0_HUMAN;tr|A0A1W2PQD4|A0A1W2PQD4_HUMAN;tr|A0A1W2PP34|A0A1W2PP34_HUMAN;tr|Q5RI18|Q5RI18_HUMAN;tr|A0A1W2PPH7|A0A1W2PPH7_HUMAN;tr|A0A1W2PP35|A0A1W2PP35_HUMAN;tr|A0A1W2PPL4|A0A1W2PPL4_HUMAN;tr|A0A1W2PPS1|A0A1W2PPS1_HUMAN;tr|A0A1X7SBS1|A0A1X7SBS1_HUMAN;sp|Q00839|HNRPU_HUMAN;sp|Q00839-2|HNRPU_HUMAN	108563112	64983376	227837200	47885624	345937248	353042144	0	FALSE
IEYDTFGELK+0.000VPNDK+0.000YYGAQTVR+0.000	sp|P07954|FUMH_HUMAN;sp|P07954-2|FUMH_HUMAN	11549077	6536473	24477550	14801781	19632600	45968768	0	FALSE
GIAFPTSISVNNC+57.021VC+57.021HFSPLK+0.000SDQDYILK+0.000EGDLVK+0.000	tr|H0YIN7|H0YIN7_HUMAN;tr|F8W0A3|F8W0A3_HUMAN;tr|F8VR77|F8VR77_HUMAN;tr|F8VZ69|F8VZ69_HUMAN;sp|Q9UQ80|PA2G4_HUMAN;sp|Q9UQ80-2|PA2G4_HUMAN	25623970	13616246	56693668	6746742	52931456	110294632	0	FALSE
SGDAAIVDM+15.995VPGK+0.000PMC+57.021VESFSDYPPLGR+0.000	tr|A0A087WVQ9|A0A087WVQ9_HUMAN;sp|Q5VTE0|EF1A3_HUMAN;sp|P68104|EF1A1_HUMAN;sp|P68104-2|EF1A1_HUMAN	21212564	0	52157576	7951957	43973360	74454448	0	FALSE
TVNELQNLTAAEVVVPR+0.000	sp|Q9NZI8|IF2B1_HUMAN;sp|Q9NZI8-2|IF2B1_HUMAN	9792412	4.11541e+06	26407490	2.43321e+06	31091980	41217820	0	FALSE
NLPQYVSNELLEEAFSVFGQVER+0.000	tr|C9IZL7|C9IZL7_HUMAN;sp|Q15233|NONO_HUMAN;sp|Q15233-2|NONO_HUMAN	11004972	1.75452e+06	3.54753e+06	0	33439552	14929654	0	FALSE
GIFPVLC+57.021K+0.000DPVQEAWAEDVDLR+0.000	tr|B4DNK4|B4DNK4_HUMAN;tr|H3BR70|H3BR70_HUMAN;sp|P14618|KPYM_HUMAN;sp|P14618-2|KPYM_HUMAN;sp|P14618-3|KPYM_HUMAN	3897418	1.64807e+06	12295029	1.78205e+06	14672956	26533812	0	FALSE
AAVATFLQSVQVPEFTPK+0.000	tr|Q5JRR6|Q5JRR6_HUMAN;sp|P22314|UBA1_HUMAN;sp|P22314-2|UBA1_HUMAN	4744839	1.5291e+06	6.91327e+06	1.86059e+06	9112853	15720352	0	FALSE
GLAFIQDPDGYWIEILNPNK+0.000	sp|Q04760|LGUL_HUMAN;sp|Q04760-2|LGUL_HUMAN	72015656	23826576	151464896	50237920	149024144	262172672	0	FALSE
LM+15.995EPIYLVEIQC+57.021PEQVVGGIYGVLNR+0.000K+0.000	sp|P13639|EF2_HUMAN	13027182	5.88826e+06	30665176	5.23927e+06	27061114	60212768	0	FALSE
SVLELIPELNEK+0.000EEAYNSLMK+0.000	tr|H7C3W8|H7C3W8_HUMAN;sp|P42704|LPPRC_HUMAN	35681816	17080052	74893712	17039206	77790160	136564192	0	FALSE
ELQNAPDAIPESGVEPPALDTAWVEATR+0.000K+0.000	tr|C9JFE4|C9JFE4_HUMAN;tr|A8K070|A8K070_HUMAN;tr|A0A096LP07|A0A096LP07_HUMAN;tr|J3KRJ4|J3KRJ4_HUMAN;tr|J3KTB0|J3KTB0_HUMAN;tr|J3KSA5|J3KSA5_HUMAN;tr|J3QLT0|J3QLT0_HUMAN;tr|J3QS88|J3QS88_HUMAN;tr|A0A096LPJ3|A0A096LPJ3_HUMAN;sp|Q13098|CSN1_HUMAN;sp|Q13098-5|CSN1_HUMAN;sp|Q13098-7|CSN1_HUMAN	4.81918e+06	3.38837e+06	16894856	0	10911679	24145536	0	FALSE
GVNIGGAGSYIYEK+0.000PLAEGPQVTGPIEVPAAR+0.000	tr|H0YFA4|H0YFA4_HUMAN;sp|P52943|CRIP2_HUMAN;sp|P52943-2|CRIP2_HUMAN	4.01005e+06	3.65557e+06	9554075	0	8.23994e+06	13835882	0	FALSE
DYGK+0.000ESQAK+0.000DVIEEYFK+0.000	sp|P25398|RS12_HUMAN	14768668	5.23137e+06	44586280	4.11871e+06	39066496	70770816	0	FALSE
LQLEETDHQK+0.000NLLDEELQR+0.000	sp|Q15149|PLEC_HUMAN;sp|Q15149-2|PLEC_HUMAN;sp|Q15149-3|PLEC_HUMAN;sp|Q15149-4|PLEC_HUMAN;sp|Q15149-5|PLEC_HUMAN;sp|Q15149-6|PLEC_HUMAN;sp|Q15149-7|PLEC_HUMAN;sp|Q15149-8|PLEC_HUMAN;sp|Q15149-9|PLEC_HUMAN	4311741	2.54412e+06	8389825	0	7428517	20706178	0	FALSE
YLEVSEPQDIEC+57.021C+57.021GALEYYDK+0.000	tr|B0QYA5|B0QYA5_HUMAN;sp|O15371|EIF3D_HUMAN;sp|O15371-2|EIF3D_HUMAN;sp|O15371-3|EIF3D_HUMAN	9337920	2.75845e+06	8939578	9061735	14074235	31788444	0	FALSE
SQK+0.000ELPTEPPYTAYVGNLPFNTVQGDIDAIFK+0.000DLSIR+0.000	sp|Q15056|IF4H_HUMAN;sp|Q15056-2|IF4H_HUMAN	66891080	32356938	130497120	23417784	139690864	264015968	0	FALSE
GLDVEDVK+0.000FVINYDYPNSSEDYIHR+0.000	tr|J3KTA4|J3KTA4_HUMAN;sp|P17844|DDX5_HUMAN;sp|P17844-2|DDX5_HUMAN	5.10896e+06	0	8172119	2929578	9086751	25604020	0	FALSE
ADHQPLTEASYVNLPTIALC+57.021NTDSPLR+0.000	tr|A0A0C4DG17|A0A0C4DG17_HUMAN;tr|C9J9K3|C9J9K3_HUMAN;sp|P08865|RSSA_HUMAN	992657	1.93723e+06	3092615	2.60115e+06	5374059	3.68494e+06	0	FALSE
YFEITDESPYVHYLNTFSSK+0.000EPQR+0.000	tr|B4E3S0|B4E3S0_HUMAN;sp|Q9ULV4|COR1C_HUMAN;sp|Q9ULV4-2|COR1C_HUMAN;sp|Q9ULV4-3|COR1C_HUMAN	20867828	15762635	33413506	14924043	45267516	79021440	0	FALSE
AVK+0.000DLVVLLFETALLSSGFSLEDPQTHSNR+0.000	sp|P08238|HS90B_HUMAN	6709723	428612	1.81191e+06	10277854	12575106	1.22999e+06	0.000154432	FALSE
NVLIFDLGGGTFDVSILTIEDGIFEVK+0.000	tr|E9PKE3|E9PKE3_HUMAN;tr|E9PN89|E9PN89_HUMAN;sp|P54652|HSP72_HUMAN;sp|P11142|HSP7C_HUMAN;sp|P11142-2|HSP7C_HUMAN	40421880	0	24936572	0	1.88476e+06	98839	0.000916148	FALSE
YSDNWEAITGTGDPEHYLINVC+57.021K+0.000	sp|P11717|MPRI_HUMAN	10491235	6369510	23925294	11217461	36721808	77148056	0.000154432	FALSE
TATSLAEGLSLVVSPDSIHSVAPENEGR+0.000	sp|Q9BTV4|TMM43_HUMAN	9848165	1.6577e+06	19486180	4830710	23049758	50745008	0.000154432	FALSE
SELHIENLNMEADPGQYR+0.000	tr|A0A087WUV8|A0A087WUV8_HUMAN;tr|A0A087X2B5|A0A087X2B5_HUMAN;sp|P35613|BASI_HUMAN;sp|P35613-2|BASI_HUMAN;sp|P35613-3|BASI_HUMAN;sp|P35613-4|BASI_HUMAN	5.27824e+06	11616513	32667066	6.06647e+06	32581534	58655836	0	FALSE
K+0.000LNVTEQEK+0.000IDK+0.000LMIEMDGTENK+0.000	tr|K7EM90|K7EM90_HUMAN;tr|A0A2R8Y879|A0A2R8Y879_HUMAN;tr|A0A2R8YEM5|A0A2R8YEM5_HUMAN;sp|P06733|ENOA_HUMAN	51095284	27993930	84912424	5.16452e+06	85840720	129588776	0	FALSE
ISNQVDLSNVC+57.021AQYR+0.000	tr|E9PF10|E9PF10_HUMAN;sp|O75694|NU155_HUMAN;sp|O75694-2|NU155_HUMAN	18390252	4961583	30696756	5741901	41704620	67292632	0	FALSE
IFANTPDSGC+57.021VLGMR+0.000	tr|F8VZI0|F8VZI0_HUMAN;tr|A0A2R8Y891|A0A2R8Y891_HUMAN;sp|P08237|PFKAM_HUMAN;sp|P08237-2|PFKAM_HUMAN;sp|P08237-3|PFKAM_HUMAN	47576364	15810646	112440192	0	88141464	135484944	0	FALSE
HYGPGWVSMANAGK+0.000DTNGSQFFITTVK+0.000	sp|P23284|PPIB_HUMAN	8561046	5021309	25122344	11029244	28954340	56045216	0	FALSE
AAFDDAIAELDTLSEESYK+0.000DSTLIM+15.995QLLR+0.000	tr|K7EM20|K7EM20_HUMAN;sp|P62258|1433E_HUMAN;sp|P62258-2|1433E_HUMAN	7519064	4.18353e+06	19955770	9102868	27767254	33986964	0	FALSE
YNFPVEVEVPMER+0.000	sp|P78527|PRKDC_HUMAN;sp|P78527-2|PRKDC_HUMAN	28139050	14704796	54967020	9767240	62939520	93455064	0	FALSE
SLSFPILNPALSQPSQPSSPLPGSHGR+0.000	tr|E9PN76|E9PN76_HUMAN;sp|Q8ND24|RN214_HUMAN;sp|Q8ND24-2|RN214_HUMAN	8944330	221160	16864428	1.73069e+06	10564806	29616914	0	FALSE
EIFDIAFPDEQAEALAVER+0.000	tr|K7EJE8|K7EJE8_HUMAN;tr|K7EKE6|K7EKE6_HUMAN;sp|P36776|LONM_HUMAN;sp|P36776-2|LONM_HUMAN;sp|P36776-3|LONM_HUMAN	17536284	5328839	32808744	4.60977e+06	31238242	50311544	0	FALSE
ASFATPYGYAMETAK+0.000	sp|O95671|ASML_HUMAN;sp|O95671-2|ASML_HUMAN	6964869	2529677	19154542	6.33616e+06	15537374	26291252	0	FALSE
AAVPSGASTGIYEALELR+0.000	tr|E5RI09|E5RI09_HUMAN;tr|K7ERS8|K7ERS8_HUMAN;tr|K7EM90|K7EM90_HUMAN;tr|A0A2R8Y798|A0A2R8Y798_HUMAN;tr|A0A2R8YEG5|A0A2R8YEG5_HUMAN;tr|A0A2R8Y879|A0A2R8Y879_HUMAN;tr|A0A2R8Y6G6|A0A2R8Y6G6_HUMAN;tr|E5RGZ4|E5RGZ4_HUMAN;tr|A0A2R8YEM5|A0A2R8YEM5_HUMAN;tr|E5RG95|E5RG95_HUMAN;tr|K7EKN2|K7EKN2_HUMAN;tr|F5H0C8|F5H0C8_HUMAN;tr|K7EPM1|K7EPM1_HUMAN;tr|F5H1C3|F5H1C3_HUMAN;sp|P13929|ENOB_HUMAN;sp|P13929-2|ENOB…	444190752	134955456	946601088	62816760	823077824	1338507008	0	FALSE
DIVPGDIVEIAVGDK+0.000VPADIR+0.000	sp|P16615|AT2A2_HUMAN;sp|P16615-2|AT2A2_HUMAN;sp|P16615-3|AT2A2_HUMAN;sp|P16615-5|AT2A2_HUMAN	4.45284e+06	1.67167e+06	9324796	1.98149e+06	9031344	24501964	0	FALSE
ELNIDVADVESLLVQC+57.021ILDNTIHGR+0.000	tr|B4DIH5|B4DIH5_HUMAN;sp|P61201|CSN2_HUMAN;sp|P61201-2|CSN2_HUMAN	17579738	12011100	10562642	23099034	70846840	11333170	0.000154432	FALSE
LHQEYVPSAHLSGTC+57.021TC+57.021LAWAPAR+0.000	sp|Q15061|WDR43_HUMAN	5495185	1.73196e+06	8105512	1.66419e+06	9657886	23425748	0	FALSE
ESPLSLYNEELVSMNVQGDYEPTDATGFININSLR+0.000	sp|P00966|ASSY_HUMAN	3.32035e+06	2.97494e+06	14758179	3822067	11079028	14302658	0	FALSE
SGDAAIVDM+15.995VPGK+0.000PMC+57.021VESFSDYPPLGR+0.000	tr|A0A087WVQ9|A0A087WVQ9_HUMAN;sp|Q5VTE0|EF1A3_HUMAN;sp|P68104|EF1A1_HUMAN;sp|P68104-2|EF1A1_HUMAN	21776906	12016213	53449848	22694956	47849328	83208928	0	FALSE
LTGEDVFGITVPLITSTTGAK+0.000	tr|H0YHS6|H0YHS6_HUMAN;sp|Q9Y2Z4|SYYM_HUMAN	9538345	3516452	16738546	4.15644e+06	25349282	47618768	0	FALSE
VMIPVPAGVEDGQTVR+0.000	sp|Q96EY1|DNJA3_HUMAN;sp|Q96EY1-2|DNJA3_HUMAN;sp|Q96EY1-3|DNJA3_HUMAN	22671426	2.62922e+06	31073576	18323696	33127742	75069280	0	FALSE
C+57.021DVDIR+0.000K+0.000DLYANTVLSGGTTMYPGIADR+0.000	tr|A0A2R8Y793|A0A2R8Y793_HUMAN;sp|P63261|ACTG_HUMAN;sp|P60709|ACTB_HUMAN	1.76798e+06	0	5.86529e+06	0	6556305	15536790	0	FALSE
GIFPVLC+57.021K+0.000DPVQEAWAEDVDLR+0.000	tr|B4DNK4|B4DNK4_HUMAN;tr|H3BR70|H3BR70_HUMAN;sp|P14618|KPYM_HUMAN;sp|P14618-2|KPYM_HUMAN;sp|P14618-3|KPYM_HUMAN	4.05672e+06	1.49491e+06	12181769	1.77889e+06	14364977	25924516	0	FALSE
FFVADTANEALEAAK+0.000R+0.000	tr|E9PDQ8|E9PDQ8_HUMAN;sp|Q96I99|SUCB2_HUMAN;sp|Q96I99-2|SUCB2_HUMAN	16002565	8.02028e+06	38660812	3.66129e+06	21565692	75627152	0	FALSE
AK+0.000VDEFPLC+57.021GHMVSDEYEQLSSEALEAAR+0.000	tr|B8A6G2|B8A6G2_HUMAN;tr|X1WI28|X1WI28_HUMAN;tr|A6QRI9|A6QRI9_HUMAN;sp|P27635|RL10_HUMAN	11046407	8.3077e+06	29384918	5.58099e+06	21115008	39254380	0	FALSE
LVSDGNINSDR+0.000IQEK+0.000	tr|A0A087WUZ3|A0A087WUZ3_HUMAN;sp|Q01082|SPTB2_HUMAN;sp|Q01082-2|SPTB2_HUMAN;sp|Q01082-3|SPTB2_HUMAN	5465952	0	12894446	837142	10629104	17769526	0	FALSE
NVLIFDLGGGTFDVSILTIEDGIFEVK+0.000	tr|E9PKE3|E9PKE3_HUMAN;tr|E9PN89|E9PN89_HUMAN;sp|P54652|HSP72_HUMAN;sp|P11142|HSP7C_HUMAN;sp|P11142-2|HSP7C_HUMAN	38627948	0	19610816	661458	1298518	0	0.000916148	FALSE
LGAASLGAEDPETQVVLINAVK+0.000DVAK+0.000	sp|Q9Y490|TLN1_HUMAN	28395184	12903997	58149108	8.16394e+06	61409876	97174312	0	FALSE
IIPTLEEGLQLPSPTATSQLPLESDAVEC+57.021LNYQHYK+0.000	sp|P61978|HNRPK_HUMAN;sp|P61978-2|HNRPK_HUMAN	17891476	10571965	36413456	26237284	49738244	96974952	0.000154432	FALSE
SVGMIAGGTGITPM+15.995LQVIR+0.000	sp|P00387|NB5R3_HUMAN;sp|P00387-2|NB5R3_HUMAN;sp|P00387-3|NB5R3_HUMAN	5768103	646962	10437497	1.47654e+06	8.34781e+06	23046160	0	FALSE
EEFASTC+57.021PDDEEIELAYEQVAK+0.000	sp|O00299|CLIC1_HUMAN	74254952	22182974	162721536	45858776	132103104	283241536	0	FALSE
LTVLPPELGNLDLTGQK+0.000	sp|Q15404|RSU1_HUMAN;sp|Q15404-2|RSU1_HUMAN	43505468	13044720	77214416	21416814	80867760	151399728	0	FALSE
GLVYETSVLDPDEGIR+0.000	tr|B4DJV2|B4DJV2_HUMAN;tr|H0YH82|H0YH82_HUMAN;tr|F8VZK9|F8VZK9_HUMAN;tr|F8VX68|F8VX68_HUMAN;tr|F8VPF9|F8VPF9_HUMAN;tr|F8VRP1|F8VRP1_HUMAN;tr|F8VX07|F8VX07_HUMAN;tr|F8VTT8|F8VTT8_HUMAN;tr|F8W642|F8W642_HUMAN;tr|A0A0C4DGI3|A0A0C4DGI3_HUMAN;tr|F8W1S4|F8W1S4_HUMAN;tr|F8W4S1|F8W4S1_HUMAN;tr|F8VPA1|F8VPA1_HUMAN;sp|O75390|CISY_HUMAN	149586400	48712896	296743904	16371911	257963376	523934848	0	FALSE
YLEVSEPQDIEC+57.021C+57.021GALEYYDK+0.000AFDR+0.000	tr|B0QYA5|B0QYA5_HUMAN;sp|O15371|EIF3D_HUMAN;sp|O15371-2|EIF3D_HUMAN;sp|O15371-3|EIF3D_HUMAN	19367186	11126377	48351708	8546445	44054824	88325200	0	FALSE
SQK+0.000ELPTEPPYTAYVGNLPFNTVQGDIDAIFK+0.000DLSIR+0.000	sp|Q15056|IF4H_HUMAN;sp|Q15056-2|IF4H_HUMAN	68280664	32931282	131209080	23096654	139518432	264196496	0	FALSE
TNIVTASVDAINFHDK+0.000IR+0.000	tr|K7EKP8|K7EKP8_HUMAN;sp|O00154|BACH_HUMAN;sp|O00154-2|BACH_HUMAN;sp|O00154-3|BACH_HUMAN;sp|O00154-4|BACH_HUMAN;sp|O00154-5|BACH_HUMAN;sp|O00154-6|BACH_HUMAN;sp|O00154-7|BACH_HUMAN	4297880	2.15357e+06	16829840	1.66253e+06	17578692	27788704	0	FALSE
YVATLGVEVHPLVFHTNR+0.000	tr|B5MDF5|B5MDF5_HUMAN;tr|F5H018|F5H018_HUMAN;tr|J3KQE5|J3KQE5_HUMAN;tr|H0YFC6|H0YFC6_HUMAN;sp|P62826|RAN_HUMAN	19348300	5.05629e+06	39584876	4.45344e+06	32099356	67894840	0	FALSE
AGEGTYALDSESC+57.021MEK+0.000	tr|B3KXD6|B3KXD6_HUMAN;tr|B5MCF9|B5MCF9_HUMAN;sp|O00541|PESC_HUMAN;sp|O00541-2|PESC_HUMAN	2.54033e+06	1.01038e+06	11237256	900347	16186489	24793804	0	FALSE
TIEK+0.000FEK+0.000EAAEM+15.995GK+0.000	tr|A0A087WV01|A0A087WV01_HUMAN;tr|A0A2R8Y488|A0A2R8Y488_HUMAN;tr|A0A2R8YDN5|A0A2R8YDN5_HUMAN;tr|A0A087WVQ9|A0A087WVQ9_HUMAN;tr|Q5JR01|Q5JR01_HUMAN;tr|A6PW80|A6PW80_HUMAN;tr|A0A2U3TZH3|A0A2U3TZH3_HUMAN;tr|A0A2R8Y660|A0A2R8Y660_HUMAN;sp|Q5VTE0|EF1A3_HUMAN;sp|Q05639|EF1A2_HUMAN;sp|P68104|EF1A1_HUMAN;sp|P68104-2|EF1A1_HUMAN	918657	784387	0	0.584252	2.76386e+06	6.9732e+06	0.000154432	FALSE
DLISHDEMFSDIYK+0.000	tr|A0A0B4J2C3|A0A0B4J2C3_HUMAN;tr|Q5W0H4|Q5W0H4_HUMAN;sp|P13693|TCTP_HUMAN	52948024	16681219	119098528	17647064	91428008	286772608	0	FALSE
STSESFIQHIVSLVHHVK+0.000	tr|E9PKI6|E9PKI6_HUMAN;tr|E9PK91|E9PK91_HUMAN;tr|E9PJA7|E9PJA7_HUMAN;tr|A0A1W2PQ43|A0A1W2PQ43_HUMAN;tr|E9PK09|E9PK09_HUMAN;tr|E9PQN2|E9PQN2_HUMAN;sp|Q9NYF8|BCLF1_HUMAN;sp|Q9NYF8-2|BCLF1_HUMAN;sp|Q9NYF8-3|BCLF1_HUMAN;sp|Q9NYF8-4|BCLF1_HUMAN	2.10551e+06	0	392893	1.2179e+06	124999	0	0.000916148	FALSE
ALEQQVEEMK+0.000TQLEELEDELQATEDAK+0.000	sp|P35579|MYH9_HUMAN;sp|P35579-2|MYH9_HUMAN	9782559	9985495	36156152	12794330	41786884	85812320	0	FALSE
VVEVLAGHGHLYSR+0.000	sp|P49327|FAS_HUMAN	2.37168e+06	47701.1	7.82638e+06	499136	5197873	8801972	0	FALSE
ER+0.000LEQQVPVNQVFGQDEMIDVIGVTK+0.000	tr|G5E9G0|G5E9G0_HUMAN;tr|H7C422|H7C422_HUMAN;tr|B5MCW2|B5MCW2_HUMAN;tr|H7C3M2|H7C3M2_HUMAN;sp|P39023|RL3_HUMAN	7.67336e+06	4473344	17502678	0	16458752	27497124	0	FALSE
ISMPDVDLNLK+0.000GPK+0.000	sp|Q09666|AHNK_HUMAN	11057303	1.42701e+06	27868730	7.0858e+06	18462314	27120984	0	FALSE
TYNASITLQQQLK+0.000ELTAPDENIPAK+0.000	sp|P11387|TOP1_HUMAN	5396214	6.73734e+06	19249192	3.86368e+06	19838258	35711112	0	FALSE
FVIGGPQGDAGLTGR+0.000	sp|P31153|METK2_HUMAN;sp|P31153-2|METK2_HUMAN	148009904	59392776	267211536	19708934	349815360	724466048	0	FALSE
HFVDSHHQK+0.000PVNAIIEHVR+0.000	sp|Q7KZF4|SND1_HUMAN	2.4595e+06	4774585	18087508	0	14383655	28912820	0	FALSE
TVDFTQDSNYLLTGGQDK+0.000	sp|Q9Y3F4|STRAP_HUMAN;sp|Q9Y3F4-2|STRAP_HUMAN	40280788	12789621	73747296	11408792	82635888	154371168	0	FALSE
[truncated: 4,578 more rows]

## Sheet: Fr3
Peptide	MatchedProteins	Quantity_1	Quantity_2	Quantity_3	Quantity_4	Quantity_5	Quantity_6	QValue	Decoy
[truncated: 4,626 more rows]

[truncated: 29 more sheets: Fr4, Fr5, Fr6, Fr7, Fr8, Fr9, Fr10, Fr11, Fr12, Fr13, Fr14, Fr15, Fr16, Fr17, Fr18, Fr19, Fr20, Fr21, Fr22, Fr23 …]
